# Supplementary material for: Exploration of Extracellular Vesicle miRNAs, Targeted mRNAs and Pathways in Prostate Cancer: Relation to Disease Status and Progression
Source: Cancers (Basel). 2022 Jan 21;14(3):532. doi: 10.3390/cancers14030532 (PMC8833493; doi:10.3390/cancers14030532)
Supplement: Supplementary file 1 [file cancers-14-00532-s001.zip › cancers-1463070-Supplementary Tables.xlsx]

## Sheet: Table S1
Table S1. Raw count data from miRNAseq in the main study. Count data is expressed as counts per million (CPM) reads. Micro RNA sequencing (miRNAseq).
Name	Evs P1 UC	Evs P2 UC	Evs P3 UC	Evs P4 UC	Evs P5 UC	Evs P6 UC	Evs P7 UC	Evs P8 UC	Evs P9 UC	Evs P10 UC	Evs P11 UC	Evs P12 UC	Evs P13 UC	Evs P14 UC	Evs P15 UC	Evs P16 UC	Evs P17 UC	Evs P18 UC	Evs P19 UC	Evs P20 UC	Evs P21 UC	Evs P22 UC	Evs P23 UC	Evs P24 UC	Evs P25 UC	Evs P26 UC	Evs P27 UC	Evs P28 UC	Evs P29 UC	Evs P30 UC	EVs C1 UC	EVs C2 UC	EVs C3 UC	EVs C4 UC	EVs C5 UC	EVs C6 UC	EVs C7 UC	EVs C8 UC	EVs C9 UC	EVs C10 UC
hsa-let-7a-5p	95068.9	93578.4	110859	119723	100281	88809.8	79806.3	96977.8	97103.8	93251.5	108083	139217	100285	103346	91718.8	113183	83129.5	108867	105246	93761.2	95340.8	82940	115114	104843	82093.3	114473	82020	90308.5	98814.2	93182.3	124398	89940.7	114531	88818.4	113945	119358	114038	101941	116184	96754.3
hsa-miR-30a-5p	85625.4	103067	98394.2	47322.7	118028	108976	92669.4	101478	96221.7	87481.6	89395.4	68848.4	105121	83709.5	92090.8	87406.6	113991	87442	112326	108080	75942.5	130778	112080	107192	98400.5	81024.5	86641.7	91186.9	54871.9	52410.5	83921.2	81018.2	83859.1	104810	75603	86072.9	90782.5	78015.8	99246	85829.5
hsa-let-7f-5p	68805.6	59653.3	76043.5	86277.2	68713.5	62121.5	56393	64906.6	60879.2	68751.2	88473.2	99503.1	69750.4	73078.1	67680.1	85060.6	58508	58229.2	67729.2	67706.8	56020	58831.6	73699.3	70218.2	47744.2	58669.1	59377.8	66475.3	60894.7	77294.2	77077	66564.9	72306.2	56094.4	75429.3	79786.8	76491.2	72479.3	84610.1	73704.8
hsa-let-7b-5p	54262	61064.8	66768.9	61499.5	62339.6	53523.3	53380.1	64010.5	67822.6	57318.3	66303.7	67780.5	70132.8	61302.1	50726.2	60839.8	52500.5	67496.6	61931.9	59681.2	61614.1	52339.8	73172	68451.7	61243.4	78758.5	54852.3	45999.7	68164.7	48273.5	76124.5	53591.1	67220.1	57644.7	64720.5	69314.4	77031.3	58202.3	60753.8	56870.3
hsa-miR-125a-5p	48018.2	51471.4	53396	31622.6	37239.3	48639.7	65826.3	62385.6	53748.9	66529.9	64608	40746.1	55863.3	47723.9	49831.1	50695	50305.8	44661.3	48830.7	64600.3	31331.5	49241.3	69124.8	57266.2	52787	36297	45606.9	49145.9	44919.9	35685.6	60365.7	58278.8	49550.7	60352.6	51759.8	53781.3	52383.8	62654	42299.8	50434.2
hsa-miR-30d-5p	35675.6	39935.9	43010.4	18447.1	58922.4	52079.7	44460.4	44754.4	44212.7	41095.1	35844.9	23577	54772.2	43895.5	31926.2	34575.8	43916.3	37492.9	40153.3	34591.2	37190.9	50745.8	47370.9	53744.5	33516.5	42103.5	53903.6	39693.3	28471.8	23370.8	39247.3	31763.7	40357.7	42463.8	43106.3	46090.9	48698.6	44274.9	70291	41038.2
hsa-miR-26a-5p	35521.6	32606.5	34552.4	20464.9	35795.3	35914.9	31597.3	32282.4	27364.8	31848.8	28257.4	28916.9	33917.6	32582	36461.5	32747	34696.3	38389.1	40434.2	32947.7	29418.4	34826.5	38072.6	38371.8	29118.5	36968.6	36641.9	32636.7	27294.9	29277.3	36951	39278.9	34147.8	38135	32507	36155	37563.5	37909.9	43770.5	37319
hsa-miR-125b-5p	32156.9	33125	28716	34282.1	28965.9	31002.3	35491.6	32227.4	37174.4	30971.5	27685.2	20237.3	34457.9	31578.3	29754.3	18826.7	35183.5	31417.3	30852.2	33852.9	37083	26548	39222.4	41860.5	28086.7	43110.3	34947.1	26658.1	40803	12255.4	36756.5	29575.7	32292.9	36505.9	27664.4	33676	28837.3	32019.1	39334.6	25369.8
hsa-miR-10a-5p	31418.4	28528.3	30991.7	10855.5	34574.9	38953	39266	33774.2	27905.9	31872.9	29575.1	19848.1	33122.4	31614.7	26653.9	28408.2	32609	25462.8	32536	36311.9	19485.8	27978.6	44667.4	38276.3	33535.5	25730.4	41772.6	34840.8	21558.8	15623.9	33822.9	35231	23963.9	36037.8	29403.4	32126	36184.4	37047.9	49360.3	30732.7
hsa-miR-26b-5p	27601	29848.2	27587.1	32971.1	29160.6	26987.1	21032.1	25363.9	22491	22840.3	28413.1	29849.1	24075.6	28619.8	28227.2	28584.8	27765.6	30780.5	34417.1	25742.7	32679.2	25370.9	30565	28776	24300.1	38136.9	29209.2	25852.1	29336.7	32197.1	32946.4	29165.6	31424.5	26319.9	29382.7	30367.4	29028.4	27325.5	34301.9	27273.3
hsa-miR-21-5p	25442.2	21037.3	17426.8	30339	19260.5	16291	17613.9	18534.6	18093.5	15597.1	15458.6	21395.8	14230	15328.1	17507.7	22291	22065.1	28738	20698.4	19006.8	23956.3	29238.4	18051	26706	31466.1	24976.6	14596.1	17856.9	25621.6	177389	14951.7	20679.3	19893.5	19467.7	18601.4	14882.3	16459	17495.4	13442.5	12818.2
hsa-miR-200a-3p	24984.1	19717.4	17154.6	17293.4	18026.9	21502.3	19636.3	17533.5	14821.5	16262.3	16580.3	18653.4	16422.6	16424.8	19127.2	21076	19098.9	20072.7	23002	17348.4	17085.5	21174.7	19117.5	20741	22204.8	18789.8	20735.7	28334.8	19239.6	34110.7	20168.1	22444.2	17847.4	18504.6	21057.9	19235.9	19440	17584	22454.3	20584.1
hsa-miR-10b-5p	24456.3	30769.4	29010.5	12873.3	36972.3	41785.6	30869.8	31640.2	26725.1	28456.7	25623.8	15965.4	32362.9	25611.8	22311.6	32057.5	33413.6	30950.3	30678.1	30981.9	21891.3	30190.7	41999.6	31451.9	25710.7	26371.7	31406.7	31315.3	19073.7	13552.3	34824.6	25134.1	25064.3	35128.4	33977.2	33295.1	32875.2	31315	33288	26404.3
hsa-miR-141-3p	24025.6	19848.1	18176.4	31345.4	18052.1	16244	19990.1	15489.9	17088.3	15184.7	17821	25830.6	15365	15940.4	17969.2	22421.3	18628.3	21195.4	20055.4	16793.9	22672.1	24777.4	16548.2	22400	28495.1	26957.2	18204.1	23796	26527.9	54440.4	20212.8	27105.6	20328.5	17853.6	21506.6	16955.6	16979.5	21884.8	17799.2	17288.4
hsa-miR-29c-3p	20877.2	21403.7	18437.5	17678	22591.7	17560.1	29782.9	21492.7	31140.4	21591.2	15112.1	13195.9	28935.5	18990.6	18839.1	13983.4	22678.3	14723.6	14751	20565.9	18020.5	27238.3	14127.3	23764.1	22157.4	25819.9	29467.7	17467.6	18819.2	15521.5	11729.7	16867.6	17952.5	17021.4	15545.3	15576.2	13567.5	16647.7	15354.1	16367
hsa-miR-16-5p	18298.7	24299.3	20679.7	23831.2	21938.8	20762.6	26228.1	24637.5	26835.9	18458	24803.1	21929.8	26721.3	18667.7	18632.1	22223.7	20288.5	22934.4	24960.5	24518.5	22885.6	21321.4	27224.8	26437.8	26074.2	25509.6	19856.1	20581.9	22191.1	40631.5	21080.4	20357.9	17879.5	18172.4	17338.1	18253.9	19975.2	21070.7	16581.9	17023.5
hsa-miR-200c-3p	18284	12208.9	12962.5	17410.8	10901.4	10916.9	17559.8	14676.8	13882	12945.4	12982.5	17277.7	13876.8	9326.59	14555.5	17317.3	10640	15291.2	12796.3	14279.9	16319	14347.4	14507.3	14634.4	18235.5	16709.6	13206	16148.4	20613.4	25208.6	15647	16739.6	16461	13164.1	16500.6	12159.9	13522.2	15139.1	9426.35	12666.4
hsa-miR-203a-3p	14756.2	7715.93	8689.98	10001.4	8491.52	10270	15399.1	13895.5	9486.42	12037.9	13596.7	8525.73	8411.76	5688.75	9010.49	16993.6	6899.19	7721.85	8449.9	6971.48	6463.78	10834.8	7185.97	5892.3	17109.5	6988.99	7489.35	12861.9	10746.6	30208.9	7291.37	9673.76	7267.98	4709.62	11161.7	4976.22	6269.35	4525.92	2550.66	9159.73
hsa-miR-191-5p	14626.1	12990.1	11773.3	12049.2	15242.5	13209	16450.3	16064.9	14986.8	15111	13938	7168.13	15268.2	10773.9	12074.6	11137.1	12722.8	12443.6	12664	15449.2	17978.3	12112.6	13738.6	16424.2	16806	16171.2	15746.6	15186.7	15414	20394.1	10072.9	9962.43	12141	10704.5	14844.4	9412.59	9209.91	11642.9	7945.07	9745.3
hsa-let-7c-5p	12892.5	11889.7	12409.2	21623.6	11684.1	10058.5	12058.3	11627.2	13320.3	9985.21	11094.4	14653	11482.2	12971.7	9182.51	10153.3	10557.4	13346.2	12007.1	10505.8	15003.3	10922.8	15490.4	16779.4	10047.2	16807.2	11074	9122.53	17338.3	5196.18	17992.5	13167.3	15626.2	14385.6	14323.3	16314.7	15827.1	13359.8	19576.2	10607.6
hsa-miR-200b-3p	12029.3	9671.51	9151.81	8615.48	9446.78	10188.3	11248.5	9587.17	8189.06	8814.37	9043.48	9195.48	9403.7	7687.31	10108.3	10090.2	8539.92	10541.1	10817.7	10092.8	11327.5	9787.03	10949.5	10951.4	11228.2	10536.3	10856.5	12394.8	11536.6	14760.6	9992.38	10772.7	10061.3	9776.62	10216.7	9516.92	9618.97	9648.1	10287.1	9627.17
hsa-miR-29a-3p	11741.6	11146.3	9374.92	6787.5	15502.9	9193.81	16114.9	12799.2	15218.9	12418.7	9624.45	5882.94	14511	12971.7	9056.64	5970.05	12979.5	8674.7	7455.57	12956.4	13046.1	13429.1	7516.2	15074.9	11274.4	15253.3	19621.9	7952.47	11016.1	8301.75	5800.01	9473.66	10411.6	10942.7	6842.17	8947.26	9160.92	12124.2	15634	8327.8
hsa-miR-30a-3p	11609.6	15275.6	16663.8	7716.47	21455.5	16547	15732	19297.6	17871.8	16515.1	19212.1	12562.3	19162.1	14341.9	12207.4	16421.8	15722.1	12569.4	18746.9	18652.9	12586.7	16244.1	21867.6	18822.2	16900.2	12808.3	15537.9	15056.2	9426.89	8438.26	17062.4	12553.9	14512.6	16409	13014.4	14827.7	16133.3	14925.9	14820.8	13528.7
hsa-miR-204-5p	11228.4	18623.8	16750.8	7132.12	11583.8	19199.1	9940.11	12397.5	13674.4	16758.9	14315.9	12707.1	13531.7	11616.1	10655.1	16585.8	19528.9	14146.5	21241.6	13641.9	11151.5	17804.7	24912.2	21516.8	15338.5	11011.4	11394.4	17640.8	7269.96	7569.91	23010	9467.1	12101.6	18397.2	18537.3	14001.3	14007.1	10160.6	7126.53	12912.7
hsa-miR-103a-3p	11091	8292.37	7114.85	7871.3	8836.2	8997.75	10935.5	8499.41	8927.46	9119.87	7550.82	4995.97	8152.41	6669.12	9750.3	6945.44	9139.62	10023.8	8598.47	10204.8	10333.6	9895.07	8048.9	9723.11	9861.29	11109	9830.67	9580.9	11259.1	9031.06	6647.42	8843.83	9181.3	7412.58	8192.41	7385.67	7448.76	6633.22	6104.69	7608.92
hsa-let-7e-5p	11052.5	11876.3	13939.7	10178.8	11451	10803.7	14113.2	14359.4	15281.8	14024.4	16053.6	15549.1	15857.7	12533.9	11477.4	15707.1	11246.5	10891.7	12870.6	15935.1	9650.05	12842.2	16455.1	14504.2	12242.4	9425.88	10813.4	12036.2	10158.1	11679.1	15763.3	14289.2	13277.9	14068.5	13779.5	14945.2	15408.2	14482.9	11277.3	14028.2
hsa-miR-30e-5p	10554	11224.4	11347.2	7319.41	11783.7	11777.2	9937.61	9465.09	8907.73	10006.3	9872.93	10688.8	10697.5	13047.3	9347.53	10699.8	11488.9	9542.65	11861.6	8254.87	7209.86	15621.2	10688.6	9753.81	8609.43	8912.39	12058.2	10545.9	6911.82	9134.7	9938.71	9608.15	10761.9	11222.9	11079	12845.4	11803.9	10249.2	20695.7	11567.8
hsa-miR-27b-3p	10304.8	10971.2	12955.8	8700.39	14460.9	10031.9	8718.3	9943.65	13093.9	10373.5	12427.8	13313.5	14829.9	13496.8	8841.28	10847	12210.2	9440.44	11812.8	11193.5	10104.4	12140.6	11641.3	12612.1	9519.24	9119	11548.5	8199.2	7850.36	17604.6	11792.3	9027.53	12408.1	10714.5	11256.8	16096.1	12565.6	9669.65	14823.4	12926.2
hsa-miR-30c-5p	9097.11	11908.6	11666.2	5419.01	15482.1	12886.8	10500.2	12633.1	10652.3	11284	10954.4	6996.17	11536.6	9514.22	10046.8	8917.24	11012.3	9858.69	13916.8	13590.2	11515	11387.6	13471.1	12068.2	11015.8	11053.2	12297	12824.6	6942.91	5538.71	9894	7521.85	9226.54	11273.2	9209.74	9503.67	9067.84	9624.16	10453.5	9017.98
hsa-miR-101-3p	8664.61	9558.38	8181.3	8235.9	10901.4	9256.28	6695.82	6883.03	8540.41	6290.61	7550.82	8109.4	8732.22	9640.77	6786.89	8568.28	10512.4	7885.38	11517.2	6438.06	7185.32	11324.3	9302.68	9432.11	7261.46	9508.66	10943.5	7647.62	7208.93	7381.58	8921.37	9709.85	9506.75	9219.59	8959.54	11267.3	9120.51	7488.12	12183	8827.3
hsa-miR-429	8202.79	6295.03	5896.69	6882.39	4831.35	6124.26	6120.7	5099.4	4901.98	5488.48	5692.42	7014.27	5045.42	5111.3	7419.01	7260.76	5362.03	5827.16	6895.33	5544.44	4804.88	6841.92	5505.6	5787.72	6690.53	4804.47	6075.52	8495.28	6341.79	14065.4	5960.99	6711.6	5826.06	5523.36	7042.74	6491.44	5941.13	5555.62	6857.21	6832.68
hsa-miR-99b-5p	7753.8	9928.75	8056.36	5066.9	8977.36	8622.33	12009.2	10838.5	11609.5	10004.8	9979.68	5855.78	11304.9	8258.95	7430.2	7706.41	9970.5	7228.13	8815.13	11271.6	8378.78	8511.88	10862.9	11781.2	10621.9	7743.41	8961.13	8857.15	7200.87	7736.75	8471.94	7954.86	7076.8	9610.52	8605.96	8195.45	8063.57	7847.32	6284.24	8132.05
hsa-let-7i-5p	7576.04	9717.3	10546.2	9172.36	10337.8	9030.53	10744.9	10170.7	10635.4	11789.6	13945	14381.5	12026.3	8320.04	9506.96	11103.5	9482.63	8506.46	9722.8	13256.4	8807.17	8759.31	12981.7	11972.7	10226.1	8331.6	8242.69	10169.8	7682.23	13298.2	9536.25	10359.4	8453.04	10080.3	7770.59	8917.46	10950.2	13254.5	7683.67	8555.61
hsa-miR-192-5p	7330.47	12136.2	7712.78	7476.74	18824.3	11706.1	4570.13	6674.27	12040.7	4134.04	9617.45	5882.94	8122.6	12218.2	4445.81	7904.01	14203.7	10093	10509	5767.32	12443.1	9513.59	10577	5896.28	5533.5	8231.32	8500.27	4590.32	6483.43	8790.9	5746.34	3391.89	8739.09	7897.47	8194.48	10850	8570.61	2205.49	5148.85	6783.74
hsa-miR-148a-3p	7050.08	7415.59	6412.07	16721.5	7177	5204.57	6244.71	6926.98	5311.57	5724.75	6355.64	8009.84	5366.62	6487.3	5884.86	6684.77	6129.11	10772.2	6660.87	5457.83	16588.5	8585.24	5794.69	7757.69	8757.37	14885.2	6018.79	4276.7	15113.4	8011.03	9133.78	7367.67	10923.9	6573.68	7350.84	7279.69	6159.13	8472.32	6384.57	4686.18
hsa-miR-93-5p	5499.68	5152.93	4785.62	4764.73	5542.23	5263.33	5876.84	5935.67	5442.15	5208.56	5149.95	3312.55	5207.14	4309.84	4696.14	5436.11	5222.43	5308.28	5428.21	5319.45	6958.39	5880.22	5243.58	6236.16	6729.73	6138.33	5861.63	6315.26	5418.21	6577.69	4639.56	4910.69	5430.55	4583.79	5210.72	4274.09	4394.3	4037.4	3171.16	4643.99
hsa-let-7g-5p	4948.07	4390.63	4578.14	5843.54	4547.59	4616.39	4287.15	4502.42	4363.68	5164.92	5568.18	6769.9	4393.31	4898.93	4940.88	5579.05	4064.31	4341.28	5216.96	4945.53	4739.58	4390.33	4632.93	5023.26	3864.35	4788.31	5115.58	5285.56	4646.65	5414.84	5283.51	4733.55	5342.99	4008.3	5458.85	5320.67	5454.91	5316.15	5914.58	4809.37
hsa-miR-29b-3p	4935.24	4148.2	4062.76	5701.2	4126.67	3621.86	4511.04	3491.57	4381.53	4167.15	4542.74	5584.26	4409.71	4600.75	4756.28	4061.32	3908.94	3014.21	4144.47	4608.57	4444.57	3977.5	2993.7	4214.47	4373.95	4453.17	4982.69	4362.23	4533.8	6184.6	3322.59	4769.63	3975.5	3605.62	3655.78	3661.37	2993.22	4205.03	4887.45	3631.49
hsa-miR-92a-3p	4337.8	3398.03	3560.77	2147.63	2971.54	4045.53	3965.89	3829.74	3046.59	3575.71	3135.82	2344.12	3888.03	3341.11	3285.06	3788.04	3352.77	4619.59	3556.39	2955.49	2741.21	3872.8	4174.95	3528.44	3380.67	3256.59	4013.64	3150.5	4100.8	2004.65	4728.99	4480.96	3852.91	4625.73	4003.16	3937.92	4560.87	3546.5	4538.91	4318.31
hsa-miR-151a-3p	4324.98	4330.02	4417.5	3486.15	5422.6	4359.1	5210.17	4727.05	4902.91	4671.3	4910.22	3982.29	5158.69	4082.93	3517.21	4931.6	4631.73	3845.99	4714.76	4965.6	4934.55	4045.53	5119.07	5381.9	5171.85	4820.62	4804.29	4153.88	4458.94	5413.58	4268.39	4070.92	4216.31	3902.6	4307.12	4187.98	3939.93	4410.97	3664.92	4186.68
hsa-miR-342-3p	3672.56	3049.2	3319.82	2389.86	2269.78	3224.79	2798.18	3086.26	3041.89	2793.15	2920.58	1964	3440.12	2523.65	3922.77	3006.05	2426.57	3221.76	3369.13	3234.35	3761	2679.68	3179.93	3436.94	3026.61	3733.74	3233.91	2807.27	3353.42	1338.54	3742.95	2424.18	3369.83	2647.59	3345.61	2922.81	2810.74	2902.33	3018.02	3121.87
hsa-miR-23b-3p	3300.54	3047.85	3681.25	2070.21	3379.32	2854.32	2579.28	3019.11	3739.89	3441.77	3088.57	2796.66	3961.06	3405.11	3122.84	2892.53	3355.02	3050.38	3263.12	3645.24	2971.85	3036.48	3204.83	3427.27	2764.22	2964.51	3195.07	2427.85	2420.63	3041.11	3206.33	2735.81	3502.64	3167.71	3066.47	3964.42	3527.2	2856.83	4071.55	3849.18
hsa-miR-194-5p	2978	4480.87	2936.08	2826.88	6073.66	4331.27	1707.87	2630.89	4448.23	1658.43	3354.56	2416.53	2796.22	4197.84	1897.76	2787.42	4897.43	4081.84	3817.16	2310.1	4788.21	3823.44	3618.43	2060.91	1972.01	3002.2	2991.8	1685.46	2304.32	2941.26	2081.65	1344.94	3317.29	3011.68	2911.39	3600.1	3356.96	804.607	2062.18	2563.31
hsa-miR-375-3p	2697.61	2907.78	1021.83	3663.45	917.687	562.205	551.812	1435.69	707.395	514.686	244.986	552.091	362.197	896.004	1853	285.89	1789.35	5926.22	2023.49	1023.54	7250.16	1812.02	648.546	2500.83	3244.1	7791.19	1528.51	269.761	6742.54	149.148	2490.83	1751.71	3231.19	1545.27	1542.54	1096.26	1404.76	1230.86	876.625	550.124
hsa-miR-99a-5p	2686.62	2369.06	1642.06	1880.42	2541.88	2084.3	2166.47	2018.03	2125	1714.11	1321.17	950.32	2039.03	1706.19	1718.75	1017.43	3023.27	2380.55	1661.35	2038.63	3322.89	2419.58	1909.91	2887.89	2247.67	3875.74	3136.52	1426.66	2885.88	731.838	1661.3	1941.97	1802.4	2468.06	1656.26	1624.52	2116.32	1958.84	3319.03	1263.94
hsa-miR-205-5p	2343.92	1398	1066.45	1201.17	627.354	1163.37	2051.61	2267.08	1062.5	1738.19	1678.15	651.648	1375.01	801.458	2341.08	1862.49	1390.8	1136.82	829.514	1242.19	1172.62	2141.48	1211.56	779.236	1708.35	766.534	2018.5	1891.62	1533.91	8967.86	500.849	1135	926.741	1562.04	1358.51	553.098	630.732	838.133	348.537	1009.12
hsa-miR-532-5p	2279.78	2593.97	2576.87	1238.63	5078.28	3887.81	3145.24	3547.73	3029.68	3187.44	2491.86	1248.99	4033.35	2656.01	1878.18	2034.86	3460.1	2217.03	2559.73	2616.42	3439.13	3127.18	2524.89	3988.82	2532.82	3366.29	4942.34	3046.33	1938.12	1354.97	2349.96	1699.22	2591.96	2776.78	2648.78	2722.43	2782.57	2401.85	2862.23	2531.25
hsa-miR-660-5p	2252.29	2607.44	1985.64	1071.32	3649.59	3859.98	2434.46	3402.45	1872.3	2975.25	1949.39	1194.69	3320.14	2516.37	2177.45	2329.16	4059.8	2404.14	2126.4	2183.34	2354.04	2910.43	2186	2551.42	1751.98	2983.36	4221.77	2828.1	1654.83	1581.23	2095.07	2286.41	2415.36	3498.24	2692.21	2611.48	2537.62	2538.34	2909.76	2090.81
hsa-miR-25-3p	2233.96	1826.29	2083.81	1940.36	2145.4	2096.05	2255.52	2308.59	2050.79	2060.25	1905.64	1420.96	2129.21	1697.46	2039	1904.53	2144.36	2356.97	2162.77	2140.03	3152.46	2082.79	2009.52	2592.34	2924.18	3090.36	2252.42	2614.27	2652.1	2458.42	1893.83	2056.78	2307.37	1964.72	2098.76	1713.94	1666.85	1824.73	1497.13	1824.18
hsa-miR-30e-3p	2100.18	2243.8	2795.52	1485.86	3470.87	2574.14	2515.2	2558.86	2425.62	2338.66	2638.85	1945.89	2820.81	2808.74	1834.82	2375.41	2249.44	1948.15	2640.21	2370.3	2190.56	2828.4	2672.14	2796.38	2253.99	2259.9	3383.48	2389.47	1810.29	1793.57	2765.85	2069.9	2406.61	2439.54	2410.99	2916.18	2745.83	2574.26	4731.66	2391.18
hsa-miR-34a-5p	2089.18	952.201	1024.06	1358.5	884.861	1519.62	1844.37	1469.88	1387.55	1765.28	1384.17	1384.75	1265.45	804.367	1945.3	1265.48	933.702	987.441	1033.02	1998.49	1717.71	1619.28	1029.66	876.427	1712.78	985.255	1183.55	2297.36	1729.68	2620.21	471.781	1361.35	1062.47	867.43	1089.7	637.553	847.508	866.868	211.235	1041.19
hsa-miR-28-3p	1975.56	1924.6	1842.86	1378.48	2215.8	1776.91	1992.52	2124.24	2170.1	1596.73	1720.15	1022.73	1927.24	1733.83	1240.46	1484.1	1833.63	1938.72	2097.77	1765.05	2833.37	1712.65	2031.17	2751.48	2728.18	2683.88	2281.24	1722.74	2030.25	2388.9	1600.93	1495.84	1885.59	1444.6	1712.09	1497.01	1741.55	1582.87	1592.18	1436.06
hsa-miR-24-3p	1768.48	1892.28	2083.81	1480.86	1813.49	1831.96	1739.5	1776.31	1963.42	1983.5	1795.4	1601.97	2018.17	1710.55	1997.05	1786.81	1982.99	1976.45	2334.56	2343.9	1972.43	1937.4	2089.64	2159.24	2050.41	1685.84	1740.89	1865.3	1563.85	3194.05	1905.01	1823.88	2003.8	1691.24	1699.69	1806.68	1871.38	1592.45	1660.83	1998
hsa-miR-196a-5p	1717.16	1529.99	2385	1553.28	2538.96	2107.19	1937.58	1876.41	2404.02	1714.11	1965.14	2760.45	2810.38	2407.28	1345.35	2736.97	2050.54	1715.44	2315.21	1620.34	1760.32	1869.37	2955.81	1636.91	1218.99	1312.33	1423.54	1392.67	1149.28	1684.87	1806.63	866.013	1997.97	1934.52	2191.81	2432.64	2220.42	1228.46	2136.11	1822.5
hsa-let-7d-5p	1700.67	1465.34	1630.91	1228.64	1520.24	1527.05	1394.93	1447.9	1416.67	1605.76	1494.41	1656.27	1553.12	1425.46	1707.56	1585.01	1398.3	1556.64	1683.79	1791.46	1378.25	1347.18	1825.46	1583.48	1229.11	1325.79	1557.03	1644.88	1392.27	1610.3	1444.41	1492.56	1513.43	1342.25	1428.81	1571.53	1729.31	1551.74	1687.24	1647
hsa-miR-9-5p	1651.19	3214.86	1990.11	1510.83	1747.47	2901.94	2558.48	2510.02	2367.38	2407.89	2269.62	2814.76	1527.04	1332.37	1847.41	2598.23	2207.41	1990.61	3301.03	2651.28	1645	2541.63	3074.91	4660.07	2905.85	1764.58	1871.05	3007.95	1118.19	2028.67	2481.88	2184.72	1011.39	2008.34	1763.79	988.621	1975.48	3005.3	1193.48	1404
hsa-miR-190a-5p	1642.03	2095.65	1713.45	1423.43	1494.34	1859.79	1890.98	1799.5	1991.6	1623.82	2631.85	2534.19	1715.59	1982.55	1064.25	2139.97	2342.51	1248.45	1814.56	2018.56	1088.33	1513.91	2937.4	1171.98	2040.92	985.928	1364.68	1471.62	1100.92	1808.74	1844.64	2693.17	1215.71	2758.33	1217.9	1641.08	1878.72	2547.92	990.163	1404
hsa-miR-148b-3p	1618.2	1402.04	1546.12	1880.42	1447.29	1464.58	1365.8	1180.54	1439.22	1417.64	1480.42	1538.61	1275.14	1489.46	1444.64	1500.92	1516.89	1405.69	1577	1502.04	1506.53	1682.64	1212.64	1564.16	1440.28	1497.4	1694.17	1402.54	1703.2	1820.12	1413.11	1321.98	1593.7	1380.84	1546.67	1672.54	1387.61	1278.75	1563.14	1427.62
hsa-miR-23a-3p	1464.26	1690.26	1871.86	961.438	1569.48	1669.3	2094.06	1736.02	1691.92	1896.21	1676.4	1339.5	1783.41	1182.55	1769.09	1278.1	1656.5	1941.86	2392.59	2516.07	1617.68	1852.03	2127.53	2455.36	2496.78	1554.6	1564.62	2215.11	1484.39	4152.14	1793.22	1617.21	1326.63	1753.32	1310.95	1220.46	1440.27	1693.03	1174.99	1407.37
hsa-miR-361-5p	1394.62	1225.61	1166.84	759.161	1360.48	1505.4	1364.13	1191.53	1279.51	1217.49	1021.94	778.358	1300.48	926.55	1285.22	1055.27	1183.64	1416.7	1332.48	1409.08	1506.99	1371.18	1268.94	1462.99	1405.5	1344.63	1378.33	1412.41	1266.75	1023.81	1196.22	1236.69	1230.3	1253.33	1207.56	1106.2	1135.32	1149.44	1021.85	1208.25
hsa-miR-30b-5p	1339.64	1656.59	1555.05	776.642	3070.75	2227.17	1393.26	1765.32	1544.43	1459.78	1256.43	796.459	1655.22	1495.28	1331.37	1147.76	1654.99	1363.24	1885.75	1409.08	2300.32	1932.73	1572.1	2059.77	1410.56	2339.31	2429.6	2107.65	1144.68	827.9	1370.63	1062.83	1431.7	1649.29	1668.67	1414.21	1488.04	1637.95	2239.09	1328.06
hsa-miR-182-5p	1304.82	1391.26	1452.42	1952.84	2006.8	1363.15	2912.2	2414.8	1566.98	1611.78	1902.14	1393.8	1949.6	2026.19	1194.31	1568.19	1621.97	1827.08	1282.96	2236.16	2335.52	1441.21	2941.73	2289.96	3344.63	2337.29	2497.87	1541.8	1698.59	3460.75	1408.64	1377.75	1795.1	1305.34	1178.62	1578.15	2350.24	2150.41	3590.99	1226.81
hsa-miR-221-3p	1260.84	952.201	1381.03	481.967	3244	1820.83	2671.67	1584.64	1237.24	1560.61	1086.69	814.56	2311.8	1533.1	1054.46	1093.11	1295.47	1055.05	1359.57	972.839	939.209	1467.22	1306.84	1283.38	1346.07	1271.28	3384.7	1356.48	785.382	3080.29	1352.74	1659.86	1590.78	1374.13	1184.82	1316.5	1761.15	1652.32	2080.66	1328.06
hsa-miR-186-5p	1182.04	1194.63	1003.98	968.929	1326.93	1255.53	1146.07	1154.9	1125.44	1223.51	920.447	678.8	1070.19	897.459	1074.04	933.346	1299.23	1185.56	1337.13	1183.04	1729.29	1204.46	1044.82	1366.93	1370.73	1528.36	1490.59	1377.32	1126.25	1186.87	925.676	1016.91	1147.12	1154.34	1081.43	1122.75	924.665	1072.81	1151.23	995.623
hsa-miR-95-3p	1150.88	954.895	1880.78	674.255	761.214	736	512.694	909.517	1199.66	1240.06	1256.43	1547.66	1957.8	1202.91	1788.67	836.648	1188.89	1014.17	1994.08	2208.69	818.798	650.246	1475.74	1742.06	806.758	1011.5	641.078	844.374	582.703	485.364	1147.03	1174.37	1403.98	998.299	541.75	1268.48	830.362	876.447	792.131	1960.87
hsa-miR-423-5p	1095.91	953.548	1119.99	851.559	827.961	896.807	1165.21	944.921	1136.72	1188.89	1282.68	1366.65	1236.39	955.641	1011.11	1202.42	995.999	979.579	1084.87	977.064	737.288	951.693	1252.7	1163.45	1050.81	814.316	975.725	888.237	903.995	822.844	1126.91	1066.11	1088.74	1030.18	1097.97	1112.82	1358.22	1113.52	1248.93	1206.56
hsa-miR-425-5p	1094.07	616.843	526.53	609.327	620.788	687.139	901.376	695.872	630.361	609.497	533.719	615.446	724.393	500.366	882.449	794.605	671.005	776.745	562.553	633.771	621.971	768.957	687.523	536.542	780.836	570.694	665.956	880.561	734.712	1449.77	487.433	777.444	637.773	711.393	891.199	465.331	504.585	565.141	422.47	767.811
hsa-miR-320a-3p	1090.41	845.803	972.742	476.973	709.42	835.576	1117.77	1002.3	1031.5	1136.22	978.194	742.155	1044.11	766.549	966.359	807.218	931.45	993.731	887.549	1018.26	748.403	799.635	1041.57	1159.48	1064.09	736.25	773.359	841.084	750.834	1390.37	1008.4	1194.05	818.743	1110.71	779.54	877.67	950.384	998.575	543.93	1027.69
hsa-miR-31-5p	1028.1	783.849	709.477	539.404	1519.14	1105.24	1548.9	1070.67	1095.38	874.364	873.2	597.344	667.008	475.638	1352.34	756.767	1001.25	844.357	1127.43	1403.8	933.188	1487.23	1142.26	1369.2	1855.67	738.942	898.662	1463.95	740.47	6437.39	503.085	872.574	509.343	924.475	421.82	486.858	622.159	739.951	187.471	511.312
hsa-miR-22-3p	976.785	690.918	698.322	684.244	756.107	756.41	758.221	539.606	690.485	594.447	587.966	914.118	697.564	731.64	950.976	567.575	859.396	836.495	761.419	867.21	559.913	807.638	636.636	559.845	684.733	681.065	748.784	797.221	629.918	1253.86	534.388	810.247	712.204	659.381	595.511	647.488	631.957	522.037	638.985	745.874
hsa-miR-361-3p	868.661	852.537	765.254	641.791	929.724	818.877	983.773	892.426	995.802	778.049	776.955	434.432	1026.97	670.548	637.713	702.111	857.895	690.265	689.456	932.7	1040.17	808.305	862.923	1010.56	1007.82	878.923	1019.41	685.368	865.993	1159.06	635.004	649.51	757.446	892.597	672.018	620.993	642.979	864.474	683.873	617.624
hsa-miR-128-3p	859.497	1140.76	1035.21	786.631	1468.81	1069.98	1127.76	1141.47	1116.05	991.749	1058.69	850.763	1196.89	919.277	861.472	945.958	1275.21	1058.2	981.179	1158.75	1453.27	969.033	1055.65	1051.49	1198.12	1066.01	1072.51	1048.34	1110.13	1284.19	869.777	675.753	1017.23	946.287	978.044	1202.24	813.215	811.791	726.12	862.311
hsa-miR-183-5p	852.167	829.641	905.81	1028.86	1109.54	854.75	1675.41	1430.81	928.162	988.739	995.693	950.32	1224.46	1179.64	735.608	1030.04	959.972	1073.92	762.967	1345.71	1194.85	891.003	1582.93	1336.81	1839.86	1205.32	1492.71	1060.4	996.122	2009.71	762.453	833.21	1050.79	703.004	680.289	1020.08	1338.62	1376.93	2107.07	815.061
hsa-miR-1307-3p	788.025	332.664	352.508	349.614	475.986	572.101	566.793	594.544	780.671	510.171	647.463	642.598	511.994	568.73	478.285	483.49	460.096	515.734	489.816	448.921	341.32	574.884	566.259	486.525	431.198	234.2	422.025	551.585	313.232	845.595	384.58	413.324	404.263	407.709	529.343	513.354	371.091	313.701	435.672	561.937
hsa-miR-934	729.382	235.693	216.413	272.199	202.431	361.197	494.384	384.561	295.922	382.252	321.982	226.267	258.605	196.365	523.037	315.319	313.736	250.005	235.235	373.925	123.19	273.437	295.581	199.498	361.018	198.532	318.87	571.323	375.417	171.9	212.413	485.492	253.942	315.429	347.381	178.846	159.214	330.464	71.2918	361.124
hsa-miR-27a-3p	725.716	995.3	854.496	659.271	837.809	747.133	892.221	799.643	869.917	821.692	794.454	823.611	802.646	660.367	746.795	723.133	845.886	709.134	1101.89	1081.64	781.285	997.043	844.517	1248.14	1358.09	784.705	796.417	1116.33	644.888	3531.53	818.351	1052.99	640.692	927.831	587.24	692.2	640.53	850.106	480.559	707.061
hsa-miR-339-5p	723.884	738.057	566.689	534.409	592.339	541.176	634.209	789.876	580.571	766.009	566.968	352.976	686.385	541.093	530.029	479.286	743.809	638.378	448.804	727.781	759.518	706.267	499.131	902.004	819.403	887.672	777.606	524.17	570.035	340.008	485.197	652.79	499.127	914.409	554.156	495.138	443.349	593.877	483.2	524.812
hsa-miR-181a-5p	689.064	385.19	381.511	349.614	450.09	518.292	645.029	462.694	604.997	577.893	430.475	443.483	471.005	407.275	474.089	521.328	589.944	531.457	372.198	479.554	303.807	478.848	597.658	438.782	541.211	380.239	467.231	529.653	489.424	449.973	442.714	583.903	396.966	545.29	556.224	486.858	499.687	335.253	200.673	551.812
hsa-miR-29c-5p	689.064	622.231	479.678	409.547	575.196	509.634	533.501	512.748	573.056	475.558	474.223	398.229	537.333	429.093	567.788	462.469	585.44	520.451	501.423	558.775	544.63	560.879	511.041	498.461	558.282	581.462	625.908	651.374	527.427	452.501	433.771	505.174	459.722	563.745	490.056	418.963	360.068	409.488	462.076	426.937
hsa-miR-140-3p	685.399	849.843	660.394	344.619	1012.52	688.995	659.178	893.647	1040.89	913.492	855.701	352.976	1048.58	804.367	632.119	390.996	1179.89	636.805	603.564	879.886	922.073	887.002	650.711	1239.62	848.487	1024.29	1248.78	523.073	545.852	551.09	465.074	662.631	647.989	647.636	494.191	523.29	766.676	754.319	657.468	674.999
hsa-miR-100-5p	672.571	663.982	332.428	437.017	1028.57	771.872	649.19	560.36	686.727	442.449	426.976	316.773	907.728	631.276	475.488	214.417	845.135	616.365	374.519	406.67	711.354	488.184	519.703	341.591	319.921	574.059	536.102	518.687	515.911	183.275	342.097	426.446	443.668	513.411	622.392	483.546	503.361	335.253	554.491	558.562
hsa-miR-363-3p	646.914	743.444	394.898	784.133	693.737	710.642	312.111	589.66	316.59	310.016	300.983	262.469	488.146	295.274	489.473	403.609	621.467	1234.3	619.814	390.826	1145.76	818.976	375.702	604.178	703.701	1370.88	455.095	330.073	1426.82	307.144	485.197	567.501	808.527	647.636	773.337	488.514	519.282	526.826	345.897	415.124
hsa-miR-98-5p	643.249	536.034	595.693	891.515	588.691	603.025	518.52	553.035	564.601	604.982	666.712	1095.13	614.095	626.912	606.946	840.852	553.166	575.483	633.742	543.987	533.978	599.56	645.298	570.076	471.031	497.339	542.17	656.857	438.754	750.797	579.106	508.455	556.044	459.721	808.489	673.984	609.912	557.957	488.481	654.749
hsa-miR-152-3p	641.416	791.93	1095.45	516.929	974.951	744.659	710.78	780.11	707.395	695.278	790.955	579.243	708.743	635.639	585.969	529.737	772.331	952.849	1406.77	772.145	547.409	687.593	1424.85	968.503	657.546	557.235	727.546	575.709	550.458	736.894	997.225	590.464	631.935	838.907	634.798	794.871	639.305	1020.13	628.424	600.749
hsa-miR-30c-2-3p	613.927	814.826	765.254	374.586	1136.9	969.788	761.55	904.634	884.009	877.374	825.953	678.8	946.481	692.367	637.713	681.09	818.866	633.661	944.036	917.912	753.961	875.664	1044.82	969.64	766.926	686.448	846.781	750.067	429.542	425.958	807.171	590.464	678.637	709.715	645.137	725.32	761.777	708.821	631.064	701.999
hsa-miR-19b-3p	613.927	781.155	488.602	576.863	675.135	747.751	426.135	654.364	381.411	611.001	570.467	371.077	476.967	545.457	625.127	500.307	915.689	669.825	658.504	443.64	1047.58	754.285	423.341	583.148	575.353	1014.19	851.939	638.215	673.678	479.044	529.916	619.987	709.285	642.603	659.611	611.057	480.091	469.354	747.243	494.437
hsa-miR-378a-3p	610.262	514.485	332.428	309.658	694.101	649.412	381.191	412.64	748.73	376.232	447.974	289.621	447.902	452.366	351.022	386.792	680.762	654.101	453.447	453.146	596.963	444.168	424.424	384.787	500.114	450.229	469.052	324.59	406.51	1531.93	198.998	367.4	404.263	416.098	425.956	493.482	456.821	201.152	150.505	401.624
hsa-miR-20a-5p	593.768	540.075	513.144	302.166	579.937	739.711	530.172	526.177	439.656	436.43	360.479	425.381	490.382	446.547	640.51	672.682	492.37	844.357	738.205	444.696	545.556	681.591	578.169	579.17	463.443	574.059	627.425	765.419	498.637	371.607	570.162	659.351	650.908	657.703	686.492	635.897	622.159	433.434	570.334	629.436
hsa-miR-744-5p	593.768	402.699	441.75	539.404	347.962	405.109	515.191	421.186	545.812	573.378	437.475	615.446	466.533	402.911	516.044	563.371	462.348	429.254	426.364	502.792	444.133	431.496	433.086	491.64	605.701	493.301	422.632	456.181	662.162	422.166	397.996	544.539	553.126	400.998	510.733	435.523	489.889	399.909	298.369	548.437
hsa-miR-10a-3p	591.935	595.294	577.845	252.221	1156.59	892.477	814.817	849.697	782.55	717.851	586.216	407.28	677.442	568.73	598.555	433.039	769.328	473.28	730.467	869.323	759.055	782.962	742.742	1139.58	1080.53	859.406	1120.14	852.05	525.123	341.272	621.589	610.146	521.018	563.745	550.021	577.937	585.417	672.901	662.749	531.562
hsa-miR-196b-5p	568.111	564.317	577.845	846.564	418.722	372.948	348.732	441.94	458.445	498.132	540.719	914.118	540.314	519.275	629.322	575.984	546.411	625.799	586.541	486.948	703.48	568.882	616.064	592.81	466.605	926.705	449.027	370.647	740.47	1123.67	704.318	515.015	755.987	454.688	622.392	662.392	642.979	490.906	572.974	634.499
hsa-miR-335-5p	551.618	930.652	622.466	751.669	2386.86	2146.77	1054.52	1007.18	724.305	770.524	418.226	805.51	1632.87	368.002	1269.83	689.499	1728.55	1083.36	887.549	1403.8	2476.77	926.35	1148.76	879.838	968.616	1546.53	808.249	596.545	601.128	653.472	581.342	377.241	917.984	397.642	1021.47	1053.2	957.733	577.114	271.965	420.187
hsa-miR-135a-5p	549.785	483.508	203.026	771.647	372.4	338.931	147.316	228.295	276.194	236.274	246.736	280.571	174.391	440.729	321.653	340.545	505.88	905.679	258.449	177.456	684.029	420.826	237.114	247.81	292.102	873.539	287.924	163.392	809.565	260.378	351.041	350.998	464.1	414.42	312.23	462.019	322.102	160.443	227.077	195.75
hsa-miR-574-3p	547.953	464.653	539.917	584.354	344.68	309.244	392.011	479.786	447.171	547.794	565.218	443.483	457.59	421.82	454.51	378.383	406.806	539.319	571.065	491.173	657.631	399.484	372.454	624.639	563.34	494.647	476.94	404.642	543.549	554.882	487.433	488.773	554.585	421.131	372.194	475.266	342.922	505.274	512.244	399.937
hsa-miR-149-5p	547.953	498.323	432.826	486.962	137.507	178.743	243.863	206.32	260.224	404.826	218.737	208.165	182.589	176.001	405.563	193.396	304.729	512.589	286.306	336.955	643.275	88.7002	189.475	314.309	595.585	696.543	248.179	343.233	377.72	286.921	380.108	455.969	408.642	288.584	275.01	170.566	265.765	189.178	95.0557	280.125
hsa-miR-146a-5p	500.305	911.797	542.148	596.84	1471	758.266	883.898	1255.01	1011.77	650.13	936.196	488.736	570.87	520.73	461.503	714.724	812.111	978.007	772.253	693.979	1925.66	4339.64	1331.74	765.595	727.094	595.595	516.988	323.494	3011.4	37366.7	290.671	111.532	1093.12	387.575	1102.11	609.401	642.979	1242.83	359.099	410.062
hsa-miR-187-3p	496.639	332.664	742.943	264.707	981.517	654.36	481.067	712.964	600.299	498.132	540.719	325.824	723.648	1250.91	250.33	601.209	601.953	298.748	399.281	308.435	278.799	786.297	448.244	420.594	280.722	371.49	1692.35	498.948	420.329	647.152	858.598	567.501	1065.39	671.126	616.188	794.871	830.362	921.946	1695.16	796.499
hsa-miR-146b-5p	481.978	518.525	430.595	392.067	942.49	616.013	421.974	460.252	544.873	460.508	404.227	226.267	474.731	436.366	387.383	365.771	721.292	592.779	663.921	456.315	888.729	575.551	453.657	513.807	396.424	577.424	599.209	479.21	323.596	380.455	319.738	285.391	510.802	345.63	556.224	577.937	443.349	277.781	435.672	379.687
hsa-miR-10b-3p	472.815	627.618	655.932	297.172	992.094	907.321	708.283	701.977	732.76	556.824	514.471	371.077	722.903	498.911	468.495	525.532	761.823	589.635	717.313	693.979	652.074	792.299	829.359	752.523	708.126	695.87	758.492	781.868	450.27	350.119	675.251	534.698	623.178	639.247	665.814	731.944	634.406	677.69	528.087	546.749
hsa-miR-107	467.317	412.127	281.114	309.658	553.676	468.813	397.837	401.653	498.84	449.974	407.727	126.709	339.094	334.547	377.593	323.728	556.168	394.662	372.198	389.769	460.342	424.827	375.702	310.899	410.334	416.58	460.86	403.545	409.965	238.89	207.942	341.157	398.426	325.496	349.449	319.604	340.473	220.309	163.707	325.687
hsa-miR-423-3p	458.154	370.375	406.053	354.608	362.917	398.306	499.377	330.845	473.476	457.499	348.23	479.685	438.959	254.547	374.796	462.469	433.076	479.569	366.781	414.064	344.562	440.833	373.536	406.385	477.985	379.566	402.608	370.647	406.51	315.992	371.165	419.885	401.344	424.487	370.127	326.228	453.147	380.752	430.391	453.937
hsa-miR-20b-5p	441.661	649.167	305.655	476.973	774.709	678.481	298.794	689.768	256.466	356.668	286.984	208.165	386.045	225.456	391.578	344.749	564.424	974.862	529.279	292.591	1724.66	665.585	367.04	617.25	587.998	1403.85	571.903	336.653	1051.4	221.195	304.087	357.558	769.122	481.533	442.498	311.324	384.563	452.592	205.954	264.937
hsa-miR-374a-5p	434.33	367.682	345.814	442.012	293.616	312.336	274.658	279.57	291.225	335.599	372.729	561.142	295.123	477.093	502.059	374.179	506.631	429.254	502.97	327.448	370.96	520.863	397.356	388.197	305.38	425.329	425.363	372.84	293.655	633.248	424.827	551.099	326.913	422.809	465.243	486.858	533.979	419.066	612.581	553.499
hsa-miR-328-3p	417.837	470.04	629.159	439.514	251.306	492.316	476.073	517.631	448.111	573.378	624.714	416.331	649.867	618.185	443.322	580.188	594.447	528.313	606.659	419.345	136.158	472.845	614.982	450.718	385.044	220.067	381.673	383.806	415.723	265.433	630.533	475.651	468.478	577.168	456.972	606.089	547.451	514.853	689.154	499.499
hsa-miR-424-5p	403.176	408.086	504.22	397.061	460.303	496.645	164.795	395.549	349.47	472.548	437.475	543.04	495.598	541.093	999.923	361.566	510.384	237.426	490.589	539.762	181.08	328.791	323.732	283.049	135.303	255.736	344.356	349.812	291.351	413.318	310.794	606.865	507.883	453.01	363.923	364.316	372.316	572.325	385.504	588.936
hsa-miR-532-3p	403.176	461.959	493.064	257.216	478.54	600.551	458.595	592.102	429.322	582.408	453.224	280.571	640.179	426.184	378.992	445.652	487.116	383.656	452.673	392.938	346.414	432.163	532.695	484.82	359.754	384.95	581.612	470.437	317.838	226.25	465.074	364.119	421.776	585.557	645.137	493.482	562.147	481.328	377.582	469.124
hsa-miR-1-3p	368.356	17.5087	40.1591	44.9503	6.20059	8.65882	14.9813	12.2083	14.0915	30.0986	19.2489	181.013	17.141	55.273	12.5864	71.4724	15.0113	23.5854	33.2734	44.364	7.87305	5.33535	17.3234	5.6837	5.05805	74.0288	3.94416	10.9659	14.9706	56.8786	109.561	39.3642	30.6481	38.5897	37.2194	140.758	12.2472	43.104	150.505	64.1249
hsa-miR-224-5p	366.523	352.867	412.746	464.487	245.835	222.037	351.229	548.152	273.376	465.023	458.474	642.598	266.803	212.365	737.006	315.319	189.142	243.716	283.211	514.411	273.704	426.828	433.086	263.156	579.146	183.053	219.659	346.522	389.236	4868.81	158.751	328.035	334.21	186.237	372.194	253.365	356.394	265.808	137.303	318.937
hsa-miR-500a-3p	364.691	465.999	327.966	204.774	755.013	708.787	531.005	560.36	446.232	538.765	204.738	162.912	672.97	394.184	331.443	353.158	582.438	339.629	403.924	477.441	255.18	458.173	453.657	595.084	445.108	550.505	645.629	540.619	344.324	221.195	301.851	275.55	318.157	395.964	469.378	417.307	368.641	354.41	256.122	357.749
hsa-miR-584-5p	359.193	64.6473	205.258	192.288	63.8296	121.224	260.508	109.875	180.372	188.116	225.737	280.571	147.562	91.6368	275.503	239.643	82.5621	86.4797	75.0586	157.387	43.5334	112.042	63.8801	33.5339	130.877	57.877	74.939	220.414	200.376	169.372	107.325	370.68	143.025	90.602	295.688	99.3588	115.124	105.365	23.7639	236.25
hsa-miR-3182	355.528	206.063	296.731	399.558	102.492	309.862	265.502	327.182	179.432	419.875	152.241	244.368	190.787	90.1822	749.592	201.804	135.102	202.834	129.998	226.045	137.084	119.378	144.001	125.042	202.322	224.105	88.5919	256.602	217.65	173.164	118.504	164.018	106.539	112.414	281.214	173.878	56.3372	184.389	60.73	231.187
hsa-miR-151a-5p	333.536	280.138	298.962	319.647	354.163	263.476	332.086	349.157	390.805	347.639	356.98	452.533	359.216	289.456	205.579	319.524	285.214	279.88	379.162	341.18	356.14	280.106	378.95	408.658	367.341	305.537	311.589	308.142	274.078	274.281	389.052	311.634	332.751	295.295	355.652	304.7	296.383	320.885	253.482	298.687
hsa-miR-185-5p	333.536	233	283.345	242.232	466.868	338.931	323.763	313.753	283.71	329.58	215.238	217.216	324.934	277.819	346.826	214.417	309.983	319.189	327.318	274.634	348.267	302.114	266.348	297.258	281.986	366.779	408.069	305.948	299.412	410.79	223.593	232.905	293.346	218.116	268.807	291.453	203.304	239.466	232.358	249.75
hsa-miR-598-3p	331.704	239.734	263.265	359.603	289.239	259.765	267.167	223.412	231.101	225.739	234.487	307.723	243.7	180.364	222.36	189.192	258.945	207.551	217.438	278.859	284.819	236.756	197.054	295.553	268.076	324.381	266.686	394.772	291.351	270.489	216.885	262.428	230.591	219.794	283.281	259.989	230.248	191.573	274.605	239.625
hsa-miR-345-5p	320.708	290.913	174.023	97.3924	225.774	225.129	272.161	279.57	279.012	296.471	237.986	117.659	294.378	244.365	219.563	201.804	299.475	226.42	205.831	346.462	356.14	316.119	218.708	250.651	394.528	317.651	294.902	234.67	241.833	223.722	156.515	213.223	153.241	234.894	192.3	157.318	165.337	148.469	153.145	189
hsa-miR-200b-5p	318.875	235.693	218.644	227.249	221.398	222.037	361.216	249.049	248.011	242.294	250.236	135.76	254.879	157.092	248.932	264.868	218.414	268.873	266.187	298.929	296.86	238.09	279.34	280.775	350.27	277.944	246.662	276.341	356.992	494.212	279.491	272.269	272.914	270.128	275.01	221.901	328.226	232.282	163.707	298.687
hsa-let-7d-3p	317.043	336.705	392.667	199.779	190.03	290.071	301.291	317.415	285.588	386.767	428.725	325.824	345.056	352.002	307.669	399.405	267.951	257.867	396.186	278.859	147.272	280.773	393.025	284.185	226.98	129.887	240.897	325.687	202.679	324.84	395.76	390.362	325.454	377.508	277.078	375.908	353.945	402.304	417.189	393.187
hsa-miR-542-3p	315.21	242.427	272.189	242.232	729.481	463.866	165.627	303.986	439.656	297.976	267.735	244.368	608.133	366.547	569.187	197.6	412.81	243.716	477.435	387.657	285.282	283.44	358.378	253.493	164.386	335.148	474.209	325.687	256.804	188.331	239.245	239.466	391.128	270.128	332.907	448.771	347.821	196.362	234.999	425.249
hsa-miR-455-5p	300.549	140.069	113.784	189.79	226.504	230.696	205.577	151.383	125.884	145.978	104.994	81.456	144.581	145.455	124.466	227.03	159.87	172.959	192.676	107.741	185.711	153.391	207.881	119.926	141.625	90.1805	128.944	194.096	154.313	125.133	129.684	173.859	138.646	149.325	134.404	203.686	117.573	93.3919	47.5278	167.062
hsa-miR-135b-5p	289.554	210.104	232.03	202.276	320.607	188.02	575.116	366.249	269.618	311.52	316.732	443.483	146.816	174.546	260.12	344.749	270.954	303.465	218.985	387.657	166.723	188.738	423.341	204.613	641.107	146.039	147.451	260.988	279.835	709.087	185.582	656.071	137.187	370.797	128.2	112.607	184.933	397.514	97.6961	124.875
hsa-miR-891a-5p	271.227	67.341	165.098	69.9227	687.901	179.361	156.472	86.6788	132.46	434.925	313.232	190.064	364.433	333.092	120.27	184.987	273.205	15.7236	260.771	13.7317	993.857	292.11	111.52	171.08	24.0257	169.593	1618.62	115.142	13.819	109.965	69.3139	291.951	485.992	114.091	163.352	409.027	602.563	536.405	1639.71	210.937
hsa-miR-141-5p	267.562	192.595	138.326	309.658	140.79	160.188	195.589	155.045	150.31	174.572	180.24	190.064	140.854	186.183	181.804	222.826	181.637	199.69	144.701	157.387	242.675	164.729	146.166	167.669	217.496	249.006	193.264	193	291.351	480.308	194.526	265.709	242.266	156.037	192.3	147.382	149.416	189.178	137.303	194.062
hsa-miR-200a-5p	263.897	239.734	194.102	184.796	260.789	211.523	271.328	249.049	217.01	227.244	241.486	108.608	214.635	138.182	209.774	130.332	239.43	213.841	199.64	253.508	276.02	242.758	221.956	256.335	316.128	271.887	269.72	271.954	239.53	444.917	176.639	236.185	210.159	208.049	215.046	180.502	143.292	198.757	137.303	219.375
hsa-miR-3065-5p	263.897	339.398	303.424	412.045	457.385	333.983	754.06	266.141	445.293	379.242	332.481	343.925	172.9	405.82	184.601	260.664	504.379	221.703	493.685	571.45	428.387	276.771	349.717	671.814	683.468	408.504	189.926	267.568	454.877	1236.16	290.671	239.466	251.023	442.943	208.842	218.589	345.372	174.81	129.381	172.125
hsa-miR-454-3p	251.069	255.896	392.667	267.205	371.671	348.827	282.148	286.895	292.164	282.927	320.232	289.621	338.348	280.729	331.443	348.954	315.237	418.247	410.114	324.28	344.562	347.465	424.424	375.125	276.928	296.115	344.356	358.585	244.136	466.405	326.446	275.55	340.048	303.684	337.043	425.587	344.147	294.544	367.021	266.625
hsa-miR-32-5p	245.571	208.757	189.64	249.724	117.811	152.148	142.323	153.824	164.401	145.978	195.989	208.165	133.402	189.092	170.616	260.664	234.927	171.387	215.89	152.105	164.871	200.076	147.249	175.626	147.316	219.394	150.485	180.937	114.007	441.125	178.875	268.989	214.537	216.438	155.081	208.654	184.933	167.627	213.875	209.25
hsa-miR-874-3p	240.073	195.289	252.11	92.3979	337.75	194.824	222.223	253.932	186.948	285.937	192.489	126.709	258.605	206.546	159.428	163.966	204.904	136.795	150.117	203.863	69.9312	266.767	177.565	178.468	241.522	151.422	317.96	153.523	137.039	88.4778	185.582	114.812	213.077	296.973	173.691	182.158	219.225	227.493	248.201	254.812
hsa-miR-96-5p	238.24	154.884	122.708	227.249	185.288	150.292	302.123	216.087	157.825	179.087	169.74	235.317	181.844	237.092	190.195	201.804	211.659	245.288	172.557	210.201	283.43	220.75	213.295	222.801	336.992	301.499	310.375	161.199	263.713	481.572	127.448	216.503	233.509	176.17	142.674	203.686	295.158	325.674	536.008	182.25
hsa-miR-99b-3p	234.575	259.936	156.174	159.823	235.622	212.76	297.962	277.128	319.408	251.323	281.734	171.963	241.464	196.365	180.406	193.396	230.423	152.519	174.879	302.098	238.044	236.756	227.37	317.719	315.496	184.399	245.752	219.318	200.376	187.067	147.571	190.26	180.97	199.66	163.352	168.91	206.978	213.125	134.662	202.5
hsa-miR-1307-5p	221.747	79.4623	69.1629	92.3979	145.167	123.079	124.012	108.654	161.583	76.7514	94.4946	135.76	85.705	101.819	99.293	50.4511	126.095	135.223	156.308	88.728	90.7717	140.72	105.023	99.4648	116.335	78.0667	106.796	150.233	84.0658	123.869	62.6061	111.532	94.8632	93.9576	107.523	112.607	56.3372	71.8399	110.898	89.4373
hsa-miR-181a-2-3p	218.081	259.936	203.026	127.359	253.859	274.608	319.601	319.857	277.134	316.035	236.236	108.608	239.229	177.455	209.774	227.03	291.219	238.999	215.89	278.859	175.06	244.092	358.378	336.475	253.535	220.74	206.917	354.198	146.251	120.077	257.132	196.821	135.727	218.116	179.894	218.589	231.472	217.914	139.943	216
hsa-miR-218-5p	212.584	226.266	336.89	129.856	345.045	414.387	155.639	140.395	265.86	158.018	271.234	244.368	250.408	558.548	163.624	290.094	341.507	207.551	304.877	156.33	189.88	332.792	249.024	239.284	124.554	214.683	454.185	129.398	140.494	185.803	178.875	190.26	391.128	194.626	258.468	465.331	491.114	378.357	1021.85	418.499
hsa-miR-501-3p	205.253	206.063	174.023	72.42	255.318	287.597	245.527	236.841	224.525	245.304	188.989	72.4054	314.5	154.183	177.609	134.536	231.174	202.834	173.331	188.019	122.727	216.749	212.212	229.053	186.515	144.693	267.596	208.352	125.523	82.158	190.054	127.934	163.457	224.827	243.994	183.814	205.753	172.416	142.584	195.75
hsa-miR-340-5p	205.253	268.017	236.492	202.276	220.303	202.245	153.975	184.345	239.556	219.72	195.989	171.963	210.909	279.274	211.173	248.051	236.428	161.953	287.08	172.175	184.322	308.783	251.19	310.899	202.322	202.57	233.009	254.409	163.525	262.906	234.773	246.026	221.834	226.505	229.52	220.245	188.607	225.098	322.133	227.812
hsa-miR-130a-3p	199.755	226.266	283.345	164.818	220.303	265.95	203.912	245.387	257.405	285.937	229.237	244.368	249.662	196.365	230.751	201.804	281.462	240.571	316.484	272.522	229.708	268.101	328.062	386.492	236.464	204.589	245.752	300.466	173.89	142.828	295.143	226.344	268.536	256.706	221.249	230.181	251.068	258.624	176.909	227.812
hsa-miR-4516	199.755	96.971	62.4697	237.238	32.8266	45.7681	88.2233	89.1205	69.5182	164.037	61.2465	72.4054	47.6967	94.5459	60.1352	37.8383	80.3104	92.7692	54.166	85.5591	122.264	69.3595	54.1357	69.9096	132.141	167.574	37.6212	49.3465	249.894	37.9191	105.089	68.8874	110.917	130.869	86.8453	77.8311	22.045	67.0506	52.8087	35.4374
hsa-miR-365a-3p	192.425	145.456	136.095	102.387	154.285	141.015	163.962	142.837	158.765	194.136	113.743	63.3547	130.421	129.455	151.037	117.719	126.845	215.413	170.236	188.019	232.95	108.041	164.573	168.238	217.496	242.949	231.795	148.04	232.62	42.9749	116.268	137.775	215.996	151.003	134.404	101.015	106.551	126.917	142.584	97.8748
hsa-miR-126-3p	188.76	343.439	484.14	259.713	416.898	366.763	548.483	208.762	305.317	207.68	388.478	235.317	359.216	610.912	289.488	302.707	327.246	311.327	379.936	503.848	328.816	366.805	350.799	676.929	435.624	448.883	476.94	105.273	358.143	222.459	234.773	262.428	440.749	260.061	316.365	715.384	627.058	414.277	974.321	491.062
hsa-miR-664a-5p	186.927	187.208	236.492	179.801	220.668	187.402	263.838	249.049	232.98	231.759	232.737	190.064	256.37	173.092	160.827	222.826	187.641	169.815	191.129	218.651	185.248	152.057	245.776	244.399	180.193	182.38	202.062	164.488	203.831	108.701	198.998	173.859	224.753	181.204	223.317	215.278	225.349	232.282	184.83	183.937
hsa-miR-15b-5p	175.931	183.167	153.943	182.299	232.704	179.98	257.179	249.049	296.862	257.343	188.989	153.861	221.342	120.728	195.789	121.924	192.895	182.394	215.116	248.227	263.979	245.426	180.813	293.848	294.631	263.812	248.179	232.477	198.073	319.784	167.695	180.419	153.241	152.681	124.065	134.134	117.573	210.73	132.022	143.437
hsa-miR-502-3p	172.266	164.312	180.716	82.4089	288.145	293.782	248.856	249.049	220.767	249.818	195.989	108.608	274.256	165.819	170.616	138.741	250.689	154.091	169.462	170.062	207.015	258.764	187.31	254.062	201.057	189.783	330.399	198.483	101.34	112.493	136.392	137.775	132.809	213.082	237.791	170.566	194.731	203.546	205.954	199.125
hsa-miR-374a-3p	172.266	158.925	189.64	222.254	116.717	126.171	117.354	117.2	175.674	121.899	185.489	262.469	155.014	216.728	176.21	163.966	223.668	128.933	183.391	129.923	129.211	211.413	129.926	192.678	135.935	152.095	150.181	127.204	109.401	350.119	228.065	200.102	157.619	176.17	204.707	221.901	181.259	191.573	282.527	167.062
hsa-miR-7-5p	172.266	150.844	118.246	267.205	145.896	155.859	139.826	140.395	115.551	100.83	125.993	108.608	90.9218	130.91	204.18	84.0852	153.115	163.525	156.308	148.936	210.257	188.738	121.264	168.806	161.857	230.162	152.305	165.585	203.831	321.048	140.864	177.139	160.538	109.058	144.742	132.478	111.45	83.8133	100.337	114.75
hsa-miR-222-3p	163.103	127.948	162.867	37.4586	251.306	184.309	340.409	196.553	175.674	171.562	143.492	135.76	278.728	197.819	99.293	168.17	136.603	108.493	206.605	145.767	94.4766	165.396	190.558	160.28	183.986	114.408	302.183	156.812	79.4595	489.156	178.875	268.989	176.592	208.049	126.133	149.038	181.259	258.624	200.673	172.125
hsa-miR-181b-5p	155.772	88.8901	107.091	102.387	117.446	152.148	133.167	123.304	158.765	108.355	87.495	117.659	119.987	106.182	92.3006	105.106	152.365	128.933	82.7966	113.023	99.1078	108.041	137.505	119.926	135.935	103.64	112.56	132.687	101.34	204.763	125.212	68.8874	96.3227	107.38	132.336	132.478	102.877	119.733	68.6513	123.187
hsa-miR-4454	152.107	197.982	37.928	252.221	54.7111	114.42	60.7576	144.058	138.097	155.008	52.497	36.2027	69.3092	87.2731	334.24	67.2682	122.342	139.94	59.5826	204.919	821.576	67.3588	47.6394	167.101	209.277	582.135	96.4802	127.204	96.7333	53.0867	26.8312	49.2053	48.1613	31.8785	41.3549	29.8077	23.2697	26.3413	13.2022	45.5624
hsa-miR-1260a	150.275	83.5028	42.3901	134.851	65.2886	110.709	74.0743	107.433	111.793	200.156	64.7463	63.3547	106.572	65.4548	274.105	37.8383	56.2923	119.499	58.8088	67.6023	139.862	66.6919	63.8801	80.7086	91.0448	199.205	92.8395	148.04	99.0364	70.7823	46.9546	82.0088	65.6745	70.4682	76.5066	49.6794	45.3147	26.3413	26.4044	72.5624
hsa-miR-425-3p	150.275	122.561	84.7803	89.9007	149.908	105.761	165.627	145.279	143.734	141.463	110.244	45.2533	123.713	82.9095	111.879	109.311	130.598	113.21	105.237	127.811	181.543	119.378	126.678	158.007	183.986	134.598	156.856	153.523	123.22	170.636	102.853	127.934	102.16	110.736	105.455	79.4871	84.5058	100.576	66.0109	102.937
hsa-miR-769-5p	150.275	131.988	127.17	124.862	141.519	160.807	153.142	122.083	108.975	111.365	104.994	90.5067	115.515	81.4549	153.834	92.4937	135.852	161.953	124.582	120.417	201.458	152.724	122.347	189.836	134.038	189.783	145.327	119.528	119.765	64.4624	93.9091	111.532	107.998	134.225	124.065	97.7029	116.349	153.259	108.258	86.0624
hsa-miR-590-3p	148.442	129.295	122.708	147.337	105.41	111.328	88.2233	108.654	105.217	103.84	129.493	81.456	87.1955	114.91	124.466	147.149	141.106	103.776	128.451	106.685	161.629	136.718	85.5344	146.64	129.612	155.46	116.504	111.852	123.22	327.368	116.268	141.055	110.917	114.091	107.523	105.983	97.9778	134.101	161.067	109.687
hsa-miR-362-5p	146.609	172.393	149.481	72.42	299.087	262.239	173.95	200.216	186.948	168.552	110.244	126.709	279.473	133.819	139.849	75.6767	207.906	130.506	178.748	149.993	172.281	219.416	210.047	221.096	145.419	206.608	299.149	172.165	122.068	85.9499	138.628	137.775	137.187	196.304	184.029	205.342	198.405	76.6293	116.179	189
hsa-miR-197-3p	139.279	88.8901	111.553	132.354	74.7718	107.617	104.869	120.862	112.732	164.037	160.991	126.709	111.789	122.182	159.428	201.804	122.342	127.361	122.26	121.473	68.0788	101.372	110.437	117.084	139.729	132.579	104.975	132.687	124.371	93.5337	147.571	137.775	113.836	117.447	109.591	92.7349	142.068	129.312	139.943	143.437
hsa-miR-941	126.451	177.78	78.0871	102.387	133.495	134.212	114.857	68.3664	107.096	123.404	117.243	81.456	143.09	129.455	81.1126	126.128	77.3081	89.6244	159.403	156.33	144.957	138.719	121.264	123.905	216.864	166.901	50.0605	95.4033	86.369	174.428	127.448	167.298	102.16	58.7235	111.658	84.455	134.719	119.733	142.584	153.562
hsa-miR-338-3p	120.953	114.48	133.864	192.288	216.656	105.143	38.2856	85.458	78.9126	76.7514	64.7463	63.3547	119.242	113.455	83.9096	84.0852	174.882	216.986	105.237	98.2345	100.96	61.3565	113.685	127.883	115.071	92.1994	90.1089	64.6988	140.494	107.437	73.7857	59.0464	242.266	159.392	167.487	130.822	61.2361	57.4719	129.381	119.812
hsa-miR-4286	109.957	45.7919	42.3901	139.845	25.1671	75.4555	22.472	29.2999	65.7605	90.2958	41.9976	18.1013	46.9514	24.7274	219.563	25.2256	62.2968	53.4602	16.2498	43.3077	132.916	22.0083	21.6543	48.8799	47.4192	185.072	50.3639	82.2442	39.1539	82.158	8.94373	26.2428	14.5943	30.2007	18.6097	6.62392	13.4719	14.368	10.5617	13.5
hsa-miR-30d-3p	109.957	125.254	122.708	44.9503	130.942	124.934	104.869	142.837	104.277	126.414	110.244	45.2533	116.261	126.546	83.9096	75.6767	127.596	77.0456	102.142	82.3903	92.6242	126.048	137.505	115.379	87.2513	102.967	129.247	81.1476	84.0658	102.381	127.448	101.691	109.458	119.125	126.133	119.231	109	124.523	150.505	113.062
hsa-miR-888-5p	109.957	24.2427	69.1629	14.9834	271.732	53.8084	25.8012	18.3124	21.607	118.889	97.9944	108.608	86.4502	106.182	44.7518	63.0639	105.83	1.57236	83.5704	3.16886	316.311	134.051	28.1506	49.4482	7.58707	87.4885	698.723	44.9602	6.90952	27.8073	33.539	65.6071	166.376	38.5897	35.1517	147.382	188.607	186.784	638.985	72.5624
hsa-miR-339-3p	109.957	84.8496	60.2386	89.9007	92.6441	81.6403	107.366	108.654	116.49	109.86	80.4954	81.456	101.355	93.0913	103.489	75.6767	132.099	97.4862	85.8918	105.629	108.833	136.718	82.2863	125.61	122.658	131.233	125.606	74.5681	70.2468	68.2543	46.9546	124.653	84.6472	120.803	86.8453	91.0789	90.6294	83.8133	73.9322	80.9999
hsa-miR-99a-3p	106.292	110.439	82.5492	172.31	87.9025	93.3916	104.869	124.525	126.824	127.919	85.7451	9.05067	112.534	93.0913	89.5036	50.4511	140.356	88.0521	74.2848	99.2908	183.396	123.38	64.9628	161.986	103.058	172.958	210.254	76.7613	135.887	49.2948	76.0217	108.252	83.1878	129.192	68.2356	79.4871	85.7305	100.576	118.82	53.9999
hsa-miR-92b-3p	106.292	68.6878	87.0114	42.4531	57.2643	92.1546	125.677	91.5622	87.3675	102.335	94.4946	135.76	105.827	88.7277	65.7292	71.4724	87.816	70.7561	89.7608	97.1783	27.7872	79.3633	164.573	98.3281	84.09	35.6684	98.9074	80.051	52.973	97.3256	111.797	157.457	61.2962	137.581	93.0486	82.799	110.225	119.733	102.977	114.75
hsa-miR-574-5p	106.292	95.6242	58.0076	192.288	91.9146	59.9933	114.857	91.5622	98.6407	64.712	73.4958	27.152	117.006	65.4548	85.3081	63.0639	86.3149	117.927	67.3206	68.6585	189.88	126.715	61.7147	148.345	149.212	176.323	121.055	64.6988	186.557	264.169	73.7857	49.2053	144.484	68.7904	41.3549	82.799	113.899	71.8399	76.5726	77.6249
hsa-miR-193a-5p	106.292	92.9305	73.625	92.3979	25.1671	65.5597	74.9066	86.6788	76.0943	66.2169	68.2461	45.2533	58.8756	48.0002	65.7292	84.0852	79.5598	141.512	95.9512	70.7711	85.2142	58.0219	85.5344	108.559	116.335	113.735	60.6794	71.2783	145.1	22.7514	91.6732	137.775	116.755	85.5685	82.7099	51.3354	77.1575	88.6026	36.9661	55.6874
hsa-miR-708-5p	104.459	71.3814	40.1591	64.9282	102.492	114.42	83.2296	67.1456	101.459	70.7317	148.741	99.5574	100.61	72.7276	128.661	113.515	93.07	133.65	64.9992	30.6323	75.9518	66.0249	59.5493	38.0808	70.1804	55.8581	82.524	70.1817	96.7333	145.356	44.7186	108.252	68.5934	82.2129	121.997	114.263	62.4608	50.288	44.8874	162
hsa-miR-3615	102.627	47.1387	29.0038	37.4586	52.8874	35.2538	52.4346	42.729	40.3957	33.1085	24.4986	36.2027	47.6967	37.8184	43.3533	42.0426	55.5418	15.7236	39.4638	66.546	37.0497	26.0098	44.3913	56.837	35.4063	37.6874	40.6552	27.4147	55.2761	97.3256	60.3701	59.0464	46.7019	57.0457	59.9646	49.6794	46.5394	71.8399	26.4044	52.3124
hsa-miR-421	100.794	96.971	113.784	87.4034	109.422	103.287	99.8755	73.2497	101.459	103.84	90.9948	81.456	102.846	58.1821	103.489	42.0426	100.576	135.223	119.939	108.797	134.768	104.039	114.768	98.3281	105.587	104.313	110.74	130.494	105.946	125.133	73.7857	78.7285	116.755	85.5685	119.929	104.327	100.427	76.6293	47.5278	72.5624
hsa-miR-210-3p	100.794	78.1155	35.697	49.9448	104.681	94.6286	141.49	139.174	125.884	103.84	106.744	90.5067	97.6292	56.7275	96.496	54.6554	67.5508	51.8878	71.1896	113.023	87.0667	78.0295	71.4591	91.5076	112.542	140.655	104.065	75.6647	118.613	75.8381	40.2468	65.6071	62.7557	98.991	59.9646	56.3033	63.6855	74.2346	42.247	57.3749
hsa-miR-3065-3p	100.794	84.8496	104.86	172.31	153.921	107.617	297.129	102.55	151.249	130.929	83.9952	117.659	56.6398	146.91	47.5488	100.902	187.641	94.3415	155.534	185.906	160.703	106.04	132.091	246.673	232.67	128.541	67.0507	95.4033	180.799	348.855	114.032	104.971	75.8906	142.614	72.3711	96.0469	106.551	55.0773	47.5278	67.4999
hsa-miR-140-5p	98.9613	67.341	138.326	82.4089	115.987	76.0739	59.9253	80.5747	100.52	82.7711	104.994	108.608	106.572	103.273	81.1126	71.4724	106.58	92.7692	102.142	99.2908	90.7717	90.034	119.099	118.789	94.8384	89.5075	104.975	80.051	54.1246	50.5588	100.617	59.0464	93.4038	114.091	62.0324	104.327	97.9778	81.4186	92.4152	101.25
hsa-miR-615-3p	98.9613	154.884	205.258	67.4255	133.495	170.084	121.515	137.954	170.977	148.988	174.99	144.811	193.023	187.637	125.864	151.353	180.886	116.355	127.677	122.529	121.338	154.058	165.655	77.8668	98.6319	82.1046	130.461	114.045	85.2174	58.1426	116.268	65.6071	110.917	151.003	142.674	185.47	155.54	110.155	108.258	148.5
hsa-miR-7977	98.9613	76.7687	55.7765	219.757	33.1914	95.8655	23.3043	73.2497	70.4577	156.513	27.9984	36.2027	58.8756	52.3639	303.473	21.0213	58.544	103.776	21.6664	76.0525	259.348	52.6866	31.3987	73.3198	95.4706	244.295	62.8032	110.756	57.5793	113.757	11.1797	62.3267	39.4047	30.2007	41.3549	14.9038	25.7192	35.92	18.483	38.8124
hsa-miR-331-3p	97.1287	131.988	118.246	72.42	133.13	119.987	163.13	135.512	166.28	117.385	108.494	90.5067	161.722	103.273	125.864	138.741	117.839	122.644	134.641	146.824	152.83	136.718	128.843	169.943	171.974	127.195	139.259	140.363	114.007	140.301	114.032	95.1302	94.8632	115.769	101.32	145.726	95.5283	126.917	113.539	116.437
hsa-miR-450b-5p	97.1287	71.3814	80.3182	74.9172	59.8175	90.9176	28.298	65.9248	47.9112	63.207	48.9972	90.5067	76.0166	107.637	151.037	88.2895	67.5508	72.3285	92.856	79.2214	29.6397	46.0174	50.8876	36.9441	25.2902	45.0902	61.5896	71.2783	46.0635	87.2139	58.1342	78.7285	87.5661	95.6354	78.5744	97.7029	68.5844	110.155	113.539	101.25
hsa-miR-204-3p	95.2961	175.087	122.708	67.4255	121.094	176.269	89.0556	131.85	151.249	170.057	132.992	126.709	119.242	77.0913	93.6991	63.0639	161.371	149.374	187.26	130.979	107.907	144.054	231.701	230.19	161.857	94.2184	100.121	118.432	64.4888	65.7264	187.818	49.2053	86.1066	157.715	119.929	107.639	111.45	81.4186	44.8874	96.1873
hsa-miR-1180-3p	95.2961	91.5837	131.633	39.9558	69.6654	129.882	107.366	107.433	110.853	108.355	97.9944	126.709	152.033	72.7276	149.639	67.2682	114.836	132.078	133.094	159.499	57.8901	143.388	161.324	135.841	99.8964	63.2609	90.4123	93.2101	78.3079	69.5183	147.571	82.0088	97.7821	122.48	103.387	76.1751	107.776	105.365	87.1344	136.687
hsa-miR-106b-3p	93.4635	65.9941	53.5454	62.431	94.1031	87.8252	118.186	95.2246	80.7915	82.7711	69.996	27.152	76.7619	65.4548	72.7217	67.2682	102.077	100.631	82.7966	114.079	131.989	89.3671	88.7826	114.242	131.509	133.252	106.492	91.0169	103.643	111.229	55.8983	65.6071	83.1878	68.7904	70.3034	59.6153	47.7642	40.7093	76.5726	82.6874
hsa-miR-125b-2-3p	93.4635	67.341	73.625	32.4641	78.0545	59.3748	76.5712	56.1581	79.852	63.207	34.998	54.304	63.3472	61.0912	76.9171	46.2469	88.5666	89.6244	65.773	73.94	77.3412	87.3663	73.6246	86.3923	66.3868	98.2563	79.7934	60.3124	76.0047	37.9191	93.9091	68.8874	65.6745	98.991	51.6937	77.8311	72.2586	52.6826	105.617	82.6874
hsa-miR-34c-5p	89.7982	6.7341	0	2.49724	1.09422	5.56639	6.65836	6.10414	2.81831	3.00986	3.4998	0	0.745261	5.81821	8.39096	4.20426	0	7.86179	10.8332	3.16886	8.79929	10.0038	2.16543	0	2.52902	18.8437	66.7473	4.38636	8.0611	36.6551	33.539	16.4018	17.5132	6.71126	20.6775	3.31196	13.4719	2.39466	0	0
hsa-miR-374b-5p	89.7982	107.746	107.091	109.879	117.082	109.472	98.2109	104.991	95.8224	90.2958	85.7451	108.608	86.4502	100.364	96.496	100.902	119.34	154.091	116.07	118.304	153.293	131.383	96.3616	114.811	121.393	164.882	161.407	123.915	120.917	107.437	114.032	108.252	106.539	109.058	86.8453	124.199	115.124	83.8133	171.628	108
hsa-miR-215-5p	89.7982	118.52	82.5492	59.9338	166.322	122.461	36.621	62.2623	111.793	31.6035	87.495	54.304	78.2524	114.91	41.9548	75.6767	139.605	91.1968	86.6656	41.1951	105.128	94.7024	98.527	53.4268	48.6837	65.2799	75.5458	50.4431	64.4888	93.5337	49.1905	45.9249	90.4849	83.8907	82.7099	92.7349	86.9553	31.1306	39.6065	65.8124
hsa-miR-17-5p	89.7982	90.2369	129.401	89.9007	99.9389	87.8252	89.8879	95.2246	100.52	93.3056	110.244	135.76	89.4313	107.637	85.3081	88.2895	88.5666	84.9074	123.034	52.8143	119.948	96.7032	108.271	114.811	85.3545	84.7966	96.7836	92.1135	84.0658	69.5183	125.212	114.812	105.079	114.091	115.794	142.414	109	69.4453	97.6961	101.25
hsa-miR-324-5p	87.9656	84.8496	80.3182	117.37	86.4435	66.1781	79.0681	74.4706	109.914	49.6627	57.7467	18.1013	68.564	37.8184	79.7141	63.0639	71.3036	69.1838	74.2848	78.1651	154.219	73.361	60.632	96.0546	91.0448	167.574	76.456	54.8295	119.765	73.3102	80.4935	62.3267	93.4038	46.9788	70.3034	66.2392	53.8878	45.4986	52.8087	64.1249
hsa-miR-155-5p	87.9656	129.295	75.856	122.365	200.972	95.2471	64.0868	170.916	98.6407	27.0887	57.7467	72.4054	114.77	61.0912	95.0976	96.698	118.589	477.997	125.356	123.585	490.908	132.05	68.211	126.178	198.528	1432.79	91.6259	53.7329	252.197	60.6705	181.11	62.3267	175.132	80.5351	117.862	122.543	115.124	64.6559	39.6065	57.3749
hsa-miR-1260b	84.3004	40.4046	17.8485	92.3979	33.9209	74.837	40.7825	52.4956	66.6999	147.483	45.4974	18.1013	64.0924	32.0001	176.21	33.6341	41.281	53.4602	24.7616	45.4203	96.7922	34.6798	33.5641	51.7217	46.1547	139.982	44.5994	108.562	50.6698	37.9191	17.8875	45.9249	29.1887	21.8116	41.3549	26.4957	25.7192	16.7627	13.2022	35.4374
hsa-miR-514a-3p	84.3004	105.052	44.6212	132.354	220.668	126.79	20.8074	18.3124	154.067	54.1775	54.2469	108.608	127.44	84.364	55.9397	130.332	61.5463	127.361	225.176	51.758	175.06	72.6941	87.6998	42.0594	36.0386	37.6874	53.3979	51.5397	40.3055	128.925	62.6061	19.6821	53.9991	45.301	33.0839	38.0876	102.877	16.7627	44.8874	45.5624
hsa-miR-503-5p	78.8025	43.0982	80.3182	67.4255	74.4071	90.9176	32.4595	59.8206	94.883	94.8106	50.7471	81.456	89.4313	84.364	172.015	71.4724	66.0497	48.7431	85.8918	135.205	30.566	50.0189	68.211	57.9738	31.6128	49.1282	62.1964	64.6988	73.7015	46.7668	46.9546	55.766	75.8906	53.69	64.1001	59.6153	78.3822	33.5253	42.247	97.8748
hsa-miR-195-5p	76.9699	162.965	100.398	229.746	199.513	78.5479	51.6023	111.095	78.9126	73.7416	55.9968	45.2533	56.6398	72.7276	148.24	50.4511	168.877	433.971	165.593	133.092	514.064	116.711	100.692	140.956	297.792	843.255	104.975	92.1135	185.405	72.0462	49.1905	72.1678	61.2962	68.7904	76.5066	101.015	80.8317	55.0773	47.5278	33.7499
hsa-miR-4662a-5p	76.9699	64.6473	93.7045	22.4752	26.6261	37.1092	23.3043	41.5082	42.2746	60.1972	52.497	63.3547	60.3661	135.273	125.864	25.2256	96.8228	36.1643	77.38	105.629	41.6809	32.679	42.2259	89.2342	39.8321	47.1092	50.0605	53.7329	34.5476	34.1272	42.4827	52.4856	74.4311	75.5016	47.5582	64.5833	28.1686	76.6293	36.9661	57.3749
hsa-miR-181a-3p	73.3047	21.5491	40.1591	32.4641	54.3463	51.9529	38.2856	59.8206	52.6084	49.6627	52.497	27.152	43.2251	42.182	47.5488	37.8383	58.544	58.1773	30.952	34.8574	41.6809	45.3505	51.9703	28.4185	41.7289	36.3414	43.6892	49.3465	43.7603	45.5029	31.303	22.9625	33.567	55.3679	74.4389	46.3675	22.045	28.736	0	52.3124
hsa-miR-19a-3p	71.4721	86.1964	89.2424	99.8896	77.6897	82.2588	46.6085	54.9373	78.9126	66.2169	82.2453	45.2533	59.6209	56.7275	83.9096	71.4724	87.0655	67.6114	95.9512	64.4334	77.3412	116.711	75.79	76.1616	67.0191	73.3558	73.7255	70.1817	65.6404	113.757	82.7295	49.2053	74.4311	82.2129	101.32	77.8311	64.9103	88.6026	124.1	74.2499
hsa-miR-93-3p	69.6395	56.5664	46.8523	42.4531	47.781	45.1496	80.7327	58.5998	64.8211	57.1873	48.9972	45.2533	58.8756	39.2729	61.5337	21.0213	69.0519	77.0456	47.9756	44.364	60.2057	56.0212	45.474	65.3626	82.1932	69.9908	58.5556	63.6022	51.8214	50.5588	35.7749	45.9249	35.0264	62.0791	43.4227	57.9593	36.7417	45.4986	15.8426	57.3749
hsa-miR-629-5p	69.6395	72.7282	78.0871	82.4089	58.7232	66.1781	77.4035	90.3413	79.852	76.7514	69.996	108.608	51.423	62.5457	46.1503	54.6554	69.8025	81.7627	75.8324	77.1088	122.264	56.0212	74.7073	71.6147	110.012	131.233	72.5119	50.4431	119.765	59.4065	84.9654	68.8874	77.35	75.5016	72.3711	33.1196	83.2811	110.155	47.5278	45.5624
hsa-miR-489-3p	67.8068	72.7282	75.856	12.4862	377.142	271.516	120.683	153.824	77.9732	102.335	64.7463	27.152	190.041	81.4549	90.9021	75.6767	203.403	117.927	99.8202	62.3208	91.6979	96.0363	109.354	214.276	36.6708	116.427	135.922	122.818	74.8531	40.447	78.2576	49.2053	67.134	57.0457	70.3034	71.2072	122.472	112.549	55.4491	77.6249
hsa-miR-15a-5p	65.9742	114.48	75.856	124.862	100.304	103.287	91.5525	112.316	96.7619	64.712	89.2449	153.861	84.9597	72.7276	92.3006	84.0852	110.333	130.506	113.749	119.36	153.293	122.713	87.6998	99.4648	151.109	191.129	113.774	92.1135	102.491	235.098	64.842	88.5695	72.9717	72.146	64.1001	44.7115	56.3372	67.0506	68.6513	64.1249
hsa-miR-320c	64.1416	51.1791	62.4697	29.9669	47.781	34.6353	70.7451	47.6123	62.9422	60.1972	59.4966	9.05067	58.8756	56.7275	27.9699	54.6554	52.5395	44.026	43.3328	44.364	38.9021	46.0174	77.9554	68.2045	71.4449	51.1471	40.0484	32.8977	39.1539	44.2389	60.3701	88.5695	45.2425	75.5016	43.4227	54.6474	58.7867	88.6026	21.1235	65.8124
hsa-miR-1296-5p	64.1416	82.156	71.3939	67.4255	33.1914	39.5832	55.7638	56.1581	36.638	55.6824	68.2461	72.4054	56.6398	61.0912	48.9473	33.6341	56.2923	66.0391	64.2254	55.9831	52.3326	58.6888	44.3913	56.2687	50.5805	63.2609	57.6454	36.1875	65.6404	24.0154	53.6624	85.2892	43.783	65.4347	62.0324	57.9593	51.4383	55.0773	68.6513	74.2499
hsa-let-7a-3p	62.309	90.2369	53.5454	77.4145	80.9724	85.3513	50.77	53.7165	69.5182	70.7317	69.996	99.5574	66.3282	81.4549	58.7367	25.2256	89.3172	61.322	74.2848	83.4465	89.8454	62.0234	60.632	82.4137	53.7417	107.678	93.7497	59.2158	69.0952	75.8381	84.9654	62.3267	78.8094	63.7569	59.9646	72.8632	51.4383	76.6293	92.4152	53.9999
hsa-miR-206	60.4764	230.306	113.784	149.834	190.395	109.472	58.2607	106.212	68.5788	124.909	118.993	796.459	146.071	68.3639	48.9473	180.783	74.3059	161.953	103.689	87.6717	44.4596	50.0189	111.52	28.4185	27.8193	74.0288	45.2061	76.7613	100.188	53.0867	677.487	85.2892	197.024	73.8238	165.42	129.167	86.9553	88.6026	1436.4	430.312
hsa-miR-199a-3p	58.6438	52.526	82.5492	47.4476	59.088	50.0975	69.0805	47.6123	44.1535	85.781	57.7467	45.2533	80.4882	56.7275	75.5186	50.4511	78.8093	50.3155	85.8918	88.728	44.9227	54.6873	88.7826	47.7431	37.9353	51.1471	50.0605	43.8636	40.3055	74.5742	82.7295	62.3267	42.3236	50.3344	66.1679	59.6153	139.618	95.7866	102.977	80.9999
hsa-miR-671-5p	58.6438	25.5896	33.4659	39.9558	27.7203	35.8723	37.4533	34.1832	40.3957	33.1085	29.7483	27.152	29.8104	17.4546	43.3533	63.0639	30.7731	47.1708	41.7852	36.97	31.9553	36.6805	22.737	30.1236	42.9934	38.3604	29.7329	26.3181	39.1539	25.2794	29.0671	36.0839	39.4047	33.5563	33.0839	41.3995	18.3708	21.552	15.8426	37.1249
hsa-miR-1306-5p	58.6438	56.5664	51.3144	67.4255	19.3312	41.4387	55.7638	58.5998	43.214	96.3155	78.7455	153.861	54.404	104.728	82.5111	121.924	51.0384	48.7431	64.2254	36.97	12.0411	54.0204	58.4666	46.6064	32.8773	17.4977	40.9586	49.3465	28.7897	66.9903	111.797	91.8499	93.4038	70.4682	59.9646	89.423	79.6069	79.0239	105.617	101.25
hsa-miR-3135b	58.6438	80.8092	49.0833	137.348	17.1428	39.5832	26.6335	54.9373	29.1225	51.1676	26.2485	45.2533	43.9704	21.8183	58.7367	42.0426	57.0429	81.7627	67.3206	48.5891	79.1937	26.6767	40.0604	48.3115	74.6062	199.205	27.9125	25.2216	95.5817	13.9037	60.3701	65.6071	51.0802	48.6566	86.8453	43.0555	60.0114	43.104	23.7639	60.7499
hsa-miR-320b	56.8111	25.5896	33.4659	17.4807	23.7081	30.9244	45.7763	35.404	32.8802	42.138	31.4982	54.304	27.5746	33.4547	20.9774	25.2256	32.2743	23.5854	27.8568	34.8574	19.4511	18.6737	43.3086	43.1962	34.1418	21.5356	22.7548	25.2216	18.4254	41.711	58.1342	45.9249	20.4321	46.9788	35.1517	26.4957	46.5394	57.4719	13.2022	16.875
hsa-miR-625-3p	54.9785	74.0751	104.86	29.9669	70.0302	63.7042	129.006	95.2246	83.6098	133.939	106.744	81.456	106.572	52.3639	48.9473	75.6767	76.5576	80.1903	110.653	121.473	38.9021	42.6828	115.85	48.8799	109.38	68.6448	76.1526	70.1817	77.1563	216.139	80.4935	137.775	62.7557	147.648	35.1517	57.9593	75.9328	110.155	29.0448	43.8749
hsa-miR-542-5p	53.1459	40.4046	62.4697	29.9669	59.8175	58.1378	31.6272	57.379	49.7901	55.6824	40.2477	45.2533	74.5261	50.9093	111.879	58.8596	39.7799	34.5919	68.0944	47.5328	31.9553	29.3444	43.3086	21.5981	22.7612	22.2086	56.1284	35.0909	33.396	25.2794	24.5952	72.1678	48.1613	70.4682	41.3549	41.3995	40.4158	64.6559	52.8087	87.7498
hsa-miR-500a-5p	51.3133	48.4855	40.1591	24.9724	86.8083	89.0622	67.4159	61.0414	52.6084	73.7416	15.7491	54.304	64.0924	40.7275	46.1503	42.0426	70.5531	45.5984	61.1302	64.4334	21.3036	78.6964	53.053	54.5636	48.0514	63.2609	87.6817	57.0227	44.9119	25.2794	42.4827	65.6071	51.0802	83.8907	39.2872	62.9273	45.3147	45.4986	23.7639	57.3749
hsa-miR-324-3p	49.4807	48.4855	71.3939	59.9338	54.3463	66.1781	86.5587	58.5998	58.245	67.7218	61.2465	27.152	67.0735	91.6368	60.1352	50.4511	76.5576	58.1773	60.3564	79.2214	68.0788	66.0249	55.2184	61.384	77.1352	82.7776	64.0168	58.1192	65.6404	42.9749	69.3139	45.9249	64.2151	45.301	74.4389	62.9273	61.2361	26.3413	44.8874	69.1874
hsa-miR-326	49.4807	12.1214	24.5417	22.4752	7.65955	12.9882	21.6397	25.6374	16.9098	22.5739	17.499	18.1013	26.0841	10.1819	19.5789	16.817	8.25621	12.5789	10.0594	22.182	18.988	8.66994	6.49628	19.3246	25.2902	14.1328	15.4732	36.1875	36.8508	15.1676	8.94373	13.1214	20.4321	20.1338	18.6097	8.2799	12.2472	11.9733	7.92131	15.1875
hsa-miR-29b-2-5p	49.4807	44.445	51.3144	62.431	59.4527	63.7042	60.7576	51.2748	71.3971	63.207	47.2473	45.2533	65.5829	59.6366	57.3382	33.6341	46.535	37.7366	50.297	61.2646	52.3326	50.0189	42.2259	56.837	62.5933	59.896	63.41	70.1817	77.1563	31.5992	44.7186	45.9249	58.3774	48.6566	45.4904	41.3995	33.0675	38.3146	23.7639	65.8124
hsa-miR-671-3p	49.4807	41.7514	22.3106	32.4641	16.0486	19.7916	34.1241	28.0791	23.4859	25.5838	29.7483	9.05067	26.0841	29.091	23.7744	37.8383	24.0181	55.0326	24.7616	20.0694	26.3979	31.3452	29.2333	21.5981	41.0966	32.3035	29.1261	24.125	31.0928	24.0154	24.5952	26.2428	29.1887	31.8785	33.0839	14.9038	24.4944	19.1573	18.483	20.25
hsa-miR-184	49.4807	171.046	55.7765	164.818	51.0637	64.3227	45.7763	46.3915	49.7901	120.394	220.487	1737.73	35.0273	48.0002	40.5563	113.515	51.0384	210.696	124.582	97.1783	19.4511	30.6783	54.1357	17.0511	35.4063	18.8437	30.9465	57.0227	33.396	80.894	1073.25	150.896	271.455	31.8785	33.0839	109.295	41.6406	203.546	1666.11	298.687
hsa-miR-9-3p	47.648	126.601	98.1667	57.4365	94.8325	141.015	131.503	95.2246	69.5182	82.7711	75.2457	90.5067	52.9135	53.8184	82.5111	96.698	105.83	102.203	183.391	108.797	106.981	93.3686	165.655	172.216	103.058	109.697	94.9632	142.557	40.3055	68.2543	120.74	85.2892	48.1613	82.2129	72.3711	39.7435	84.5058	100.576	36.9661	60.7499
hsa-miR-21-3p	47.648	14.815	20.0795	29.9669	33.9209	22.2655	22.472	26.8582	33.8197	16.5542	10.4994	36.2027	17.8863	4.36366	22.3759	21.0213	21.7664	29.8748	16.2498	21.1257	32.8816	41.349	15.158	35.239	53.7417	31.6305	26.6989	25.2216	26.4865	202.235	4.47186	29.5232	14.5943	8.38907	20.6775	8.2799	11.0225	16.7627	5.28087	15.1875
hsa-miR-1275	45.8154	28.2832	11.1553	44.9503	9.11851	24.121	21.6397	32.9624	15.031	27.0887	20.9988	0	20.8673	39.2729	29.3684	8.40852	25.5192	40.8813	17.7974	14.788	37.0497	25.3429	33.5641	34.1022	15.8064	51.8201	15.1698	17.5454	50.6698	5.05588	53.6624	49.2053	26.2698	36.9119	31.0162	24.8397	25.7192	16.7627	23.7639	16.875
hsa-miR-3613-5p	45.8154	51.1791	22.3106	82.4089	20.4255	21.0286	23.3043	31.7415	31.0014	57.1873	41.9976	54.304	23.8483	36.3638	34.9623	29.4298	30.7731	36.1643	43.3328	33.8011	36.1234	30.6783	27.0679	35.8073	30.9805	33.6494	26.0921	19.7386	34.5476	217.403	40.2468	59.0464	46.7019	48.6566	35.1517	24.8397	20.8203	64.6559	47.5278	37.1249
hsa-miR-320d	43.9828	36.3641	31.2348	27.4696	30.6382	24.121	43.2794	42.729	37.5774	36.1183	31.4982	18.1013	39.4988	21.8183	16.7819	25.2256	35.2765	26.7301	29.4044	30.6323	22.2298	28.0106	51.9703	50.0166	57.5353	34.9954	22.7548	19.7386	27.6381	42.9749	44.7186	42.6446	40.8642	41.9453	26.8807	52.9914	31.8428	52.6826	10.5617	35.4374
hsa-miR-874-5p	43.9828	30.9768	49.0833	9.98896	64.1943	29.0689	48.2731	56.1581	33.8197	52.6725	26.2485	9.05067	52.1683	52.3639	36.3608	33.6341	46.535	25.1577	18.5712	32.7448	25.9348	58.6888	21.6543	43.7645	39.8321	39.7063	68.5677	32.8977	21.8801	8.84778	20.1234	16.4018	36.4859	57.0457	31.0162	44.7115	42.8653	43.104	50.1683	37.1249
hsa-miR-505-3p	43.9828	40.4046	24.5417	17.4807	29.1792	35.8723	36.621	21.9749	32.8802	33.1085	47.2473	45.2533	21.6126	24.7274	29.3684	33.6341	39.0293	20.4407	23.214	36.97	41.6809	21.3414	23.8197	25.5767	34.7741	23.5546	25.7887	35.0909	24.1833	20.2235	29.0671	26.2428	35.0264	23.4894	24.813	18.2158	33.0675	14.368	7.92131	15.1875
hsa-miR-200c-5p	43.9828	33.6705	37.928	47.4476	25.5318	27.2134	40.7825	37.8457	28.1831	40.6331	31.4982	27.152	26.8294	24.7274	36.3608	25.2256	22.5169	55.0326	27.8568	42.2514	58.8163	36.6805	17.3234	36.3757	39.8321	45.7632	37.6212	47.1533	48.3666	80.894	26.8312	49.2053	45.2425	18.456	43.4227	28.1517	17.1461	16.7627	26.4044	15.1875
hsa-miR-504-5p	42.1502	28.2832	17.8485	72.42	47.0515	21.6471	9.15525	23.1957	16.9098	13.5444	12.2493	9.05067	16.3957	14.5455	9.78945	12.6128	21.7664	28.3025	20.1188	9.50657	46.7752	34.0129	15.158	21.0297	19.5999	41.0523	20.631	8.77272	61.0341	5.05588	44.7186	29.5232	45.2425	26.845	28.9484	24.8397	34.2922	21.552	34.3257	15.1875
hsa-miR-664a-3p	42.1502	22.8959	31.2348	22.4752	40.1215	22.2655	29.1303	35.404	30.0619	18.0592	19.2489	27.152	23.8483	10.1819	26.5714	42.0426	24.0181	20.4407	28.6306	34.8574	29.1766	27.3437	33.5641	31.2604	22.1289	28.9385	32.1601	36.1875	24.1833	10.1118	22.3593	6.56071	20.4321	16.7781	43.4227	33.1196	19.5956	26.3413	21.1235	25.3125
hsa-let-7b-3p	40.3176	55.2196	60.2386	17.4807	39.7567	41.4387	36.621	40.2873	38.5169	48.1577	41.9976	18.1013	32.0462	39.2729	23.7744	58.8596	30.7731	42.4537	59.5826	31.6886	43.0702	32.0121	40.0604	37.5125	37.9353	43.0713	43.0824	43.8636	28.7897	20.2235	53.6624	16.4018	35.0264	45.301	35.1517	24.8397	31.8428	23.9466	23.7639	40.4999
hsa-miR-628-3p	40.3176	49.8323	80.3182	27.4696	49.6047	39.5832	48.2731	51.2748	51.669	48.1577	47.2473	81.456	52.1683	68.3639	29.3684	33.6341	42.0316	45.5984	55.7136	41.1951	26.3979	38.6813	72.5418	55.1319	38.5676	25.5736	53.7013	66.892	27.6381	27.8073	98.381	22.9625	37.9453	38.5897	37.2194	57.9593	78.3822	50.288	63.3704	47.2499
hsa-miR-589-5p	40.3176	21.5491	24.5417	37.4586	25.5318	27.2134	32.4595	21.9749	30.0619	31.6035	19.2489	18.1013	29.8104	14.5455	25.1729	8.40852	36.7777	26.7301	26.3092	35.9137	25.9348	28.6775	28.1506	32.9655	46.1547	37.6874	23.0582	24.125	29.9412	30.3353	22.3593	39.3642	11.6755	25.1672	14.4742	18.2158	26.9439	23.9466	23.7639	28.6875
hsa-miR-1246	38.485	379.803	272.189	172.31	161.945	78.5479	246.359	19.5333	69.5182	4.51479	40.2477	108.608	374.121	32.0001	6.99247	29.4298	12.7596	83.335	44.1066	79.2214	57.8901	9.33686	64.9628	22.7348	24.658	200.551	29.1261	30.7045	85.2174	815.26	49.1905	19.6821	119.674	72.146	177.826	798.183	89.4047	14.368	15.8426	96.1873
hsa-miR-6724-5p	38.485	14.815	26.7727	12.4862	8.38903	12.3697	15.8136	15.8708	29.1225	30.0986	10.4994	27.152	23.1031	30.5456	33.5638	33.6341	16.5124	15.7236	13.9284	15.8443	11.1149	24.676	12.9926	14.7776	10.1161	8.07586	16.08	15.3523	9.21269	12.6397	20.1234	9.84106	18.9726	40.2675	22.7452	21.5278	46.5394	11.9733	29.0448	37.1249
hsa-miR-484	38.485	25.5896	29.0038	17.4807	20.0607	33.3983	35.7887	43.9498	26.3042	30.0986	20.9988	36.2027	20.8673	30.5456	30.7669	46.2469	40.5305	55.0326	37.9162	25.3508	24.5454	27.3437	17.3234	26.7134	33.5096	54.5121	30.6431	29.6079	20.7286	25.2794	17.8875	32.8035	21.8915	33.5563	28.9484	19.8718	39.1911	19.1573	21.1235	23.625
hsa-miR-449a	38.485	12.1214	6.69318	49.9448	16.4133	14.2252	37.4533	29.2999	27.2436	31.6035	17.499	9.05067	18.6315	30.5456	22.3759	29.4298	10.5079	23.5854	13.9284	40.1388	23.6192	8.66994	27.0679	23.8716	47.4192	35.6684	20.631	30.7045	21.8801	7.58381	13.4156	55.766	21.8915	77.1794	18.6097	23.1837	12.2472	31.1306	5.28087	13.5
hsa-miR-497-5p	36.6523	84.8496	33.4659	77.4145	59.4527	34.0168	25.8012	57.379	30.0619	30.0986	24.4986	63.3547	20.122	27.6365	34.9623	16.817	84.0632	160.381	48.7494	47.5328	210.257	64.0242	28.1506	64.7942	157.432	291.404	40.3518	20.8352	61.0341	18.9595	15.6515	13.1214	18.9726	25.1672	20.6775	14.9038	31.8428	7.18399	2.64044	30.3749
hsa-miR-132-3p	36.6523	52.526	15.6174	32.4641	30.6382	25.9765	22.472	18.3124	31.0014	34.6134	40.2477	36.2027	37.263	29.091	34.9623	42.0426	33.0248	26.7301	50.297	32.7448	42.144	38.6813	35.7296	50.0166	32.8773	37.6874	34.2839	36.1875	32.2444	65.7264	40.2468	22.9625	33.567	33.5563	28.9484	24.8397	37.9664	16.7627	36.9661	40.4999
hsa-miR-148b-5p	34.8197	20.2023	22.3106	57.4365	31.0029	21.6471	31.6272	21.9749	32.8802	34.6134	29.7483	63.3547	26.8294	27.6365	33.5638	29.4298	28.5214	29.8748	27.083	29.576	31.9553	33.3459	23.8197	36.3757	24.0257	37.6874	24.2718	26.3181	29.9412	46.7668	38.0108	19.6821	35.0264	23.4894	35.1517	36.4316	23.2697	28.736	26.4044	25.3125
hsa-miR-491-5p	32.9871	16.1618	13.3864	24.9724	16.7781	16.0807	18.3105	23.1957	16.9098	10.5345	12.2493	27.152	15.6505	10.1819	16.7819	25.2256	18.7641	50.3155	18.5712	26.4071	34.2709	21.3414	11.9099	17.6195	27.187	52.4931	20.9344	16.4488	49.5182	11.3757	11.1797	16.4018	17.5132	15.1003	24.813	13.2478	18.3708	19.1573	18.483	21.9375
hsa-miR-138-5p	31.1545	24.2427	29.0038	4.99448	40.4862	42.0571	35.7887	34.1832	46.9718	22.5739	17.499	18.1013	34.282	14.5455	27.9699	29.4298	31.5237	40.8813	16.2498	41.1951	42.144	16.673	45.474	26.7134	25.2902	33.6494	33.0703	20.8352	14.9706	13.9037	13.4156	9.84106	14.5943	36.9119	16.542	29.8077	19.5956	21.552	2.64044	13.5
hsa-miR-576-5p	31.1545	22.8959	44.6212	29.9669	25.1671	30.9244	33.2918	36.6249	30.0619	33.1085	17.499	27.152	26.0841	20.3637	46.1503	12.6128	29.272	39.309	36.3686	25.3508	27.7872	28.6775	32.4814	28.4185	33.5096	43.0713	35.194	31.8011	29.9412	40.447	20.1234	49.2053	30.6481	35.2341	37.2194	19.8718	29.3933	40.7093	31.6852	40.4999
hsa-miR-378a-5p	31.1545	35.0173	33.4659	27.4696	49.6047	38.9647	30.7949	31.7415	66.6999	55.6824	43.7475	36.2027	35.0273	30.5456	20.9774	21.0213	45.0339	28.3025	38.69	26.4071	47.7014	36.0136	27.0679	30.1236	46.7869	29.6115	38.5314	27.4147	26.4865	68.2543	24.5952	9.84106	32.1076	25.1672	18.6097	29.8077	17.1461	16.7627	18.483	40.4999
hsa-miR-26a-1-3p	29.3219	20.2023	46.8523	22.4752	30.2735	25.358	22.472	25.6374	21.607	27.0887	40.2477	45.2533	26.0841	40.7275	26.5714	21.0213	28.5214	22.013	32.4996	27.4634	26.861	22.6752	37.895	26.145	20.8644	30.2845	37.9246	35.0909	21.8801	25.2794	31.303	19.6821	42.3236	35.2341	39.2872	28.1517	30.6181	26.3413	23.7639	52.3124
hsa-miR-2110	29.3219	25.5896	24.5417	14.9834	20.4255	18.5546	26.6335	20.7541	31.0014	25.5838	24.4986	18.1013	25.3389	14.5455	20.9774	25.2256	21.7664	26.7301	15.476	21.1257	21.7667	11.3376	18.4061	26.145	22.1289	32.9764	24.2718	16.4488	21.8801	25.2794	33.539	16.4018	20.4321	25.1672	24.813	28.1517	30.6181	28.736	26.4044	21.9375
hsa-miR-125a-3p	27.4893	26.9364	17.8485	22.4752	29.544	24.121	23.3043	20.7541	37.5774	31.6035	52.497	36.2027	28.3199	16.0001	20.9774	37.8383	33.7754	20.4407	38.69	46.4766	28.7135	37.3474	40.0604	35.239	35.4063	24.9006	24.8786	20.8352	23.0317	36.6551	40.2468	39.3642	23.3509	36.9119	28.9484	21.5278	34.2922	33.5253	31.6852	37.1249
hsa-miR-1268a	27.4893	17.5087	13.3864	22.4752	2.91792	10.5143	12.4844	14.6499	9.39436	18.0592	19.2489	45.2533	12.6694	16.0001	20.9774	42.0426	9.00677	9.43415	6.1904	11.6191	1.85248	8.00302	18.4061	8.52556	7.58707	4.71092	3.94416	8.77272	5.75793	79.63	11.1797	65.6071	16.0538	26.845	14.4742	36.4316	15.9214	35.92	39.6065	38.8124
hsa-miR-1468-5p	27.4893	51.1791	37.928	14.9834	42.3099	32.1613	36.621	36.6249	48.8507	40.6331	40.2477	18.1013	48.4419	55.273	20.9774	16.817	39.0293	28.3025	34.821	23.2383	30.566	30.0113	36.8123	38.0808	28.4515	30.9575	48.5435	17.5454	17.2738	10.1118	40.2468	22.9625	39.4047	26.845	43.4227	34.7756	31.8428	45.4986	34.3257	45.5624
hsa-miR-409-3p	27.4893	33.6705	2.23106	29.9669	10.2127	8.65882	14.149	10.9875	38.5169	30.0986	36.7479	27.152	8.19787	49.4548	4.19548	8.40852	36.0271	17.2959	6.9642	44.364	106.518	6.66919	22.737	20.4613	30.9805	4.03793	5.76454	21.9318	29.9412	20.2235	55.8983	22.9625	21.8915	15.1003	20.6775	41.3995	6.12361	2.39466	2.64044	72.5624
hsa-miR-432-5p	27.4893	13.4682	2.23106	79.9117	4.74163	7.42185	7.49066	2.44166	49.7901	37.6232	13.9992	27.152	11.1789	45.0911	4.19548	4.20426	52.5395	9.43415	10.0594	36.97	93.5504	6.66919	16.2407	14.7776	30.3483	0.672989	3.94416	31.8011	13.819	25.2794	35.7749	19.6821	23.3509	11.7447	14.4742	38.0876	1.22472	11.9733	2.64044	53.9999
hsa-miR-25-5p	25.6566	17.5087	8.92424	12.4862	15.3191	17.3176	15.8136	23.1957	19.7281	12.0394	12.2493	18.1013	14.9052	10.1819	15.3834	25.2256	22.5169	22.013	24.7616	17.9569	25.4716	18.0068	21.6543	18.1879	15.8064	30.2845	20.9344	25.2216	28.7897	13.9037	22.3593	22.9625	24.8104	15.1003	10.3387	16.5598	30.6181	14.368	7.92131	8.43749
hsa-miR-34b-3p	25.6566	1.34682	0	0	0.364741	3.09244	1.66459	1.22083	0.939436	0	0	0	0.745261	1.45455	1.39849	0	0	0	3.0952	2.11257	1.38936	3.33459	1.08271	2.84185	1.26451	2.01897	18.8106	2.19318	2.30317	16.4316	31.303	3.28035	5.83774	1.67781	2.06775	1.65598	4.89889	2.39466	0	0
hsa-miR-192-3p	25.6566	45.7919	20.0795	17.4807	60.1822	27.2134	8.32296	25.6374	22.5465	13.5444	31.4982	0	23.8483	36.3638	9.78945	8.40852	56.2923	39.309	18.5712	16.9006	43.0702	28.6775	21.6543	14.7776	17.7032	26.9195	44.5994	13.1591	20.7286	12.6397	6.70779	3.28035	29.1887	33.5563	18.6097	19.8718	20.8203	11.9733	13.2022	16.875
hsa-miR-12136	25.6566	8.08092	13.3864	12.4862	8.38903	9.8958	4.16148	3.66249	44.1535	1.50493	36.7479	0	0.745261	8.72731	4.19548	4.20426	12.009	6.28943	3.869	6.33771	14.8199	4.66843	4.33086	9.6623	15.8064	21.5356	6.97813	1.09659	5.75793	10.1118	8.94373	0	8.75661	8.38907	0	1.65598	4.89889	0	10.5617	3.37499
hsa-miR-582-3p	25.6566	40.4046	20.0795	29.9669	22.6139	25.9765	28.298	18.3124	18.7887	13.5444	15.7491	27.152	26.8294	23.2728	19.5789	21.0213	25.5192	25.1577	24.7616	26.4071	34.7341	49.352	20.5716	21.0297	37.3031	39.0333	36.711	43.8636	20.7286	24.0154	24.5952	22.9625	42.3236	16.7781	26.8807	18.2158	22.045	14.368	39.6065	13.5
hsa-miR-1226-3p	25.6566	20.2023	15.6174	9.98896	10.2127	12.9882	18.3105	12.2083	22.5465	13.5444	26.2485	36.2027	11.9242	16.0001	11.1879	8.40852	15.0113	25.1577	16.2498	14.788	17.5986	14.0053	23.8197	11.9358	12.0129	14.1328	13.6529	8.77272	20.7286	15.1676	13.4156	36.0839	14.5943	10.0669	12.4065	19.8718	18.3708	21.552	7.92131	8.43749
hsa-miR-194-3p	23.824	20.2023	8.92424	7.49172	40.1215	22.884	4.99377	19.5333	42.2746	4.51479	22.7487	9.05067	15.6505	18.9092	8.39096	25.2256	13.5102	20.4407	15.476	7.394	22.2298	20.6745	17.3234	15.9144	12.0129	5.38391	16.3834	3.28977	12.6675	8.84778	8.94373	6.56071	13.1349	15.1003	14.4742	19.8718	14.6967	7.18399	7.92131	20.25
hsa-miR-193b-5p	23.824	16.1618	24.5417	22.4752	19.3312	14.2252	19.1428	25.6374	26.3042	30.0986	24.4986	27.152	38.7536	45.0911	18.1804	16.817	27.0203	28.3025	24.7616	27.4634	19.9142	18.0068	20.5716	19.3246	17.0709	16.8247	33.9805	15.3523	27.6381	10.1118	26.8312	16.4018	32.1076	45.301	26.8807	33.1196	24.4944	28.736	68.6513	35.4374
hsa-miR-381-3p	23.824	12.1214	4.46212	14.9834	4.74163	6.18487	4.99377	7.32497	13.1521	18.0592	20.9988	9.05067	3.7263	18.9092	2.79699	0	30.0226	9.43415	10.8332	13.7317	44.4596	10.0038	11.9099	8.52556	11.3806	3.36494	3.94416	18.642	16.1222	11.3757	17.8875	6.56071	21.8915	8.38907	18.6097	23.1837	2.44944	11.9733	10.5617	20.25
hsa-miR-28-5p	21.9914	13.4682	17.8485	22.4752	20.0607	9.8958	19.9751	13.4291	16.9098	9.02958	19.2489	9.05067	11.9242	16.0001	20.9774	12.6128	17.263	31.4472	23.214	12.6754	20.3773	19.3406	14.0753	18.7562	20.2322	30.2845	25.4853	13.1591	12.6675	12.6397	15.6515	13.1214	33.567	15.1003	24.813	21.5278	17.1461	7.18399	18.483	16.875
hsa-miR-126-5p	21.9914	47.1387	71.3939	34.9614	40.1215	55.0454	66.5836	19.5333	40.3957	22.5739	40.2477	27.152	40.2441	64.0003	53.1427	71.4724	47.2856	50.3155	54.166	50.7017	39.3653	60.0227	53.053	79.0035	61.9611	63.9339	57.342	13.1591	33.396	39.183	26.8312	29.5232	90.4849	33.5563	45.4904	97.7029	71.0339	71.8399	200.673	62.4374
hsa-miR-3605-3p	21.9914	28.2832	22.3106	12.4862	26.2613	20.4101	38.2856	25.6374	26.3042	39.1282	26.2485	0	22.3578	30.5456	19.5789	25.2256	22.5169	23.5854	25.5354	30.6323	27.3241	28.0106	37.895	25.5767	30.9805	18.8437	21.8446	24.125	21.8801	21.4875	24.5952	42.6446	32.1076	40.2675	24.813	31.4636	40.4158	40.7093	23.7639	40.4999
hsa-miR-26b-3p	21.9914	33.6705	22.3106	34.9614	28.4498	23.5025	24.1366	18.3124	23.4859	18.0592	31.4982	0	31.301	14.5455	29.3684	33.6341	30.7731	33.0195	32.4996	29.576	54.1851	21.3414	20.5716	34.6706	29.716	52.4931	28.5193	23.0284	32.2444	13.9037	24.5952	22.9625	37.9453	23.4894	37.2194	23.1837	20.8203	21.552	15.8426	23.625
hsa-miR-577	21.9914	36.3641	53.5454	32.4641	36.8388	55.6639	34.9564	40.2873	33.8197	27.0887	26.2485	36.2027	35.0273	46.5457	48.9473	42.0426	39.0293	34.5919	54.166	38.0263	19.4511	43.3497	57.3838	32.3971	17.7032	22.8816	43.3858	35.0909	9.21269	31.5992	55.8983	32.8035	18.9726	18.456	45.4904	52.9914	46.5394	31.1306	68.6513	55.6874
hsa-miR-651-5p	21.9914	25.5896	26.7727	9.98896	10.9422	16.0807	13.3167	8.5458	15.9704	9.02958	12.2493	9.05067	17.8863	17.4546	22.3759	12.6128	17.263	18.8683	17.0236	7.394	13.8936	26.0098	9.74443	9.6623	13.2774	16.1517	16.9902	13.1591	10.3643	16.4316	20.1234	13.1214	13.1349	26.845	16.542	21.5278	24.4944	11.9733	26.4044	21.9375
hsa-miR-10527-5p	20.1588	12.1214	11.1553	17.4807	7.65955	11.1328	9.15525	6.10414	6.57605	13.5444	6.9996	18.1013	14.9052	11.6364	8.39096	4.20426	7.50564	15.7236	14.7022	8.45028	10.6518	8.00302	9.74443	7.95719	8.21932	6.0569	7.58492	8.77272	12.6675	6.31984	2.23593	13.1214	11.6755	6.71126	12.4065	9.93588	12.2472	4.78933	2.64044	5.06249
hsa-miR-34c-3p	20.1588	0	2.23106	0	0.364741	0	1.66459	1.22083	0.939436	3.00986	0	0	0	0	2.79699	0	1.50113	1.57236	0	3.16886	2.3156	2.00076	0	1.13674	0.632256	0.672989	9.10191	0	1.15159	7.58381	15.6515	6.56071	2.91887	3.35563	0	3.31196	6.12361	0	0	0
hsa-miR-22-5p	20.1588	14.815	8.92424	22.4752	30.2735	25.9765	32.4595	13.4291	20.6676	13.5444	19.2489	9.05067	24.5936	23.2728	18.1804	33.6341	26.2698	15.7236	15.476	23.2383	13.8936	23.3422	15.158	21.5981	23.3935	21.5356	29.7329	37.284	17.2738	27.8073	11.1797	22.9625	21.8915	31.8785	12.4065	18.2158	24.4944	19.1573	15.8426	25.3125
hsa-miR-301a-3p	20.1588	43.0982	42.3901	37.4586	24.8024	51.3345	29.9626	19.5333	34.7591	31.6035	52.497	36.2027	23.8483	24.7274	36.3608	46.2469	30.0226	42.4537	61.904	23.2383	28.7135	46.6843	42.2259	33.5339	23.3935	18.8437	31.2499	25.2216	23.0317	44.2389	49.1905	36.0839	27.7293	31.8785	41.3549	59.6153	33.0675	28.736	36.9661	43.8749
hsa-miR-1269b	20.1588	1.34682	2.23106	0	5.47111	8.65882	0	0	0	9.02958	66.4962	0	7.45261	13.091	2.79699	0	26.2698	9.43415	37.9162	0	0	0.666919	6.49628	0	0	0.672989	27.9125	6.57954	0	3.79191	2.23593	0	5.83774	0	0	0	0	2.39466	0	0
hsa-miR-455-3p	20.1588	18.8555	11.1553	14.9834	37.5683	16.0807	22.472	20.7541	19.7281	24.0789	6.9996	27.152	15.6505	10.1819	13.9849	46.2469	18.0135	12.5789	22.4402	11.6191	41.6809	18.6737	22.737	21.0297	18.9677	20.1897	17.2936	25.2216	28.7897	8.84778	6.70779	3.28035	20.4321	25.1672	16.542	13.2478	13.4719	9.57866	10.5617	11.8125
hsa-miR-551b-3p	20.1588	40.4046	24.5417	14.9834	18.237	56.9008	38.2856	19.5333	22.5465	45.1479	17.499	72.4054	20.122	30.5456	43.3533	25.2256	45.7844	29.8748	39.4638	46.4766	28.2504	39.3482	55.2184	66.4993	27.187	28.2655	62.4998	41.6704	14.9706	21.4875	22.3593	29.5232	23.3509	35.2341	24.813	28.1517	24.4944	14.368	108.258	30.3749
hsa-miR-191-3p	20.1588	12.1214	13.3864	37.4586	17.8723	12.9882	27.4658	15.8708	19.7281	21.069	17.499	0	22.3578	18.9092	13.9849	16.817	17.263	9.43415	19.345	11.6191	17.5986	14.0053	21.6543	11.9358	17.0709	18.8437	19.114	29.6079	23.0317	15.1676	24.5952	22.9625	24.8104	20.1338	22.7452	23.1837	23.2697	26.3413	13.2022	20.25
hsa-miR-106b-5p	20.1588	8.08092	11.1553	17.4807	15.3191	17.3176	18.3105	12.2083	15.031	18.0592	12.2493	0	9.68839	13.091	13.9849	29.4298	15.0113	18.8683	23.214	11.6191	12.9674	20.0076	22.737	13.0725	15.8064	18.1707	13.6529	16.4488	13.819	26.5433	17.8875	26.2428	7.29717	20.1338	2.06775	6.62392	14.6967	9.57866	15.8426	18.5625
hsa-miR-1843	20.1588	8.08092	11.1553	19.9779	11.307	12.3697	12.4844	12.2083	4.69718	18.0592	17.499	18.1013	20.8673	13.091	11.1879	12.6128	12.009	14.1512	6.9642	20.0694	14.3567	10.0038	10.8271	15.346	17.7032	12.7868	15.1698	12.0625	21.8801	18.9595	11.1797	29.5232	17.5132	15.1003	14.4742	16.5598	7.34833	9.57866	2.64044	18.5625
hsa-miR-23b-5p	20.1588	21.5491	26.7727	12.4862	17.1428	15.4622	20.8074	21.9749	16.9098	15.0493	22.7487	9.05067	25.3389	17.4546	19.5789	16.817	12.7596	12.5789	18.5712	15.8443	23.6192	16.673	19.4889	12.5042	18.9677	16.1517	23.665	9.86931	8.0611	16.4316	26.8312	19.6821	17.5132	20.1338	14.4742	19.8718	20.8203	9.57866	26.4044	20.25
hsa-miR-499a-5p	20.1588	40.4046	24.5417	24.9724	31.0029	37.1092	18.3105	14.6499	20.6676	21.069	22.7487	27.152	9.68839	29.091	16.7819	37.8383	30.0226	29.8748	34.821	15.8443	12.5043	26.6767	41.1431	29.5553	15.1741	15.4787	25.7887	24.125	10.3643	17.6956	35.7749	16.4018	21.8915	26.845	24.813	38.0876	22.045	26.3413	36.9661	25.3125
hsa-miR-1301-3p	20.1588	10.7746	22.3106	24.9724	23.7081	26.595	24.9689	24.4166	19.7281	16.5542	33.2481	36.2027	38.7536	14.5455	34.9623	37.8383	21.7664	39.309	23.9878	29.576	26.3979	28.0106	18.4061	19.893	27.8193	16.8247	28.2159	20.8352	33.396	26.5433	26.8312	19.6821	17.5132	16.7781	22.7452	16.5598	26.9439	28.736	10.5617	25.3125
hsa-miR-652-3p	18.3262	22.8959	13.3864	17.4807	28.085	24.7395	28.298	17.0916	30.0619	21.069	15.7491	9.05067	31.301	8.72731	22.3759	16.817	17.263	15.7236	24.7616	29.576	32.4185	28.0106	25.9851	28.4185	30.3483	21.5356	23.665	24.125	19.577	15.1676	15.6515	32.8035	17.5132	30.2007	22.7452	28.1517	20.8203	14.368	13.2022	20.25
hsa-miR-17-3p	18.3262	17.5087	20.0795	7.49172	16.0486	12.9882	15.8136	18.3124	15.9704	9.02958	20.9988	0	17.141	17.4546	15.3834	21.0213	23.2675	18.8683	16.2498	14.788	22.6929	15.3391	9.74443	17.6195	7.58707	24.9006	31.8567	15.3523	13.819	6.31984	6.70779	6.56071	13.1349	20.1338	14.4742	13.2478	13.4719	28.736	23.7639	8.43749
hsa-miR-892a	18.3262	12.1214	33.4659	9.98896	91.9146	20.4101	19.1428	6.10414	16.9098	61.7021	38.4978	72.4054	50.6777	45.0911	22.3759	67.2682	30.0226	0	41.0114	1.05629	112.075	46.0174	6.49628	26.145	3.79353	19.5167	202.062	8.77272	3.45476	13.9037	4.47186	36.0839	89.0255	8.38907	24.813	74.5191	90.6294	79.0239	337.976	28.6875
hsa-miR-106a-3p	18.3262	20.2023	0	12.4862	11.307	11.7513	4.16148	9.76663	1.87887	3.00986	5.2497	0	5.96209	7.27276	9.78945	16.817	14.2607	15.7236	11.607	4.22514	18.5248	6.66919	6.49628	10.2307	12.0129	20.8626	8.79851	6.57954	19.577	6.31984	13.4156	6.56071	21.8915	20.1338	16.542	11.5919	3.67417	4.78933	5.28087	5.06249
hsa-miR-33a-5p	18.3262	24.2427	11.1553	22.4752	8.02429	9.8958	9.98755	13.4291	13.1521	28.5937	20.9988	0	14.16	20.3637	9.78945	25.2256	12.7596	11.0065	18.5712	9.50657	8.79929	15.3391	7.579	14.2093	20.8644	14.8058	11.2257	14.2557	17.2738	24.0154	22.3593	29.5232	14.5943	21.8116	12.4065	11.5919	9.79778	14.368	13.2022	11.8125
hsa-miR-654-3p	18.3262	5.38728	2.23106	9.98896	1.8237	6.80336	2.49689	3.66249	13.1521	19.5641	13.9992	9.05067	2.23578	4.36366	1.39849	0	15.7619	4.71708	6.1904	26.4071	36.5865	3.33459	7.579	7.38882	12.6451	2.01897	2.12378	8.77272	13.819	12.6397	17.8875	3.28035	11.6755	10.0669	4.13549	13.2478	1.22472	4.78933	0	30.3749
hsa-miR-942-5p	18.3262	14.815	8.92424	9.98896	11.307	9.27731	10.8198	12.2083	8.45492	16.5542	27.9984	18.1013	11.1789	13.091	5.59397	16.817	12.009	7.86179	16.2498	27.4634	6.94681	6.66919	20.5716	9.6623	6.95481	4.71092	13.3495	24.125	10.3643	31.5992	6.70779	32.8035	5.83774	13.4225	8.27099	8.2799	11.0225	9.57866	10.5617	20.25
hsa-miR-508-3p	18.3262	22.8959	4.46212	22.4752	40.8509	21.0286	3.32918	4.88331	27.2436	3.00986	3.4998	18.1013	23.1031	14.5455	6.99247	25.2256	9.00677	22.013	23.214	19.0131	34.2709	14.6722	5.41357	10.799	12.6451	6.0569	15.4732	37.284	8.0611	16.4316	26.8312	3.28035	14.5943	3.35563	20.6775	4.96794	25.7192	2.39466	7.92131	5.06249
hsa-miR-223-3p	18.3262	82.156	58.0076	107.381	162.674	14.2252	44.944	48.8331	222.646	10.5345	66.4962	18.1013	49.9325	10.1819	23.7744	71.4724	13.5102	268.873	88.2132	123.585	267.221	64.0242	189.475	151.755	266.18	8.74885	61.5896	30.7045	84.0658	3354.57	29.0671	6.56071	159.078	3.35563	95.1163	11.5919	124.922	727.978	29.0448	32.0624
hsa-miR-133a-3p	18.3262	0	0	0	0.729481	0	0	0	0	0	0	0	0	0	0	0	0	0	0	0	0	0	2.16543	0	0.632256	0	0	0	0	0	0	0	0	0	0	0	0	0	0	0
hsa-miR-148a-5p	16.4936	13.4682	4.46212	17.4807	10.9422	12.9882	14.9813	9.76663	8.45492	6.01972	6.9996	9.05067	11.9242	10.1819	13.9849	4.20426	8.25621	31.4472	12.3808	10.5629	21.3036	18.0068	14.0753	11.9358	14.5419	25.5736	11.5291	8.77272	33.396	16.4316	17.8875	16.4018	16.0538	13.4225	16.542	8.2799	14.6967	14.368	2.64044	8.43749
hsa-miR-424-3p	16.4936	9.42774	15.6174	9.98896	24.0729	27.2134	9.15525	20.7541	13.1521	25.5838	13.9992	9.05067	39.4988	11.6364	37.7593	16.817	20.2652	17.2959	19.345	26.4071	11.1149	20.0076	14.0753	11.9358	10.7483	18.1707	26.6989	24.125	27.6381	11.3757	20.1234	13.1214	36.4859	21.8116	12.4065	21.5278	26.9439	11.9733	7.92131	30.3749
hsa-miR-1269a	16.4936	6.7341	22.3106	22.4752	32.4619	15.4622	49.1054	61.0414	66.6999	0	0	0	11.1789	0	6.99247	12.6128	12.009	23.5854	0	27.4634	77.3412	21.3414	3.24814	17.0511	137.832	10.0948	0	19.7386	61.0341	26.5433	8.94373	3.28035	7.29717	11.7447	35.1517	48.0234	14.6967	2.39466	21.1235	47.2499
hsa-miR-1270	16.4936	29.63	20.0795	37.4586	39.392	39.5832	24.9689	23.1957	28.1831	21.069	31.4982	18.1013	33.5367	8.72731	16.7819	46.2469	32.2743	29.8748	16.2498	34.8574	24.0823	26.0098	63.8801	27.2818	38.5676	16.1517	20.9344	31.8011	14.9706	13.9037	13.4156	29.5232	14.5943	23.4894	24.813	18.2158	17.1461	19.1573	18.483	15.1875
hsa-miR-1271-5p	16.4936	13.4682	11.1553	2.49724	12.4012	9.8958	13.3167	10.9875	3.75774	9.02958	8.7495	18.1013	8.19787	10.1819	2.79699	0	12.009	7.86179	10.0594	16.9006	13.8936	8.00302	14.0753	12.5042	10.1161	10.7678	11.8325	6.57954	5.75793	3.79191	0	9.84106	7.29717	3.35563	6.20324	3.31196	2.44944	7.18399	7.92131	0
hsa-miR-190b-5p	16.4936	36.3641	11.1553	42.4531	24.0729	11.7513	15.8136	10.9875	11.2732	21.069	26.2485	226.267	27.5746	16.0001	8.39096	50.4511	16.5124	26.7301	25.5354	26.4071	18.5248	10.0038	10.8271	31.2604	8.21932	16.1517	14.5631	18.642	13.819	31.5992	111.797	19.6821	42.3236	11.7447	22.7452	21.5278	11.0225	38.3146	108.258	64.1249
hsa-miR-509-3p	16.4936	14.815	4.46212	29.9669	47.4163	35.2538	4.16148	7.32497	27.2436	0	15.7491	18.1013	20.122	27.6365	5.59397	42.0426	12.009	25.1577	34.821	13.7317	37.9759	16.006	28.1506	18.1879	10.1161	8.07586	14.5631	20.8352	11.5159	12.6397	29.0671	6.56071	13.1349	6.71126	8.27099	28.1517	29.3933	7.18399	13.2022	23.625
hsa-miR-31-3p	16.4936	20.2023	17.8485	2.49724	17.1428	9.27731	39.1179	18.3124	23.4859	18.0592	12.2493	18.1013	20.122	7.27276	25.1729	25.2256	11.2585	9.43415	17.0236	19.0131	12.9674	19.3406	19.4889	21.5981	20.2322	11.4408	15.7766	24.125	14.9706	77.1021	2.23593	3.28035	8.75661	6.71126	6.20324	9.93588	11.0225	14.368	5.28087	8.43749
hsa-miR-181c-3p	14.6609	16.1618	8.92424	2.49724	9.48325	15.4622	15.8136	18.3124	15.9704	15.0493	10.4994	9.05067	8.19787	2.9091	8.39096	16.817	18.0135	11.0065	6.9642	9.50657	16.2092	18.0068	11.9099	39.2176	33.5096	12.1138	9.10191	21.9318	8.0611	7.58381	4.47186	6.56071	7.29717	11.7447	16.542	11.5919	14.6967	9.57866	7.92131	16.875
hsa-miR-501-5p	14.6609	28.2832	13.3864	9.98896	31.7324	26.595	24.1366	32.9624	22.5465	15.0493	26.2485	36.2027	40.9893	27.6365	15.3834	12.6128	28.5214	22.013	22.4402	20.0694	19.4511	25.3429	28.1506	22.1664	13.2774	16.1517	32.4635	17.5454	14.9706	10.1118	13.4156	13.1214	17.5132	48.6566	18.6097	21.5278	36.7417	9.57866	21.1235	15.1875
hsa-miR-378d	14.6609	13.4682	4.46212	12.4862	14.9544	17.9361	9.98755	9.76663	18.7887	9.02958	8.7495	9.05067	9.68839	17.4546	16.7819	4.20426	17.263	17.2959	8.5118	17.9569	18.0617	16.673	5.41357	10.799	12.6451	16.1517	17.9004	8.77272	9.21269	44.2389	6.70779	9.84106	16.0538	10.0669	8.27099	8.2799	9.79778	2.39466	10.5617	13.5
hsa-miR-92b-5p	14.6609	18.8555	24.5417	24.9724	18.6018	21.0286	28.298	13.4291	23.4859	22.5739	24.4986	54.304	26.0841	30.5456	12.5864	25.2256	18.7641	17.2959	23.9878	29.576	6.02057	24.0091	42.2259	17.0511	19.5999	10.7678	25.7887	18.642	10.3643	16.4316	33.539	36.0839	29.1887	23.4894	18.6097	13.2478	23.2697	21.552	18.483	11.8125
hsa-miR-2116-3p	14.6609	13.4682	22.3106	4.99448	13.4954	17.3176	8.32296	18.3124	11.2732	9.02958	29.7483	18.1013	29.0652	8.72731	22.3759	12.6128	22.5169	20.4407	23.214	21.1257	6.02057	8.66994	14.0753	17.0511	18.9677	12.7868	9.10191	16.4488	19.577	17.6956	22.3593	26.2428	17.5132	1.67781	12.4065	14.9038	12.2472	21.552	13.2022	23.625
hsa-miR-15b-3p	14.6609	32.3237	15.6174	19.9779	18.9665	14.2252	14.9813	32.9624	16.9098	6.01972	31.4982	0	15.6505	14.5455	12.5864	12.6128	14.2607	9.43415	18.5712	23.2383	24.0823	17.3399	27.0679	23.8716	17.7032	22.2086	21.2378	23.0284	23.0317	29.0713	8.94373	16.4018	14.5943	23.4894	10.3387	13.2478	14.6967	9.57866	18.483	11.8125
hsa-miR-760	14.6609	16.1618	11.1553	12.4862	7.65955	9.8958	22.472	9.76663	20.6676	19.5641	6.9996	27.152	21.6126	11.6364	11.1879	12.6128	12.7596	6.28943	13.9284	16.9006	12.5043	14.6722	20.5716	19.3246	21.4967	8.07586	9.40531	8.77272	9.21269	10.1118	24.5952	13.1214	10.216	20.1338	22.7452	11.5919	12.2472	26.3413	13.2022	11.8125
hsa-miR-30c-1-3p	14.6609	20.2023	26.7727	22.4752	27.3555	22.884	19.9751	21.9749	18.7887	30.0986	27.9984	27.152	31.301	26.1819	16.7819	8.40852	24.7686	14.1512	14.7022	14.788	22.6929	28.6775	18.4061	28.9869	15.8064	22.2086	29.1261	16.4488	17.2738	11.3757	11.1797	22.9625	17.5132	33.5563	12.4065	48.0234	29.3933	31.1306	21.1235	27
hsa-miR-129-5p	14.6609	33.6705	13.3864	14.9834	25.1671	27.2134	13.3167	39.0665	14.0915	30.0986	27.9984	9.05067	38.7536	23.2728	22.3759	16.817	26.2698	23.5854	34.0472	34.8574	35.6603	42.6828	36.8123	28.9869	27.187	15.4787	17.597	42.767	10.3643	13.9037	33.539	16.4018	20.4321	36.9119	24.813	13.2478	33.0675	28.736	21.1235	27
hsa-miR-146b-3p	14.6609	21.5491	13.3864	14.9834	21.5197	20.4101	19.9751	23.1957	24.4253	18.0592	15.7491	9.05067	23.1031	17.4546	15.3834	21.0213	19.5147	23.5854	19.345	19.0131	16.2092	22.0083	20.5716	15.9144	13.9096	10.0948	18.2038	5.48295	14.9706	7.58381	22.3593	13.1214	29.1887	30.2007	14.4742	36.4316	18.3708	19.1573	18.483	16.875
hsa-miR-187-5p	14.6609	5.38728	6.69318	12.4862	34.2856	11.7513	12.4844	15.8708	16.9098	7.52465	20.9988	9.05067	24.5936	30.5456	5.59397	50.4511	18.0135	6.28943	8.5118	11.6191	10.1887	16.006	10.8271	16.4827	5.6903	4.71092	38.8348	9.86931	18.4254	16.4316	17.8875	26.2428	20.4321	15.1003	10.3387	28.1517	25.7192	26.3413	63.3704	10.125
hsa-miR-505-5p	14.6609	8.08092	20.0795	17.4807	15.6838	12.9882	13.3167	18.3124	24.4253	12.0394	26.2485	18.1013	20.122	27.6365	13.9849	29.4298	14.2607	17.2959	13.9284	20.0694	18.5248	12.0045	23.8197	18.7562	17.7032	10.0948	11.8325	9.86931	13.819	18.9595	13.4156	16.4018	18.9726	10.0669	22.7452	19.8718	19.5956	21.552	0	8.43749
hsa-miR-653-3p	14.6609	28.2832	26.7727	22.4752	60.1822	56.2824	27.4658	32.9624	15.031	22.5739	17.499	18.1013	55.8946	46.5457	26.5714	33.6341	63.0474	25.1577	26.3092	15.8443	13.8936	35.3467	18.4061	64.2259	5.6903	13.4598	30.0363	30.7045	18.4254	45.5029	53.6624	39.3642	48.1613	36.9119	43.4227	18.2158	55.1125	50.288	76.5726	43.8749
hsa-miR-376c-3p	12.8283	0	0	0	0	0	0	0	1.87887	3.00986	1.7499	18.1013	0	4.36366	1.39849	0	3.75282	0	3.869	3.16886	18.988	1.33384	0	0.56837	1.26451	0	0.303397	2.19318	2.30317	1.26397	2.23593	0	1.45943	6.71126	2.06775	1.65598	0	2.39466	0	6.74999
hsa-miR-181c-5p	12.8283	8.08092	13.3864	7.49172	4.74163	5.56639	12.4844	2.44166	7.51549	1.50493	1.7499	0	2.23578	0	6.99247	4.20426	12.7596	11.0065	5.4166	8.45028	7.40993	6.00227	5.41357	17.6195	16.4386	6.0569	6.67473	7.67613	9.21269	8.84778	4.47186	6.56071	2.91887	6.71126	0	3.31196	8.57305	4.78933	0	3.37499
hsa-miR-628-5p	12.8283	20.2023	33.4659	19.9779	29.1792	24.121	29.9626	35.404	27.2436	25.5838	22.7487	18.1013	42.4799	33.4547	23.7744	21.0213	35.2765	22.013	29.4044	20.0694	25.4716	32.679	35.7296	37.5125	13.9096	31.6305	47.0265	43.8636	38.0024	31.5992	64.842	16.4018	27.7293	23.4894	33.0839	29.8077	39.1911	26.3413	23.7639	20.25
hsa-miR-1261	12.8283	0	0	19.9779	0.364741	21.0286	1.66459	1.22083	2.81831	6.01972	0	0	5.96209	7.27276	8.39096	0	0.750564	15.7236	0.7738	1.05629	1.38936	9.33686	1.08271	2.84185	3.16128	14.1328	0.910191	12.0625	0	5.05588	2.23593	0	1.45943	0	0	0	1.22472	0	0	0
hsa-miR-7704	12.8283	13.4682	2.23106	9.98896	1.09422	4.32941	2.49689	10.9875	8.45492	12.0394	3.4998	9.05067	0.745261	5.81821	16.7819	0	5.25395	14.1512	3.869	10.5629	25.0085	5.33535	0	7.38882	10.1161	27.5925	5.46115	4.38636	14.9706	3.79191	11.1797	3.28035	7.29717	5.03344	6.20324	3.31196	7.34833	2.39466	2.64044	3.37499
hsa-let-7f-2-3p	12.8283	14.815	4.46212	12.4862	13.4954	14.2252	6.65836	4.88331	16.9098	9.02958	15.7491	0	10.4337	10.1819	18.1804	4.20426	12.7596	17.2959	15.476	7.394	10.6518	15.3391	3.24814	11.9358	20.8644	21.5356	20.9344	13.1591	20.7286	5.05588	15.6515	3.28035	13.1349	6.71126	6.20324	11.5919	9.79778	11.9733	21.1235	10.125
hsa-let-7e-3p	12.8283	12.1214	17.8485	9.98896	17.8723	18.5546	16.6459	7.32497	23.4859	15.0493	6.9996	0	14.9052	11.6364	6.99247	8.40852	15.0113	12.5789	23.214	13.7317	18.988	22.0083	18.4061	19.3246	20.8644	11.4408	14.5631	8.77272	9.21269	5.05588	20.1234	16.4018	10.216	15.1003	16.542	14.9038	18.3708	19.1573	13.2022	8.43749
hsa-miR-4497	12.8283	6.7341	2.23106	14.9834	5.10637	8.65882	0.832296	20.7541	8.45492	4.51479	1.7499	0	7.45261	4.36366	5.59397	0	3.75282	3.14472	3.869	8.45028	24.0823	3.33459	1.08271	5.6837	12.6451	18.1707	4.85435	7.67613	12.6675	5.05588	0	3.28035	14.5943	5.03344	37.2194	1.65598	6.12361	4.78933	2.64044	1.6875
hsa-miR-382-5p	12.8283	13.4682	13.3864	12.4862	6.20059	7.42185	5.82607	7.32497	20.6676	13.5444	24.4986	9.05067	6.70735	33.4547	0	0	20.2652	3.14472	3.869	16.9006	59.7426	6.00227	12.9926	10.799	17.0709	2.01897	2.12378	10.9659	10.3643	10.1118	11.1797	6.56071	16.0538	8.38907	8.27099	19.8718	4.89889	7.18399	2.64044	33.7499
hsa-miR-3679-5p	12.8283	2.69364	4.46212	7.49172	4.74163	3.71092	1.66459	4.88331	9.39436	4.51479	6.9996	9.05067	11.1789	2.9091	12.5864	0	2.25169	4.71708	3.869	6.33771	4.16809	3.33459	4.33086	5.11533	3.79353	1.34598	3.64076	6.57954	4.60635	5.05588	4.47186	9.84106	1.45943	3.35563	2.06775	3.31196	3.67417	2.39466	0	8.43749
hsa-miR-548ad-5p	10.9957	17.5087	20.0795	9.98896	19.3312	20.4101	14.9813	19.5333	19.7281	18.0592	24.4986	9.05067	14.9052	20.3637	15.3834	21.0213	15.0113	9.43415	23.9878	17.9569	11.1149	17.3399	28.1506	15.9144	18.9677	8.74885	16.9902	14.2557	16.1222	22.7514	22.3593	9.84106	5.83774	20.1338	22.7452	23.1837	19.5956	9.57866	15.8426	13.5
hsa-miR-27a-5p	10.9957	16.1618	11.1553	4.99448	20.7902	12.3697	18.3105	8.5458	15.031	15.0493	10.4994	18.1013	14.16	11.6364	2.79699	21.0213	17.263	18.8683	16.2498	15.8443	6.02057	11.3376	20.5716	8.52556	10.7483	6.72989	13.9563	7.67613	17.2738	16.4316	6.70779	13.1214	24.8104	26.845	8.27099	14.9038	18.3708	9.57866	13.2022	11.8125
hsa-miR-342-5p	10.9957	4.04046	4.46212	4.99448	5.47111	4.9479	8.32296	4.88331	8.45492	6.01972	6.9996	18.1013	7.45261	2.9091	4.19548	0	8.25621	3.14472	3.869	4.22514	5.09433	2.66767	4.33086	1.13674	3.79353	5.38391	6.06794	3.28977	4.60635	0	4.47186	6.56071	2.91887	6.71126	10.3387	3.31196	3.67417	4.78933	0	10.125
hsa-miR-32-3p	10.9957	8.08092	8.92424	12.4862	10.5775	6.18487	9.98755	2.44166	12.2127	3.00986	12.2493	0	10.4337	14.5455	8.39096	8.40852	12.009	12.5789	10.8332	6.33771	5.55745	7.3361	8.66171	11.9358	12.6451	10.7678	7.88832	15.3523	5.75793	13.9037	11.1797	16.4018	1.45943	10.0669	6.20324	11.5919	15.9214	9.57866	13.2022	10.125
hsa-miR-3200-3p	10.9957	12.1214	4.46212	2.49724	6.56533	11.1328	5.82607	13.4291	4.69718	18.0592	6.9996	9.05067	4.47156	7.27276	2.79699	0	4.50339	7.86179	10.0594	15.8443	18.0617	6.66919	7.579	13.6409	11.3806	13.4598	8.19172	3.28977	6.90952	5.05588	4.47186	3.28035	8.75661	11.7447	6.20324	1.65598	4.89889	2.39466	5.28087	10.125
hsa-miR-130b-3p	10.9957	5.38728	6.69318	14.9834	10.5775	4.32941	9.98755	10.9875	4.69718	10.5345	12.2493	9.05067	6.70735	5.81821	15.3834	8.40852	8.25621	7.86179	13.9284	14.788	12.9674	10.6707	3.24814	9.6623	12.6451	19.5167	10.3155	12.0625	9.21269	20.2235	6.70779	9.84106	7.29717	11.7447	14.4742	3.31196	8.57305	4.78933	7.92131	8.43749
hsa-miR-4728-3p	10.9957	9.42774	22.3106	7.49172	3.64741	14.2252	23.3043	15.8708	19.7281	10.5345	33.2481	45.2533	18.6315	32.0001	13.9849	29.4298	14.2607	9.43415	19.345	14.788	2.3156	14.6722	21.6543	11.3674	14.5419	3.36494	15.1698	15.3523	10.3643	8.84778	20.1234	52.4856	18.9726	25.1672	26.8807	18.2158	26.9439	26.3413	15.8426	27
hsa-miR-26a-2-3p	10.9957	21.5491	20.0795	14.9834	14.9544	16.6992	16.6459	28.0791	16.9098	19.5641	17.499	36.2027	17.8863	16.0001	12.5864	25.2256	19.5147	9.43415	17.0236	13.7317	13.8936	14.0053	16.2407	25.0083	16.4386	20.8626	19.4174	16.4488	17.2738	22.7514	22.3593	36.0839	27.7293	38.5897	16.542	19.8718	23.2697	26.3413	31.6852	10.125
hsa-miR-374b-3p	10.9957	10.7746	13.3864	22.4752	9.48325	11.1328	9.15525	10.9875	8.45492	22.5739	17.499	9.05067	18.6315	24.7274	18.1804	4.20426	17.263	4.71708	13.1546	8.45028	18.0617	16.673	12.9926	20.4613	15.1741	9.42184	15.4732	13.1591	11.5159	24.0154	13.4156	16.4018	8.75661	13.4225	18.6097	16.5598	18.3708	21.552	23.7639	16.875
hsa-miR-4508	10.9957	2.69364	0	9.98896	0.364741	2.47395	3.32918	6.10414	4.69718	3.00986	3.4998	9.05067	4.47156	4.36366	0	4.20426	3.00226	6.28943	3.869	3.16886	2.77872	3.33459	4.33086	1.13674	6.95481	4.03793	3.33737	2.19318	8.0611	8.84778	2.23593	3.28035	2.91887	0	4.13549	1.65598	4.89889	0	0	1.6875
hsa-miR-887-3p	10.9957	2.69364	2.23106	2.49724	7.65955	11.7513	12.4844	10.9875	10.3338	6.01972	13.9992	0	5.21683	8.72731	8.39096	4.20426	11.2585	4.71708	10.8332	7.394	7.87305	2.66767	16.2407	8.52556	5.6903	7.40288	11.2257	3.28977	2.30317	5.05588	4.47186	3.28035	2.91887	6.71126	12.4065	3.31196	6.12361	4.78933	2.64044	8.43749
hsa-miR-18a-5p	10.9957	9.42774	13.3864	7.49172	10.2127	11.1328	9.98755	7.32497	8.45492	7.52465	12.2493	9.05067	8.19787	4.36366	11.1879	12.6128	6.00452	12.5789	10.0594	8.45028	11.578	10.0038	8.66171	6.25208	10.7483	8.07586	6.06794	19.7386	8.0611	10.1118	13.4156	6.56071	8.75661	11.7447	14.4742	4.96794	9.79778	4.78933	5.28087	5.06249
hsa-miR-411-5p	10.9957	10.7746	2.23106	7.49172	2.91792	3.71092	4.99377	3.66249	13.1521	9.02958	12.2493	0	5.21683	11.6364	4.19548	4.20426	11.2585	3.14472	7.738	8.45028	40.7546	4.66843	7.579	6.82045	12.0129	0.672989	1.82038	7.67613	6.90952	10.1118	11.1797	13.1214	14.5943	10.0669	16.542	8.2799	1.22472	0	0	15.1875
hsa-miR-486-5p	10.9957	6.7341	55.7765	19.9779	13.4954	19.1731	22.472	12.2083	112.732	12.0394	5.2497	9.05067	29.8104	5.81821	15.3834	4.20426	15.7619	33.0195	20.8926	30.6323	12.5043	22.6752	14.0753	14.2093	13.2774	14.8058	54.3081	6.57954	21.8801	79.63	176.639	3.28035	21.8915	15.1003	12.4065	8.2799	25.7192	11.9733	10.5617	37.1249
hsa-miR-7706	10.9957	1.34682	0	7.49172	2.91792	3.71092	13.3167	6.10414	12.2127	1.50493	13.9992	9.05067	7.45261	8.72731	6.99247	4.20426	2.25169	12.5789	5.4166	8.45028	1.85248	6.66919	3.24814	6.25208	6.95481	4.03793	6.37134	4.38636	1.15159	26.5433	0	6.56071	7.29717	3.35563	4.13549	6.62392	3.67417	9.57866	2.64044	1.6875
hsa-miR-143-3p	10.9957	6.7341	8.92424	12.4862	16.7781	9.27731	9.98755	7.32497	22.5465	9.02958	15.7491	9.05067	11.9242	7.27276	54.5412	8.40852	11.2585	18.8683	17.0236	69.7148	18.0617	10.0038	7.579	28.9869	9.48384	8.07586	7.58492	4.38636	11.5159	125.133	2.23593	13.1214	14.5943	5.03344	4.13549	3.31196	8.57305	35.92	10.5617	5.06249
hsa-miR-1287-5p	10.9957	13.4682	8.92424	7.49172	10.5775	12.9882	9.98755	10.9875	21.607	21.069	24.4986	0	17.8863	16.0001	18.1804	25.2256	14.2607	11.0065	15.476	14.788	17.1355	18.6737	12.9926	11.9358	12.0129	15.4787	11.8325	23.0284	28.7897	32.8632	17.8875	16.4018	16.0538	16.7781	18.6097	13.2478	11.0225	11.9733	5.28087	15.1875
hsa-miR-664b-5p	10.9957	10.7746	11.1553	9.98896	8.38903	8.65882	16.6459	15.8708	17.8493	28.5937	22.7487	9.05067	14.16	5.81821	13.9849	21.0213	12.009	9.43415	10.0594	15.8443	10.1887	10.0038	10.8271	9.09393	12.0129	4.71092	11.8325	10.9659	13.819	8.84778	13.4156	6.56071	14.5943	10.0669	16.542	13.2478	8.57305	19.1573	10.5617	10.125
hsa-miR-379-5p	10.9957	10.7746	0	9.98896	2.55318	3.09244	0	4.88331	9.39436	7.52465	12.2493	0	2.23578	13.091	6.99247	0	11.2585	3.14472	2.3214	6.33771	30.1028	3.33459	4.33086	6.82045	10.1161	3.36494	0.910191	9.86931	10.3643	6.31984	17.8875	0	4.3783	10.0669	8.27099	9.93588	3.67417	2.39466	0	20.25
hsa-miR-142-3p	10.9957	37.7109	24.5417	59.9338	41.2157	14.2252	19.1428	7.32497	57.3056	4.51479	26.2485	9.05067	16.3957	8.72731	13.9849	37.8383	6.75508	56.6049	21.6664	31.6886	56.9639	36.0136	35.7296	32.3971	62.5933	12.1138	23.9684	8.77272	25.3349	1080.69	11.1797	6.56071	35.0264	8.38907	26.8807	13.2478	31.8428	165.232	15.8426	20.25
hsa-miR-513c-5p	10.9957	4.04046	2.23106	4.99448	8.02429	3.71092	3.32918	1.22083	8.45492	1.50493	1.7499	18.1013	5.96209	5.81821	2.79699	8.40852	3.75282	4.71708	4.6428	3.16886	3.70497	3.33459	7.579	1.70511	1.26451	2.69195	2.12378	6.57954	4.60635	12.6397	4.47186	3.28035	8.75661	3.35563	10.3387	3.31196	9.79778	4.78933	5.28087	0
hsa-miR-335-3p	10.9957	18.8555	20.0795	17.4807	33.9209	43.9126	30.7949	20.7541	14.0915	21.069	6.9996	9.05067	46.9514	10.1819	34.9623	0	30.7731	29.8748	16.2498	22.182	23.6192	24.0091	37.895	17.6195	19.5999	20.8626	11.8325	8.77272	9.21269	13.9037	8.94373	3.28035	20.4321	18.456	24.813	26.4957	13.4719	16.7627	5.28087	6.74999
hsa-miR-9983-3p	10.9957	2.69364	0	4.99448	1.45896	0.618487	0	0	6.57605	0	0	0	0	0	1.39849	0	3.00226	6.28943	0.7738	1.05629	0.926242	1.33384	2.16543	0	0.632256	2.01897	1.51698	4.38636	0	0	0	3.28035	0	0	0	3.31196	1.22472	0	0	0
hsa-miR-221-5p	9.16309	4.04046	8.92424	2.49724	25.1671	12.3697	6.65836	12.2083	9.39436	12.0394	6.9996	18.1013	14.16	13.091	6.99247	0	15.0113	4.71708	7.738	7.394	9.26242	12.6715	10.8271	2.84185	8.85158	8.74885	25.4853	7.67613	2.30317	31.5992	13.4156	9.84106	7.29717	11.7447	8.27099	9.93588	12.2472	9.57866	18.483	10.125
hsa-miR-29a-5p	9.16309	6.7341	6.69318	2.49724	8.38903	8.04034	12.4844	8.5458	7.51549	7.52465	1.7499	0	5.21683	5.81821	6.99247	16.817	3.75282	9.43415	9.2856	5.28143	5.09433	14.0053	15.158	9.09393	12.0129	7.40288	10.9223	9.86931	9.21269	6.31984	8.94373	3.28035	2.91887	3.35563	16.542	16.5598	9.79778	16.7627	7.92131	10.125
hsa-miR-296-5p	9.16309	4.04046	4.46212	2.49724	2.18844	3.09244	5.82607	4.88331	4.69718	13.5444	1.7499	0	5.21683	4.36366	16.7819	4.20426	12.009	9.43415	1.5476	7.394	2.77872	4.00151	6.49628	3.97859	4.42579	2.69195	6.06794	2.19318	4.60635	2.52794	6.70779	6.56071	1.45943	8.38907	0	8.2799	7.34833	7.18399	2.64044	5.06249
hsa-miR-625-5p	9.16309	13.4682	6.69318	17.4807	12.4012	3.71092	17.4782	17.0916	12.2127	10.5345	6.9996	0	9.68839	5.81821	15.3834	8.40852	5.25395	6.28943	10.8332	9.50657	16.6723	7.3361	14.0753	7.95719	15.1741	9.42184	9.7087	8.77272	8.0611	32.8632	6.70779	6.56071	11.6755	6.71126	2.06775	11.5919	12.2472	11.9733	2.64044	1.6875
hsa-miR-376a-3p	9.16309	5.38728	0	14.9834	2.18844	1.85546	2.49689	1.22083	2.81831	1.50493	1.7499	0	0.745261	7.27276	0	0	9.00677	1.57236	1.5476	7.394	29.1766	1.33384	6.49628	2.27348	6.32256	0.672989	1.21359	4.38636	3.45476	7.58381	4.47186	0	7.29717	5.03344	4.13549	6.62392	1.22472	2.39466	0	10.125
hsa-miR-450a-1-3p	9.16309	10.7746	15.6174	17.4807	12.0364	9.8958	1.66459	8.5458	6.57605	9.02958	6.9996	9.05067	9.68839	8.72731	16.7819	0	9.75734	7.86179	19.345	11.6191	3.24185	7.3361	9.74443	3.97859	5.05805	5.38391	9.40531	5.48295	5.75793	1.26397	13.4156	3.28035	4.3783	10.0669	12.4065	6.62392	12.2472	9.57866	10.5617	8.43749
hsa-miR-188-5p	9.16309	12.1214	11.1553	4.99448	13.8601	24.121	12.4844	15.8708	8.45492	4.51479	10.4994	18.1013	12.6694	13.091	9.78945	8.40852	16.5124	12.5789	14.7022	6.33771	10.1887	12.6715	8.66171	15.346	8.21932	14.8058	16.6868	14.2557	6.90952	8.84778	11.1797	6.56071	11.6755	13.4225	14.4742	19.8718	9.79778	7.18399	5.28087	5.06249
hsa-miR-196a-3p	9.16309	2.69364	6.69318	4.99448	26.6261	14.8437	14.9813	15.8708	10.3338	4.51479	12.2493	0	14.9052	7.27276	2.79699	0	15.0113	6.28943	17.0236	1.05629	9.72554	9.33686	6.49628	7.38882	5.6903	21.5356	2.73057	6.57954	4.60635	12.6397	4.47186	13.1214	27.7293	10.0669	2.06775	8.2799	3.67417	0	21.1235	6.74999
hsa-miR-98-3p	9.16309	18.8555	8.92424	9.98896	10.5775	14.8437	6.65836	9.76663	15.031	12.0394	6.9996	18.1013	7.45261	14.5455	9.78945	12.6128	15.0113	17.2959	17.7974	10.5629	11.1149	6.00227	15.158	11.9358	6.32256	11.4408	10.6189	13.1591	10.3643	8.84778	13.4156	16.4018	5.83774	16.7781	18.6097	6.62392	13.4719	9.57866	13.2022	8.43749
hsa-let-7i-3p	9.16309	25.5896	17.8485	14.9834	14.5896	12.9882	22.472	7.32497	16.9098	27.0887	12.2493	9.05067	18.6315	10.1819	13.9849	16.817	14.2607	14.1512	15.476	21.1257	15.283	16.006	8.66171	20.4613	24.658	16.1517	18.2038	20.8352	11.5159	15.1676	13.4156	9.84106	10.216	20.1338	10.3387	19.8718	8.57305	23.9466	7.92131	8.43749
hsa-let-7c-3p	9.16309	16.1618	15.6174	22.4752	12.4012	16.6992	8.32296	13.4291	4.69718	9.02958	8.7495	18.1013	11.1789	14.5455	13.9849	16.817	18.7641	25.1577	15.476	13.7317	21.7667	11.3376	10.8271	15.9144	15.8064	23.5546	19.4174	19.7386	28.7897	5.05588	26.8312	9.84106	11.6755	13.4225	22.7452	13.2478	13.4719	14.368	26.4044	13.5
hsa-let-7g-3p	9.16309	4.04046	2.23106	4.99448	4.37689	2.47395	3.32918	6.10414	6.57605	1.50493	1.7499	0	2.98104	2.9091	8.39096	0	6.00452	3.14472	0.7738	0	5.55745	5.33535	3.24814	4.54696	3.79353	3.36494	5.46115	3.28977	4.60635	2.52794	2.23593	3.28035	4.3783	0	8.27099	4.96794	2.44944	0	2.64044	3.37499
hsa-miR-370-3p	9.16309	2.69364	2.23106	7.49172	0.729481	1.85546	0	4.88331	6.57605	7.52465	6.9996	0	1.49052	7.27276	0	0	4.50339	4.71708	3.0952	4.22514	22.6929	1.33384	3.24814	2.27348	10.7483	0	0.606794	5.48295	4.60635	3.79191	6.70779	3.28035	4.3783	3.35563	6.20324	0	2.44944	0	0	6.74999
hsa-miR-6747-3p	9.16309	5.38728	0	0	2.18844	8.04034	3.32918	6.10414	4.69718	4.51479	6.9996	0	7.45261	2.9091	2.79699	8.40852	4.50339	4.71708	2.3214	5.28143	0.926242	6.00227	5.41357	4.54696	5.6903	3.36494	5.46115	6.57954	8.0611	5.05588	2.23593	3.28035	4.3783	6.71126	4.13549	1.65598	7.34833	0	2.64044	3.37499
hsa-miR-330-5p	9.16309	1.34682	2.23106	14.9834	3.64741	6.18487	8.32296	6.10414	4.69718	9.02958	5.2497	27.152	8.19787	7.27276	4.19548	8.40852	3.75282	9.43415	3.869	5.28143	3.70497	7.3361	3.24814	7.38882	8.21932	4.71092	7.28153	9.86931	13.819	15.1676	6.70779	9.84106	5.83774	5.03344	8.27099	3.31196	6.12361	2.39466	7.92131	11.8125
hsa-miR-582-5p	9.16309	9.42774	13.3864	7.49172	7.29481	9.8958	5.82607	4.88331	6.57605	10.5345	19.2489	9.05067	10.4337	10.1819	11.1879	4.20426	11.2585	9.43415	13.1546	7.394	7.87305	12.0045	12.9926	8.52556	10.7483	6.0569	8.49511	20.8352	2.30317	20.2235	22.3593	0	11.6755	8.38907	10.3387	8.2799	18.3708	14.368	23.7639	10.125
hsa-miR-516a-5p	9.16309	2.69364	2.23106	4.99448	0.729481	0.618487	2.49689	0	3.75774	1.50493	0	9.05067	5.96209	4.36366	0	4.20426	3.00226	1.57236	0.7738	2.11257	0.926242	1.33384	2.16543	0	3.16128	2.01897	3.64076	17.5454	11.5159	0	0	3.28035	10.216	5.03344	4.13549	3.31196	0	4.78933	0	15.1875
hsa-miR-3913-5p	9.16309	8.08092	2.23106	2.49724	2.91792	6.80336	5.82607	2.44166	5.63661	3.00986	0	0	4.47156	2.9091	2.79699	4.20426	8.25621	0	3.0952	8.45028	6.48369	5.33535	8.66171	9.6623	5.05805	7.40288	3.64076	7.67613	4.60635	6.31984	8.94373	9.84106	2.91887	3.35563	4.13549	4.96794	2.44944	2.39466	0	6.74999
hsa-miR-450a-5p	9.16309	4.04046	8.92424	4.99448	8.02429	4.32941	2.49689	3.66249	3.75774	6.01972	17.499	9.05067	7.45261	11.6364	16.7819	4.20426	6.00452	6.28943	9.2856	5.28143	0.463121	2.00076	7.579	3.41022	1.89677	4.71092	5.76454	5.48295	6.90952	5.05588	11.1797	13.1214	16.0538	11.7447	8.27099	6.62392	6.12361	11.9733	2.64044	3.37499
hsa-miR-618	7.33047	0	0	0	0.729481	3.09244	0.832296	0	0.939436	4.51479	3.4998	0	1.49052	0	1.39849	4.20426	1.50113	3.14472	1.5476	0	1.38936	1.33384	0	1.70511	0	0	2.42718	0	0	0	2.23593	3.28035	1.45943	3.35563	0	1.65598	1.22472	2.39466	0	1.6875
hsa-miR-548ba	7.33047	0	4.46212	0	1.09422	0.618487	0.832296	0	1.87887	3.00986	1.7499	0	0	0	5.59397	4.20426	3.00226	0	0.7738	0	0	2.00076	0	5.6837	0	2.69195	0.303397	0	0	0	4.47186	0	1.45943	0	0	4.96794	8.57305	0	0	1.6875
hsa-miR-4636	7.33047	0	0	0	0.729481	0	0	0	0.939436	3.00986	1.7499	0	2.23578	2.9091	1.39849	0	1.50113	1.57236	0	0	0.926242	2.00076	1.08271	0.56837	0.632256	2.69195	1.21359	0	1.15159	0	0	0	0	0	0	1.65598	0	0	0	0
hsa-miR-125b-1-3p	7.33047	8.08092	2.23106	2.49724	5.10637	3.09244	5.82607	1.22083	4.69718	1.50493	5.2497	18.1013	6.70735	5.81821	4.19548	0	4.50339	3.14472	6.9642	2.11257	3.24185	5.33535	6.49628	2.27348	2.52902	2.01897	2.73057	1.09659	3.45476	7.58381	6.70779	9.84106	4.3783	5.03344	4.13549	6.62392	6.12361	0	0	3.37499
hsa-miR-20a-3p	7.33047	13.4682	11.1553	7.49172	9.84799	14.2252	7.49066	4.88331	8.45492	10.5345	6.9996	18.1013	8.94313	10.1819	2.79699	21.0213	12.7596	7.86179	11.607	8.45028	9.72554	14.6722	12.9926	9.6623	3.79353	8.07586	12.7427	7.67613	16.1222	7.58381	17.8875	13.1214	5.83774	8.38907	6.20324	14.9038	8.57305	21.552	15.8426	8.43749
hsa-miR-369-5p	7.33047	12.1214	0	14.9834	1.09422	1.85546	0.832296	1.22083	1.87887	4.51479	3.4998	0	2.98104	5.81821	0	0	9.00677	3.14472	3.869	7.394	21.7667	2.66767	3.24814	1.70511	4.42579	0.672989	0.303397	14.2557	4.60635	2.52794	6.70779	0	2.91887	3.35563	8.27099	4.96794	0	2.39466	0	11.8125
hsa-miR-149-3p	7.33047	4.04046	13.3864	9.98896	0.364741	0	2.49689	1.22083	1.87887	3.00986	1.7499	9.05067	3.7263	2.9091	5.59397	12.6128	2.25169	3.14472	4.6428	0	1.38936	0.666919	4.33086	2.27348	3.16128	1.34598	0	1.09659	2.30317	12.6397	6.70779	3.28035	5.83774	0	2.06775	1.65598	6.12361	0	5.28087	0
hsa-miR-4488	7.33047	4.04046	2.23106	17.4807	2.55318	4.32941	0.832296	6.10414	1.87887	3.00986	5.2497	0	6.70735	5.81821	1.39849	0	4.50339	6.28943	0.7738	4.22514	4.16809	0.666919	3.24814	1.70511	2.52902	3.36494	2.12378	2.19318	10.3643	26.5433	6.70779	0	10.216	3.35563	6.20324	8.2799	3.67417	2.39466	2.64044	1.6875
hsa-miR-135a-2-3p	7.33047	16.1618	8.92424	32.4641	22.2492	6.80336	8.32296	10.9875	17.8493	13.5444	6.9996	0	5.96209	14.5455	2.79699	8.40852	18.7641	22.013	6.9642	7.394	36.1234	11.3376	14.0753	12.5042	12.0129	32.9764	9.40531	6.57954	27.6381	8.84778	17.8875	16.4018	16.0538	20.1338	10.3387	19.8718	7.34833	7.18399	15.8426	6.74999
hsa-miR-708-3p	7.33047	8.08092	0	0	20.4255	24.121	12.4844	6.10414	15.9704	10.5345	26.2485	9.05067	17.8863	16.0001	6.99247	4.20426	10.5079	14.1512	11.607	5.28143	11.578	6.00227	5.41357	6.25208	6.95481	11.4408	9.7087	8.77272	10.3643	17.6956	2.23593	9.84106	14.5943	16.7781	6.20324	9.93588	9.79778	7.18399	2.64044	11.8125
hsa-miR-101-5p	7.33047	2.69364	4.46212	4.99448	5.10637	4.32941	1.66459	4.88331	2.81831	3.00986	5.2497	0	2.98104	8.72731	4.19548	8.40852	2.25169	6.28943	5.4166	2.11257	3.24185	4.00151	4.33086	2.84185	2.52902	4.03793	4.55095	4.38636	8.0611	6.31984	6.70779	3.28035	2.91887	1.67781	4.13549	3.31196	1.22472	7.18399	5.28087	3.37499
hsa-miR-136-3p	7.33047	0	0	7.49172	0.364741	0.618487	0	0	2.81831	0	3.4998	0	0.745261	2.9091	0	0	4.50339	4.71708	0.7738	1.05629	18.988	2.66767	1.08271	1.70511	4.42579	0	1.51698	1.09659	1.15159	3.79191	4.47186	0	1.45943	1.67781	2.06775	4.96794	0	4.78933	0	1.6875
hsa-miR-195-3p	7.33047	13.4682	13.3864	9.98896	10.9422	9.27731	4.99377	4.88331	6.57605	4.51479	0	0	5.21683	4.36366	1.39849	4.20426	8.25621	20.4407	10.0594	7.394	27.7872	6.00227	9.74443	11.3674	23.3935	42.3983	5.76454	2.19318	8.0611	1.26397	2.23593	6.56071	4.3783	1.67781	4.13549	1.65598	4.89889	0	2.64044	3.37499
hsa-let-7f-1-3p	7.33047	5.38728	2.23106	2.49724	8.02429	3.71092	3.32918	10.9875	8.45492	3.00986	8.7495	27.152	4.47156	13.091	8.39096	8.40852	5.25395	1.57236	6.9642	2.11257	8.79929	4.00151	0	5.11533	3.79353	3.36494	7.88832	6.57954	4.60635	5.05588	4.47186	6.56071	4.3783	5.03344	4.13549	3.31196	2.44944	2.39466	2.64044	5.06249
hsa-miR-769-3p	7.33047	13.4682	15.6174	4.99448	9.11851	16.0807	24.9689	4.88331	15.9704	18.0592	10.4994	0	5.21683	5.81821	9.78945	8.40852	7.50564	6.28943	7.738	10.5629	11.1149	10.0038	10.8271	9.6623	12.0129	16.1517	12.1359	9.86931	14.9706	1.26397	0	16.4018	4.3783	8.38907	10.3387	8.2799	20.8203	7.18399	2.64044	8.43749
hsa-miR-138-2-3p	7.33047	10.7746	4.46212	7.49172	3.64741	3.09244	7.49066	4.88331	4.69718	12.0394	3.4998	9.05067	8.94313	0	1.39849	8.40852	8.25621	4.71708	3.869	7.394	3.70497	8.66994	5.41357	5.6837	3.16128	6.0569	5.76454	7.67613	5.75793	5.05588	6.70779	6.56071	7.29717	8.38907	4.13549	3.31196	4.89889	4.78933	7.92131	5.06249
hsa-miR-503-3p	7.33047	1.34682	0	0	4.74163	3.71092	2.49689	2.44166	2.81831	1.50493	3.4998	0	11.1789	2.9091	6.99247	4.20426	2.25169	3.14472	1.5476	3.16886	1.38936	0.666919	3.24814	1.13674	1.26451	2.69195	2.73057	3.28977	0	1.26397	2.23593	3.28035	2.91887	8.38907	2.06775	8.2799	6.12361	2.39466	2.64044	1.6875
hsa-miR-216a-5p	7.33047	65.9941	17.8485	24.9724	30.6382	8.04034	17.4782	13.4291	36.638	1.50493	15.7491	0	8.94313	14.5455	8.39096	12.6128	22.5169	20.4407	14.7022	27.4634	55.5745	29.3444	5.41357	3.97859	21.4967	17.4977	16.3834	12.0625	24.1833	13.9037	29.0671	0	5.83774	21.8116	10.3387	61.2713	14.6967	2.39466	10.5617	5.06249
hsa-miR-95-5p	7.33047	9.42774	13.3864	2.49724	3.28266	3.09244	2.49689	4.88331	8.45492	4.51479	10.4994	9.05067	7.45261	4.36366	22.3759	29.4298	12.009	11.0065	13.9284	9.50657	1.38936	4.66843	3.24814	3.41022	3.79353	1.34598	0.910191	4.38636	3.45476	6.31984	4.47186	22.9625	21.8915	10.0669	8.27099	8.2799	3.67417	9.57866	15.8426	16.875
hsa-miR-4510	7.33047	6.7341	6.69318	4.99448	6.20059	3.71092	7.49066	4.88331	6.57605	3.00986	5.2497	9.05067	9.68839	5.81821	4.19548	4.20426	4.50339	7.86179	5.4166	4.22514	7.40993	5.33535	10.8271	6.82045	6.95481	8.74885	6.37134	8.77272	6.90952	2.52794	4.47186	9.84106	5.83774	3.35563	6.20324	9.93588	8.57305	7.18399	7.92131	6.74999
hsa-miR-891b	7.33047	1.34682	0	0	20.0607	2.47395	1.66459	3.66249	3.75774	12.0394	5.2497	0	7.45261	8.72731	1.39849	0	6.00452	1.57236	10.8332	0	48.1646	14.0053	3.24814	3.41022	0	8.07586	56.4318	3.28977	0	7.58381	2.23593	9.84106	10.216	1.67781	0	14.9038	8.57305	7.18399	58.0896	5.06249
hsa-miR-664b-3p	7.33047	0	2.23106	2.49724	1.8237	3.71092	3.32918	4.88331	1.87887	3.00986	6.9996	9.05067	6.70735	1.45455	1.39849	8.40852	0.750564	4.71708	4.6428	3.16886	2.77872	2.00076	7.579	2.84185	1.26451	2.01897	4.85435	9.86931	6.90952	2.52794	0	3.28035	4.3783	0	6.20324	8.2799	7.34833	2.39466	2.64044	6.74999
hsa-miR-211-5p	7.33047	10.7746	13.3864	0	11.6717	14.2252	4.16148	13.4291	23.4859	10.5345	13.9992	18.1013	6.70735	16.0001	12.5864	29.4298	12.009	12.5789	14.7022	11.6191	3.70497	14.6722	22.737	7.95719	11.3806	8.74885	11.5291	13.1591	11.5159	5.05588	17.8875	13.1214	13.1349	16.7781	6.20324	3.31196	11.0225	2.39466	2.64044	11.8125
hsa-miR-6873-3p	7.33047	2.69364	0	0	2.91792	1.23697	1.66459	3.66249	4.69718	3.00986	1.7499	0	1.49052	0	0	4.20426	0.750564	3.14472	0	1.05629	0	2.66767	3.24814	1.13674	5.05805	2.69195	3.03397	2.19318	3.45476	3.79191	2.23593	0	5.83774	1.67781	0	1.65598	8.57305	4.78933	5.28087	5.06249
hsa-miR-203b-3p	7.33047	17.5087	26.7727	27.4696	12.0364	16.0807	27.4658	18.3124	18.7887	12.0394	15.7491	0	11.1789	4.36366	4.19548	8.40852	15.0113	7.86179	23.214	10.5629	15.283	19.3406	14.0753	21.0297	23.3935	14.1328	11.2257	27.4147	13.819	39.183	13.4156	3.28035	8.75661	10.0669	12.4065	13.2478	17.1461	9.57866	10.5617	13.5
hsa-miR-4443	7.33047	1.34682	8.92424	4.99448	2.55318	8.04034	5.82607	8.5458	3.75774	6.01972	6.9996	9.05067	6.70735	5.81821	5.59397	8.40852	8.25621	3.14472	1.5476	4.22514	0	1.33384	6.49628	5.11533	3.16128	4.71092	4.55095	8.77272	2.30317	3.79191	2.23593	6.56071	4.3783	3.35563	14.4742	9.93588	3.67417	0	0	6.74999
hsa-miR-548c-5p	5.49785	4.04046	2.23106	2.49724	5.10637	2.47395	3.32918	6.10414	2.81831	3.00986	3.4998	0	0.745261	4.36366	5.59397	0	5.25395	6.28943	3.869	3.16886	4.63121	4.66843	5.41357	2.84185	8.85158	6.0569	3.94416	5.48295	5.75793	5.05588	2.23593	6.56071	0	1.67781	2.06775	0	1.22472	2.39466	0	1.6875
hsa-miR-362-3p	5.49785	10.7746	2.23106	4.99448	7.65955	2.47395	7.49066	6.10414	1.87887	1.50493	3.4998	9.05067	8.94313	5.81821	5.59397	4.20426	12.009	3.14472	0.7738	3.16886	7.40993	8.00302	4.33086	5.11533	2.52902	6.72989	12.7427	6.57954	3.45476	7.58381	0	3.28035	4.3783	8.38907	10.3387	4.96794	2.44944	11.9733	10.5617	3.37499
hsa-miR-193b-3p	5.49785	4.04046	2.23106	2.49724	5.83585	6.18487	7.49066	2.44166	4.69718	9.02958	5.2497	0	2.23578	2.9091	6.99247	0	8.25621	3.14472	2.3214	3.16886	5.09433	3.33459	3.24814	5.11533	5.6903	10.7678	6.06794	3.28977	4.60635	2.52794	2.23593	6.56071	1.45943	6.71126	2.06775	1.65598	3.67417	4.78933	7.92131	10.125
hsa-miR-10401-3p	5.49785	8.08092	6.69318	4.99448	3.28266	4.32941	5.82607	6.10414	7.51549	10.5345	10.4994	9.05067	5.21683	4.36366	8.39096	50.4511	8.25621	14.1512	8.5118	3.16886	0.926242	14.6722	7.579	1.70511	4.42579	5.38391	5.46115	4.38636	4.60635	5.05588	2.23593	9.84106	10.216	11.7447	10.3387	3.31196	7.34833	4.78933	2.64044	10.125
hsa-miR-130b-5p	5.49785	2.69364	4.46212	7.49172	3.28266	1.85546	7.49066	3.66249	6.57605	3.00986	5.2497	27.152	4.47156	5.81821	4.19548	0	4.50339	4.71708	4.6428	4.22514	2.3156	4.00151	5.41357	1.70511	4.42579	6.0569	6.97813	2.19318	4.60635	5.05588	8.94373	3.28035	7.29717	6.71126	14.4742	6.62392	8.57305	2.39466	2.64044	1.6875
hsa-miR-378f	5.49785	4.04046	0	0	4.37689	4.9479	2.49689	1.22083	4.69718	0	1.7499	0	5.96209	0	2.79699	0	0.750564	0	0.7738	1.05629	3.24185	0.666919	2.16543	2.27348	2.52902	2.01897	4.24756	3.28977	3.45476	11.3757	0	6.56071	0	1.67781	4.13549	3.31196	1.22472	2.39466	5.28087	3.37499
hsa-miR-27b-5p	5.49785	0	2.23106	9.98896	6.56533	6.18487	4.16148	4.88331	5.63661	6.01972	8.7495	9.05067	2.98104	5.81821	5.59397	4.20426	4.50339	4.71708	7.738	5.28143	4.63121	3.33459	3.24814	2.27348	5.05805	3.36494	7.58492	4.38636	1.15159	6.31984	2.23593	3.28035	2.91887	5.03344	2.06775	13.2478	4.89889	4.78933	5.28087	6.74999
hsa-miR-365b-5p	5.49785	6.7341	4.46212	4.99448	1.8237	1.85546	4.99377	4.88331	4.69718	0	6.9996	0	2.98104	4.36366	1.39849	0	1.50113	7.86179	10.0594	8.45028	4.16809	4.00151	2.16543	7.95719	5.05805	4.71092	4.55095	3.28977	12.6675	2.52794	13.4156	6.56071	7.29717	3.35563	2.06775	3.31196	3.67417	0	5.28087	3.37499
hsa-miR-3144-3p	5.49785	8.08092	4.46212	0	5.83585	4.32941	5.82607	12.2083	0	13.5444	8.7495	0	4.47156	4.36366	1.39849	0	11.2585	1.57236	0	8.45028	3.70497	9.33686	4.33086	9.09393	5.6903	2.01897	6.37134	6.57954	8.0611	7.58381	4.47186	6.56071	2.91887	6.71126	4.13549	1.65598	0	9.57866	2.64044	6.74999
hsa-miR-3127-5p	5.49785	5.38728	4.46212	4.99448	2.18844	4.9479	3.32918	1.22083	4.69718	3.00986	6.9996	18.1013	2.98104	2.9091	4.19548	4.20426	6.00452	4.71708	2.3214	5.28143	1.38936	4.66843	3.24814	4.54696	3.16128	0.672989	3.03397	2.19318	1.15159	3.79191	0	3.28035	0	3.35563	8.27099	3.31196	3.67417	2.39466	2.64044	6.74999
hsa-miR-502-5p	5.49785	6.7341	0	0	7.29481	12.9882	4.16148	1.22083	3.75774	6.01972	0	0	4.47156	0	6.99247	0	3.00226	4.71708	3.0952	3.16886	6.02057	2.00076	7.579	3.41022	4.42579	5.38391	7.28153	5.48295	2.30317	8.84778	4.47186	3.28035	0	1.67781	2.06775	4.96794	4.89889	4.78933	2.64044	0
hsa-miR-450a-2-3p	5.49785	0	11.1553	4.99448	3.28266	6.18487	2.49689	3.66249	1.87887	3.00986	5.2497	0	6.70735	0	5.59397	0	2.25169	4.71708	3.869	5.28143	3.70497	4.00151	6.49628	1.13674	2.52902	1.34598	2.73057	2.19318	2.30317	6.31984	6.70779	3.28035	4.3783	1.67781	4.13549	4.96794	2.44944	4.78933	0	8.43749
hsa-miR-7-1-3p	5.49785	10.7746	8.92424	2.49724	6.56533	4.32941	4.16148	4.88331	4.69718	1.50493	6.9996	9.05067	3.7263	4.36366	4.19548	0	6.75508	6.28943	7.738	5.28143	12.5043	7.3361	6.49628	6.25208	8.85158	11.4408	9.7087	6.57954	14.9706	10.1118	4.47186	0	7.29717	6.71126	10.3387	1.65598	1.22472	9.57866	5.28087	3.37499
hsa-miR-199b-5p	5.49785	6.7341	6.69318	2.49724	5.47111	3.71092	4.16148	3.66249	4.69718	10.5345	10.4994	9.05067	12.6694	8.72731	4.19548	12.6128	5.25395	11.0065	7.738	6.33771	5.09433	2.66767	15.158	3.41022	6.95481	4.71092	12.1359	0	2.30317	18.9595	4.47186	0	1.45943	5.03344	8.27099	3.31196	7.34833	7.18399	7.92131	0
hsa-miR-1976	5.49785	4.04046	0	2.49724	3.28266	4.32941	4.16148	2.44166	3.75774	4.51479	3.4998	0	5.21683	1.45455	2.79699	4.20426	3.75282	3.14472	4.6428	2.11257	4.16809	7.3361	6.49628	5.6837	4.42579	2.69195	7.58492	4.38636	0	5.05588	6.70779	0	4.3783	3.35563	4.13549	6.62392	8.57305	2.39466	5.28087	1.6875
hsa-miR-30b-3p	5.49785	10.7746	4.46212	12.4862	19.3312	11.1328	4.16148	8.5458	10.3338	9.02958	8.7495	0	13.4147	5.81821	5.59397	16.817	11.2585	4.71708	12.3808	7.394	14.3567	14.0053	11.9099	11.9358	4.42579	14.1328	10.0121	9.86931	8.0611	6.31984	17.8875	0	8.75661	8.38907	14.4742	16.5598	12.2472	4.78933	13.2022	25.3125
hsa-miR-3960	5.49785	2.69364	4.46212	9.98896	1.8237	3.09244	3.32918	6.10414	0.939436	1.50493	5.2497	36.2027	5.21683	13.091	4.19548	0	3.00226	0	2.3214	2.11257	4.63121	1.33384	2.16543	1.70511	2.52902	1.34598	1.21359	2.19318	9.21269	6.31984	2.23593	0	1.45943	0	6.20324	6.62392	2.44944	0	2.64044	6.74999
hsa-miR-642a-5p	5.49785	13.4682	11.1553	7.49172	16.0486	4.9479	59.093	25.6374	23.4859	28.5937	17.499	18.1013	17.8863	17.4546	8.39096	21.0213	9.00677	6.28943	10.0594	23.2383	4.16809	15.3391	19.4889	10.2307	36.6708	2.69195	22.148	15.3523	11.5159	30.3353	11.1797	45.9249	14.5943	15.1003	2.06775	3.31196	7.34833	28.736	29.0448	15.1875
hsa-miR-183-3p	5.49785	1.34682	0	4.99448	1.09422	1.23697	2.49689	3.66249	2.81831	0	3.4998	0	2.23578	1.45455	0	0	0.750564	4.71708	3.0952	3.16886	2.3156	4.00151	2.16543	2.84185	3.16128	2.69195	2.12378	0	0	7.58381	0	0	0	0	0	1.65598	1.22472	0	2.64044	3.37499
hsa-miR-1277-3p	5.49785	8.08092	6.69318	17.4807	6.56533	6.80336	5.82607	10.9875	4.69718	12.0394	3.4998	9.05067	11.9242	10.1819	6.99247	21.0213	9.75734	4.71708	12.3808	6.33771	4.63121	9.33686	6.49628	3.97859	6.32256	5.38391	6.06794	7.67613	4.60635	20.2235	17.8875	13.1214	1.45943	5.03344	12.4065	13.2478	7.34833	11.9733	13.2022	5.06249
hsa-miR-514a-5p	5.49785	2.69364	2.23106	0	8.75377	6.80336	2.49689	0	10.3338	0	1.7499	9.05067	5.96209	2.9091	4.19548	4.20426	2.25169	6.28943	13.1546	0	13.4305	6.66919	1.08271	0.56837	1.89677	5.38391	1.82038	4.38636	6.90952	1.26397	4.47186	0	2.91887	5.03344	0	4.96794	1.22472	0	2.64044	1.6875
hsa-miR-6513-3p	5.49785	4.04046	6.69318	4.99448	4.01215	2.47395	5.82607	3.66249	5.63661	4.51479	3.4998	9.05067	2.23578	2.9091	6.99247	16.817	5.25395	4.71708	2.3214	2.11257	3.70497	2.00076	1.08271	4.54696	2.52902	4.03793	4.55095	5.48295	5.75793	6.31984	4.47186	3.28035	8.75661	8.38907	4.13549	4.96794	2.44944	9.57866	5.28087	6.74999
hsa-miR-1237-3p	5.49785	0	0	0	0	2.47395	1.66459	2.44166	0.939436	1.50493	1.7499	0	1.49052	0	1.39849	8.40852	2.25169	3.14472	0	1.05629	0.926242	3.33459	1.08271	0	0.632256	0.672989	1.82038	1.09659	0	8.84778	6.70779	0	1.45943	1.67781	0	3.31196	1.22472	4.78933	2.64044	0
hsa-miR-1304-3p	5.49785	5.38728	8.92424	2.49724	6.20059	8.04034	12.4844	3.66249	10.3338	4.51479	5.2497	9.05067	5.21683	7.27276	2.79699	0	6.00452	11.0065	4.6428	4.22514	6.02057	2.00076	3.24814	3.97859	7.58707	8.07586	7.88832	3.28977	9.21269	8.84778	4.47186	6.56071	10.216	3.35563	8.27099	3.31196	2.44944	2.39466	2.64044	5.06249
hsa-miR-4677-3p	5.49785	0	2.23106	2.49724	2.18844	3.71092	1.66459	0	0	4.51479	5.2497	0	2.98104	1.45455	1.39849	0	2.25169	1.57236	6.9642	3.16886	4.16809	4.00151	3.24814	3.97859	1.26451	3.36494	6.06794	2.19318	4.60635	6.31984	0	0	1.45943	0	2.06775	4.96794	1.22472	4.78933	0	3.37499
hsa-miR-6505-3p	5.49785	2.69364	0	0	1.45896	1.85546	2.49689	1.22083	0	0	0	0	0.745261	1.45455	1.39849	4.20426	3.00226	0	0.7738	1.05629	1.38936	1.33384	0	0.56837	0	1.34598	0.303397	1.09659	0	0	0	0	0	0	0	1.65598	1.22472	0	0	0
hsa-miR-3605-5p	5.49785	0	2.23106	0	0.729481	2.47395	2.49689	1.22083	1.87887	0	1.7499	0	2.23578	1.45455	0	0	3.00226	1.57236	0.7738	1.05629	1.85248	0.666919	2.16543	0.56837	2.52902	1.34598	1.51698	1.09659	1.15159	2.52794	0	3.28035	2.91887	0	0	3.31196	1.22472	2.39466	0	0
hsa-miR-219a-5p	5.49785	4.04046	2.23106	9.98896	4.37689	2.47395	1.66459	0	4.69718	3.00986	1.7499	0	4.47156	1.45455	6.99247	0	2.25169	7.86179	1.5476	3.16886	3.70497	6.00227	1.08271	3.97859	0	8.74885	6.67473	6.57954	4.60635	5.05588	2.23593	0	1.45943	1.67781	0	1.65598	1.22472	2.39466	0	3.37499
hsa-miR-3173-5p	5.49785	4.04046	6.69318	0	2.55318	6.18487	4.99377	4.88331	4.69718	7.52465	6.9996	0	5.21683	4.36366	1.39849	0	3.75282	4.71708	6.1904	6.33771	4.16809	4.66843	4.33086	2.27348	5.05805	2.01897	3.64076	2.19318	3.45476	5.05588	0	6.56071	1.45943	6.71126	12.4065	8.2799	8.57305	7.18399	5.28087	6.74999
hsa-miR-139-3p	5.49785	0	0	2.49724	6.56533	0	4.16148	3.66249	2.81831	0	0	0	5.96209	5.81821	0	4.20426	4.50339	0	0.7738	1.05629	0	1.33384	2.16543	3.97859	0	1.34598	4.24756	1.09659	0	0	0	0	0	0	0	0	1.22472	2.39466	5.28087	6.74999
hsa-miR-122-5p	5.49785	2.69364	26.7727	7.49172	6.20059	8.65882	8.32296	1.22083	8.45492	3.00986	10.4994	0	2.98104	4.36366	4.19548	16.817	8.25621	7.86179	6.1904	7.394	2.77872	2.66767	4.33086	12.5042	10.7483	3.36494	5.46115	3.28977	3.45476	17.6956	2.23593	9.84106	8.75661	5.03344	6.20324	6.62392	2.44944	35.92	13.2022	1.6875
hsa-miR-1290	5.49785	12.1214	8.92424	17.4807	8.75377	5.56639	8.32296	4.88331	7.51549	1.50493	0	0	19.3768	5.81821	0	12.6128	1.50113	12.5789	4.6428	6.33771	8.79929	2.00076	4.33086	1.13674	3.79353	7.40288	2.42718	7.67613	6.90952	66.9903	4.47186	0	11.6755	3.35563	8.27099	19.8718	12.2472	2.39466	10.5617	5.06249
hsa-miR-134-5p	5.49785	4.04046	0	4.99448	1.8237	3.71092	0	1.22083	7.51549	3.00986	5.2497	0	0	2.9091	0	0	6.75508	4.71708	4.6428	7.394	31.4922	1.33384	3.24814	2.27348	8.85158	0.672989	0.606794	5.48295	3.45476	1.26397	8.94373	0	1.45943	1.67781	4.13549	6.62392	2.44944	2.39466	0	15.1875
hsa-miR-889-3p	5.49785	1.34682	0	14.9834	0.364741	3.09244	0.832296	2.44166	4.69718	1.50493	0	9.05067	1.49052	2.9091	1.39849	0	3.00226	0	0	1.05629	9.26242	1.33384	1.08271	1.13674	0.632256	0	0	4.38636	2.30317	2.52794	2.23593	3.28035	1.45943	1.67781	0	3.31196	0	0	0	8.43749
hsa-miR-137-3p	5.49785	0	0	0	0	0	0	0	0	0	0	0	0	1.45455	0	0	1.50113	0	0.7738	0	0.463121	1.33384	0	0	0	0	0.303397	0	0	3.79191	0	0	0	0	0	0	1.22472	0	0	0
hsa-miR-548e-3p	3.66523	5.38728	2.23106	2.49724	1.09422	3.71092	2.49689	0	1.87887	0	5.2497	9.05067	0	4.36366	0	0	3.75282	0	3.0952	5.28143	1.85248	0.666919	2.16543	1.13674	2.52902	5.38391	3.64076	0	2.30317	5.05588	4.47186	6.56071	2.91887	6.71126	2.06775	1.65598	0	0	5.28087	3.37499
hsa-miR-548b-5p	3.66523	2.69364	0	0	1.09422	0.618487	0.832296	0	0	0	0	18.1013	0.745261	2.9091	1.39849	4.20426	2.25169	0	2.3214	0	0.926242	0	3.24814	1.13674	0	1.34598	1.21359	1.09659	0	0	2.23593	0	0	3.35563	2.06775	3.31196	1.22472	0	0	0
hsa-miR-451a	3.66523	1.34682	15.6174	0	3.64741	3.09244	14.149	0	34.7591	1.50493	1.7499	9.05067	8.19787	1.45455	0	0	1.50113	0	0	25.3508	1.38936	1.33384	7.579	0	1.89677	0	29.4295	0	5.75793	2.52794	11.1797	0	0	0	0	0	6.12361	0	0	23.625
hsa-miR-1277-5p	3.66523	0	2.23106	4.99448	0.364741	1.85546	1.66459	6.10414	4.69718	1.50493	0	18.1013	2.98104	8.72731	8.39096	12.6128	5.25395	1.57236	2.3214	3.16886	0.926242	4.00151	4.33086	2.27348	0.632256	2.01897	2.12378	4.38636	3.45476	3.79191	0	0	2.91887	1.67781	4.13549	4.96794	4.89889	11.9733	0	1.6875
hsa-miR-487b-3p	3.66523	4.04046	2.23106	12.4862	0.729481	0.618487	1.66459	1.22083	0	9.02958	0	0	2.23578	8.72731	0	0	6.00452	1.57236	0.7738	3.16886	17.5986	0.666919	1.08271	1.70511	6.95481	2.01897	0.910191	1.09659	2.30317	3.79191	4.47186	0	2.91887	1.67781	2.06775	3.31196	1.22472	2.39466	0	6.74999
hsa-miR-642a-3p	3.66523	1.34682	2.23106	0	5.10637	0.618487	14.149	4.88331	4.69718	7.52465	1.7499	0	4.47156	4.36366	1.39849	4.20426	1.50113	3.14472	1.5476	3.16886	1.38936	3.33459	10.8271	1.70511	6.95481	4.71092	4.85435	2.19318	1.15159	6.31984	4.47186	6.56071	1.45943	6.71126	0	3.31196	2.44944	7.18399	2.64044	5.06249
hsa-miR-210-5p	3.66523	1.34682	0	0	1.45896	1.23697	4.16148	2.44166	1.87887	1.50493	3.4998	0	5.21683	2.9091	1.39849	0	1.50113	3.14472	3.0952	1.05629	0.926242	2.00076	2.16543	2.84185	3.16128	2.69195	1.51698	0	2.30317	1.26397	2.23593	0	0	3.35563	0	3.31196	3.67417	0	2.64044	0
hsa-miR-2277-5p	3.66523	0	0	0	1.09422	0	0	0	0	1.50493	0	0	0.745261	0	0	0	0	0	0	3.16886	0.926242	1.33384	1.08271	0.56837	0	2.01897	0.303397	0	0	1.26397	0	0	0	0	0	1.65598	1.22472	0	0	5.06249
hsa-miR-365a-5p	3.66523	5.38728	4.46212	7.49172	2.91792	0.618487	6.65836	4.88331	10.3338	3.00986	3.4998	0	4.47156	5.81821	5.59397	0	2.25169	4.71708	2.3214	3.16886	1.85248	4.66843	4.33086	2.84185	2.52902	2.69195	4.24756	3.28977	9.21269	5.05588	0	3.28035	4.3783	0	10.3387	4.96794	4.89889	7.18399	7.92131	1.6875
hsa-miR-185-3p	3.66523	8.08092	8.92424	0	7.65955	3.71092	6.65836	9.76663	7.51549	3.00986	10.4994	0	5.96209	2.9091	2.79699	4.20426	3.00226	1.57236	4.6428	6.33771	3.70497	4.00151	4.33086	5.11533	5.05805	0.672989	4.85435	5.48295	6.90952	7.58381	6.70779	0	5.83774	5.03344	8.27099	4.96794	4.89889	7.18399	2.64044	3.37499
hsa-miR-323a-5p	3.66523	0	0	0	0	0	0	0	0	0	0	0	0	0	0	0	0	0	0	0	0	0	0	0	0	0	0	0	0	0	0	0	0	0	0	0	0	0	0	0
hsa-miR-466	3.66523	0	0	0	0	0	0	0	0	0	0	0	0.745261	0	0	0	0	0	0	0	0	1.33384	0	0	0	0	0.303397	0	0	0	0	0	0	0	0	0	0	0	0	0
hsa-miR-556-3p	3.66523	1.34682	0	2.49724	1.09422	3.09244	1.66459	1.22083	1.87887	3.00986	3.4998	0	1.49052	2.9091	2.79699	0	2.25169	6.28943	0	6.33771	2.3156	1.33384	2.16543	2.84185	1.89677	0.672989	1.51698	0	2.30317	0	4.47186	3.28035	0	5.03344	2.06775	0	0	0	0	0
hsa-miR-561-5p	3.66523	1.34682	0	4.99448	2.91792	3.09244	3.32918	4.88331	2.81831	1.50493	1.7499	9.05067	2.23578	5.81821	0	0	3.00226	4.71708	3.0952	3.16886	3.24185	3.33459	1.08271	2.27348	2.52902	7.40288	2.42718	2.19318	1.15159	0	2.23593	13.1214	7.29717	1.67781	0	1.65598	4.89889	2.39466	5.28087	8.43749
hsa-miR-539-3p	3.66523	0	0	0	0.364741	0	0.832296	0	0.939436	0	0	0	0	0	0	0	0.750564	0	0	0	2.3156	0	0	0	1.26451	0	0.303397	0	0	0	0	3.28035	0	0	0	0	0	0	0	3.37499
hsa-miR-6888-3p	3.66523	0	0	0	0	0.618487	0	0	0	0	0	0	0	0	0	0	0	0	0	0	0	0	0	0	0	0	0.303397	0	1.15159	0	0	0	0	0	0	0	0	0	0	0
hsa-miR-135b-3p	3.66523	4.04046	0	0	1.8237	1.85546	4.16148	1.22083	2.81831	1.50493	1.7499	0	1.49052	2.9091	1.39849	0	2.25169	1.57236	2.3214	3.16886	2.3156	0.666919	1.08271	3.41022	6.95481	2.01897	1.21359	3.28977	1.15159	3.79191	4.47186	6.56071	1.45943	0	2.06775	0	2.44944	2.39466	2.64044	0
hsa-miR-548h-3p	3.66523	6.7341	4.46212	4.99448	6.20059	6.80336	6.65836	7.32497	8.45492	3.00986	5.2497	9.05067	9.68839	4.36366	13.9849	4.20426	8.25621	11.0065	3.0952	4.22514	3.70497	8.66994	8.66171	6.25208	11.3806	5.38391	5.76454	7.67613	6.90952	2.52794	4.47186	3.28035	8.75661	5.03344	6.20324	9.93588	0	16.7627	0	8.43749
hsa-miR-548a-3p	3.66523	8.08092	2.23106	7.49172	4.74163	6.18487	5.82607	6.10414	5.63661	0	0	0	2.98104	2.9091	0	0	9.75734	6.28943	4.6428	2.11257	3.70497	2.00076	3.24814	2.27348	3.79353	0.672989	3.94416	1.09659	2.30317	3.79191	17.8875	0	1.45943	5.03344	6.20324	1.65598	6.12361	0	5.28087	5.06249
hsa-miR-548b-3p	3.66523	1.34682	6.69318	0	5.83585	1.23697	0.832296	0	0	3.00986	3.4998	0	2.23578	1.45455	1.39849	0	0	0	3.0952	0	2.3156	2.66767	5.41357	3.41022	1.26451	2.01897	1.51698	3.28977	2.30317	2.52794	0	0	0	3.35563	2.06775	4.96794	0	2.39466	0	1.6875
hsa-miR-100-3p	3.66523	9.42774	8.92424	9.98896	6.56533	4.9479	3.32918	0	2.81831	3.00986	5.2497	18.1013	7.45261	10.1819	2.79699	0	5.25395	3.14472	5.4166	2.11257	5.09433	4.00151	5.41357	1.70511	2.52902	6.0569	4.24756	2.19318	1.15159	1.26397	6.70779	3.28035	4.3783	3.35563	10.3387	6.62392	2.44944	4.78933	5.28087	6.74999
hsa-miR-34a-3p	3.66523	2.69364	0	2.49724	3.64741	4.9479	4.16148	2.44166	0.939436	4.51479	0	0	2.98104	0	2.79699	0	2.25169	1.57236	2.3214	4.22514	6.02057	3.33459	2.16543	2.27348	5.05805	0.672989	2.42718	3.28977	0	6.31984	2.23593	3.28035	0	0	6.20324	1.65598	1.22472	0	0	1.6875
hsa-miR-323a-3p	3.66523	1.34682	0	2.49724	0	0.618487	1.66459	1.22083	5.63661	3.00986	0	0	1.49052	0	0	0	7.50564	1.57236	2.3214	3.16886	19.4511	0.666919	3.24814	2.27348	5.6903	0	1.51698	1.09659	0	0	4.47186	0	4.3783	5.03344	0	3.31196	0	0	0	8.43749
hsa-miR-892b	3.66523	0	2.23106	2.49724	10.2127	3.09244	0.832296	4.88331	3.75774	6.01972	12.2493	0	8.94313	1.45455	4.19548	4.20426	4.50339	0	3.869	0	33.8078	10.0038	0	5.6837	0.632256	3.36494	37.6212	1.09659	1.15159	3.79191	0	0	10.216	3.35563	14.4742	3.31196	8.57305	9.57866	39.6065	10.125
hsa-miR-3940-3p	3.66523	0	0	0	0.729481	6.18487	2.49689	1.22083	0.939436	0	0	0	1.49052	0	0	0	0.750564	1.57236	1.5476	1.05629	0	2.00076	1.08271	0.56837	1.26451	0	0.303397	3.28977	0	0	0	0	0	0	0	1.65598	0	0	0	1.6875
hsa-miR-199a-5p	3.66523	0	2.23106	0	2.55318	1.23697	1.66459	1.22083	0	0	0	0	2.23578	2.9091	2.79699	0	3.00226	0	0.7738	2.11257	1.38936	1.33384	0	0.56837	0	0.672989	1.21359	1.09659	0	1.26397	2.23593	0	1.45943	1.67781	0	0	3.67417	2.39466	2.64044	0
hsa-miR-570-3p	3.66523	1.34682	4.46212	2.49724	9.48325	5.56639	3.32918	4.88331	0.939436	3.00986	0	9.05067	1.49052	1.45455	0	4.20426	4.50339	1.57236	0.7738	3.16886	2.77872	1.33384	2.16543	4.54696	4.42579	7.40288	3.33737	3.28977	2.30317	2.52794	0	3.28035	2.91887	0	0	3.31196	6.12361	2.39466	10.5617	10.125
hsa-miR-331-5p	3.66523	0	2.23106	2.49724	1.8237	0.618487	1.66459	1.22083	1.87887	3.00986	1.7499	0	0.745261	1.45455	0	4.20426	0	0	1.5476	2.11257	1.38936	2.00076	0	2.84185	1.89677	0	3.03397	0	2.30317	1.26397	2.23593	3.28035	4.3783	3.35563	0	1.65598	1.22472	0	0	1.6875
hsa-miR-4750-5p	3.66523	2.69364	0	0	0.729481	0	0.832296	0	3.75774	1.50493	5.2497	0	2.23578	0	1.39849	0	0	0	0.7738	4.22514	0.463121	0.666919	1.08271	1.70511	0.632256	0.672989	0.606794	3.28977	5.75793	0	4.47186	0	1.45943	1.67781	2.06775	0	0	0	0	5.06249
hsa-miR-519c-5p	3.66523	1.34682	0	0	0.364741	0	0	2.44166	1.87887	0	0	0	1.49052	0	0	4.20426	1.50113	0	2.3214	1.05629	0	0	1.08271	0	1.26451	0.672989	0.910191	0	1.15159	0	2.23593	0	0	0	2.06775	0	0	0	0	0
hsa-miR-744-3p	3.66523	0	0	0	0.364741	0	0	0	0.939436	0	1.7499	0	0	0	1.39849	0	0	0	2.3214	0	0.463121	0.666919	0	0	0.632256	0	0.910191	0	2.30317	0	0	0	2.91887	1.67781	0	0	1.22472	2.39466	0	0
hsa-miR-6750-3p	3.66523	0	4.46212	0	0.364741	0	0	0	0.939436	0	0	0	0	0	1.39849	0	0	0	0	2.11257	0.463121	0.666919	1.08271	0.56837	1.26451	0.672989	0.303397	2.19318	0	0	0	0	0	0	0	0	0	4.78933	0	0
hsa-miR-296-3p	3.66523	8.08092	8.92424	9.98896	13.1307	11.1328	14.9813	20.7541	25.3648	13.5444	12.2493	54.304	18.6315	11.6364	22.3759	8.40852	12.7596	23.5854	9.2856	14.788	12.9674	10.0038	12.9926	12.5042	14.5419	16.1517	9.10191	13.1591	17.2738	2.52794	15.6515	16.4018	7.29717	5.03344	24.813	14.9038	15.9214	7.18399	18.483	18.5625
hsa-miR-205-3p	3.66523	0	0	0	1.45896	3.71092	4.16148	1.22083	0.939436	3.00986	0	0	0	0	0	0	0.750564	0	0.7738	2.11257	0.926242	2.66767	2.16543	0.56837	0	2.01897	3.33737	2.19318	5.75793	5.05588	6.70779	3.28035	1.45943	1.67781	6.20324	0	1.22472	0	0	5.06249
hsa-miR-330-3p	3.66523	1.34682	6.69318	2.49724	2.55318	1.85546	5.82607	7.32497	3.75774	9.02958	5.2497	9.05067	12.6694	0	5.59397	16.817	4.50339	1.57236	4.6428	4.22514	4.16809	5.33535	5.41357	6.25208	5.6903	3.36494	6.06794	9.86931	3.45476	6.31984	2.23593	6.56071	0	0	6.20324	4.96794	7.34833	11.9733	13.2022	3.37499
hsa-miR-873-5p	3.66523	4.04046	2.23106	0	1.8237	3.09244	2.49689	3.66249	2.81831	6.01972	3.4998	9.05067	0.745261	2.9091	2.79699	4.20426	4.50339	1.57236	0.7738	2.11257	3.70497	4.00151	1.08271	3.97859	1.89677	2.69195	3.64076	5.48295	0	1.26397	0	0	0	6.71126	0	6.62392	0	2.39466	0	0
hsa-miR-29b-1-5p	3.66523	12.1214	4.46212	7.49172	8.02429	4.32941	8.32296	3.66249	3.75774	3.00986	6.9996	27.152	3.7263	4.36366	2.79699	0	3.00226	3.14472	10.8332	3.16886	5.09433	5.33535	1.08271	5.11533	3.79353	3.36494	4.55095	7.67613	0	3.79191	4.47186	3.28035	4.3783	3.35563	4.13549	4.96794	6.12361	4.78933	5.28087	6.74999
hsa-miR-3928-3p	3.66523	2.69364	4.46212	0	3.28266	3.09244	5.82607	3.66249	0.939436	6.01972	0	0	6.70735	7.27276	1.39849	0	3.00226	3.14472	3.0952	6.33771	3.24185	0.666919	3.24814	5.6837	8.21932	4.71092	3.64076	6.57954	2.30317	6.31984	6.70779	0	2.91887	1.67781	0	3.31196	0	2.39466	2.64044	3.37499
hsa-miR-877-5p	3.66523	6.7341	6.69318	7.49172	5.10637	1.85546	5.82607	4.88331	7.51549	3.00986	5.2497	18.1013	7.45261	7.27276	2.79699	0	6.75508	6.28943	3.0952	6.33771	6.48369	6.00227	3.24814	9.6623	8.21932	1.34598	6.67473	6.57954	4.60635	6.31984	2.23593	6.56071	7.29717	3.35563	6.20324	3.31196	7.34833	4.78933	0	8.43749
hsa-miR-485-3p	3.66523	4.04046	2.23106	12.4862	0.729481	2.47395	2.49689	1.22083	10.3338	9.02958	10.4994	9.05067	0.745261	21.8183	0	4.20426	17.263	4.71708	1.5476	8.45028	15.7461	2.00076	7.579	3.97859	12.0129	0.672989	1.21359	5.48295	6.90952	8.84778	20.1234	0	14.5943	8.38907	6.20324	13.2478	0	4.78933	0	32.0624
hsa-miR-627-5p	3.66523	1.34682	2.23106	7.49172	2.91792	1.85546	4.99377	2.44166	0.939436	1.50493	0	9.05067	3.7263	0	0	4.20426	3.00226	3.14472	3.0952	3.16886	6.02057	1.33384	1.08271	1.70511	3.79353	4.03793	3.33737	3.28977	2.30317	5.05588	2.23593	9.84106	1.45943	1.67781	4.13549	1.65598	0	4.78933	2.64044	0
hsa-miR-217-5p	3.66523	5.38728	2.23106	0	3.28266	1.23697	2.49689	2.44166	9.39436	0	1.7499	0	1.49052	0	0	0	2.25169	1.57236	1.5476	2.11257	9.26242	2.66767	1.08271	0	1.89677	2.01897	3.33737	1.09659	5.75793	0	4.47186	0	0	1.67781	0	9.93588	2.44944	2.39466	2.64044	1.6875
hsa-miR-3943	3.66523	1.34682	0	2.49724	0	0.618487	0	1.22083	0	0	0	9.05067	0	1.45455	8.39096	0	1.50113	6.28943	3.869	0	6.48369	1.33384	0	1.13674	5.05805	10.0948	1.51698	0	3.45476	0	0	6.56071	0	5.03344	0	1.65598	1.22472	0	0	1.6875
hsa-miR-449c-5p	3.66523	2.69364	0	4.99448	2.18844	3.71092	5.82607	4.88331	3.75774	4.51479	5.2497	9.05067	4.47156	2.9091	8.39096	4.20426	0.750564	3.14472	0.7738	3.16886	3.70497	1.33384	1.08271	5.6837	7.58707	2.69195	0.606794	6.57954	1.15159	0	2.23593	13.1214	4.3783	8.38907	4.13549	0	1.22472	4.78933	0	3.37499
hsa-miR-34b-5p	3.66523	2.69364	0	0	0.364741	0.618487	0.832296	2.44166	0	0	0	0	0	0	1.39849	0	0	3.14472	0	0	1.38936	0.666919	1.08271	0	0	2.01897	5.76454	0	0	3.79191	8.94373	0	1.45943	0	0	0	0	0	0	0
hsa-miR-483-3p	3.66523	0	0	0	0.364741	0.618487	0	0	1.87887	0	1.7499	0	2.23578	0	6.99247	0	0.750564	0	0	0	0	0	1.08271	0	2.52902	0	0.303397	0	1.15159	0	0	0	0	0	0	0	0	0	0	0
hsa-miR-7113-5p	3.66523	1.34682	0	0	1.09422	0	0	0	0.939436	0	0	0	0	0	0	0	1.50113	0	1.5476	0	0.463121	0.666919	0	0	0	0	0	0	1.15159	0	0	0	0	0	2.06775	0	0	0	0	0
hsa-miR-885-5p	3.66523	0	0	2.49724	2.18844	1.23697	6.65836	0	0.939436	0	0	0	1.49052	0	0	0	0	0	0	1.05629	2.77872	0	1.08271	0	0	1.34598	1.51698	1.09659	0	0	0	0	0	0	4.13549	0	0	2.39466	0	0
hsa-miR-340-3p	3.66523	5.38728	6.69318	12.4862	6.20059	5.56639	7.49066	7.32497	4.69718	3.00986	6.9996	27.152	7.45261	8.72731	6.99247	4.20426	6.00452	1.57236	9.2856	5.28143	6.02057	10.6707	7.579	11.3674	5.05805	6.72989	6.67473	9.86931	5.75793	11.3757	2.23593	3.28035	4.3783	5.03344	10.3387	4.96794	1.22472	7.18399	5.28087	0
hsa-miR-196b-3p	3.66523	1.34682	4.46212	2.49724	2.55318	0	0	1.22083	1.87887	0	0	0	1.49052	1.45455	2.79699	0	0.750564	0	0	0	1.85248	1.33384	0	1.13674	0	0.672989	1.82038	1.09659	2.30317	2.52794	0	3.28035	2.91887	0	0	1.65598	1.22472	2.39466	2.64044	0
hsa-miR-3131	3.66523	1.34682	2.23106	2.49724	1.09422	4.32941	0	0	0.939436	0	1.7499	18.1013	0	0	0	4.20426	0	0	1.5476	0	1.85248	3.33459	1.08271	1.70511	1.89677	3.36494	1.82038	0	0	3.79191	0	0	0	1.67781	0	0	2.44944	2.39466	0	1.6875
hsa-miR-101-2-5p	3.66523	0	0	0	0.729481	0	0.832296	0	0.939436	1.50493	0	0	0.745261	0	0	0	0.750564	0	1.5476	0	0.926242	0	0	0	0.632256	0	0.606794	0	0	0	0	0	1.45943	1.67781	0	0	1.22472	0	0	0
hsa-miR-6784-3p	3.66523	1.34682	2.23106	2.49724	0	0.618487	1.66459	4.88331	0	3.00986	1.7499	0	1.49052	1.45455	2.79699	4.20426	0	1.57236	0.7738	1.05629	0	0	4.33086	0	0	0	0.606794	3.28977	1.15159	1.26397	2.23593	3.28035	1.45943	0	0	1.65598	0	0	0	3.37499
hsa-miR-6786-3p	3.66523	1.34682	2.23106	2.49724	0.729481	2.47395	1.66459	0	0.939436	1.50493	1.7499	0	1.49052	1.45455	4.19548	0	2.25169	0	0.7738	0	0.926242	0.666919	0	2.27348	0.632256	0.672989	0	0	2.30317	0	2.23593	0	1.45943	3.35563	2.06775	1.65598	4.89889	0	5.28087	1.6875
hsa-miR-767-5p	3.66523	1.34682	0	0	1.8237	3.09244	4.16148	2.44166	3.75774	0	3.4998	0	2.98104	1.45455	13.9849	0	0.750564	1.57236	4.6428	7.394	0.463121	4.00151	0	0	3.16128	0.672989	1.82038	3.28977	6.90952	1.26397	0	0	4.3783	1.67781	0	0	6.12361	0	0	0
hsa-miR-6762-3p	3.66523	0	0	0	0.729481	1.23697	0.832296	0	0.939436	1.50493	1.7499	0	0	1.45455	1.39849	0	0	0	0	0	0.463121	0.666919	0	0	0.632256	0	0.606794	1.09659	0	0	0	0	1.45943	0	2.06775	0	0	0	0	0
hsa-miR-5187-5p	3.66523	4.04046	2.23106	4.99448	5.83585	1.85546	2.49689	1.22083	5.63661	4.51479	5.2497	0	8.94313	1.45455	5.59397	12.6128	7.50564	3.14472	3.869	10.5629	2.77872	4.66843	3.24814	3.97859	5.05805	5.38391	4.85435	3.28977	2.30317	6.31984	0	3.28035	5.83774	5.03344	4.13549	3.31196	3.67417	7.18399	2.64044	6.74999
hsa-miR-6848-5p	3.66523	0	0	0	0.364741	0	0	0	0	1.50493	0	0	0.745261	0	0	0	0	0	0	0	0	0	0	0	0	0	0	0	0	0	0	0	0	0	0	0	0	0	0	0
hsa-miR-4775	3.66523	0	2.23106	0	1.8237	0.618487	0.832296	0	1.87887	0	3.4998	9.05067	0.745261	1.45455	1.39849	0	0.750564	3.14472	0	0	2.3156	0	3.24814	1.13674	1.89677	0	0.910191	2.19318	0	1.26397	4.47186	0	1.45943	0	0	0	0	2.39466	0	1.6875
hsa-miR-9985	3.66523	6.7341	15.6174	12.4862	21.5197	17.3176	5.82607	7.32497	11.2732	10.5345	13.9992	9.05067	10.4337	21.8183	15.3834	8.40852	9.00677	7.86179	13.1546	12.6754	10.1887	12.6715	14.0753	16.4827	13.9096	6.0569	9.7087	4.38636	8.0611	36.6551	8.94373	9.84106	7.29717	10.0669	12.4065	11.5919	14.6967	9.57866	21.1235	10.125
hsa-miR-1299	3.66523	63.3005	104.86	74.9172	1.45896	53.1899	31.6272	35.404	2.81831	66.2169	85.7451	81.456	4.47156	2.9091	88.1051	29.4298	1.50113	9.43415	2.3214	98.2345	76.878	46.6843	54.1357	28.9869	109.38	227.47	254.247	99.7896	196.921	34.1272	98.381	39.3642	52.5396	67.1126	2.06775	43.0555	62.4608	93.3919	108.258	114.75
hsa-miR-6734-5p	3.66523	4.04046	2.23106	2.49724	2.18844	3.09244	3.32918	2.44166	2.81831	6.01972	6.9996	0	1.49052	5.81821	6.99247	0	1.50113	1.57236	0.7738	3.16886	4.16809	2.00076	7.579	1.13674	3.16128	2.01897	1.82038	1.09659	2.30317	1.26397	4.47186	3.28035	5.83774	1.67781	2.06775	0	6.12361	2.39466	2.64044	3.37499
hsa-miR-153-3p	3.66523	8.08092	2.23106	4.99448	0	0.618487	0	3.66249	0.939436	3.00986	3.4998	18.1013	0.745261	0	4.19548	0	1.50113	3.14472	3.0952	1.05629	2.77872	3.33459	2.16543	3.41022	1.89677	3.36494	1.21359	1.09659	4.60635	1.26397	6.70779	0	8.75661	3.35563	4.13549	0	1.22472	2.39466	7.92131	8.43749
hsa-miR-3611	3.66523	1.34682	0	0	0.729481	0.618487	0	1.22083	0.939436	3.00986	1.7499	0	1.49052	4.36366	1.39849	0	3.00226	3.14472	0	2.11257	0	1.33384	0	0.56837	1.89677	1.34598	2.42718	0	5.75793	7.58381	0	3.28035	1.45943	5.03344	0	1.65598	1.22472	0	0	3.37499
hsa-miR-122b-5p	3.66523	1.34682	2.23106	0	6.20059	0.618487	0.832296	3.66249	1.87887	0	0	0	2.23578	5.81821	2.79699	0	4.50339	3.14472	5.4166	0	2.77872	2.66767	5.41357	1.70511	2.52902	2.69195	3.33737	1.09659	3.45476	2.52794	2.23593	0	0	1.67781	0	0	1.22472	0	2.64044	0
hsa-miR-507	3.66523	0	0	0	0.364741	0.618487	0	0	0.939436	0	0	0	0.745261	1.45455	0	4.20426	0.750564	0	0.7738	0	0.926242	0	0	0	0.632256	0	0.303397	0	0	0	0	0	0	0	0	0	3.67417	0	0	0
hsa-miR-1537-3p	1.83262	0	0	0	0	0	0	0	0	0	0	0	0	0	0	0	0	0	1.5476	0	0.463121	0	0	0	0	0	0	0	0	0	0	0	0	0	0	0	1.22472	0	0	1.6875
hsa-miR-548ak	1.83262	2.69364	4.46212	2.49724	0.729481	1.85546	0.832296	0	1.87887	0	0	0	2.23578	2.9091	1.39849	4.20426	0	3.14472	1.5476	1.05629	0.463121	1.33384	3.24814	1.13674	3.16128	0.672989	0.910191	1.09659	1.15159	1.26397	4.47186	3.28035	0	1.67781	0	0	1.22472	2.39466	2.64044	0
hsa-miR-548i	1.83262	0	2.23106	0	0.364741	0.618487	2.49689	0	0	0	0	0	0.745261	0	2.79699	4.20426	1.50113	0	2.3214	1.05629	0.463121	0	2.16543	0	0	2.01897	1.21359	1.09659	1.15159	1.26397	0	0	1.45943	3.35563	2.06775	3.31196	0	0	0	1.6875
hsa-miR-548ap-5p	1.83262	0	0	0	0.364741	0	0	1.22083	0	1.50493	0	0	0	2.9091	0	0	0	0	0	0	0.463121	0	1.08271	0	0.632256	0	0	0	0	0	0	6.56071	0	1.67781	0	0	0	0	0	1.6875
hsa-miR-548au-5p	1.83262	2.69364	0	0	1.8237	1.85546	4.16148	3.66249	0.939436	1.50493	3.4998	9.05067	2.23578	2.9091	0	4.20426	1.50113	3.14472	2.3214	0	1.85248	0.666919	4.33086	0.56837	2.52902	0.672989	1.21359	1.09659	1.15159	0	0	0	0	5.03344	0	3.31196	0	2.39466	2.64044	0
hsa-miR-548ay-5p	1.83262	4.04046	2.23106	0	1.8237	0.618487	0	0	0	0	0	0	0.745261	0	0	0	0	0	1.5476	2.11257	0.926242	0	1.08271	0	0	0.672989	1.21359	1.09659	0	1.26397	2.23593	3.28035	0	0	0	1.65598	2.44944	0	0	0
hsa-miR-548d-5p	1.83262	2.69364	0	0	0.364741	1.23697	0	0	0	0	3.4998	0	1.49052	0	2.79699	4.20426	0.750564	0	0.7738	0	0.463121	0.666919	0	0	0.632256	0.672989	0.910191	1.09659	0	1.26397	2.23593	3.28035	0	0	0	1.65598	2.44944	2.39466	0	3.37499
hsa-miR-106a-5p	1.83262	5.38728	2.23106	2.49724	2.55318	8.04034	1.66459	2.44166	0.939436	4.51479	1.7499	0	6.70735	4.36366	2.79699	0	4.50339	15.7236	5.4166	5.28143	4.63121	3.33459	1.08271	2.84185	2.52902	4.03793	3.03397	3.28977	3.45476	3.79191	4.47186	6.56071	2.91887	8.38907	4.13549	1.65598	2.44944	2.39466	2.64044	3.37499
hsa-miR-641	1.83262	0	2.23106	2.49724	3.64741	3.09244	5.82607	3.66249	4.69718	0	8.7495	0	2.23578	0	2.79699	12.6128	3.00226	0	4.6428	4.22514	2.77872	2.00076	3.24814	5.11533	5.05805	6.0569	2.73057	4.38636	1.15159	3.79191	6.70779	3.28035	2.91887	0	2.06775	0	3.67417	4.78933	5.28087	3.37499
hsa-miR-320e	1.83262	1.34682	2.23106	2.49724	3.28266	1.23697	2.49689	1.22083	1.87887	1.50493	0	9.05067	4.47156	0	0	0	1.50113	4.71708	4.6428	0	1.85248	1.33384	3.24814	2.27348	0.632256	2.69195	1.51698	0	2.30317	1.26397	0	6.56071	0	0	6.20324	1.65598	0	2.39466	2.64044	0
hsa-miR-519a-3p	1.83262	0	0	0	0	0	0	0	0	0	0	0	1.49052	0	0	0	0	0	0	0	0	0	0	0	0	0	0	0	0	0	0	0	0	0	0	0	0	0	0	0
hsa-miR-513b-3p	1.83262	0	0	0	0.364741	0	0	0	0	0	0	0	0	0	0	0	0	0	0	0	0	0	0	0.56837	0	0	0	0	0	0	0	0	0	0	0	0	0	0	0	0
hsa-miR-552-3p	1.83262	0	0	0	0	0	0	1.22083	0	0	0	0	0	0	0	0	0	0	0	0	0	0	0	0	0	0	0	0	0	0	0	0	0	0	0	0	0	0	0	0
hsa-miR-181d-5p	1.83262	0	0	0	3.64741	2.47395	6.65836	2.44166	5.63661	9.02958	10.4994	18.1013	3.7263	4.36366	5.59397	8.40852	6.75508	4.71708	3.869	4.22514	7.40993	9.33686	7.579	7.38882	11.3806	6.0569	2.73057	3.28977	1.15159	0	6.70779	6.56071	1.45943	5.03344	6.20324	0	2.44944	11.9733	2.64044	3.37499
hsa-miR-452-5p	1.83262	0	0	0	0.364741	0.618487	0	0	0.939436	0	0	9.05067	0	0	1.39849	0	0	0	3.0952	0	1.85248	1.33384	0	0.56837	1.26451	0	0.606794	2.19318	1.15159	11.3757	0	0	0	0	0	0	0	0	5.28087	0
hsa-miR-1179	1.83262	0	0	0	1.8237	0.618487	0	0	0.939436	0	3.4998	18.1013	3.7263	0	1.39849	0	0.750564	0	0.7738	4.22514	0.463121	2.66767	2.16543	1.70511	1.26451	0.672989	1.51698	4.38636	1.15159	0	0	0	2.91887	0	2.06775	0	0	0	2.64044	0
hsa-miR-940	1.83262	0	0	0	0.729481	0	0	0	0	0	0	0	0	0	0	0	0	0	0	0	0	0	0	0	0	0	0.303397	1.09659	0	0	0	0	0	0	0	0	0	0	0	0
hsa-miR-4715-5p	1.83262	1.34682	0	0	0.364741	0	0	0	0	0	0	0	0.745261	0	1.39849	0	0	0	0	0	0	0	0	0.56837	0	0	0	0	0	0	0	0	0	0	0	0	0	0	0	0
hsa-miR-369-3p	1.83262	0	2.23106	4.99448	0.364741	0.618487	0	0	0.939436	0	1.7499	0	0	1.45455	0	0	6.00452	1.57236	0.7738	1.05629	6.48369	0	5.41357	2.27348	2.52902	1.34598	0	2.19318	0	3.79191	0	3.28035	0	1.67781	2.06775	1.65598	0	0	0	3.37499
hsa-miR-382-3p	1.83262	0	2.23106	0	0.364741	0.618487	0	0	0	0	0	0	0	0	0	0	0.750564	0	0	0	3.70497	0	0	0	1.26451	0	0	0	0	1.26397	0	0	0	1.67781	0	3.31196	0	0	0	1.6875
hsa-miR-500b-5p	1.83262	4.04046	0	0	1.09422	4.9479	0.832296	1.22083	1.87887	0	0	0	2.23578	0	2.79699	0	2.25169	3.14472	0	0	0	1.33384	1.08271	0.56837	0.632256	0	2.12378	2.19318	0	0	2.23593	0	0	3.35563	0	3.31196	1.22472	0	2.64044	0
hsa-miR-5188	1.83262	0	0	0	0	0	0	0	0.939436	0	0	0	0.745261	0	0	0	0	0	0	0	0	0	0	0	0	0	0	0	0	0	0	0	0	0	0	0	0	0	0	0
hsa-miR-4781-3p	1.83262	0	0	0	0.364741	0.618487	0.832296	1.22083	0.939436	0	0	0	0	0	0	0	0	1.57236	0	0	0	0.666919	0	0.56837	0	0.672989	1.51698	0	0	0	0	0	0	1.67781	0	0	0	2.39466	0	0
hsa-miR-10399-5p	1.83262	1.34682	4.46212	4.99448	0.729481	0	0	1.22083	3.75774	0	1.7499	9.05067	0	0	2.79699	0	3.00226	0	1.5476	0	3.70497	2.00076	5.41357	1.13674	0	2.69195	1.51698	0	1.15159	6.31984	0	3.28035	0	0	0	1.65598	0	0	2.64044	0
hsa-miR-4709-5p	1.83262	1.34682	0	2.49724	2.18844	0.618487	1.66459	0	0.939436	1.50493	0	0	1.49052	1.45455	0	0	1.50113	1.57236	3.0952	0	0.463121	0.666919	2.16543	0.56837	0	0.672989	0.303397	0	0	0	0	0	1.45943	0	0	0	0	0	0	0
hsa-miR-6500-3p	1.83262	1.34682	0	0	4.01215	0.618487	1.66459	1.22083	4.69718	1.50493	3.4998	9.05067	2.98104	4.36366	0	4.20426	4.50339	0	2.3214	4.22514	2.77872	2.66767	3.24814	0.56837	0.632256	3.36494	1.51698	1.09659	2.30317	0	0	0	8.75661	0	4.13549	0	3.67417	0	0	3.37499
hsa-miR-3937	1.83262	0	0	0	0.364741	0.618487	0	0	0.939436	0	0	0	0	0	0	0	0	0	0	0	0	0	0	0	0	0	0	0	0	0	0	0	0	1.67781	2.06775	0	0	0	0	0
hsa-miR-1247-5p	1.83262	0	2.23106	0	0.364741	0	0	0	0	0	1.7499	0	0	0	0	0	0	0	0	0	0.463121	0	2.16543	1.13674	1.26451	0	0.606794	1.09659	1.15159	10.1118	0	0	1.45943	1.67781	0	1.65598	0	0	0	1.6875
hsa-miR-132-5p	1.83262	1.34682	6.69318	0	4.01215	4.32941	2.49689	2.44166	10.3338	4.51479	0	9.05067	4.47156	2.9091	4.19548	0	0.750564	4.71708	7.738	7.394	2.77872	2.66767	1.08271	5.11533	4.42579	2.69195	3.33737	0	2.30317	8.84778	4.47186	0	2.91887	5.03344	4.13549	1.65598	2.44944	7.18399	5.28087	1.6875
hsa-miR-660-3p	1.83262	1.34682	6.69318	0	6.56533	8.04034	4.16148	4.88331	4.69718	3.00986	3.4998	9.05067	7.45261	5.81821	8.39096	0	9.00677	0	6.9642	2.11257	3.24185	9.33686	3.24814	6.25208	3.79353	4.03793	7.88832	4.38636	1.15159	3.79191	4.47186	3.28035	2.91887	6.71126	4.13549	6.62392	3.67417	11.9733	7.92131	0
hsa-miR-766-3p	1.83262	1.34682	2.23106	0	6.56533	4.9479	2.49689	3.66249	3.75774	3.00986	1.7499	0	0.745261	1.45455	2.79699	0	6.00452	1.57236	1.5476	1.05629	2.3156	4.66843	0	6.25208	3.79353	2.69195	4.24756	2.19318	0	1.26397	2.23593	0	4.3783	0	4.13549	1.65598	1.22472	2.39466	0	5.06249
hsa-miR-136-5p	1.83262	2.69364	0	9.98896	0	0.618487	0.832296	1.22083	0	0	1.7499	0	0.745261	5.81821	0	0	7.50564	0	0.7738	0	4.16809	1.33384	2.16543	1.13674	1.26451	0	0	1.09659	3.45476	2.52794	6.70779	3.28035	2.91887	3.35563	2.06775	1.65598	0	2.39466	0	6.74999
hsa-miR-1251-5p	1.83262	8.08092	0	4.99448	7.29481	5.56639	3.32918	1.22083	9.39436	4.51479	12.2493	0	5.21683	14.5455	1.39849	4.20426	11.2585	1.57236	3.869	3.16886	6.48369	3.33459	2.16543	6.25208	3.79353	7.40288	4.24756	4.38636	4.60635	6.31984	2.23593	0	2.91887	3.35563	8.27099	13.2478	2.44944	0	10.5617	10.125
hsa-miR-378i	1.83262	10.7746	4.46212	7.49172	12.4012	10.5143	13.3167	10.9875	9.39436	0	12.2493	9.05067	11.1789	13.091	8.39096	12.6128	11.2585	14.1512	8.5118	7.394	7.40993	8.66994	9.74443	8.52556	12.0129	8.07586	8.19172	9.86931	11.5159	32.8632	4.47186	0	5.83774	6.71126	10.3387	8.2799	12.2472	2.39466	2.64044	5.06249
hsa-miR-422a	1.83262	0	0	0	2.18844	1.23697	2.49689	1.22083	0.939436	0	1.7499	0	0.745261	1.45455	2.79699	0	1.50113	4.71708	0.7738	1.05629	1.85248	2.00076	1.08271	1.13674	1.89677	2.01897	0.910191	1.09659	0	8.84778	0	0	1.45943	0	0	3.31196	2.44944	0	0	3.37499
hsa-miR-378c	1.83262	2.69364	4.46212	2.49724	2.18844	1.85546	0.832296	2.44166	4.69718	0	0	0	0.745261	0	1.39849	0	4.50339	1.57236	0.7738	0	3.24185	2.00076	0	1.70511	1.89677	1.34598	0.910191	0	0	7.58381	0	3.28035	0	1.67781	4.13549	1.65598	0	0	0	0
hsa-miR-3176	1.83262	1.34682	0	0	0	0	0	0	0.939436	0	1.7499	0	0	0	0	0	0	0	0	0	0	0	0	0	0.632256	1.34598	0.606794	0	0	0	0	0	0	3.35563	0	0	0	0	0	0
hsa-miR-643	1.83262	0	0	0	0.364741	0.618487	0.832296	0	1.87887	0	1.7499	0	1.49052	0	0	0	0.750564	1.57236	0	0	0.926242	1.33384	0	1.70511	1.89677	0	0.303397	1.09659	1.15159	1.26397	0	3.28035	0	1.67781	2.06775	1.65598	0	0	0	0
hsa-miR-548ax	1.83262	1.34682	4.46212	0	0.364741	2.47395	0	4.88331	0.939436	0	5.2497	0	2.23578	1.45455	0	0	0	0	0.7738	0	1.38936	0	0	1.13674	2.52902	0.672989	0.303397	0	1.15159	0	0	0	0	3.35563	0	0	2.44944	0	0	0
hsa-miR-219a-1-3p	1.83262	5.38728	4.46212	2.49724	2.55318	2.47395	4.16148	2.44166	2.81831	3.00986	6.9996	9.05067	1.49052	0	1.39849	0	2.25169	1.57236	1.5476	2.11257	3.24185	3.33459	1.08271	1.70511	2.52902	0.672989	0.910191	6.57954	0	2.52794	2.23593	6.56071	0	3.35563	4.13549	0	1.22472	2.39466	5.28087	0
hsa-miR-3194-3p	1.83262	0	0	0	0	0	0	0	0	0	0	0	0	0	0	0	0	0	0	0	0	0.666919	0	0	0	0.672989	0	0	0	0	0	0	0	0	0	0	0	0	0	0
hsa-miR-659-5p	1.83262	2.69364	2.23106	0	1.45896	1.23697	2.49689	2.44166	2.81831	4.51479	3.4998	0	0.745261	0	1.39849	0	0.750564	0	1.5476	1.05629	2.3156	1.33384	3.24814	0.56837	4.42579	0	0.910191	1.09659	1.15159	1.26397	2.23593	0	2.91887	3.35563	2.06775	1.65598	3.67417	0	0	1.6875
hsa-miR-6717-5p	1.83262	0	0	0	0	0	0.832296	0	0	0	0	0	0	0	0	0	0	0	0	0	0	0	0	0.56837	0	0	0	1.09659	0	0	0	0	0	0	0	0	0	0	0	0
hsa-miR-6877-5p	1.83262	0	2.23106	0	1.45896	0.618487	1.66459	0	0.939436	1.50493	0	0	0	0	0	0	0.750564	0	1.5476	0	0.926242	0.666919	0	0.56837	0	0.672989	0.303397	1.09659	1.15159	2.52794	0	0	0	0	0	0	0	0	2.64044	0
hsa-miR-616-3p	1.83262	0	4.46212	2.49724	1.8237	1.23697	0.832296	1.22083	0.939436	3.00986	0	9.05067	0.745261	1.45455	0	0	0.750564	0	0.7738	2.11257	1.85248	0	3.24814	0.56837	1.89677	3.36494	0.910191	3.28977	0	1.26397	0	0	0	1.67781	2.06775	4.96794	2.44944	0	2.64044	0
hsa-miR-19b-1-5p	1.83262	1.34682	0	4.99448	0	0	1.66459	0	0.939436	1.50493	0	0	0	0	1.39849	0	1.50113	3.14472	0	2.11257	0.463121	1.33384	2.16543	1.70511	0	1.34598	0.606794	2.19318	1.15159	1.26397	0	0	1.45943	0	0	1.65598	1.22472	0	5.28087	1.6875
hsa-miR-208b-3p	1.83262	0	0	0	0	0	0.832296	0	0	1.50493	0	0	2.23578	0	0	0	0.750564	0	0.7738	0	0	0.666919	1.08271	0	1.89677	0.672989	0.910191	1.09659	0	0	0	0	0	0	0	0	0	0	0	0
hsa-miR-377-3p	1.83262	0	0	2.49724	0	0.618487	0	0	0.939436	0	0	0	0	0	0	0	0.750564	0	0	0	0.926242	0	1.08271	0	0	0	0.303397	1.09659	0	3.79191	0	0	0	0	2.06775	0	0	0	0	1.6875
hsa-miR-23c	1.83262	0	4.46212	0	2.18844	3.71092	3.32918	0	2.81831	4.51479	3.4998	0	5.21683	0	1.39849	4.20426	1.50113	0	2.3214	3.16886	4.16809	2.00076	1.08271	3.41022	0.632256	2.69195	2.42718	2.19318	4.60635	5.05588	0	9.84106	2.91887	5.03344	4.13549	6.62392	3.67417	0	2.64044	1.6875
hsa-miR-2355-5p	1.83262	0	0	0	0.364741	0	1.66459	0	0	0	0	0	0.745261	0	1.39849	0	0	0	0	1.05629	0.926242	0.666919	0	0.56837	1.89677	0	0.303397	0	1.15159	1.26397	0	0	0	0	0	0	0	0	0	0
hsa-miR-6811-5p	1.83262	0	0	0	0	0	0	0	0	0	0	0	0	0	0	0	0	0	0	0	0	0	0	0	0	0.672989	0	0	0	0	0	3.28035	0	0	0	0	0	0	0	0
hsa-miR-1262	1.83262	6.7341	0	4.99448	4.74163	4.32941	5.82607	4.88331	8.45492	7.52465	1.7499	0	2.23578	1.45455	4.19548	0	4.50339	3.14472	1.5476	3.16886	0.926242	4.00151	4.33086	2.27348	4.42579	3.36494	3.94416	4.38636	2.30317	6.31984	2.23593	3.28035	4.3783	3.35563	8.27099	6.62392	6.12361	0	5.28087	13.5
hsa-miR-6509-5p	1.83262	0	0	0	1.09422	0	0	1.22083	0	0	0	9.05067	1.49052	0	0	0	0	0	0.7738	0	0.463121	0	0	0	0	0.672989	0	0	1.15159	0	2.23593	0	0	0	0	0	0	0	0	0
hsa-miR-514b-3p	1.83262	0	0	0	0	3.09244	0	0	0.939436	0	0	0	1.49052	0	0	4.20426	0	1.57236	0.7738	0	0.926242	0	0	0	0	1.34598	0.606794	1.09659	0	0	0	0	0	0	4.13549	0	0	0	0	1.6875
hsa-miR-548n	1.83262	1.34682	0	2.49724	1.09422	0.618487	0.832296	0	0	0	0	0	0.745261	1.45455	2.79699	4.20426	2.25169	1.57236	0.7738	0	0.463121	0.666919	0	0	0	0	0	0	1.15159	0	0	0	1.45943	0	0	0	0	0	0	1.6875
hsa-miR-548t-5p	1.83262	0	2.23106	0	0.729481	0	0	0	0	0	0	9.05067	0	0	0	0	0	1.57236	0	2.11257	2.3156	1.33384	2.16543	0.56837	1.26451	0	0.303397	0	0	1.26397	0	0	0	0	0	0	0	0	5.28087	0
hsa-miR-548u	1.83262	0	0	0	0.364741	0	0	0	0.939436	0	0	0	0	0	0	0	0	0	0	0	0	0	0	0	0	0.672989	0	0	0	0	0	0	0	0	0	0	0	0	0	0
hsa-miR-7109-3p	1.83262	0	0	0	0	0	0	0	0	0	0	0	0	0	0	0	0	0	0	0	0.463121	0	0	0	0.632256	0	0	0	1.15159	0	0	0	0	0	0	0	0	0	0	0
hsa-miR-33a-3p	1.83262	1.34682	0	2.49724	1.45896	0	0.832296	0	0.939436	0	0	0	0.745261	0	5.59397	0	2.25169	0	1.5476	1.05629	1.85248	1.33384	1.08271	0.56837	0.632256	1.34598	0.910191	0	0	0	0	0	1.45943	1.67781	4.13549	0	2.44944	0	0	1.6875
hsa-miR-624-3p	1.83262	1.34682	0	0	0	0	0	0	0	0	0	9.05067	1.49052	0	0	0	0	0	0	0	0	0	0	0	0	0	0	0	0	0	0	0	0	0	0	0	0	0	0	0
hsa-miR-8485	1.83262	0	2.23106	0	0.364741	1.23697	0.832296	1.22083	2.81831	0	1.7499	0	0.745261	2.9091	1.39849	0	0.750564	1.57236	0.7738	1.05629	0.926242	0	0	1.70511	0	0.672989	0.606794	2.19318	2.30317	5.05588	0	3.28035	0	0	0	0	0	0	2.64044	0
hsa-miR-6510-3p	1.83262	1.34682	4.46212	4.99448	1.45896	1.23697	0.832296	3.66249	0	4.51479	1.7499	0	0	1.45455	2.79699	0	1.50113	1.57236	0.7738	0	0.926242	4.00151	3.24814	1.13674	6.32256	0.672989	0.303397	2.19318	0	7.58381	0	0	7.29717	0	2.06775	1.65598	1.22472	4.78933	0	1.6875
hsa-miR-15a-3p	1.83262	0	0	0	0.364741	0	0	0	0	0	0	0	0	1.45455	1.39849	0	0	0	0	0	0	0	0	0.56837	0	0.672989	0	0	0	1.26397	0	0	0	0	0	0	0	0	0	0
hsa-miR-6735-5p	1.83262	1.34682	4.46212	2.49724	0.364741	1.85546	0	1.22083	0.939436	1.50493	3.4998	0	1.49052	0	1.39849	4.20426	0	3.14472	1.5476	2.11257	0	2.00076	3.24814	0	1.26451	0	0.910191	2.19318	0	1.26397	0	0	2.91887	1.67781	4.13549	0	0	0	0	0
hsa-miR-142-5p	1.83262	2.69364	6.69318	2.49724	10.2127	0	4.99377	1.22083	17.8493	0	6.9996	0	3.7263	0	0	4.20426	3.00226	12.5789	3.0952	4.22514	15.7461	5.33535	7.579	6.82045	17.7032	2.69195	4.24756	1.09659	10.3643	213.611	0	0	13.1349	0	4.13549	3.31196	3.67417	43.104	2.64044	0
hsa-miR-2115-3p	1.83262	1.34682	0	0	0	1.85546	0.832296	0	0	0	0	0	0	0	0	0	0.750564	0	1.5476	0	0	1.33384	0	0.56837	1.89677	0	0.606794	4.38636	0	0	2.23593	3.28035	0	0	0	1.65598	0	0	0	0
hsa-miR-3614-5p	1.83262	2.69364	6.69318	0	1.09422	0.618487	0.832296	0	0.939436	3.00986	5.2497	0	0	1.45455	2.79699	0	1.50113	0	0.7738	2.11257	0.463121	1.33384	1.08271	0.56837	0.632256	0.672989	0.303397	1.09659	1.15159	1.26397	0	3.28035	0	0	0	0	0	0	0	0
hsa-miR-323b-3p	1.83262	1.34682	0	0	0.364741	0.618487	0	0	1.87887	3.00986	1.7499	0	0	4.36366	0	0	5.25395	1.57236	1.5476	8.45028	18.988	0.666919	2.16543	1.70511	2.52902	0	0.303397	2.19318	3.45476	3.79191	2.23593	0	2.91887	0	4.13549	3.31196	1.22472	0	0	13.5
hsa-miR-4723-3p	1.83262	0	0	0	0	1.85546	0	2.44166	0	3.00986	1.7499	0	0	1.45455	0	0	2.25169	4.71708	0.7738	1.05629	0	1.33384	1.08271	0.56837	1.89677	0	0.303397	2.19318	0	1.26397	2.23593	3.28035	0	0	6.20324	0	2.44944	0	0	0
hsa-miR-6734-3p	1.83262	2.69364	0	2.49724	0	0.618487	0	2.44166	0.939436	0	0	9.05067	0	0	0	0	0	0	1.5476	0	0.463121	0	2.16543	0	0	0	0.303397	0	1.15159	0	0	0	0	1.67781	0	1.65598	0	0	0	1.6875
hsa-miR-3189-3p	1.83262	0	0	0	0.364741	0	0	0	0	0	0	0	0.745261	0	1.39849	0	0	0	0	1.05629	0.463121	0	0	0.56837	0	0	0	1.09659	0	1.26397	0	0	0	0	0	0	0	0	0	1.6875
hsa-miR-1908-3p	1.83262	0	0	0	0.364741	0	0	0	0	0	0	0	0	0	0	0	0	0	0	0	0	0	0	0	0	0	0	0	0	0	2.23593	0	0	0	0	0	0	0	0	0
hsa-miR-3616-3p	1.83262	1.34682	2.23106	0	0.364741	0	0	0	0.939436	0	1.7499	0	0	0	2.79699	0	0.750564	0	0.7738	0	0.926242	1.33384	0	0	0.632256	0.672989	0.606794	1.09659	0	0	4.47186	0	0	0	2.06775	0	0	0	0	0
hsa-miR-1251-3p	1.83262	0	0	0	0.364741	1.23697	0	0	0	0	1.7499	0	0	0	0	0	0.750564	0	0	0	0.463121	0	1.08271	0.56837	0	0.672989	0	0	0	0	0	0	1.45943	0	0	0	0	0	0	0
hsa-miR-363-5p	1.83262	0	2.23106	0	1.09422	0.618487	0.832296	1.22083	0.939436	3.00986	0	0	0.745261	1.45455	0	0	3.00226	7.86179	0.7738	0	7.87305	1.33384	0	2.27348	5.05805	7.40288	2.42718	0	10.3643	0	0	3.28035	0	1.67781	0	0	0	0	2.64044	0
hsa-miR-181b-3p	1.83262	0	0	0	3.28266	3.09244	2.49689	6.10414	2.81831	1.50493	3.4998	0	3.7263	5.81821	4.19548	0	2.25169	1.57236	1.5476	1.05629	2.3156	0	1.08271	0	1.26451	2.01897	4.24756	2.19318	2.30317	6.31984	0	0	5.83774	1.67781	4.13549	1.65598	3.67417	2.39466	2.64044	0
hsa-miR-222-5p	1.83262	0	4.46212	0	2.18844	1.85546	0.832296	0	0.939436	0	0	0	0	1.45455	1.39849	4.20426	0	0	2.3214	1.05629	0.463121	2.00076	1.08271	0.56837	1.26451	2.01897	2.73057	0	3.45476	2.52794	0	3.28035	0	0	0	1.65598	1.22472	0	2.64044	1.6875
hsa-miR-188-3p	1.83262	5.38728	0	0	2.91792	2.47395	1.66459	3.66249	4.69718	3.00986	3.4998	0	0.745261	0	1.39849	0	6.00452	0	3.0952	3.16886	5.55745	4.00151	1.08271	2.84185	1.89677	3.36494	3.33737	3.28977	1.15159	2.52794	0	0	1.45943	0	2.06775	0	1.22472	4.78933	0	0
hsa-miR-6726-3p	1.83262	0	2.23106	2.49724	0.729481	0.618487	1.66459	0	1.87887	0	0	0	0	0	0	4.20426	0.750564	0	0.7738	1.05629	0.926242	0	1.08271	0	0	0	0	1.09659	0	0	2.23593	3.28035	2.91887	1.67781	0	1.65598	1.22472	0	0	3.37499
hsa-miR-1287-3p	1.83262	0	0	0	0	0	0	0	0	0	0	0	0	0	0	0	0	0	0	0	0	0	0	0	0	0	0	0	0	1.26397	0	0	0	0	0	0	0	0	0	0
hsa-let-7a-2-3p	1.83262	0	0	0	0.364741	0	0	0	0	0	0	0	0	0	0	0	0	0	0	0	0.463121	0	0	0.56837	0	0	0	0	0	0	0	0	0	0	2.06775	0	0	0	0	0
hsa-miR-676-3p	1.83262	9.42774	2.23106	22.4752	1.09422	4.9479	4.16148	3.66249	5.63661	1.50493	5.2497	0	3.7263	2.9091	0	4.20426	4.50339	4.71708	2.3214	1.05629	8.79929	2.66767	3.24814	3.97859	4.42579	8.74885	3.94416	0	3.45476	2.52794	2.23593	0	2.91887	8.38907	2.06775	3.31196	1.22472	2.39466	7.92131	1.6875
hsa-miR-6809-3p	1.83262	0	0	0	0.364741	0	0	0	0	1.50493	1.7499	0	0	0	0	0	0	0	0	1.05629	0	0.666919	0	0	0.632256	0	0.606794	0	0	1.26397	0	0	0	1.67781	0	1.65598	0	0	0	0
hsa-miR-6885-3p	1.83262	0	0	0	0.364741	0	1.66459	1.22083	0	0	3.4998	0	0	0	0	0	0.750564	0	0.7738	1.05629	0	0	0	0.56837	0.632256	0	0.303397	0	0	0	0	0	0	0	0	0	0	0	0	0
hsa-miR-551b-5p	1.83262	1.34682	2.23106	0	0	1.23697	1.66459	0	1.87887	0	1.7499	0	2.23578	1.45455	0	4.20426	0	0	2.3214	1.05629	0.463121	2.00076	2.16543	3.97859	0.632256	0.672989	2.12378	1.09659	0	0	0	0	0	1.67781	0	0	0	0	0	1.6875
hsa-miR-2278	1.83262	1.34682	0	0	1.45896	1.23697	1.66459	1.22083	0	1.50493	0	0	0	1.45455	1.39849	8.40852	1.50113	1.57236	0.7738	2.11257	1.85248	2.66767	0	0.56837	1.26451	2.01897	1.21359	1.09659	2.30317	1.26397	0	0	1.45943	0	2.06775	0	2.44944	0	2.64044	0
hsa-miR-590-5p	1.83262	4.04046	4.46212	7.49172	2.91792	4.9479	4.16148	0	4.69718	3.00986	5.2497	0	2.23578	2.9091	6.99247	4.20426	6.00452	1.57236	3.869	0	4.63121	2.66767	0	3.97859	5.6903	4.71092	2.42718	3.28977	3.45476	5.05588	2.23593	0	1.45943	3.35563	2.06775	1.65598	2.44944	4.78933	5.28087	1.6875
hsa-miR-3141	1.83262	1.34682	0	2.49724	0	0	0	0	0	0	0	0	0	0	0	0	0	0	0	0	0	0	0	0	0.632256	0	0.303397	0	1.15159	0	0	0	0	1.67781	0	0	0	0	0	0
hsa-miR-4748	1.83262	1.34682	2.23106	0	1.45896	0	0.832296	1.22083	1.87887	0	1.7499	9.05067	0.745261	0	0	4.20426	1.50113	1.57236	0	1.05629	1.38936	0.666919	2.16543	0	0.632256	0.672989	0.606794	0	1.15159	0	2.23593	0	0	0	0	3.31196	1.22472	0	0	5.06249
hsa-miR-500b-3p	1.83262	1.34682	4.46212	2.49724	5.47111	7.42185	4.99377	4.88331	4.69718	12.0394	0	0	5.96209	4.36366	2.79699	4.20426	6.75508	3.14472	3.0952	0	3.70497	1.33384	7.579	2.27348	7.58707	4.71092	6.06794	5.48295	3.45476	3.79191	4.47186	6.56071	4.3783	1.67781	6.20324	0	2.44944	9.57866	0	1.6875
hsa-miR-10398-3p	1.83262	0	0	2.49724	0.729481	1.23697	0	0	0.939436	0	0	0	0.745261	0	0	0	0.750564	0	0	0	1.38936	2.00076	0	1.13674	0.632256	0.672989	1.51698	0	1.15159	1.26397	4.47186	3.28035	0	1.67781	2.06775	0	0	0	0	0
hsa-miR-345-3p	1.83262	2.69364	2.23106	0	2.18844	2.47395	2.49689	0	0.939436	0	1.7499	0	1.49052	0	0	0	1.50113	1.57236	3.869	2.11257	2.3156	2.66767	2.16543	0.56837	3.16128	2.01897	1.82038	1.09659	1.15159	1.26397	0	0	2.91887	1.67781	0	0	3.67417	2.39466	0	0
hsa-miR-3183	1.83262	0	0	0	0	1.23697	0	2.44166	0.939436	0	0	0	0	2.9091	0	0	0	1.57236	0.7738	0	0.463121	0	0	0	0	0.672989	0.606794	0	0	1.26397	0	0	0	0	0	0	0	0	0	0
hsa-miR-6825-3p	1.83262	0	0	0	0	0	0	0	0	0	0	0	0	0	0	4.20426	0	0	0	1.05629	0	0	0	0	0	0	0	0	0	0	0	0	0	0	0	0	0	0	0	0
hsa-miR-301a-5p	1.83262	6.7341	2.23106	0	2.55318	4.32941	4.16148	3.66249	3.75774	3.00986	5.2497	0	2.98104	7.27276	2.79699	4.20426	6.00452	0	4.6428	4.22514	6.02057	6.66919	6.49628	6.25208	5.05805	3.36494	4.85435	1.09659	1.15159	3.79191	8.94373	3.28035	5.83774	0	4.13549	4.96794	4.89889	11.9733	7.92131	1.6875
hsa-miR-130a-5p	1.83262	1.34682	0	0	0.364741	1.23697	0.832296	0	0.939436	1.50493	3.4998	0	1.49052	1.45455	1.39849	0	0	0	1.5476	3.16886	2.77872	0	0	1.13674	0	2.69195	0.910191	0	0	0	2.23593	6.56071	0	3.35563	0	1.65598	0	0	0	1.6875
hsa-miR-619-5p	1.83262	0	2.23106	0	2.91792	0	2.49689	0	0.939436	4.51479	1.7499	0	2.98104	2.9091	1.39849	0	0.750564	3.14472	2.3214	0	1.85248	1.33384	0	0.56837	0.632256	1.34598	1.51698	0	2.30317	0	0	0	2.91887	0	0	0	1.22472	0	2.64044	1.6875
hsa-miR-4492	1.83262	1.34682	0	4.99448	0.364741	0	0.832296	1.22083	0	0	1.7499	0	0	1.45455	0	0	1.50113	3.14472	0.7738	1.05629	0.463121	0.666919	1.08271	0.56837	0	0.672989	0.303397	0	2.30317	1.26397	2.23593	3.28035	0	1.67781	8.27099	1.65598	0	2.39466	0	0
hsa-miR-4525	1.83262	0	0	0	1.09422	0	0	0	0	0	1.7499	0	0	0	0	0	0	0	0.7738	0	0	0.666919	0	0	0	0	0	0	0	0	0	0	1.45943	0	0	0	0	0	0	0
hsa-miR-92a-2-5p	1.83262	0	0	0	0.729481	0	0	1.22083	0	0	1.7499	0	0.745261	2.9091	0	0	0	1.57236	0	0	0.463121	0.666919	1.08271	0.56837	0.632256	2.69195	0	0	1.15159	0	0	6.56071	1.45943	0	2.06775	0	2.44944	2.39466	0	0
hsa-miR-2116-5p	1.83262	2.69364	6.69318	0	2.91792	3.71092	2.49689	0	1.87887	6.01972	5.2497	0	3.7263	2.9091	1.39849	0	4.50339	3.14472	4.6428	4.22514	1.85248	4.00151	4.33086	2.84185	1.89677	3.36494	1.82038	1.09659	3.45476	0	0	3.28035	4.3783	0	2.06775	0	1.22472	4.78933	2.64044	10.125
hsa-miR-145-5p	1.83262	0	0	0	0	0	0.832296	0	0	0	0	0	0	0	0	0	0	0	2.3214	2.11257	1.38936	0	0	1.70511	0	0	0.606794	1.09659	0	0	2.23593	0	0	0	0	0	0	0	0	1.6875
hsa-miR-1224-5p	1.83262	2.69364	0	0	1.09422	0	0.832296	0	0.939436	0	0	9.05067	0	0	1.39849	0	0	0	1.5476	0	3.24185	0	1.08271	0.56837	1.89677	2.01897	0	0	0	0	2.23593	0	0	0	0	0	0	0	0	0
hsa-miR-33b-5p	1.83262	1.34682	0	0	0.364741	1.85546	0.832296	0	0	1.50493	0	0	1.49052	0	0	0	0.750564	3.14472	0	0	1.38936	1.33384	1.08271	0	0	1.34598	0.606794	0	0	1.26397	4.47186	6.56071	2.91887	1.67781	0	0	0	4.78933	0	1.6875
hsa-miR-6821-5p	1.83262	2.69364	4.46212	2.49724	3.28266	1.85546	0.832296	0	0.939436	6.01972	3.4998	0	4.47156	1.45455	0	0	3.00226	3.14472	2.3214	3.16886	0.926242	0	4.33086	1.13674	1.26451	0	0.910191	0	3.45476	2.52794	0	0	0	0	2.06775	0	0	0	5.28087	0
hsa-miR-3620-5p	1.83262	1.34682	2.23106	2.49724	0	0.618487	0	1.22083	0.939436	0	1.7499	0	0	0	0	0	0	0	0.7738	0	0	0.666919	1.08271	0	0	0	0.303397	0	0	0	2.23593	0	0	0	0	0	0	0	2.64044	0
hsa-miR-147b-3p	1.83262	0	0	7.49172	0.364741	0	0	1.22083	0	0	1.7499	0	0	0	2.79699	0	0	3.14472	2.3214	0	7.87305	2.66767	0	1.13674	1.26451	2.01897	0.303397	0	3.45476	34.1272	0	0	2.91887	5.03344	0	0	1.22472	0	0	0
hsa-miR-629-3p	1.83262	1.34682	0	0	1.09422	1.23697	0.832296	0	0	1.50493	0	0	2.23578	0	4.19548	4.20426	1.50113	1.57236	2.3214	1.05629	0	2.00076	3.24814	1.13674	3.16128	4.03793	2.12378	4.38636	0	1.26397	2.23593	9.84106	2.91887	1.67781	0	0	1.22472	0	0	3.37499
hsa-miR-6732-3p	1.83262	2.69364	0	0	0	0.618487	1.66459	2.44166	0	0	0	0	0	0	1.39849	0	0	0	0	2.11257	1.38936	0.666919	0	0	1.26451	0.672989	0.303397	0	2.30317	1.26397	0	3.28035	2.91887	0	2.06775	1.65598	0	4.78933	2.64044	1.6875
hsa-miR-3912-3p	1.83262	0	2.23106	0	2.18844	3.09244	4.99377	1.22083	0	0	1.7499	0	0.745261	2.9091	0	0	5.25395	1.57236	1.5476	1.05629	1.85248	4.66843	0	0	1.26451	4.71092	3.94416	4.38636	2.30317	7.58381	2.23593	9.84106	2.91887	1.67781	4.13549	0	2.44944	0	7.92131	0
hsa-miR-506-3p	1.83262	0	0	0	1.8237	1.23697	0	0	0.939436	0	0	0	0.745261	5.81821	0	0	0	3.14472	1.5476	1.05629	2.3156	2.66767	0	0	0	0	0.606794	1.09659	0	1.26397	0	0	0	0	2.06775	0	1.22472	0	0	3.37499
hsa-miR-3936	1.83262	0	0	0	0.729481	0	0	0	0	0	0	0	0	0	0	0	0	0	0	0	0	0	0	0	0	0	0	0	0	0	0	0	0	0	0	0	0	0	0	0
hsa-miR-18b-5p	1.83262	0	2.23106	0	0.729481	1.85546	0	2.44166	0.939436	0	0	0	0	0	2.79699	0	1.50113	0	0.7738	0	1.85248	0.666919	3.24814	1.13674	0.632256	2.69195	0.606794	1.09659	2.30317	2.52794	0	0	1.45943	0	0	0	0	0	0	0
hsa-miR-6882-5p	1.83262	2.69364	0	2.49724	2.18844	3.09244	2.49689	3.66249	3.75774	4.51479	0	9.05067	0	0	0	0	2.25169	0	0.7738	1.05629	3.24185	1.33384	1.08271	1.70511	0.632256	1.34598	1.21359	2.19318	1.15159	0	0	0	0	0	0	1.65598	1.22472	0	0	1.6875
hsa-miR-890	1.83262	0	2.23106	0	5.10637	0	0.832296	0	0	1.50493	5.2497	9.05067	1.49052	2.9091	4.19548	0	5.25395	0	2.3214	0	9.26242	4.00151	1.08271	1.70511	0.632256	0	16.6868	0	1.15159	1.26397	0	3.28035	2.91887	3.35563	2.06775	1.65598	3.67417	0	13.2022	1.6875
hsa-miR-3614-3p	1.83262	0	0	0	0.364741	0	0.832296	0	0	0	0	0	0	0	0	0	1.50113	0	0	0	0.926242	0	0	0	0.632256	0.672989	0.303397	0	0	0	0	0	0	0	0	0	0	0	0	0
hsa-miR-3174	1.83262	0	0	2.49724	0	0	1.66459	0	0	0	0	0	0	0	0	0	0	1.57236	0.7738	0	0	0	0	0.56837	1.89677	0	0	0	0	3.79191	2.23593	0	0	0	0	0	0	0	0	0
hsa-miR-3688-3p	1.83262	0	0	2.49724	0.729481	3.09244	2.49689	2.44166	1.87887	3.00986	0	0	0.745261	0	0	0	1.50113	0	0.7738	1.05629	0.463121	0.666919	0	0.56837	1.26451	0.672989	0.910191	0	1.15159	0	0	0	0	0	2.06775	0	0	0	0	3.37499
hsa-miR-4802-5p	1.83262	0	0	0	0.364741	0.618487	0	1.22083	1.87887	0	0	0	0.745261	2.9091	4.19548	0	3.75282	1.57236	1.5476	2.11257	1.85248	3.33459	2.16543	1.70511	1.26451	2.01897	1.51698	1.09659	2.30317	3.79191	0	3.28035	2.91887	3.35563	0	0	0	0	0	3.37499
hsa-miR-1323	1.83262	0	0	2.49724	0.729481	0	0	1.22083	0	0	0	0	0	0	0	0	0	3.14472	0	0	0	0	0	0	0.632256	0	0.303397	0	1.15159	0	0	0	1.45943	0	2.06775	0	0	0	0	0
hsa-miR-105-5p	1.83262	1.34682	0	0	1.09422	1.23697	0	3.66249	0.939436	3.00986	6.9996	0	0.745261	1.45455	8.39096	0	0.750564	1.57236	6.9642	5.28143	0	0.666919	1.08271	0	1.89677	0.672989	1.51698	1.09659	3.45476	1.26397	2.23593	0	1.45943	0	0	1.65598	0	0	0	0
hsa-miR-3620-3p	1.83262	1.34682	0	0	1.09422	0	1.66459	4.88331	1.87887	0	1.7499	0	1.49052	1.45455	1.39849	0	3.00226	0	2.3214	0	0	0	0	0.56837	0.632256	2.01897	1.51698	0	0	1.26397	2.23593	6.56071	5.83774	1.67781	0	1.65598	0	0	0	1.6875
hsa-miR-545-3p	1.83262	1.34682	2.23106	2.49724	1.8237	1.85546	1.66459	0	2.81831	0	5.2497	0	2.23578	2.9091	0	0	1.50113	6.28943	1.5476	4.22514	0.926242	2.00076	3.24814	0.56837	1.89677	0.672989	1.51698	3.28977	3.45476	3.79191	4.47186	0	0	0	0	1.65598	1.22472	2.39466	5.28087	3.37499
hsa-miR-4742-5p	1.83262	0	0	2.49724	0.364741	0.618487	0.832296	0	0	0	0	0	0	1.45455	0	0	0	0	3.0952	0	0	0	1.08271	0	0.632256	0.672989	0.606794	2.19318	2.30317	5.05588	2.23593	0	1.45943	0	0	1.65598	1.22472	0	0	0
hsa-miR-584-3p	1.83262	0	2.23106	0	0	0	0	0	0	3.00986	0	0	0	1.45455	0	4.20426	0.750564	0	0.7738	0	1.38936	1.33384	1.08271	0	1.26451	0	0.606794	2.19318	0	0	0	0	0	0	0	0	0	2.39466	0	0
hsa-miR-6777-3p	1.83262	0	0	2.49724	0	0.618487	0.832296	0	0	0	0	0	0	1.45455	1.39849	0	0	0	0	0	0	0.666919	0	0.56837	0.632256	0.672989	0	0	0	0	0	0	1.45943	0	0	0	0	0	0	0
hsa-miR-6803-3p	1.83262	4.04046	2.23106	2.49724	2.18844	0	4.16148	3.66249	3.75774	4.51479	12.2493	9.05067	4.47156	1.45455	2.79699	4.20426	1.50113	4.71708	2.3214	3.16886	3.70497	1.33384	9.74443	2.84185	3.16128	2.01897	3.94416	4.38636	1.15159	5.05588	11.1797	6.56071	1.45943	1.67781	0	9.93588	4.89889	0	5.28087	3.37499
hsa-miR-5009-3p	1.83262	0	0	0	0	0	0	0	0	0	0	0	0	0	0	0	0	0	0	0	0	0	0	0	0	0	0	0	0	0	0	0	0	0	0	0	0	0	0	0
hsa-miR-877-3p	1.83262	2.69364	6.69318	0	1.45896	2.47395	4.99377	6.10414	1.87887	1.50493	3.4998	0	0.745261	5.81821	4.19548	8.40852	1.50113	6.28943	4.6428	3.16886	0.926242	2.66767	4.33086	1.70511	3.16128	0	1.51698	0	5.75793	3.79191	2.23593	0	1.45943	1.67781	0	4.96794	4.89889	0	0	1.6875
hsa-miR-151b	1.83262	1.34682	0	0	0.729481	3.09244	0.832296	1.22083	0.939436	0	1.7499	0	0	1.45455	0	0	1.50113	1.57236	0	1.05629	4.63121	0	2.16543	0.56837	1.26451	6.0569	1.21359	3.28977	4.60635	1.26397	0	0	2.91887	3.35563	2.06775	3.31196	1.22472	2.39466	5.28087	1.6875
hsa-miR-4536-3p	1.83262	0	4.46212	0	0.364741	1.23697	0	1.22083	0	0	0	0	0	0	0	0	0	0	0	0	1.38936	0	0	0.56837	0	0	0.606794	0	0	0	0	0	0	1.67781	2.06775	0	0	0	0	0
hsa-miR-139-5p	1.83262	1.34682	0	0	8.38903	0	2.49689	1.22083	1.87887	1.50493	0	0	2.98104	10.1819	1.39849	0	3.00226	0	0	0	0	2.66767	1.08271	1.13674	0	0.672989	6.97813	0	0	3.79191	0	0	0	1.67781	0	0	1.22472	4.78933	5.28087	0
hsa-miR-6515-3p	1.83262	0	0	0	0.364741	0	0	1.22083	0	0	1.7499	0	0	0	0	0	0	0	0.7738	0	0	0	0	0	1.26451	0	0	1.09659	0	0	0	0	1.45943	0	0	0	0	0	0	1.6875
hsa-miR-3064-5p	1.83262	0	2.23106	2.49724	3.28266	3.09244	2.49689	0	6.57605	1.50493	3.4998	0	2.98104	2.9091	1.39849	0	3.00226	0	3.869	3.16886	3.70497	2.00076	3.24814	4.54696	5.6903	3.36494	2.42718	3.28977	2.30317	2.52794	0	0	1.45943	1.67781	2.06775	3.31196	2.44944	0	0	3.37499
hsa-miR-4742-3p	1.83262	0	0	2.49724	3.28266	0.618487	2.49689	2.44166	0.939436	4.51479	0	0	1.49052	0	1.39849	8.40852	2.25169	0	3.869	0	0.926242	2.00076	0	1.70511	1.26451	0	0.910191	1.09659	0	0	0	3.28035	2.91887	0	0	0	1.22472	0	2.64044	1.6875
hsa-miR-4778-3p	1.83262	0	0	2.49724	0.729481	0.618487	0.832296	0	0	0	0	0	0.745261	1.45455	1.39849	0	0	0	1.5476	0	0.463121	0	1.08271	0.56837	0	0	0	2.19318	0	3.79191	0	0	0	0	0	0	0	0	0	0
hsa-miR-494-3p	1.83262	1.34682	0	2.49724	1.45896	1.23697	0	0	2.81831	4.51479	1.7499	0	0.745261	1.45455	1.39849	0	2.25169	0	0	7.394	21.3036	0	3.24814	1.13674	4.42579	0.672989	0.303397	3.28977	2.30317	1.26397	6.70779	0	1.45943	0	0	3.31196	0	0	2.64044	8.43749
hsa-miR-4738-3p	1.83262	1.34682	0	0	0.364741	0.618487	2.49689	1.22083	0.939436	3.00986	1.7499	0	0	0	1.39849	0	0	1.57236	1.5476	3.16886	0.463121	0	1.08271	0	1.26451	0	0	1.09659	0	0	0	0	0	0	2.06775	3.31196	1.22472	2.39466	0	0
hsa-miR-493-3p	1.83262	2.69364	0	4.99448	0.364741	0	0	1.22083	2.81831	4.51479	5.2497	0	0.745261	2.9091	0	0	2.25169	0	0.7738	3.16886	12.0411	0.666919	1.08271	1.70511	3.16128	0	0.303397	0	0	1.26397	2.23593	3.28035	1.45943	0	0	1.65598	0	2.39466	0	3.37499
hsa-miR-2277-3p	1.83262	0	0	0	0.729481	2.47395	0.832296	2.44166	1.87887	6.01972	0	0	2.98104	1.45455	1.39849	4.20426	3.00226	1.57236	0	4.22514	0.463121	1.33384	3.24814	0.56837	0.632256	4.03793	1.51698	1.09659	0	0	2.23593	3.28035	2.91887	1.67781	2.06775	1.65598	0	2.39466	5.28087	0
hsa-miR-4660	1.83262	1.34682	0	0	1.45896	0.618487	0	0	1.87887	1.50493	1.7499	0	2.98104	0	2.79699	0	1.50113	0	0.7738	2.11257	1.38936	0	0	0.56837	0	0.672989	0.303397	0	0	0	0	0	1.45943	1.67781	0	0	1.22472	0	0	1.6875
hsa-miR-6791-3p	1.83262	2.69364	0	0	1.45896	0	0	0	0	1.50493	1.7499	0	0.745261	0	0	0	0.750564	0	0.7738	1.05629	0.463121	0	1.08271	0.56837	0.632256	0	0.606794	0	0	1.26397	0	0	1.45943	0	0	0	0	0	2.64044	0
hsa-miR-6854-3p	1.83262	0	0	0	0	0	0	0	0	0	0	0	0	0	0	0	0	0	0.7738	0	0	0	0	0.56837	0	0	0	0	0	0	0	0	1.45943	0	0	0	0	0	0	0
hsa-miR-6809-5p	1.83262	0	0	0	0.364741	0	0	0	0	0	0	0	0	0	0	0	0	0	0	1.05629	0	0	1.08271	0.56837	0	0	0	0	0	0	0	0	0	0	0	0	0	0	0	0
hsa-miR-1292-5p	1.83262	2.69364	2.23106	0	0.364741	1.85546	3.32918	2.44166	6.57605	0	6.9996	0	0	0	4.19548	4.20426	0	1.57236	0	0	0.926242	1.33384	1.08271	1.70511	3.16128	0.672989	0.606794	0	3.45476	1.26397	2.23593	0	0	0	2.06775	0	1.22472	0	0	1.6875
hsa-miR-4640-5p	1.83262	0	0	0	0.729481	0.618487	1.66459	0	0	0	0	0	0	0	1.39849	0	0	0	0	1.05629	0.463121	0	0	0	0.632256	0.672989	0	0	0	0	0	0	0	0	2.06775	0	0	0	0	0
hsa-miR-6729-5p	1.83262	1.34682	2.23106	0	0	0	0	0	0	0	0	0	0	0	0	0	0	0	0	1.05629	0	0	0	0	0	0	0	0	0	0	0	0	0	0	0	0	2.44944	0	0	0
hsa-miR-5698	1.83262	0	0	0	0	0	1.66459	0	0	0	3.4998	0	0	0	0	0	0	0	0	0	0	0	0	1.13674	0	1.34598	0.303397	0	1.15159	0	0	0	0	1.67781	0	0	1.22472	0	0	1.6875
hsa-miR-6745	1.83262	0	0	0	0	0	0	0	0	0	0	0	0	0	0	0	0	0	0	0	0	0	0	0	0	0	0	0	0	0	0	0	0	0	0	1.65598	1.22472	0	0	0
hsa-miR-3909	1.83262	0	0	0	0	0.618487	0.832296	0	0	1.50493	0	0	0	1.45455	0	0	0.750564	0	1.5476	0	0.463121	0	1.08271	0	0	0	0.606794	1.09659	0	0	2.23593	0	1.45943	3.35563	0	0	2.44944	0	2.64044	0
hsa-miR-431-5p	1.83262	0	0	0	0	1.23697	0.832296	1.22083	0.939436	0	1.7499	0	0	0	0	0	1.50113	0	0.7738	1.05629	4.63121	1.33384	0	1.13674	0	0	0	0	0	0	0	0	0	0	0	0	0	0	0	1.6875
hsa-miR-4504	1.83262	0	2.23106	0	1.09422	1.23697	1.66459	1.22083	0	1.50493	0	0	0.745261	2.9091	0	0	0	0	1.5476	2.11257	0	1.33384	0	0	0.632256	0	0.606794	2.19318	0	0	2.23593	3.28035	0	0	0	1.65598	0	0	0	0
hsa-miR-6748-5p	1.83262	0	0	0	0	0	0	0	0.939436	0	0	0	0	0	0	0	0	0	0	0	0	0	0	0	0	0	0	0	1.15159	0	0	0	0	0	0	0	0	0	0	0
hsa-miR-6853-3p	1.83262	0	0	0	0.364741	0.618487	0.832296	1.22083	0	0	0	0	0	0	0	0	0	0	0.7738	0	0	1.33384	0	0.56837	0	0	0	1.09659	0	0	2.23593	0	0	0	0	0	0	0	0	0
hsa-miR-3684	1.83262	0	0	0	0.729481	1.23697	0	0	0	0	1.7499	0	0	0	0	0	0	0	0	0	0	0.666919	0	0	0	1.34598	0	0	1.15159	0	0	0	0	0	2.06775	0	1.22472	0	2.64044	0
hsa-miR-9903	1.83262	4.04046	2.23106	4.99448	1.45896	1.23697	1.66459	1.22083	2.81831	1.50493	0	0	2.98104	2.9091	2.79699	0	0	0	1.5476	2.11257	1.85248	2.66767	2.16543	0.56837	1.26451	2.01897	0.606794	1.09659	1.15159	0	0	0	1.45943	1.67781	2.06775	1.65598	1.22472	2.39466	5.28087	1.6875
hsa-miR-1297	1.83262	17.5087	2.23106	12.4862	4.74163	7.42185	4.99377	6.10414	2.81831	4.51479	1.7499	18.1013	9.68839	8.72731	9.78945	4.20426	8.25621	4.71708	2.3214	6.33771	16.2092	8.66994	6.49628	3.97859	5.6903	29.6115	3.03397	4.38636	8.0611	6.31984	6.70779	13.1214	5.83774	8.38907	4.13549	6.62392	6.12361	7.18399	10.5617	6.74999
hsa-miR-3157-5p	1.83262	2.69364	2.23106	0	2.18844	2.47395	4.16148	2.44166	0.939436	0	1.7499	0	0	1.45455	0	4.20426	0.750564	1.57236	4.6428	1.05629	0	0.666919	8.66171	1.70511	1.89677	3.36494	0.606794	4.38636	3.45476	0	0	3.28035	1.45943	0	0	0	0	0	0	1.6875
hsa-miR-6720-5p	1.83262	0	0	0	0	0.618487	0	0	0.939436	1.50493	0	0	0	0	0	0	0	0	0	0	0	0	0	0	0	0	0	0	0	0	0	0	0	0	0	0	0	2.39466	0	0
hsa-miR-3124-5p	1.83262	4.04046	4.46212	0	0.729481	1.23697	1.66459	6.10414	0.939436	1.50493	0	9.05067	0.745261	1.45455	4.19548	0	2.25169	6.28943	2.3214	2.11257	1.85248	0.666919	2.16543	1.13674	1.26451	0.672989	1.51698	3.28977	1.15159	0	4.47186	3.28035	2.91887	0	6.20324	0	0	0	0	0
hsa-miR-4798-5p	1.83262	0	0	0	0.364741	0.618487	0.832296	0	0	0	3.4998	0	1.49052	0	0	0	0.750564	0	0	1.05629	0.463121	1.33384	0	1.13674	0.632256	0.672989	0	0	0	1.26397	0	0	0	0	0	0	0	0	0	1.6875
hsa-miR-3187-3p	1.83262	1.34682	0	0	0.729481	0	1.66459	1.22083	0	1.50493	0	0	0	1.45455	2.79699	0	3.00226	0	0	0	0.926242	2.00076	0	0	2.52902	0	0.606794	0	0	0	2.23593	3.28035	1.45943	0	0	0	1.22472	0	2.64044	0
hsa-miR-6842-3p	1.83262	0	2.23106	4.99448	1.45896	1.85546	0.832296	0	0.939436	0	3.4998	0	3.7263	0	2.79699	0	0	0	0	1.05629	0.926242	2.00076	0	1.13674	1.26451	2.69195	1.51698	0	3.45476	1.26397	0	0	1.45943	0	4.13549	0	1.22472	0	0	1.6875
hsa-miR-450b-3p	1.83262	0	0	0	0	0	0	0	0	0	0	0	0	0	2.79699	0	0	0	0	0	0	0	0	0	0	0	0	0	0	0	0	0	0	0	0	0	0	0	0	0
hsa-miR-6513-5p	1.83262	2.69364	0	2.49724	0.729481	0.618487	3.32918	2.44166	0.939436	0	0	0	0	0	0	0	1.50113	1.57236	0.7738	0	1.38936	1.33384	2.16543	0	0.632256	1.34598	1.82038	2.19318	0	1.26397	0	3.28035	0	1.67781	2.06775	1.65598	0	0	0	1.6875
hsa-miR-5010-3p	1.83262	2.69364	0	0	1.09422	1.23697	1.66459	3.66249	2.81831	0	1.7499	0	0.745261	1.45455	1.39849	0	1.50113	1.57236	3.0952	2.11257	1.38936	1.33384	2.16543	1.70511	1.89677	0.672989	1.51698	0	0	1.26397	0	0	1.45943	0	4.13549	3.31196	0	2.39466	0	0
hsa-miR-548ap-3p	0	0	0	0	0	0	0	0	0	0	0	0	0	0	0	0	0	0	0	0	0	0	0	0	0	0	0	0	0	1.26397	0	0	0	0	0	0	0	0	0	0
hsa-miR-548t-3p	0	0	0	0	0.364741	0.618487	0	0	0.939436	0	0	0	0	0	0	0	0	0	0	0	0.463121	0	0	0	0	0	0	1.09659	0	0	0	0	0	0	0	0	0	0	0	0
hsa-miR-548az-3p	0	1.34682	0	0	0	0	0	0	0	0	0	0	0	0	0	0	0	0	0	0	0	0.666919	0	0	0	0	0	1.09659	0	0	0	0	0	0	2.06775	0	0	0	0	0
hsa-miR-548f-3p	0	0	0	0	0	1.23697	0	1.22083	0	0	0	0	0	0	0	0	1.50113	1.57236	0	0	0	0.666919	0	0.56837	0.632256	0.672989	0.606794	1.09659	0	1.26397	0	0	0	1.67781	2.06775	0	0	0	0	0
hsa-miR-548bc	0	1.34682	2.23106	0	0.729481	1.23697	0	0	0	0	0	0	1.49052	0	0	0	1.50113	0	0	0	0	1.33384	1.08271	1.13674	0	0	0.606794	1.09659	1.15159	1.26397	0	0	0	1.67781	0	0	1.22472	2.39466	0	1.6875
hsa-miR-553	0	0	0	0	0	0	0	0	0	0	0	0	0	0	0	0	0	0	0	0	0	0	0	0	0	0	0	0	0	0	0	0	0	0	0	0	0	0	0	0
hsa-miR-7844-5p	0	0	0	0	0	0	0	0	0	0	0	0	0	0	0	0	0	0	0	0	0	0	0	0	0	0	0	0	0	0	0	0	0	0	0	0	0	0	0	0
hsa-miR-548av-3p	0	0	0	0	0.364741	0	0	0	0	0	0	0	0	1.45455	0	0	0	0	0	0	0	0	0	0	0.632256	0	0	0	0	0	0	0	0	0	0	0	0	0	0	0
hsa-miR-548g-3p	0	0	0	0	0	0	0	0	0	0	0	0	0	0	0	0	0	0	0	0	0	0	0	0	0	0	0	0	0	0	0	0	0	0	0	1.65598	0	0	0	0
hsa-miR-6835-3p	0	0	0	0	0	0	0	0	0	0	0	0	0	0	0	0	0	0	0	0	0	0	0	0	0	0	0	0	0	0	0	0	0	0	0	0	0	0	0	0
hsa-miR-4422	0	0	0	0	0	0	0.832296	0	0	0	0	0	0	0	0	0	0	0	0	0	0	0	0	0.56837	0.632256	0	0	0	0	0	0	0	0	0	0	0	0	0	0	0
hsa-miR-4429	0	0	0	0	0	0.618487	0	1.22083	0.939436	0	0	0	0	0	0	0	0	0	0	2.11257	0	0.666919	0	0	0	0	0	0	0	0	0	6.56071	0	0	0	1.65598	1.22472	0	0	0
hsa-miR-548an	0	0	0	0	0	0	0	0	0	0	0	0	0.745261	0	0	0	0	0	0	0	0	0	0	0	0	0	0	0	0	0	0	0	0	0	0	0	0	0	0	0
hsa-miR-4484	0	0	0	0	0.729481	0.618487	0	0	0.939436	0	0	0	0	0	0	0	0	0	0	0	0	0	0	0	0	0	0	0	0	0	0	0	0	0	0	0	0	0	0	0
hsa-miR-10526-3p	0	0	0	0	0	1.23697	0	0	0.939436	0	0	0	0.745261	0	0	0	0	0	0	2.11257	0	0	0	0	0	0	0.303397	0	0	0	0	0	0	0	2.06775	0	0	0	0	0
hsa-miR-548bb-5p	0	0	0	0	0	0	0	0	0	0	0	0	0	0	0	0	0	0	0	0	0	0	0	0	0	0	0	0	0	0	0	0	0	0	0	0	0	0	0	0
hsa-miR-548w	0	0	0	0	0	0	0	0	0	0	0	0	0	0	0	0	0	0	0	0	0	0	0	0	0.632256	0	0	0	0	0	0	0	0	0	0	0	0	0	0	0
hsa-miR-548y	0	0	0	0	0	0	0	0	0	0	0	0	0	0	0	0	0	0	0	0	0	0	0	0	0	0	0	0	0	0	0	0	0	0	0	0	0	0	0	0
hsa-miR-548h-5p	0	1.34682	0	0	0	0	0.832296	0	0	0	0	0	0.745261	0	1.39849	0	0.750564	0	0.7738	1.05629	0	0	0	0	0	0	0	0	0	0	0	0	1.45943	0	0	0	0	2.39466	0	0
hsa-miR-548ar-5p	0	0	0	0	0.364741	0	0	0	0	0	0	0	0	0	1.39849	0	0.750564	0	0	0	0	0	0	0	0	0	0	0	0	0	0	0	0	0	0	0	0	0	0	0
hsa-miR-548a-5p	0	0	0	0	0	0	0	1.22083	0	0	0	0	0	1.45455	0	0	0	0	0	0	0	0	0	0	0	0	0	0	0	0	0	0	0	0	0	0	0	0	0	0
hsa-miR-548as-5p	0	0	0	0	0.729481	0.618487	0	1.22083	0	0	0	0	0	0	0	0	0	0	0	0	0	0	0	0	0	1.34598	0	0	0	1.26397	0	0	0	0	0	0	0	0	0	0
hsa-miR-548j-5p	0	4.04046	2.23106	2.49724	4.37689	5.56639	2.49689	0	4.69718	3.00986	5.2497	0	1.49052	0	1.39849	0	2.25169	1.57236	6.1904	5.28143	3.70497	0.666919	8.66171	1.70511	4.42579	2.69195	4.24756	3.28977	3.45476	2.52794	4.47186	3.28035	1.45943	1.67781	6.20324	0	3.67417	0	0	3.37499
hsa-miR-548ab	0	0	0	2.49724	0.729481	1.85546	0.832296	0	0	4.51479	0	0	0	0	0	0	0	3.14472	2.3214	0	0	0	2.16543	0	1.26451	1.34598	0.910191	0	0	0	2.23593	0	0	1.67781	2.06775	0	0	0	2.64044	1.6875
hsa-miR-548av-5p	0	0	0	0	0	0	0	0	0	0	0	0	0	0	0	0	0	0	0	0	0	0	0	0	0	0	0	0	0	0	0	0	0	0	0	0	0	0	0	0
hsa-miR-548k	0	0	4.46212	0	1.8237	4.32941	2.49689	1.22083	2.81831	4.51479	0	9.05067	1.49052	0	1.39849	4.20426	1.50113	0	1.5476	2.11257	0.926242	0.666919	3.24814	2.27348	3.79353	1.34598	0.910191	2.19318	0	5.05588	0	6.56071	2.91887	1.67781	0	0	3.67417	0	7.92131	0
hsa-miR-548l	0	0	2.23106	0	0.364741	0.618487	0	0	0.939436	1.50493	0	0	1.49052	0	1.39849	0	0	0	1.5476	2.11257	0.463121	0.666919	3.24814	0	1.89677	0.672989	0	0	0	5.05588	2.23593	3.28035	1.45943	0	2.06775	0	1.22472	0	0	0
hsa-miR-548ah-5p	0	0	0	0	0.364741	0	0	0	0	0	0	0	0	0	0	0	0	0	0	0	0	0.666919	0	0	0	0	0.303397	0	0	0	0	3.28035	0	0	0	0	0	0	0	0
hsa-miR-548at-5p	0	0	0	0	0.364741	0	0	0	0	0	0	0	0	0	0	0	0.750564	0	0	0	0	0	0	0	0	0	0	0	0	0	0	0	0	0	0	0	0	0	0	0
hsa-miR-3646	0	0	0	0	0	0	0	0	0	0	0	0	0	0	0	0	0	0	0	0	0	0	0	0	0	0	0	0	0	0	0	0	0	0	0	0	0	0	0	0
hsa-miR-224-3p	0	1.34682	2.23106	0	0	0	0	0	0	0	0	0	0	0	0	0	0	0	0.7738	0	0	0	0	0	0	0	0	0	0	0	0	0	0	0	0	0	0	0	0	0
hsa-miR-522-3p	0	0	0	0	0	0	0	0	0	0	0	0	0	0	0	0	0	0	0	0	0	0	0	0	0	0	0	0	0	0	0	0	0	0	0	0	0	0	0	0
hsa-miR-3606-3p	0	0	0	0	0	0	0	0	0	0	0	0	0	0	0	0	0	0	0	0	0	0	0	0	0	0	0	0	0	0	0	0	0	0	0	0	0	0	0	0
hsa-miR-495-3p	0	0	0	0	0	0.618487	0	0	0	0	0	0	0	0	0	0	0	0	0	0	0.463121	0	0	0	0	0	0	1.09659	0	0	0	0	0	0	0	0	0	0	0	0
hsa-miR-122b-3p	0	0	0	0	0	0	0	0	0	0	0	0	0	0	0	0	0	0	0	0	0	0	0	0	0	0	0	0	0	0	0	0	0	0	0	0	0	0	0	0
hsa-miR-543	0	0	0	0	0	0	0	0	0.939436	0	0	0	0	0	0	0	0	0	0	1.05629	0.926242	0	0	0	0	0	0	0	0	0	0	0	0	0	0	1.65598	0	0	0	0
hsa-miR-649	0	0	0	0	0	0	0	0	0	0	0	0	0	0	0	0	0	0	0	0	0	0	0	0	0	0	0	0	0	0	0	0	0	0	0	0	0	0	0	0
hsa-miR-5583-5p	0	0	0	0	0	0	0	0	0	0	0	0	0	0	0	0	0	0	0	0	0	0	0	0	0	0	0	0	0	0	0	0	0	0	0	0	0	0	0	0
hsa-miR-3129-3p	0	0	0	0	0	0	0	0	0.939436	0	0	0	0	0	1.39849	0	0	0	0	0	0	0	0	0.56837	0	0.672989	0	0	0	2.52794	0	0	0	0	0	0	0	0	0	0
hsa-miR-606	0	0	0	0	0	0	0	0	0	0	0	0	0	0	0	0	0	0	0	0	0	0	0	0	0	0	0	0	0	0	0	0	0	0	0	0	0	0	0	0
hsa-miR-3617-5p	0	0	0	0	0	0	0	1.22083	0	0	1.7499	0	0	0	0	0	0.750564	0	0	0	0	0	0	0	0.632256	0	0.303397	0	0	1.26397	0	0	1.45943	0	0	0	0	0	2.64044	0
hsa-miR-3667-5p	0	0	0	0	0	0	0	0	0	0	0	0	0	0	0	0	0	0	0	0	0	0	0	0	0	0	0	0	0	0	0	0	0	0	0	0	0	0	0	0
hsa-miR-548ao-3p	0	0	0	0	0	0	0	0	0	0	0	0	0	0	0	0	0	0	0	0	0	0	0	0	0	0	0	0	0	0	0	0	0	0	0	0	0	0	0	0
hsa-miR-4432	0	0	0	0	0	0	0	0	0	0	0	0	0	0	0	0	0	0	0	0	0	0	0	0	0	0	0	0	0	0	0	0	0	0	0	0	0	0	0	0
hsa-miR-4662a-3p	0	0	0	0	0	0	0	0	0	1.50493	0	0	0	0	0	0	0	0	0	0	0	0.666919	0	0	0	0	0	0	1.15159	0	0	0	0	0	0	0	0	0	0	0
hsa-miR-3156-5p	0	0	0	0	0	0	0	0	0	0	0	0	0	0	0	0	0	0	0	0	0	0	0	0	0	0	0	0	0	0	0	0	0	0	0	0	0	0	0	0
hsa-miR-4662b	0	0	0	0	0	0	0	0	0	0	0	0	0	0	0	0	0	0	0	0	0	0	0	0	0	0	0	0	0	0	0	0	0	0	0	0	0	0	0	0
hsa-miR-498-3p	0	0	0	0	0	0	0	0	0	0	0	0	0	0	0	0	0	0	0	0	0	0	0	0	0	0	0	0	0	0	0	0	0	0	0	0	0	0	0	0
hsa-miR-518e-3p	0	0	0	0	0	0	0	0	0	0	0	0	0	0	0	0	0	0	0	0	0	0	0	0	0	0	0	0	0	0	0	0	0	0	0	0	0	0	0	0
hsa-miR-651-3p	0	0	0	0	0	0	0	0	0	0	0	0	0.745261	0	0	0	0	0	0	0	0	0	0	0	0.632256	0	0	1.09659	0	0	0	0	0	0	0	0	0	0	0	0
hsa-miR-3173-3p	0	0	0	0	0.729481	0	0	0	0	1.50493	1.7499	0	0	0	0	0	0	0	0	0	0	0	0	0	0	1.34598	0	0	0	0	0	0	1.45943	0	0	0	0	0	0	0
hsa-miR-541-5p	0	0	0	0	0	0	0	0	0	0	0	0	0	0	0	0	0	0	0	0	0	0	0	0	0	0	0	0	0	0	0	0	0	0	0	0	0	0	0	0
hsa-miR-3910	0	0	0	0	0	0	0	0	0	0	0	0	0	0	0	0	0	0	0	0	0	0	0	0	0	0	0	0	0	0	0	0	0	0	0	0	0	0	0	0
hsa-miR-570-5p	0	0	0	0	0	0	0	0	0	0	0	0	0	0	0	0	0	0	0	0	0	0	0	0	0	0	0	0	0	0	0	0	0	0	0	0	0	0	0	0
hsa-miR-548ag	0	0	0	0	0	0.618487	0	0	0	0	0	0	0	0	0	0	0	0	0	0	0	0.666919	0	0	0	0	0	0	1.15159	0	0	0	0	1.67781	0	0	0	0	0	0
hsa-miR-3974	0	0	0	0	0	0	0	0	0	0	0	0	0	0	0	0	0	0	0	0	0	0	0	0	0	0	0	0	0	0	0	0	0	0	0	0	0	0	0	0
hsa-miR-4735-3p	0	0	0	0	0	0	0	0	0	0	0	0	0	0	0	0	0	0	0	0	0	0	0	0	0	0	0	0	0	0	0	0	0	0	0	0	0	0	0	0
hsa-miR-562	0	0	0	0	0	0	0	0	0	0	0	0	0	0	0	0	0	0	0	0	0	0	0	0	0	0	0	0	0	0	0	0	0	0	0	0	0	0	0	0
hsa-miR-3184-3p	0	0	0	0	0	0	0	0	0	0	0	0	0	0	0	0	0	0	0	0	0	0	0	0	0	0	0	0	0	0	0	0	0	0	0	0	0	0	0	0
hsa-miR-519b-3p	0	0	0	0	0	0	0	0	0	0	0	0	0	0	0	0	0	0	0	0	0	0	0	0	0	0	0	0	0	0	0	0	0	0	0	0	0	0	0	0
hsa-miR-519c-3p	0	0	0	0	0	0	0	0	0	0	0	0	0	0	0	0	0	0	0	0	0	0	0	0	0	0	0	0	0	0	0	0	0	0	0	0	0	0	0	0
hsa-miR-372-3p	0	0	0	0	0	0	0	0	0	0	0	0	0	0	0	0	0	0	0	0	0	0	0	0	0	0	0	0	0	0	0	0	0	0	0	0	0	0	0	0
hsa-miR-520a-3p	0	0	0	0	0	0	0	0	0	0	0	0	0	0	0	0	0	0	0	0	0	0	0	0	0	0	0	0	0	0	0	0	0	0	0	0	0	0	0	0
hsa-miR-520b-3p	0	0	0	0	0	0	0	0	0	0	0	0	0	0	0	0	0	0	0	0	0	0	0	0	0	0	0	0	0	0	0	0	0	0	0	0	0	0	0	0
hsa-miR-520c-3p	0	0	0	0	0	0	0	0	0	0	0	0	0	0	0	0	0	0	0	0	0	0	0	0	0	0	0	0	0	0	0	0	0	0	0	0	0	0	0	0
hsa-miR-520e-3p	0	0	0	0	0	0	0	0	0	0	0	0	0	0	0	0	0	0	0	0	0	0	0	0	0	0	0	0	0	0	0	0	0	0	0	0	0	0	0	0
hsa-miR-520d-3p	0	0	0	0	0	0	0	0	0	0	0	0	0	0	0	0	0	0	0	0	0	0	0	0	0	0	0	0	0	0	0	0	0	0	0	0	0	0	0	0
hsa-miR-4517	0	0	0	0	0	0	0	0	0	0	0	0	0	0	0	0	0	0	0	0	0	0	0	0	0	0	0	0	0	0	0	0	0	0	0	0	0	0	0	0
hsa-miR-216b-5p	0	0	0	0	0	0	0	0	0	0	0	0	0	0	0	0	0	0	0	0	0.463121	0	0	0	0	0	0	0	0	0	0	0	0	1.67781	0	0	0	0	0	0
hsa-miR-4506	0	0	0	0	0	0	0	0	0	0	0	0	0	0	0	0	0	0	0	0	0	0	0	0	0	0	0	0	0	0	0	0	0	0	0	0	0	0	0	0
hsa-miR-944	0	0	0	2.49724	0.364741	0	2.49689	1.22083	0	0	1.7499	0	0.745261	0	2.79699	0	0	1.57236	0.7738	0	0.926242	0.666919	1.08271	0	1.89677	0	0.303397	1.09659	0	10.1118	0	3.28035	1.45943	0	4.13549	0	0	2.39466	0	0
hsa-miR-4760-3p	0	0	0	0	0	0	0	0	0	0	0	0	0	0	0	0	0	0	0	0	0	0	0	0	0	0	0	0	0	0	0	0	0	0	0	0	0	0	0	0
hsa-miR-3529-3p	0	0	0	0	0	0	0	0	0	0	0	0	0	0	0	0	0	0	0	0	0	0	0	0	0	0	0	0	0	0	0	0	0	0	0	0	0	0	0	0
hsa-miR-338-5p	0	0	0	0	0.364741	0	0	0	0	0	0	0	0	0	0	0	0	0	0	1.05629	0	0	1.08271	0.56837	0	0.672989	0	0	0	0	0	0	1.45943	0	0	0	0	0	0	0
hsa-miR-329-3p	0	0	0	0	0	0	0.832296	1.22083	0.939436	3.00986	0	0	0	0	0	0	0	0	0	1.05629	2.3156	0.666919	0	0	0	0	0	1.09659	1.15159	0	0	0	0	0	0	0	0	0	0	0
hsa-miR-6757-3p	0	0	0	0	0	0	0	0	0	0	0	0	0	0	0	0	0	0	0	0	0	0	0	0	0	0	0	0	0	0	0	0	0	0	0	0	0	0	0	0
hsa-miR-499a-3p	0	0	0	0	0	0	0	0	0	0	0	0	0	0	0	0	0	0	0	0	0	0	0	0	0	0	0	0	0	1.26397	0	0	0	0	0	0	0	0	0	0
hsa-miR-499b-3p	0	0	0	0	0	0	0	0	0	0	0	0	0	0	0	0	0	0	0	0	0	0	0	0	0	0	0	0	0	0	0	0	0	0	0	0	0	0	0	0
hsa-miR-1255b-2-3p	0	0	2.23106	0	0	0	0	0	0	0	0	0	0	0	0	0	0	0	0	0	0	0	0	0.56837	0	0	0.303397	0	0	0	0	0	0	0	0	0	0	0	0	0
hsa-miR-634	0	0	0	0	0	0	0	0	0	0	0	0	0	0	0	0	0	0	0	0	0	0	0	0	0	0	0	0	0	0	0	0	0	0	0	0	0	0	0	0
hsa-miR-4482-5p	0	0	0	0	0	0	0	0	0	0	0	0	0	0	0	0	0	0	0	0	0	0	0	0	0	0	0	0	0	0	0	0	0	0	0	0	0	0	0	0
hsa-miR-5195-5p	0	0	0	0	0	0	0	0	0	0	0	0	0	0	0	0	0	0	0	0	0	0	0	0	0	0	0	0	0	0	0	0	0	0	0	0	0	0	0	0
hsa-miR-6813-3p	0	0	0	0	0	0	0	0	0	0	0	0	0	0	0	0	0	0	0	0	0	0	0	0	0	0	0	0	0	0	0	0	0	0	0	0	0	0	0	0
hsa-miR-521	0	0	0	0	0	0	0	0	0	0	0	0	0	0	0	0	0	0	0	0	0	0	0	0	0	0	0	0	0	0	0	0	0	0	0	0	0	0	0	0
hsa-miR-122-3p	0	0	0	0	0	0	0	0	0	0	0	0	0	0	0	0	0	0	0	0	0	0	0	0	0	0	0	0	0	0	0	0	0	0	0	0	0	0	0	0
hsa-miR-548al	0	0	0	0	0	0	0	0	0	0	0	0	0	0	0	0	0.750564	0	0	1.05629	0.463121	0	0	0	0	0	0	0	0	0	0	0	0	0	0	0	0	0	0	0
hsa-miR-4681	0	0	0	0	0	0	0	0	0	0	0	0	0	0	0	0	0	0	0	0	0	0	0	0	0	0	0	0	0	0	0	0	0	0	0	0	0	0	0	0
hsa-miR-4661-5p	0	0	0	0	0	0	0	0	0.939436	0	0	0	0	0	0	0	0	1.57236	0	0	0	0	0	0.56837	0	0	0	0	0	0	0	6.56071	0	0	0	0	0	0	0	0
hsa-miR-3923	0	0	0	0	0	0	0	0	0	0	0	0	0	0	0	0	0	0	0	0	0	0	0	0	0	0	0	0	0	0	0	0	0	0	0	0	0	0	0	0
hsa-miR-4798-3p	0	0	0	0	0	0	0	0	0	0	0	0	0	0	0	0	0	0	0	0	0	0	0	0	0	0	0	0	0	0	0	0	0	0	0	0	0	0	0	0
hsa-miR-3145-5p	0	0	0	0	0	0	0	1.22083	0	0	0	0	0	0	0	0	0	1.57236	0	0	0	0	0	0	0	0	0	0	0	0	0	0	0	0	0	0	0	0	0	0
hsa-miR-5684	0	0	0	0	0	0	0	0	0	0	0	0	0	0	0	0	0	0	0	2.11257	1.38936	0	0	0	0.632256	0.672989	0.606794	0	0	1.26397	0	0	0	1.67781	0	0	2.44944	0	0	0
hsa-miR-4714-5p	0	0	0	0	0	0	0	0	0.939436	0	0	0	0	0	0	0	0	0	0	0	0	0.666919	0	0	0	0	0.303397	0	0	0	0	0	0	1.67781	0	0	0	0	0	0
hsa-miR-3664-5p	0	0	0	0	0	0	0.832296	0	0	0	0	0	0	0	0	0	0	1.57236	0	0	0	0.666919	1.08271	0.56837	0	0	0	0	0	0	0	0	0	0	0	0	0	0	2.64044	0
hsa-miR-4724-5p	0	0	0	0	0	1.23697	0.832296	1.22083	0	0	1.7499	0	0.745261	0	1.39849	0	0	0	0	0	0.463121	0	0	0	1.26451	0	0.606794	0	0	0	0	0	1.45943	1.67781	0	0	0	0	0	1.6875
hsa-miR-1243	0	0	0	0	0	0	0	0	0	3.00986	0	0	0	0	0	0	0	0	0	0	0	0.666919	0	0	0	0	0	0	0	0	0	0	0	0	0	0	0	0	0	0
hsa-miR-193a-3p	0	0	0	0	0	0.618487	0	0	0	0	0	0	0	0	0	4.20426	0	0	0.7738	0	0	0	0	0	0.632256	0	0	0	0	0	0	0	1.45943	0	0	0	0	0	0	0
hsa-miR-5197-3p	0	0	0	0	0	0	0	0	0	0	0	0	0	0	0	0	0	0	0	0	0	0	0	0	0	0	0	0	0	0	0	0	0	0	0	0	0	0	0	0
hsa-miR-483-5p	0	0	2.23106	0	0	1.85546	3.32918	1.22083	5.63661	0	3.4998	0	8.19787	0	8.39096	0	1.50113	0	1.5476	1.05629	0	1.33384	0	0	6.32256	0	0.910191	1.09659	4.60635	0	0	0	0	0	0	1.65598	0	0	0	0
hsa-miR-4499	0	0	0	0	0	0	0	0	0	0	0	0	0	0	0	0	0	0	0	0	0	0	0	0	0	0	0	0	0	0	0	0	0	0	0	0	0	0	0	0
hsa-miR-3925-5p	0	0	0	0	0	0	0.832296	0	0	0	0	0	0.745261	0	0	0	0	0	0	0	0	0	0	0	0	0	0	0	1.15159	0	0	0	0	0	0	0	0	0	0	0
hsa-miR-6856-5p	0	0	0	0	0	0	0	0	0	0	0	0	0	0	0	0	0	0	0	0	0	0	0	0	0	0	0	0	0	0	0	0	0	0	0	0	0	0	0	0
hsa-miR-3916	0	0	0	0	0	0	0	0	0	0	0	0	0	0	0	0	0	0	0	0	0	0	0	0	0	0	0	0	0	0	0	0	0	0	0	0	0	0	0	0
hsa-miR-576-3p	0	1.34682	2.23106	4.99448	0	0	2.49689	0	0.939436	1.50493	0	0	0	0	2.79699	0	1.50113	1.57236	0.7738	1.05629	0.926242	1.33384	1.08271	1.70511	1.89677	0.672989	2.12378	5.48295	0	1.26397	0	0	1.45943	0	2.06775	3.31196	2.44944	0	0	1.6875
hsa-miR-3942-5p	0	0	2.23106	0	0	1.85546	0	1.22083	0	1.50493	0	0	0	0	0	4.20426	0.750564	1.57236	1.5476	0	0.463121	0	1.08271	0.56837	0	2.01897	0.303397	0	0	1.26397	0	6.56071	0	0	0	0	0	2.39466	0	0
hsa-miR-6838-5p	0	0	0	0	0	0	0	0	0	0	0	0	0	0	0	0	0	0	0	0	0	0	0	0	0	0	0	0	0	1.26397	0	0	0	0	0	0	0	0	0	0
hsa-miR-646	0	0	0	0	0	0	0	0	0	0	0	0	0	0	0	0	0	0	0	0	0	0	0	0	0	0	0	0	0	0	0	0	0	0	0	0	0	0	0	0
hsa-miR-6779-3p	0	0	0	0	0	0	0	0	0	0	0	0	0	0	0	0	0	0	0	0	0	0	0	0	0	0	0	0	0	0	0	0	0	0	0	0	0	0	0	0
hsa-miR-129-2-3p	0	0	0	0	0	0	0.832296	0	0	0	0	0	0	0	0	0	0.750564	0	0	0	0	1.33384	0	0	0	0	0	0	0	0	0	0	0	0	0	0	0	0	0	0
hsa-miR-129-1-3p	0	0	0	2.49724	1.45896	0	0.832296	0	0	1.50493	0	0	0.745261	0	0	4.20426	0	0	0	0	1.38936	3.33459	1.08271	0	0.632256	0	1.21359	2.19318	1.15159	0	0	0	0	1.67781	6.20324	0	1.22472	2.39466	0	1.6875
hsa-miR-6819-3p	0	0	0	0	0	0	0	0	0	0	0	0	0	0	0	0	0	0	0	0	0.463121	0	0	0	0	0	0	0	0	0	0	0	0	0	0	0	0	0	0	0
hsa-miR-596	0	0	0	0	0	0	0	0	0	0	0	0	0	0	0	0	0	0	0	0	0	0	0	0	0	0	0	0	0	0	0	0	0	0	0	0	0	0	0	0
hsa-miR-4670-5p	0	0	0	0	0	0	0	0	0	0	0	0	0	0	0	0	0	0	0	0	0	0	0	0	0	0	0	0	0	0	0	0	0	0	0	0	0	0	0	0
hsa-miR-6854-5p	0	0	0	0	0.364741	0	0	0	0	0	0	0	0	0	0	0	0.750564	0	0	0	0	0	0	0	0.632256	0	0.303397	0	0	0	0	0	0	0	0	0	0	0	0	0
hsa-miR-208b-5p	0	0	0	0	0	0	0	0	0	0	0	0	0	0	0	0	0	0	0	0	0	0	0	0	0	0	0	0	0	0	0	0	0	0	0	0	0	0	0	0
hsa-miR-3914	0	0	0	0	0	0	0	0	0	0	0	0	0	0	0	0	0	0	0	0	0	0	0	0	0	0	0	0	0	0	0	0	0	0	0	0	0	0	0	0
hsa-miR-6888-5p	0	0	0	0	0	0	0	0	0	0	0	0	0	0	0	0	0	0	0	0	0	0	0	0	0	0	0	0	0	0	0	0	0	0	0	0	0	0	0	0
hsa-miR-4747-3p	0	0	0	0	0	0	0	0	0	0	0	0	0	0	0	0	0	0	0	0	0	0	0	0	0	0	0	0	0	0	0	0	0	0	0	0	0	0	0	0
hsa-miR-3142	0	0	0	0	0	0	0	0	0	0	0	0	0	0	0	0	0	0	0	0	0	0	0	0	0	0	0	0	0	0	0	0	0	0	0	0	0	0	0	0
hsa-miR-9500	0	0	0	0	0	0	0	0	0	0	0	0	0	0	0	0	0	0	0	0	0	0	0	0	0	0	0	0	0	0	0	0	0	0	0	0	0	0	0	0
hsa-miR-7845-5p	0	0	0	0	0	0	0	0	0.939436	0	0	0	0	0	0	0	0	0	0	0	0	0	0	0	0	0	0	0	0	0	0	0	0	0	0	0	0	0	0	0
hsa-miR-4739	0	0	0	0	0	0	0	0	0.939436	0	0	0	0	0	0	0	0	1.57236	0.7738	0	0	0	0	0	0	0	0	0	0	0	0	0	0	0	0	0	0	0	0	0
hsa-miR-3158-3p	0	0	0	0	0.364741	0	0.832296	0	0	3.00986	0	0	0	1.45455	0	0	0	0	0.7738	1.05629	0	1.33384	0	0	0.632256	0	1.51698	0	0	0	0	0	0	1.67781	2.06775	0	1.22472	2.39466	0	3.37499
hsa-miR-6743-5p	0	0	0	0	0	0	0	0	0	0	0	0	0	0	0	0	0	0	0	0	0	0	0	0	0	0	0	0	0	0	0	0	0	0	0	0	0	0	0	0
hsa-miR-6085	0	0	0	0	0	0	0	0	0	0	0	0	0	0	0	0	0	0	0	0	0	0	0	0	0	0	0	0	0	0	0	0	0	0	0	0	0	0	0	0
hsa-miR-4716-3p	0	0	2.23106	0	0.364741	0	0	0	0.939436	0	0	0	0	0	0	0	0	0	0	1.05629	0	0	0	0	0	0	0	1.09659	1.15159	0	0	0	0	0	0	0	0	0	0	0
hsa-miR-4678	0	0	0	0	0	0	0	0	0	0	0	0	0	0	0	0	0	0	0	0	0	0	0	0	0	0	0	0	0	0	0	0	0	0	0	0	0	0	0	0
hsa-miR-4464	0	0	0	0	0	0	0	0	0	0	0	0	0	0	0	0	0	0	0	0	0	0	0	0	0	0	0	0	0	0	0	0	0	0	0	0	0	0	0	0
hsa-miR-1244	0	0	0	0	0	0	0	0	0	0	0	0	0	0	0	0	0	0	0	0	0	0	0	0	0	0	0	0	0	0	0	0	0	0	0	0	0	0	0	0
hsa-miR-5588-3p	0	0	0	0	0	0	0	0	0	0	0	0	0	0	0	0	0	0	0	0	0	0	0	0	0	0	0	0	0	0	0	0	0	0	0	0	0	0	0	0
hsa-miR-6838-3p	0	0	0	0	0	0	0	0	0	0	0	0	0	0	0	0	0	0	0	0	0	0	0	0	0	0	0.303397	0	0	0	0	0	0	0	0	0	0	0	0	0
hsa-miR-1245a	0	0	0	0	0	0	0	0	0	0	0	0	0	0	0	0	0	0	0	0	0	0	0	0	0	0	0	0	0	0	0	0	0	0	0	0	0	0	0	0
hsa-miR-371b-3p	0	0	0	0	0	0	0	0	0	0	0	0	0	0	0	0	0	0	0	0	0	0	0	0	0	0	0	0	0	0	0	0	0	0	0	0	0	0	0	0
hsa-miR-371a-3p	0	0	0	0	0	0	0	0	0	0	0	0	0	0	0	0	0	0	0	0	0	0	0	0	0	0	0	0	0	0	0	0	0	0	0	0	0	0	0	0
hsa-miR-519e-3p	0	0	0	0	0	0	0	0	0	0	0	0	0	0	0	0	0	0	0	0	0	0	0	0	0	0	0	0	0	0	0	0	0	0	0	0	0	0	0	0
hsa-miR-512-3p	0	0	0	0	0	0	0	0	0	0	0	0	0	0	0	0	0	0	0	0	0	0	0	0	0	0	0	0	0	0	0	0	0	0	0	0	0	0	0	0
hsa-miR-520f-3p	0	0	0	0	0.364741	0	0	0	0	0	0	0	0	0	0	0	0	0	0	0	0	0	0	0	0	0	0	0	0	0	0	0	0	0	0	0	0	0	0	0
hsa-miR-648	0	0	0	0	0	0	0	0	0	0	0	0	0	0	0	0	0	0	0	0	0	0	0	0	0	0	0	0	0	0	0	0	0	0	0	0	0	0	0	0
hsa-miR-5590-3p	0	0	0	0	0	0	0	0	0	0	0	0	0	0	0	0	0.750564	0	0	0	0.463121	0	0	0	0	0	0	0	0	0	0	0	0	0	0	0	0	0	0	0
hsa-miR-5692b	0	0	0	0	0	0	0	0	0	0	0	0	0	0	0	0	0	0	0	0	0	0	0	0	0	0	0	0	0	0	0	0	0	0	0	0	0	0	0	0
hsa-miR-5692c	0	0	0	0	0	0	0	0	0	0	0	0	0	0	0	0	0	0	0	0	0	0	0	0	0	0	0	0	0	0	0	0	0	0	0	0	0	0	0	0
hsa-miR-7705	0	0	0	0	0.729481	0	0	0	0	4.51479	0	0	0.745261	0	1.39849	0	0	1.57236	0.7738	1.05629	0.463121	1.33384	0	0.56837	0.632256	0.672989	0.303397	0	0	1.26397	2.23593	0	1.45943	0	0	0	0	2.39466	2.64044	0
hsa-miR-1295b-3p	0	0	0	0	0	0	0	0	0	0	0	0	0	0	0	0	0.750564	0	0	0	0	0	0	0	0	0	0	0	0	0	0	0	0	0	0	0	0	0	0	0
hsa-miR-410-3p	0	0	0	0	0	0	0	0	0	0	0	0	0	0	0	0	0	0	0	0	0	0	0	0	0	0	0	0	0	0	0	0	0	0	0	0	0	0	0	0
hsa-miR-656-3p	0	0	0	0	0	0	0	0	0	0	0	0	0	0	0	0	0	0	0	1.05629	0.463121	0	0	0	0	0	0	0	0	0	0	0	1.45943	0	2.06775	0	0	0	0	0
hsa-miR-5094	0	0	0	0	0	0	0.832296	0	0	0	0	0	0	0	0	0	0	0	0	0	0	0	0	0	0	0	0.303397	0	0	0	0	0	0	0	0	0	0	0	0	0
hsa-miR-154-3p	0	0	0	0	0	0	0	0	0	0	0	0	0	0	0	0	0	0	0	0	0	0	0	0	0	0	0	0	0	0	0	0	0	0	0	0	0	0	0	0
hsa-miR-487a-3p	0	0	0	0	0	0	0	0	0	0	0	0	0	0	0	0	0	0	0	0	0.463121	0	0	0	0	0	0	0	0	0	0	0	0	0	0	0	0	0	0	0
hsa-miR-96-3p	0	0	0	0	0	0	0	0	0	0	0	0	0	0	0	0	0	0	0	0	0	0	0	0	0.632256	0	0	0	0	0	0	0	0	0	0	0	0	0	0	0
hsa-miR-5092	0	0	0	0	0	0	0	0	0	0	0	0	0	0	0	0	0	0	0	0	0	0	0	0	0	0	0	0	0	0	0	0	0	0	0	0	0	0	0	0
hsa-miR-4733-5p	0	1.34682	0	0	0	0	0.832296	1.22083	0.939436	0	0	0	0	1.45455	0	0	0	1.57236	0	0	0	0	1.08271	2.27348	0	0	0.606794	0	0	0	0	0	0	0	0	3.31196	0	0	0	0
hsa-miR-3200-5p	0	0	0	0	0.364741	0.618487	0	0	0	0	1.7499	0	0	0	1.39849	0	0.750564	0	0.7738	0	0.926242	0	1.08271	1.13674	0.632256	0.672989	0	0	0	0	0	0	0	0	0	1.65598	1.22472	0	0	1.6875
hsa-miR-4712-3p	0	0	0	0	0	0	0	0	0	0	0	0	0	0	0	0	0	0	0	0	0	0	0	0	0	0	0	0	0	0	0	0	0	0	0	0	0	0	0	0
hsa-miR-889-5p	0	0	0	0	0	0	0	0	0	0	0	0	0	0	0	0	0	0	0	0	0	0	0	0	0	0	0	0	0	0	0	0	0	0	0	0	0	0	0	0
hsa-miR-4495	0	0	0	0	0	0	0	0	0	0	0	0	0	0	0	0	0	0	0	0	0	0	0	0	0	0	0	0	0	0	0	0	0	0	0	0	0	0	0	0
hsa-miR-3668	0	0	0	0	0	0	0	0	0	0	0	0	0	0	0	0	0	0	0	0	0	0	0	0	0	0	0	0	0	0	0	0	0	0	0	0	0	0	0	0
hsa-miR-4657	0	0	0	0	0	0	0	0	0	0	0	0	0	0	0	0	0	1.57236	0	0	0	0	0	0	0	0	0	0	0	0	0	0	0	0	0	0	0	0	0	0
hsa-miR-4491	0	0	0	0	0	0	0	0	0	0	0	0	0	0	0	0	0	0	0	0	0	0	0	0	0	0	0	0	0	0	0	0	0	0	0	0	0	0	0	0
hsa-miR-511-3p	0	0	0	0	0	0	0	0	0	0	0	0	0	0	0	0	0	0	0	0	0	0	0	0	0	0	0	0	0	0	0	0	0	0	0	0	0	0	0	0
hsa-miR-4307	0	0	0	0	0	0	0	0	0	0	0	0	0	0	0	0	0	0	0	0	0	0	0	0	0	0	0	0	0	0	0	0	0	0	0	0	0	0	0	0
hsa-miR-3938	0	0	0	0	0	0	0.832296	0	0	0	1.7499	0	0	0	0	0	0	0	0	0	0	0.666919	0	0	0	0	0	0	0	0	0	0	0	0	0	0	0	0	0	0
hsa-miR-4778-5p	0	0	2.23106	0	0	0	0.832296	0	0	0	0	0	0	0	0	0	0.750564	0	0	0	0	0	0	0	0	0	0	0	0	0	0	0	0	0	0	0	0	0	0	0
hsa-miR-367-3p	0	0	0	0	0	0	0	0	0	0	0	0	0	0	0	0	0	0	0	0	0	0	0	0	0	0	0	0	0	0	0	0	0	0	0	0	0	0	0	0
hsa-miR-4699-3p	0	0	0	0	0.364741	0	0	0	0	0	0	0	0	0	0	0	0	0	0	0	0	0	0	0	0	0	0	0	0	0	0	0	0	0	0	0	0	0	0	0
hsa-miR-5002-5p	0	0	0	0	0	0	0	0	0	0	0	0	0	0	0	0	0	0	0	0	0	0	0	0	0	0	0	0	0	0	0	0	0	0	0	0	0	0	0	0
hsa-miR-3613-3p	0	0	2.23106	0	0.729481	0	0	0	0.939436	0	0	0	0	0	0	0	0	0	0.7738	0	2.3156	0	1.08271	0.56837	0.632256	0.672989	0.606794	0	2.30317	1.26397	2.23593	0	0	0	0	1.65598	1.22472	0	2.64044	0
hsa-miR-3973	0	0	0	0	0	0	0	0	0	0	0	0	0	0	0	0	0	0	0	0	0	0	0	0	0	0	0	0	0	0	0	0	0	0	0	0	0	0	0	0
hsa-miR-520h	0	0	0	0	0	0	0	0	0	0	0	0	0	0	0	0	0	0	0	0	0	0	0	0	0	0	0	0	0	0	0	0	0	0	0	0	0	0	0	0
hsa-miR-520g-3p	0	0	0	0	0	0	0	0	0	0	0	0	0	0	0	0	0	0	0	0	0	0	0	0	0	0	0	0	0	0	0	0	0	0	0	0	0	0	0	0
hsa-miR-4761-5p	0	0	0	0	0	0	0	0	0	0	0	0	0	0	0	0	0	0	0	0	0	0	0	0	0	0	0	0	0	0	0	0	0	0	0	0	0	0	0	0
hsa-miR-216b-3p	0	0	0	0	0.364741	0	0	0	0	0	0	0	0	1.45455	0	4.20426	0	0	0.7738	1.05629	2.77872	0	0	0	0.632256	0	0	0	0	1.26397	0	0	0	0	0	0	0	0	0	0
hsa-miR-3681-3p	0	0	0	0	0	0	0	0	0	0	0	0	0	0	0	0	0	0	0	0	0	0	0	0	0	0	0	0	0	0	0	0	0	0	0	0	0	0	0	0
hsa-miR-4717-3p	0	0	0	0	0.364741	0	0	0	0	0	1.7499	9.05067	0	0	0	0	0	0	0	0	0	0.666919	0	1.13674	1.26451	0	0.303397	1.09659	0	0	0	0	0	0	0	0	1.22472	0	0	0
hsa-miR-6865-3p	0	0	0	0	0	0	0	0	0	0	0	0	0	0	0	0	0	0	0	0	0	0	0	0	0	0	0	0	0	0	0	0	0	0	0	0	0	0	2.64044	0
hsa-miR-6760-3p	0	0	0	0	0	0	0	0	0	0	0	0	0	1.45455	0	0	0	0	0	0	0.463121	0	0	0.56837	0	0.672989	0	0	0	0	0	0	0	0	0	0	0	0	0	0
hsa-miR-499b-5p	0	0	0	0	0	0	0	0	0	0	0	0	0	0	0	0	0	0	0	0	0	1.33384	0	0	0	0	0	0	0	0	0	0	0	0	0	0	0	0	0	0
hsa-miR-6847-5p	0	0	0	0	0.729481	1.23697	0	0	0.939436	0	0	0	0	0	0	0	1.50113	0	0.7738	0	0.926242	0.666919	0	0	1.26451	0.672989	0	1.09659	1.15159	0	0	0	0	0	0	0	0	0	0	1.6875
hsa-miR-383-3p	0	0	0	0	0	0	0	0	0	0	0	0	0	0	0	0	0	0	0	0	0	0	0	0	0	0	0	0	0	0	0	0	0	0	0	0	0	0	0	0
hsa-miR-214-3p	0	1.34682	0	0	0	0	0	0	0	0	0	0	0	0	0	0	0	0	0	0	0	0.666919	0	0	0	0.672989	0	0	0	0	0	0	0	1.67781	0	0	0	0	0	0
hsa-miR-5685	0	0	0	0	0	0	0	0	0	0	0	0	0	0	0	0	0	0	0	0	0	0	0	0	0	0	0	0	0	0	0	0	0	0	0	0	0	0	0	0
hsa-miR-4433a-3p	0	0	0	0	0	0.618487	0	0	0	0	0	0	0	0	0	0	0	0	0	0	0	0	0	0	0	0	0	0	0	0	0	0	0	0	0	0	0	0	0	0
hsa-miR-6715b-5p	0	0	0	0	0	0	0	0	0	0	0	0	0	0	0	0	0	0	0	0	0	0	0	0	0	0	0	0	0	0	0	0	0	0	0	0	0	0	0	0
hsa-miR-4514	0	0	0	0	0	0	0	0	0	0	0	0	0	0	0	0	0	0	0	0	0	0	0	0	0	0	0	0	0	0	0	0	0	0	0	0	0	0	0	0
hsa-miR-4441	0	0	0	0	0	0	0	0	0	0	0	0	0	0	0	0	0	0	0	0	0	0	0	0	0	0	0	0	0	0	0	0	0	0	0	0	0	0	0	0
hsa-miR-3918	0	0	0	0	0	0	0	0	0	0	0	0	0	0	0	0	0	0	0	0	0	0	0	0	0	0	0	0	0	0	0	0	0	0	0	0	0	0	0	0
hsa-miR-9900	0	0	0	0	0	0	0	0	0	0	0	0	0	0	0	0	0	0	0	0	0	0	0	0	0	0	0	0	0	0	0	0	0	0	0	0	0	0	0	0
hsa-miR-936	0	0	0	0	0	0	0	0	0	0	0	0	0	0	0	0	0	0	0	0	0	0	0	0	0	0	0	0	0	0	0	0	0	0	0	0	0	0	0	0
hsa-miR-622	0	0	0	0	0	0	0	0	0	0	0	0	0	0	0	0	0	0	0	0	0	0	0	0	0	0	0	0	0	0	0	0	0	0	0	0	0	0	0	0
hsa-miR-1-5p	0	0	0	0	0	0	0	0	0	0	0	0	0	0	0	0	0	0	0	0	0	0	0	0	0	0	0	0	0	0	0	0	0	0	0	0	0	0	0	0
hsa-miR-4793-5p	0	0	0	0	0	0	0	0	0	0	0	0	0	0	0	0	0	0	0	0	0	0	0	0	0	0	0	0	0	0	0	0	0	0	0	0	0	0	0	0
hsa-miR-6785-3p	0	1.34682	2.23106	0	0	0	0	0	0	0	0	0	0	0	0	0	0	0	0.7738	0	0	0	0	0	0	0	0.303397	0	0	0	0	0	0	0	0	0	0	0	0	0
hsa-miR-4317	0	0	0	0	0	0	0	0	0	0	0	0	0	0	0	0	0	0	0	0	0	0	0	0	0	0	0	0	0	0	0	0	0	0	0	0	0	0	0	0
hsa-miR-1250-3p	0	0	0	0	0	0	0	0	0	0	0	0	0	0	0	0	0	0	0	0	0	0	0	0	0	0	0	0	0	0	0	0	0	0	0	0	0	0	0	0
hsa-miR-3691-3p	0	0	0	0	0	0	0	0	0	0	1.7499	0	0	0	1.39849	0	0	0	0	0	0	0.666919	0	0	0	0	0	0	0	1.26397	0	0	0	0	0	0	0	0	0	0
hsa-miR-6849-3p	0	0	0	0	0	1.23697	0.832296	1.22083	0	0	0	0	0	0	0	0	0	0	0	0	0	0	0	0.56837	0	0	0	0	0	0	2.23593	0	0	0	0	0	0	0	0	0
hsa-miR-4738-5p	0	0	0	0	0	0	0	0	0	0	0	0	0	0	0	0	0	0	0	0	0	0	0	0	0	0	0	0	0	0	0	0	0	0	0	0	0	0	0	0
hsa-miR-665	0	0	0	0	0	0	0	0	0	0	0	0	0	0	0	0	0.750564	0	0	0	0	0	0	0	0	0	0	0	0	0	0	0	0	0	0	0	0	0	0	0
hsa-miR-4645-5p	0	0	0	0	0	0	0	0	0	0	0	0	0	0	0	0	0	0	0	0	0	0	0	0	0	0	0	0	0	0	0	0	0	0	0	0	0	0	0	0
hsa-miR-6837-5p	0	0	0	0	0	0	0	0	0	0	0	0	0	0	0	0	0	0	0	0	0	0	0	0	0	0	0	0	0	0	0	0	0	0	0	0	0	0	0	0
hsa-miR-4726-3p	0	0	0	0	0	0	0	0	0	0	0	0	0	1.45455	0	0	0	0	0	0	0	0	0	0	0	0	0	0	0	0	0	0	0	0	0	0	0	0	0	0
hsa-miR-6840-5p	0	0	0	0	0	0	0	0	0.939436	0	0	0	0	0	0	0	0	0	0	0	0	0	0	0	0	0	0	0	0	0	0	0	0	0	0	0	0	0	0	0
hsa-miR-6795-3p	0	0	0	0	0.729481	0	0	0	0	0	1.7499	0	0	1.45455	0	0	0	0	0	0	0	0	0	0	0	0	0.303397	0	1.15159	0	2.23593	3.28035	0	0	0	0	0	0	0	0
hsa-miR-6801-3p	0	0	0	0	0	0	0	0	0	0	0	0	0	0	0	0	0	0	0	0	0	0	0	0	0	0.672989	0	0	0	0	0	0	0	0	0	0	0	0	0	0
hsa-miR-7108-3p	0	0	0	0	0	0	0	0	0	0	0	0	0	0	0	0	0	0	0	0	0	0	0	0	0	0	0	0	0	0	0	0	0	0	0	0	0	0	2.64044	0
hsa-miR-454-5p	0	2.69364	2.23106	4.99448	6.20059	4.32941	5.82607	1.22083	9.39436	4.51479	5.2497	18.1013	5.21683	8.72731	1.39849	12.6128	3.75282	7.86179	10.0594	3.16886	6.02057	4.00151	3.24814	3.41022	1.89677	4.71092	4.24756	5.48295	4.60635	13.9037	4.47186	3.28035	1.45943	3.35563	6.20324	1.65598	7.34833	0	15.8426	10.125
hsa-miR-4655-3p	0	0	0	0	0	0	0	0	0	0	0	0	0	0	0	0	0	0	0	0	0	0	0	0	0	0	0	0	0	0	0	0	0	0	0	0	0	0	0	0
hsa-miR-4780	0	0	0	0	0	0	0	0	0	0	0	0	0	0	0	0	0	0	0	0	0	0	0	0	0	0	0	0	0	0	0	0	0	0	0	0	0	0	0	0
hsa-miR-6832-3p	0	0	0	0	0	0	0	0	0.939436	0	0	0	0	0	1.39849	0	0.750564	0	0	0	0	0	0	0	0	0	0	0	0	0	0	0	0	0	2.06775	0	0	0	0	0
hsa-miR-4671-5p	0	0	0	0	0	0.618487	0	0	0	0	0	0	0	1.45455	1.39849	0	0	0	0.7738	0	0	0	0	0	0	0	0	0	0	0	0	0	0	0	0	0	0	0	0	0
hsa-miR-4485-5p	0	0	0	0	0	0	0	0	0	0	0	0	0	0	0	0	0	0	0	0	0	0	0	0	0	0	0	0	0	0	0	0	0	0	0	0	0	0	0	0
hsa-miR-6827-3p	0	1.34682	2.23106	4.99448	1.8237	1.85546	0.832296	2.44166	2.81831	1.50493	1.7499	0	1.49052	0	0	0	1.50113	1.57236	3.869	1.05629	0.926242	2.00076	2.16543	2.84185	0.632256	0	1.21359	0	0	0	4.47186	3.28035	0	3.35563	2.06775	1.65598	1.22472	2.39466	0	0
hsa-miR-1973	0	0	0	0	0	0	0	0	0	0	0	0	0	0	0	0	0	0	0	0	0	0	0	0	0	0	0	0	0	0	0	0	0	0	0	0	0	0	0	0
hsa-miR-3140-5p	0	0	0	0	0	0	0	0	0	0	0	0	0	0	0	0	0	0	0	0	0	0	0	0	0	0	0	0	0	0	0	0	0	0	0	0	0	0	0	0
hsa-miR-544b	0	0	0	0	0	0	0	0	0	0	0	0	0	0	0	0	0	0	0	0	0.463121	0	0	0	0	0	0	0	0	0	0	0	0	1.67781	0	0	0	0	0	0
hsa-miR-4722-3p	0	0	0	0	0	0	0	0	0	0	0	0	0	0	0	0	0	0	0	0	0	0	0	0	0	0	0	0	0	0	0	3.28035	0	0	0	0	0	0	0	0
hsa-miR-3690	0	0	0	0	0	0	0	0	0	0	0	0	0	0	0	0	0	0	0	0	0	0	0	0	0	0	0	0	0	0	0	0	0	0	0	0	0	0	0	0
hsa-miR-8073	0	0	0	0	0	0	0	0	0	0	0	0	0	0	0	0	0	0	0	0	0	0	0	0	0	0	0	0	0	0	0	0	0	0	0	0	0	0	0	0
hsa-miR-6742-3p	0	0	2.23106	2.49724	0	0.618487	0	1.22083	0	0	0	0	0	0	0	0	0	0	0	0	0.463121	0	0	0	0	0	0	0	0	1.26397	2.23593	0	0	0	0	0	0	0	0	0
hsa-miR-4421	0	8.08092	0	0	1.45896	1.23697	0.832296	1.22083	0.939436	0	1.7499	0	0	2.9091	1.39849	0	2.25169	0	0	0	2.3156	3.33459	0	0	1.89677	0.672989	0.606794	0	0	1.26397	2.23593	0	0	0	0	0	2.44944	0	2.64044	0
hsa-miR-3667-3p	0	0	0	0	0	0	0	0	0	0	0	0	0	0	0	0	0	0	0	0	0	0	0	0	0	0	0	0	0	0	0	0	0	0	0	0	0	0	0	0
hsa-miR-1248	0	0	0	0	0	0	0	0	0	0	0	0	0	0	0	0	0	0	0	0	0	0	0	0	0	0	0	0	0	0	0	0	0	0	0	0	0	0	0	0
hsa-miR-6841-3p	0	0	0	0	0	0	0	0	0	0	0	0	0	0	0	0	0	0	0	0	0	0	0	0	0	0	0	0	0	0	0	0	0	0	0	0	0	0	0	0
hsa-miR-1915-5p	0	1.34682	0	2.49724	0	0	0	0	0	0	0	0	0	0	0	0	0	0	0	0	0	0	0	0.56837	0	0	0	0	0	0	0	0	0	0	0	0	0	0	0	0
hsa-miR-212-5p	0	1.34682	0	0	0	0	0	0	0	0	0	0	0	0	0	0	0	0	0	0	0.463121	0	0	0.56837	0	0	0	0	0	0	0	0	0	0	0	0	0	0	0	0
hsa-miR-1249-3p	0	0	0	0	0	0.618487	0	0	0	3.00986	0	0	0	0	0	0	0	0	0	1.05629	0	1.33384	0	0	0.632256	0	0.303397	0	0	0	0	3.28035	0	0	0	0	0	0	0	0
hsa-miR-5091	0	0	0	0	0	0	0	0	0	0	0	0	0	0	0	0	0	0	0	0	0	0	0	0	0	0	0	0	0	0	0	0	0	0	0	0	0	0	0	0
hsa-miR-105-3p	0	0	0	0	0	0	0	0	0	0	0	0	0	0	0	0	0.750564	0	0	0	0	0	0	0	0	0	0	0	0	0	0	0	0	0	0	0	0	0	0	0
hsa-miR-6075	0	0	0	0	0	0	0	0	0	0	0	0	0	0	0	0	0	0	0	0	0	0	0	0	0	0	0	0	0	0	0	0	0	0	0	0	0	0	0	0
hsa-miR-7112-5p	0	0	0	0	0	0	0	0	0	0	0	0	0	0	0	0	0	0	0	0	0	0	0	0	0	0	0	0	0	0	0	0	0	0	0	0	0	0	0	0
hsa-miR-6777-5p	0	0	0	0	0.364741	0.618487	0.832296	0	0.939436	0	0	0	0.745261	0	2.79699	0	1.50113	1.57236	0	4.22514	0	1.33384	0	0	0.632256	0	1.21359	1.09659	1.15159	0	2.23593	3.28035	0	0	0	1.65598	0	0	0	0
hsa-miR-137-5p	0	0	0	0	0	0	0	0	0	0	0	0	0	0	0	0	0	0	0	0	0	0	0	0	0	0	0	0	0	0	0	0	0	0	0	0	0	0	0	0
hsa-miR-1250-5p	0	0	0	0	0	0	1.66459	1.22083	0.939436	1.50493	0	0	0	0	0	0	1.50113	0	0.7738	0	0.926242	0	0	0.56837	0	0	0.910191	0	1.15159	0	0	0	0	0	2.06775	1.65598	2.44944	0	0	0
hsa-miR-1306-3p	0	0	0	0	0	0	0	0	0	3.00986	0	0	0	0	0	0	0	0	0.7738	0	0.463121	0.666919	1.08271	0	0.632256	0	0.303397	0	0	1.26397	0	0	0	0	0	3.31196	0	0	0	0
hsa-miR-5707	0	0	0	0	0	0	0	0	0	0	0	0	0	0	0	0	0	0	0	0	0	0	0	0	0	0	0	0	0	0	0	0	0	0	0	0	0	0	0	0
hsa-miR-4509	0	0	0	0	0	0	0	0	0	0	0	0	0	0	0	0	0	0	0	0	0	0	0	0	0	0	0	0	0	0	0	0	0	0	0	0	0	0	0	0
hsa-miR-190b-3p	0	0	0	0	0	0	0	0	0	0	0	0	0	0	0	0	0	0	0	0	0	0	0	0	0	0	0	0	0	0	0	0	0	0	0	0	0	0	0	0
hsa-miR-616-5p	0	0	0	0	0.729481	0	0	0	0	0	0	0	0	0	0	0	0	0	0.7738	0	0	0	1.08271	0.56837	0	0	0.606794	0	0	0	0	0	0	0	0	0	0	0	0	0
hsa-miR-371b-5p	0	0	0	0	0	0	0	0	0	0	0	0	0	0	0	0	0	0	0	0	0	0	0	0	0	0	0	0	0	0	0	0	0	0	0	0	0	0	0	0
hsa-miR-373-5p	0	0	0	0	0	0	0	0	0	0	0	0	0	0	0	0	0	0	0	0	0	0	0	0	0	0	0	0	0	0	0	0	0	0	0	0	0	0	0	0
hsa-miR-371a-5p	0	0	0	0	0	0	0	0	0	0	0	0	0	0	1.39849	0	0	0	0	0	0	0	0	0	0	0	0	0	0	0	0	0	0	0	0	0	0	0	0	0
hsa-miR-4264	0	0	0	0	0	0	0	0	0	0	0	0	0	0	0	0	0	0	0	0	0	0	0	0	0	0	0	0	0	0	0	0	0	0	0	0	0	0	0	0
hsa-miR-6758-3p	0	1.34682	0	0	0	0.618487	0	0	0	0	0	0	0	0	0	0	0	0	0	0	0.463121	0	0	0	0	0	0.303397	0	0	0	0	0	0	1.67781	0	0	0	0	0	0
hsa-miR-5695	0	0	0	0	0	0	0.832296	0	0.939436	0	0	0	0	0	0	0	0	0	0	0	0.926242	0	0	1.13674	0	0	0	0	0	0	0	0	0	1.67781	0	0	0	0	0	0
hsa-miR-3925-3p	0	0	0	0	0	0	0	0	0	0	0	0	0	0	0	0	0	0	0	0	0	0	0	0	0	0	0	0	0	0	0	0	0	0	0	0	0	0	0	0
hsa-miR-6814-3p	0	0	0	0	0	0	0.832296	1.22083	0	0	1.7499	0	0	0	0	0	1.50113	3.14472	0	0	0.463121	0.666919	0	0	0	0	0.303397	1.09659	0	0	0	0	0	1.67781	0	3.31196	0	0	2.64044	0
hsa-miR-4638-5p	0	1.34682	0	0	0	0	0	0	0.939436	0	0	0	0	0	0	0	0	0	0	1.05629	0	0.666919	0	0.56837	0	0	0	0	0	0	0	0	0	0	0	1.65598	0	0	0	0
hsa-miR-5187-3p	0	0	0	0	0.364741	0	0.832296	0	0	0	0	0	0.745261	0	0	0	0.750564	0	0	0	0	0	0	0	0	0	0	0	0	1.26397	0	0	0	0	0	0	0	0	0	0
hsa-miR-3660	0	0	0	0	0	0	0	0	0	0	0	0	0	0	0	0	0	0	0	0	0	0	0	0	0	0	0	0	0	0	0	0	0	0	0	0	0	0	0	0
hsa-miR-6751-3p	0	0	0	0	0	0	0	0	0.939436	0	0	0	0	0	0	0	0	0	0	0	0	0	0	0	0	0	0	0	0	0	0	0	1.45943	0	0	0	0	0	0	0
hsa-miR-3920	0	0	0	0	0	0	0	0	0	0	0	0	0	0	0	0	0	0	0	0	0	0	0	0	0	0	0	0	0	0	0	0	0	0	0	0	0	0	0	0
hsa-miR-18a-3p	0	2.69364	4.46212	0	1.8237	3.71092	2.49689	1.22083	3.75774	4.51479	0	0	1.49052	0	0	0	0.750564	0	0.7738	0	0.926242	2.00076	2.16543	1.70511	0	1.34598	4.85435	0	3.45476	2.52794	2.23593	3.28035	0	0	0	4.96794	1.22472	0	0	1.6875
hsa-miR-6128	0	0	0	0	0	0	0	0	0	0	0	0	0	0	0	0	0	0	0	0	0	0	0	0	0	0	0	0	0	0	0	0	0	0	0	0	0	0	0	0
hsa-miR-378b	0	0	0	0	0	0	0	0	0	0	0	0	0	0	0	0	0	0	0	0	0	0	0	0	0	0	0	0	1.15159	0	0	0	0	0	0	0	0	0	0	0
hsa-miR-378e	0	0	0	0	0.729481	0	0	2.44166	0	1.50493	0	0	1.49052	1.45455	0	0	0	3.14472	0	0	0.463121	1.33384	0	0.56837	0.632256	0	1.21359	0	0	1.26397	0	0	0	0	0	0	1.22472	0	0	0
hsa-miR-378h	0	0	0	0	1.09422	1.23697	0	0	0	0	0	0	0.745261	0	0	0	0.750564	0	1.5476	0	0	0	1.08271	0	0.632256	0.672989	0.303397	0	0	1.26397	0	3.28035	1.45943	0	0	0	0	0	0	0
hsa-miR-378j	0	0	0	0	0	0	0	0	0	0	0	0	0	0	0	0	0	0	0	0	0	0	0	0	0	0	0	0	0	0	0	0	0	0	0	0	0	0	0	0
hsa-miR-6868-5p	0	0	0	0	0	0	0	0	0	0	0	0	0	0	0	0	0	0	0	0	0	0	0	0	0	0	0	0	0	0	0	0	0	0	0	0	0	0	0	0
hsa-miR-4799-3p	0	0	0	0	0	0	0	0	0	0	0	0	0	0	0	0	0	0	0	0	0	0	0	0	0	0	0	0	0	0	0	0	0	0	0	0	0	0	0	0
hsa-miR-5588-5p	0	0	0	2.49724	0	0	0	0	0	1.50493	0	0	0	0	0	0	0	1.57236	0.7738	0	0.463121	0	0	0	0.632256	0	0.910191	1.09659	0	0	0	0	0	0	0	3.31196	0	0	0	0
hsa-miR-4646-5p	0	0	0	0	0	0	0	0	0	0	0	0	0	0	0	0	0	0	0	0	0	0	0	0	0	0	0	0	0	0	0	0	0	0	0	0	0	0	0	0
hsa-miR-6506-5p	0	1.34682	0	0	0	0	0	0	0.939436	0	0	0	0	1.45455	0	0	0	0	0	0	0	0	0	0	0.632256	0	0.303397	0	0	2.52794	0	0	1.45943	0	0	0	0	0	0	0
hsa-miR-6860	0	0	0	0	0	0	0	0	0	0	0	0	0	0	0	0	0	0	0	0	0	0	0	0	0	0	0	0	0	1.26397	0	0	0	0	0	0	0	0	0	0
hsa-miR-378g	0	0	2.23106	0	1.09422	0	0	2.44166	0.939436	1.50493	1.7499	0	0.745261	1.45455	0	0	0	3.14472	0	1.05629	1.38936	0	1.08271	1.13674	0	0	2.12378	0	0	3.79191	0	0	4.3783	5.03344	0	1.65598	0	0	2.64044	0
hsa-miR-4667-5p	0	0	0	0	0	0	0.832296	0	0	0	0	0	0	0	0	0	0	0	0	0	0	0	0	0	0	0	0	0	0	0	0	0	1.45943	0	0	0	0	0	0	0
hsa-miR-637	0	0	0	0	0	0	0	0	0	0	0	0	0	0	0	0	0	0	0	0	0	0	0	0	0	0	0	0	0	0	0	0	0	0	0	0	0	0	0	0
hsa-miR-6861-5p	0	0	0	0	0	0	0	1.22083	0	0	0	0	0	0	0	0	0	0	0	0	0	0	0	0	0	0	0	0	0	0	0	0	0	0	0	0	0	0	0	0
hsa-miR-20b-3p	0	0	0	0	0.364741	0	0	0	0.939436	0	0	0	0	0	0	0	0	0	0	0	0.926242	0.666919	0	0	0.632256	1.34598	0.303397	0	1.15159	0	0	0	0	0	0	0	0	0	0	0
hsa-miR-6773-3p	0	0	0	0	0	0	0	0	0	0	0	0	0	0	0	0	0	0	0	0	0	0	0	0	0	0	0	0	0	0	0	0	0	0	0	0	0	0	0	0
hsa-miR-367-5p	0	0	0	0	0	0	0	0	0	0	0	0	0	0	0	0	0	0	0	0	0	0	0	0	0	0	0	0	0	0	0	0	0	0	0	0	0	0	0	0
hsa-miR-302a-5p	0	0	0	0	0	0	0	0	0	0	0	0	0	0	0	0	0	0	0	0	0	0	0	0	0	0	0	0	0	0	0	0	0	0	0	0	0	0	0	0
hsa-miR-600	0	0	0	0	0	0	0	0	0	0	0	0	0	0	0	0	0	0	0	0	0	0	0	0	0	0	0	0	0	0	0	0	0	0	0	0	0	0	0	0
hsa-miR-412-3p	0	0	0	0	0	0	0	0	0	0	0	0	0	0	0	0	0	0	0	0	0	0	0	0	0	0	0	0	0	0	0	0	0	0	0	0	0	0	0	0
hsa-miR-635	0	0	0	0	0	0	0	0	0	0	0	0	0	0	0	0	0	0	0	0	0	0	0	0	0	0	0	0	0	0	0	0	0	0	0	0	0	0	0	0
hsa-miR-6774-5p	0	0	0	0	0	0	0	0	0	0	0	0	0	0	0	0	0	0	0	0	0	0	0	0	0	0	0	0	0	0	0	0	0	0	0	0	0	0	0	0
hsa-miR-302b-5p	0	0	0	0	0	0	0	0	0	0	0	0	0	0	0	0	0	0	0	0	0	0	0	0	0	0	0	0	0	0	0	0	0	0	0	0	0	0	0	0
hsa-miR-302d-5p	0	0	0	0	0	0	0	0	0	0	0	0	0	0	0	0	0	0	0	0	0	0	0	0	0	0	0	0	0	0	0	0	0	0	0	0	0	0	0	0
hsa-miR-3124-3p	0	0	0	0	0	0	0	0	0	0	0	0	0	0	0	0	0	0	0	0	0	0	0	0	0	0	0	0	0	0	0	0	0	0	0	0	0	0	0	0
hsa-miR-5681a	0	0	0	0	0	0	0	0	0	0	0	0	0	0	0	0	0	0	0	0	0	0.666919	0	0	0	0	0	0	0	0	0	0	0	0	0	0	0	0	0	0
hsa-miR-6730-5p	0	0	4.46212	0	0.729481	0	0	0	0.939436	3.00986	0	0	3.7263	1.45455	2.79699	0	0	0	0	0	0.926242	1.33384	1.08271	1.13674	0.632256	2.01897	1.51698	0	0	0	8.94373	0	0	3.35563	0	1.65598	2.44944	2.39466	2.64044	0
hsa-miR-4680-5p	0	0	0	0	0	0	0	0	0	0	0	0	0	0	0	0	0	0	0	0	0	0	0	0	0	0	0	0	0	0	0	0	0	0	0	0	0	0	0	0
hsa-miR-3185	0	1.34682	0	0	0	0	0	0	0	0	0	0	0	0	0	0	0	0	0	0	0	0	0	0	0	0	0	0	0	0	0	0	0	0	0	0	0	0	0	0
hsa-miR-10522-5p	0	0	0	0	0	0	0	0	0	0	0	0	0	0	0	0	0	0	0	0	0	0	0	0	0	0	0	0	0	0	0	0	0	0	0	0	0	0	0	0
hsa-miR-4699-5p	0	0	0	0	0	0	0	1.22083	0	0	0	0	0	0	0	0	0	0	0	0	0	0	0	0	0	0	0	0	0	0	0	0	0	0	0	0	0	0	0	0
hsa-miR-1252-5p	0	0	0	0	0	0	0	0	0	0	0	0	0	0	0	0	0	0	0.7738	0	0	0	0	0	0	0	0	0	0	0	0	0	0	0	0	0	0	0	0	0
hsa-miR-605-3p	0	0	0	0	0	0	0	0	0	0	0	0	0	0	0	0	0	0	0	0	0	0	0	0	0	0	0	0	0	0	0	0	0	0	0	0	0	0	0	0
hsa-miR-4493	0	0	0	0	0	0	0	0	0	0	0	0	0	0	0	0	0	0	0	0	0	0	0	0	0	0	0	0	0	0	0	0	0	0	0	0	0	0	0	0
hsa-miR-7515	0	0	0	0	0	0	0	0	0	0	0	0	0	0	0	0	0	0	0	0	0	0	0	0	0	0	0	0	0	0	0	0	0	0	0	0	0	0	0	0
hsa-miR-3179	0	0	0	0	0	0	0	0	0	0	0	0	0	0	1.39849	0	0	0	0	0	0.463121	0	0	0	0	0.672989	0.303397	0	1.15159	0	0	0	1.45943	0	0	0	0	0	0	0
hsa-miR-548ao-5p	0	0	0	0	0	0	0	0	0	0	0	0	0	0	0	0	0	0	0	0	0	0	0	0	0	0	0	0	0	0	0	0	0	0	0	0	0	0	0	0
hsa-miR-4795-5p	0	0	0	0	0	0	0	0	0	0	0	0	0	0	0	0	0	0	0	0	0	0	0	0	0	0	0	0	0	0	0	0	0	0	0	0	0	0	0	0
hsa-miR-10393-5p	0	0	0	0	0	0	0	0	0	0	0	0	0	0	0	0	0	0	0	0	0	0	0	0	0	0	0	0	0	0	0	0	0	0	0	0	0	0	0	0
hsa-miR-219b-3p	0	0	0	0	0	0	0	0	0	1.50493	0	0	0	0	0	0	0	0	0	0	0	0	0	0.56837	0	0	0	0	0	0	0	0	0	0	0	0	0	0	0	0
hsa-miR-219a-2-3p	0	0	0	0	0	0	0	0	0	0	0	0	0	0	0	0	0	0	0	0	0	0	0	0	0	0	0	0	0	0	0	0	0	0	0	0	0	0	0	0
hsa-miR-642b-3p	0	0	0	0	0	0	0	0	0	0	0	0	1.49052	0	0	0	0	0	0	0	0	0	1.08271	0	0	0	0.303397	0	0	0	0	0	0	0	0	0	0	0	0	0
hsa-miR-3117-5p	0	0	0	0	0	0	0	0	0	0	0	0	0	0	0	0	0	0	0	0	0	0	0	1.13674	0	0	0	0	0	0	0	0	0	0	0	0	0	0	0	0
hsa-miR-4645-3p	0	0	4.46212	0	0	0.618487	0.832296	0	0.939436	0	0	0	0	0	0	0	0	0	0	1.05629	0	0	0	0.56837	0	0	0.606794	1.09659	1.15159	0	0	3.28035	0	0	0	0	0	0	2.64044	0
hsa-miR-3913-3p	0	1.34682	2.23106	2.49724	0.364741	0	0.832296	0	0	0	0	0	0	1.45455	4.19548	0	0.750564	3.14472	0.7738	0	0.926242	1.33384	2.16543	0	0.632256	0.672989	0.606794	0	0	0	0	0	0	0	2.06775	0	0	2.39466	0	1.6875
hsa-miR-591	0	0	0	0	0	0	0	0	0	0	0	0	0	0	0	0	0	0	0	0	0	0	0	0	0	0	0	0	0	0	0	0	0	0	0	0	0	0	0	0
hsa-miR-4725-5p	0	0	0	0	0	0	0	0	0	0	0	0	0	0	0	0	0	0	0	0	0	0	0	0	0	0	0	0	0	0	0	0	0	0	0	0	0	0	0	0
hsa-miR-631	0	0	0	0	0	0	0	0	0	0	0	0	0	0	0	0	0	0	0	0	0	0	0	0	0	0	0	0	0	0	0	0	0	0	0	0	0	0	0	0
hsa-miR-6855-3p	0	0	2.23106	0	1.09422	0.618487	3.32918	0	0	0	0	0	1.49052	0	0	0	0.750564	0	0.7738	0	0.463121	0	1.08271	0	0.632256	0.672989	1.21359	1.09659	0	1.26397	0	3.28035	2.91887	0	2.06775	0	0	0	0	0
hsa-miR-4513	0	0	0	0	0	0	0	0	0	0	0	0	0	0	0	0	0	0	0	0	0	0	0	0	0	0	0	0	0	0	0	0	0	0	0	0	0	0	0	0
hsa-miR-617	0	0	0	0	0	0	0	0	0	0	0	0	0	0	0	0	0	0	0	0	0	0	0	0	0	0	0	0	0	0	0	0	0	0	0	0	0	0	0	0
hsa-miR-1253	0	0	0	0	0	0	0	0	0	0	0	0	0	0	0	0	0	0	0	0	0	0	0	0	0	0	0	0	0	0	0	0	0	0	0	0	0	0	0	0
hsa-miR-6088	0	0	0	0	0	0	0	0	0	0	0	0	0	0	0	0	0	0	0	0	0	0	0	0	0	0	0	0	0	0	0	0	0	0	0	0	0	0	0	0
hsa-miR-4708-5p	0	0	0	0	0	0	0	0	0	0	0	0	0	0	0	0	0	0	0	0	0	0	0	0	0	0	0	0	0	0	0	0	0	0	0	0	0	0	0	0
hsa-miR-5186	0	0	0	0	0	0	0	0	0	0	0	0	0	0	0	0	0	0	0	0	0	0	0	0	0	0	0	0	0	0	0	0	0	0	0	0	0	0	0	0
hsa-miR-4468	0	0	0	0	0.364741	0	0	0	0	0	0	0	0	0	0	0	0	0	0	0	0	0	0	0	0	0	0	0	0	0	0	0	0	0	2.06775	0	0	0	0	0
hsa-miR-3670	0	0	0	0	0	0	0	0	0	0	0	0	0	0	0	0	0	0	0	0	0	0	0	0	0	0	0	0	0	0	0	0	0	0	0	0	0	0	0	0
hsa-miR-3160-3p	0	0	0	0	0	0	0	0	0	0	0	0	0	0	0	0	0	0	0	0	0	0	0	0	0	0	0	0	0	1.26397	0	0	0	0	0	0	0	0	0	0
hsa-miR-4487	0	0	0	0	0	0	0	0	0	0	0	0	0	0	0	0	0	0	0	0	0	0	0	0	0	0	0	0	0	0	0	0	0	0	0	0	0	0	0	0
hsa-miR-4751	0	0	0	0	0	0	0	0	0	0	0	0	0	0	0	0	0	0	0	0	0	0	0	0	0	0	0	0	0	0	0	0	0	0	0	0	0	0	0	0
hsa-miR-1185-5p	0	0	0	0	0	0	0	0	0	0	0	0	0	0	0	0	0	0	0	0	0	0	0	0	0	0	0	0	0	0	0	0	0	0	0	0	0	0	0	0
hsa-miR-6884-5p	0	0	0	0	0.364741	0	0.832296	0	0	0	0	0	0	0	0	0	1.50113	0	0	0	0	0	0	0	0	0.672989	0	0	0	0	0	0	0	0	0	1.65598	0	0	0	1.6875
hsa-miR-485-5p	0	2.69364	0	0	0	1.23697	0	2.44166	0.939436	0	0	0	0	0	4.19548	0	0.750564	0	0.7738	0	2.77872	0.666919	2.16543	0	0	0	0	0	0	0	0	0	0	1.67781	0	0	0	0	0	0
hsa-miR-3188	0	0	0	0	0	0	1.66459	0	0.939436	0	0	0	0	2.9091	0	0	0	1.57236	1.5476	0	0	0	0	0.56837	0	0	0	0	1.15159	0	0	0	0	0	0	0	0	0	0	0
hsa-miR-4458	0	0	0	0	0	0	0	0	0	0	0	0	0	0	0	0	0	0	0	0	0	0	0	0	0	0	0	0	0	0	0	0	0	0	0	0	0	0	0	0
hsa-miR-202-3p	0	0	0	0	0	0	0	0	0	0	0	0	0	0	0	0	0	0	0	0	0	0	0	0	0	0	0	0	0	0	0	0	0	0	0	0	0	0	0	0
hsa-miR-655-5p	0	0	0	0	0	0	0	0	0	0	0	0	0	0	0	0	0	0	0	0	0.463121	0	0	0	0	0	0	0	0	0	0	0	0	0	0	0	0	0	0	0
hsa-miR-377-5p	0	0	0	0	0	0	0	0	0	0	0	0	0	0	0	0	0	0	0	0	0	0	0	0	0	0	0	1.09659	0	0	0	0	0	0	0	0	0	0	0	0
hsa-miR-4785	0	0	2.23106	0	0	0	0.832296	2.44166	0	0	0	0	0	0	0	0	0.750564	1.57236	0	0	0	0	0	0	0	0	0	0	0	0	0	0	0	0	0	0	0	0	0	0
hsa-miR-924	0	0	0	0	0	0	0	0	0	0	0	0	0	0	0	0	0	0	0	0	0	0	0	0	0	0	0	0	0	0	0	0	0	0	0	0	0	0	0	0
hsa-miR-4424	0	0	0	0	0	0	0	0	0	0	0	0	0	0	0	0	0	0	0	0	0	0	0	0	0	0	0	0	0	0	0	0	0	0	0	0	0	0	0	0
hsa-miR-3145-3p	0	0	0	0	0	1.23697	0	0	0.939436	0	1.7499	0	0.745261	1.45455	0	4.20426	0	0	0	0	0	0	0	1.13674	1.26451	0	0	0	0	0	0	0	0	0	0	3.31196	0	0	0	0
hsa-miR-383-5p	0	0	0	0	0	0	0	0	0	0	0	0	0	0	0	0	0	0	0	0	0	0	0	0	0	0	0	0	0	0	0	0	0	0	0	0	0	0	0	0
hsa-miR-3171	0	0	0	0	0	0	0	0	0	0	0	0	0	0	0	0	0	0	0	0	0	0	0	0	0	0	0	0	0	0	0	0	0	0	0	0	0	0	0	0
hsa-miR-219b-5p	0	0	0	0	0.364741	0.618487	0	0	0	3.00986	0	0	0	0	0	0	0	1.57236	0	0	0	0.666919	2.16543	0	0.632256	0.672989	0	0	1.15159	1.26397	0	0	0	0	0	0	0	0	0	1.6875
hsa-miR-4445-5p	0	0	0	0	0	0	0	0	0	0	0	0	0	0	0	0	0	0	0	0	0	0	0	0	0.632256	0	0	1.09659	0	0	0	0	1.45943	0	0	0	0	0	0	0
hsa-miR-1468-3p	0	0	0	0	0	0	0	0	0	0	0	0	0	0	0	0	0	0	0	0	0	0	0	0.56837	0	0	0	0	0	0	0	0	0	0	0	0	0	0	0	0
hsa-miR-4708-3p	0	0	0	2.49724	0	0	0	1.22083	0	0	0	0	0	0	0	0	0	0	0	0	0	0	0	0	0	0	0	3.28977	0	0	0	0	0	0	0	0	0	0	0	0
hsa-miR-8064	0	0	0	0	0	0	0	0	0	0	0	0	0	0	0	0	0	0	0	0	0	0	0	0	0	0	0	0	0	0	0	0	0	0	0	0	0	0	0	0
hsa-miR-298	0	0	0	0	0	0	0	0	0	0	0	0	0	0	0	0	0	0	0	0	0	0	0	0	0	0	0	0	0	0	0	0	0	0	0	0	0	0	0	0
hsa-miR-4771	0	0	0	0	0	0	0	0	0	0	0	0	0	0	0	0	0	0	0	0	0	0	0	0	0	0	0	0	0	0	0	0	0	0	0	0	0	0	0	0
hsa-miR-2467-3p	0	0	0	0	0	0	0	0	0	0	0	0	0	0	0	0	0	0	0	0	0	0	0	0	0	0	0	0	0	0	0	0	0	0	0	0	0	0	0	0
hsa-miR-6132	0	0	0	0	0	0	0	0	0	0	0	0	0	0	0	0	0	0	0	0	0	0	0	0	0	0	0	0	0	0	0	0	0	0	0	0	0	0	0	0
hsa-miR-3665	0	0	0	0	0	0	0	0	0	0	0	0	0	0	0	0	0	0	0	0	0	0	0	0	0	0	0	0	0	0	0	0	0	0	0	0	0	0	0	0
hsa-miR-6499-3p	0	0	0	0	0	0	0	0	0	0	0	0	0	0	0	0	0	0	0	0	0	0	0	0	0	0	0	0	0	0	0	0	0	0	0	0	0	0	0	0
hsa-miR-5689	0	0	0	0	0	0	0.832296	0	0	0	0	0	0	0	0	0	0	0	0	0	0.463121	0	0	0	0	0.672989	0	0	0	0	0	0	1.45943	0	0	0	0	0	0	0
hsa-miR-6076	0	0	0	0	0	0	0	0	0	0	0	0	0	0	0	0	0	0	0	0	0	0	0	0	0	0	0	0	0	0	0	0	0	0	0	0	0	0	0	0
hsa-miR-4480	0	0	0	0	0	0	0	0	0	0	0	0	0	0	0	0	0	0	0	0	0	0	0	0	0	0	0	0	0	0	0	0	0	0	0	0	0	0	0	0
hsa-miR-4755-3p	0	0	0	0	0	0	0	1.22083	0	0	0	0	0	0	0	0	0	0	0	0	0	0	0	0	0	0	0	0	0	0	0	0	0	0	0	0	0	0	0	0
hsa-miR-4313	0	0	0	0	0	0	0	0	0	0	0	0	0	0	0	0	0	0	0	0	0	0	0	0	0	0	0	0	0	0	0	0	0	0	0	0	0	0	0	0
hsa-miR-4707-3p	0	0	0	0	0	0	0	0	0	0	0	0	0	0	0	0	0	0	0	0	0	0	0	0	0	0	0	0	0	0	0	0	0	0	0	0	0	0	0	0
hsa-miR-3648	0	0	0	0	0	0	0	0	0	0	0	0	0	0	0	0	0	0	0	0	0	0	0	0	0	0	0	0	0	0	0	0	0	0	0	0	0	0	0	0
hsa-miR-6743-3p	0	0	0	0	0.364741	0.618487	0	1.22083	0	0	0	0	0	0	0	0	0	0	0	0	0	0	0	0	0	0	0	0	0	0	0	0	0	0	0	0	0	0	0	0
hsa-miR-6811-3p	0	0	0	0	0	0	0	0	0	0	0	0	0	0	0	0	0	0	0	0	0	0	0	0	0	0	0	0	0	0	0	0	0	0	0	0	0	0	0	0
hsa-miR-5581-5p	0	0	0	0	0	0	0	0	0	0	0	0	0	0	0	0	0	0	0	0	0	0	0	0	0	0	0	0	0	0	0	0	0	0	0	0	0	0	0	0
hsa-miR-381-5p	0	0	0	0	0	0	0	0	0	0	0	0	0	0	0	0	0	0	0	0	0	0	0	0	0	0	0	0	0	0	0	0	0	0	0	0	0	0	0	0
hsa-miR-4706	0	0	0	0	0	0	0	0	0	0	0	0	0	0	0	0	0	0	0	0	0	0	0	0	0	0	0	0	0	0	0	0	0	0	0	0	0	0	0	0
hsa-miR-4746-3p	0	0	0	0	0	0	0	0	0	0	0	0	0	0	0	0	0	0	0	0	0	0	0	0	0	0	0	0	0	0	0	0	0	0	0	0	0	0	0	0
hsa-miR-6853-5p	0	0	0	0	0	0	0	0	0	0	0	0	0	0	0	0	0	0	0	0	0	0	0	0	0	0	0	0	0	0	0	0	0	0	0	0	0	0	0	0
hsa-miR-548v	0	0	0	0	0	0	0	0	0	0	0	0	0	0	0	0	0	0	0	0	0	0	0	0	0	0	0	0	0	0	0	0	0	0	0	0	0	0	0	0
hsa-miR-549a-5p	0	0	0	0	0	0	0	0	0	0	0	0	0	0	0	0	0	0	0	0	0	0	0	0	0	0	0	0	0	0	0	0	0	0	0	0	0	0	0	0
hsa-miR-7106-3p	0	0	0	0	0	0	0	0	0	0	0	0	0	0	0	0	0	0	0	0	0	0	0	0	0	0	0	0	0	0	0	0	0	0	0	0	0	0	0	0
hsa-miR-6502-5p	0	0	0	0	0	0	0	0	0	0	0	0	0	0	0	0	0	0	0	0	0	0	0	0	0	0	0	0	0	0	0	0	0	0	0	0	0	0	0	0
hsa-miR-4663	0	0	0	0	0	0	0	0	0	0	0	0	0	0	0	0	0	0	0	0	0	0	0	0	0	0	0	1.09659	0	0	0	0	0	0	0	0	0	0	0	0
hsa-miR-133a-5p	0	0	0	0	0	0	0	0	0	0	0	0	0	0	0	0	0	0	0	0	0	0	0	0	0	0	0	0	0	0	0	0	0	0	0	0	0	0	0	0
hsa-miR-1537-5p	0	0	0	0	0	0.618487	0	0	0	0	0	0	0	0	0	0	0.750564	0	0	0	0	0	0	0	0	0	0	0	0	0	0	0	0	0	0	1.65598	0	0	0	0
hsa-miR-4718	0	0	0	0	0	0	0	0	0	0	0	0	0	0	0	0	0	0	0	0	0	0	0	0	0	0	0	0	0	0	0	0	0	0	0	0	0	0	0	0
hsa-miR-626	0	0	0	0	0	0	0	0	0	0	0	0	0	0	0	0	0	0	0	0	0	0	0	0	0	0	0	0	0	0	0	0	0	0	0	0	0	0	0	0
hsa-miR-6876-3p	0	0	0	0	0	0	0	0	0	0	0	0	0	0	0	0	0	0	0	0	0	0	0	0	0	0	0	0	0	0	0	0	0	0	0	0	0	0	0	0
hsa-miR-2115-5p	0	0	0	0	0	0	0	0	0	0	0	0	0	0	0	0	0	0	0	0	0	0.666919	0	0	0	0	0	0	0	0	0	0	0	1.67781	0	0	0	0	0	0
hsa-miR-103a-2-5p	0	0	0	0	0	0	0	0	0	0	0	0	0	0	0	0	0	0	0	0	0	0	0	0	0	0	0.303397	0	1.15159	0	0	0	0	0	0	0	0	0	0	1.6875
hsa-miR-3140-3p	0	0	0	2.49724	0.364741	0	2.49689	0	0	0	0	0	0.745261	0	0	0	0	0	0	0	0.463121	0.666919	0	0	0.632256	0	0.910191	0	0	1.26397	0	0	0	0	0	1.65598	1.22472	0	0	0
hsa-miR-4261	0	0	0	0	0	0	0	0	0	0	0	0	0	0	0	0	0	0	0	0	0	0	0	0	0	0	0	0	0	0	0	0	0	0	0	0	0	0	0	0
hsa-miR-5093	0	0	0	0	0	0	0	0	0	0	0	0	0	0	0	0	0	0	0	0	0	0	0	0	0	0	0	0	0	0	0	0	0	0	0	0	0	0	0	0
hsa-miR-6828-5p	0	0	0	0	0	0	0	0	0	0	0	0	0	0	0	0	0	0	0	0	0	0	0	0	0	0	0	0	0	0	0	0	0	0	0	0	1.22472	0	0	0
hsa-miR-613	0	0	0	0	0	0	0	0	0	0	0	0	0	0	0	0	0	0	0	0	0	0	0	0	0	0	0	0	0	0	0	0	0	0	0	0	0	0	0	0
hsa-miR-492	0	0	0	0	0	0	0	0	0	0	0	0	0	0	0	0	0	0	0	0	0	0	0	0	0	0	0	0	0	0	0	0	0	0	0	0	0	0	0	0
hsa-miR-4740-5p	0	0	0	0	0	0	0	0	0	0	0	0	0	0	0	0	0	0	0	0	0	0	0	0	0	0	0	0	0	0	0	0	0	0	0	0	0	0	0	0
hsa-miR-4515	0	0	0	0	0	0	0	0	0	0	0	0	0	0	0	0	0	0	0	0	0	0	0	0	0	0	0	0	0	0	0	0	0	0	0	0	0	0	0	0
hsa-miR-4434	0	0	0	0	0	0	0	0	0	0	0	0	0	0	0	0	0	0	0	0	0	0	0	0	0	0	0	0	0	0	0	0	0	0	0	0	0	0	0	0
hsa-miR-5703	0	0	0	0	0	0	0	0	0	0	0	0	0	0	0	0	0	0	0	0	0	0	0	0	0	0	0	0	0	0	0	0	0	0	0	0	0	0	0	0
hsa-miR-5192	0	0	0	0	0	0	0	0	0	0	0	0	0.745261	0	0	0	0	0	0	0	0	0	0	0	0.632256	0.672989	0	0	0	0	0	0	0	0	0	0	0	0	0	0
hsa-miR-6081	0	0	0	0	0	0	0	0	0	0	0	0	0	0	0	0	0	0	0	0	0	0	0	0	0	0	0	0	0	0	0	0	0	0	0	0	0	0	0	0
hsa-miR-4633-3p	0	0	0	0	0	0	0	0	0	0	0	0	0	0	0	0	0	0	0	0	0.463121	0	0	0	0	0	0	0	0	0	0	0	0	0	0	0	0	0	0	0
hsa-miR-6500-5p	0	0	0	0	0	0	0	0	0	0	0	0	0	0	0	0	0	0	0	0	0	0	0	0	0	0	0	0	0	0	0	0	0	0	0	0	0	0	0	0
hsa-miR-766-5p	0	0	2.23106	0	0	0.618487	0	0	0	0	0	0	0	0	0	0	0.750564	0	0.7738	1.05629	0	0	1.08271	0.56837	1.26451	0	0.910191	0	0	0	0	0	0	0	0	0	0	0	0	0
hsa-miR-7154-3p	0	0	0	0	0	0	0	0	0	0	0	0	0	0	0	0	0	0	0	0	0	0	0	0	0	0	0	0	0	0	0	0	0	0	0	0	0	0	0	0
hsa-miR-11181-3p	0	0	0	0	0	0	0	0	0	0	0	0	0	0	0	0	0	0	0	0	0	0	0	0	0	0	0	0	0	0	0	0	0	0	0	0	0	0	0	0
hsa-miR-6894-5p	0	0	0	0	1.09422	0.618487	0	0	0.939436	0	0	0	0	0	0	0	0	0	0	0	0.463121	0	0	0.56837	0.632256	0	0	0	0	1.26397	2.23593	0	0	0	0	1.65598	0	0	0	0
hsa-miR-650	0	0	0	0	0	0	0	0	0	0	0	0	0	0	0	0	0	0	0	0	0	0	0	0	0	0	0	0	0	0	0	0	0	0	0	0	0	0	0	0
hsa-miR-3612	0	0	0	0	0	0	0	0	0	0	0	0	0	0	0	0	0	0	0	0	0	0	0	0	0	0	0	0	0	0	0	0	0	0	0	0	0	0	0	0
hsa-miR-6797-5p	0	0	0	0	0	0	0.832296	0	0	0	0	0	0	0	0	0	0	0	0	0	0	0	1.08271	0	0	0	0	0	0	0	0	0	0	0	0	0	0	0	0	0
hsa-miR-1249-5p	0	0	0	0	0	0	0	0	0	0	0	0	0.745261	0	0	0	0	0	0	0	0	0	0	0	0	0	0	0	0	0	0	0	0	0	0	0	0	0	0	0
hsa-miR-6851-5p	0	0	0	2.49724	0.729481	0	1.66459	0	0	0	1.7499	0	0.745261	0	0	0	0	0	0.7738	0	0	0.666919	1.08271	0	0	0	0.303397	1.09659	2.30317	0	0	0	0	0	0	0	0	0	0	0
hsa-miR-5191	0	0	0	0	0	0	0	0	0	0	0	0	0	0	0	0	0	0	0	0	0	0	0	0	0	0	0	0	0	0	0	0	0	0	0	0	0	0	0	0
hsa-miR-1255a	0	0	0	0	0	0	0	0	0	1.50493	0	9.05067	0.745261	0	0	0	0	1.57236	0	0	4.16809	0	0	0.56837	0	2.01897	0.606794	1.09659	0	0	0	0	1.45943	1.67781	0	0	1.22472	2.39466	0	0
hsa-miR-3167	0	0	0	0	0	0	0	0	0	0	0	0	0	0	0	0	0	0	0	0	0	0	0	0	0.632256	0	0	0	0	0	0	0	0	0	0	0	0	0	0	0
hsa-miR-593-5p	0	0	0	0	0	0	0	0	0	0	0	0	0	0	0	0	0	0	0	0	0	0	0	0	0	0	0	0	0	0	0	0	0	0	0	0	0	0	0	0
hsa-miR-564	0	0	0	0	0	0	0	0	0	0	0	0	0	0	0	0	0	0	0	0	0	0	0	0	0	0	0	0	0	0	0	0	0	0	0	0	0	0	0	0
hsa-miR-885-3p	0	0	2.23106	0	1.45896	0	0.832296	0	0	0	1.7499	0	0	0	0	0	1.50113	0	0	0	0	0	0	0	0	0	2.42718	0	0	0	2.23593	0	0	1.67781	0	0	0	2.39466	0	1.6875
hsa-miR-4763-3p	0	0	0	2.49724	0	0	0	0	0.939436	1.50493	0	0	0	1.45455	0	0	0	0	0	0	0	0	0	0	0	0	0	0	0	0	0	0	0	0	0	0	0	0	0	0
hsa-miR-4736	0	0	0	0	0	0	0	0	0	0	0	0	0	0	0	0	0	0	0	0	0	0	0	0	0	0	0	0	0	0	0	0	0	0	0	0	0	0	0	0
hsa-miR-449b-5p	0	0	2.23106	2.49724	0.364741	0	0	0	1.87887	1.50493	0	0	0	0	0	0	0	0	0.7738	0	0.463121	0	0	1.13674	1.26451	0.672989	0	0	1.15159	0	0	0	1.45943	1.67781	0	0	1.22472	2.39466	0	0
hsa-miR-3622b-5p	0	0	0	0	0	0	0	0	0	0	0	0	0	0	0	0	0	0	0	0	0	0	0	0	0	0	0	0	0	0	0	0	0	0	0	0	0	0	0	0
hsa-miR-1256	0	0	0	0	0	0	0.832296	0	0	0	0	0	0	0	0	0	0	0	0	0	0	0	0	0	0	0	0	0	0	0	0	0	0	0	0	0	0	0	0	0
hsa-miR-4529-5p	0	0	0	0	0	0	0	0	0	0	0	0	0	0	0	0	0	0	0	0	0	0	0	0	0	0	0	0	0	0	0	0	0	0	0	0	0	0	0	0
hsa-miR-6775-3p	0	0	0	0	0	0	0	0	0	0	0	0	0	0	0	0	0	0	0	0	0	0.666919	0	0	0	0	0	0	0	0	0	0	0	0	0	0	0	0	0	0
hsa-miR-4757-5p	0	0	0	0	0	0	0	0	0	0	0	0	0	0	0	0	0	0	0	0	0	0	0	0.56837	0	0	0	0	0	0	0	3.28035	0	0	0	0	0	0	0	0
hsa-miR-6735-3p	0	0	0	0	0	0	0	0	0	0	0	0	0	0	0	0	0	0	0	0	0	2.00076	0	0	0	0	0	0	0	0	0	0	0	0	0	0	0	0	0	0
hsa-miR-6722-5p	0	0	0	0	0	0	0	0	0	0	0	0	0	0	0	0	0	0	0	0	0	0	0	0	0	0	0	0	0	0	0	0	0	0	0	0	0	0	0	0
hsa-miR-663a	0	0	0	0	0	0	0	0	0	0	0	0	0	0	0	0	0	0	0	0	0	0	0	0	0	0	0	0	0	0	0	0	0	0	0	0	0	0	0	0
hsa-miR-6822-3p	0	0	0	0	0	0	0	0	0	0	0	0	0	0	0	0	0	0	0	0	0	0	0	0	0	0	0	0	0	0	0	0	0	0	0	0	0	0	0	0
hsa-miR-604	0	0	0	0	0	0	0	0	0	0	0	0	0	0	0	0	0	0	0	0	0	0	0	0	0	0	0	0	0	0	0	0	0	0	0	0	0	0	0	0
hsa-miR-4430	0	0	0	0	0	0	0	0	0	0	0	0	0	0	0	0	0	0	0	0	0	0	0	0	0	0	0	0	0	0	0	0	0	0	0	0	0	0	0	0
hsa-miR-4505	0	0	0	0	0	0	0	0	0	0	0	0	0.745261	0	0	0	0	0	0	0	0	0	0	0	0	0	0	0	0	0	0	0	0	0	0	0	0	0	0	0
hsa-miR-7974	0	0	0	0	0	0	0	0	0	0	0	0	0	0	0	0	0	0	0	0	0	0	0	0	0	0	0	0	0	0	0	0	0	0	0	0	0	0	0	0
hsa-miR-4668-5p	0	1.34682	2.23106	0	0.364741	0	0	0	0	1.50493	0	0	0.745261	0	0	0	0	0	0.7738	1.05629	1.38936	0	0	0.56837	0	0.672989	0.303397	0	0	1.26397	0	0	0	1.67781	0	0	0	0	0	0
hsa-miR-4747-5p	0	0	0	0	0	0	0	0	0	0	0	0	0	0	0	0	0	0	0	0	0	0	0	0	0	0	0	0	0	0	0	0	0	0	0	0	0	0	0	0
hsa-miR-5196-5p	0	0	0	0	0	0	0	0	0	0	0	0	0	0	0	0	0	0	0	0	0	0	0	0	0	0	0	0	0	0	0	0	0	0	0	0	0	0	0	0
hsa-miR-3649	0	0	0	0	0	0	0	0	0	0	0	0	0	0	0	0	0	0	0	0	0	0	0	0	0	0	0	0	0	0	0	0	0	0	0	0	0	0	0	0
hsa-miR-3199	0	0	0	0	0	0	0	0	0	0	0	0	0	0	0	0	0	0	0	0	0	0	0	0	0	0	0	0	0	0	0	0	0	0	0	0	0	0	0	1.6875
hsa-miR-6878-5p	0	0	0	0	0	0	0	0	0	0	0	0	0	0	0	0	0	0	0	0	0	0	0	0	0	0	0	0	0	0	0	0	1.45943	0	0	0	0	0	0	0
hsa-miR-6883-5p	0	0	0	0	0	0	0	0	0	0	0	0	0	1.45455	0	0	0	0	0	0	0	0	0	0	0	0	0	0	0	0	0	0	0	0	0	0	1.22472	0	0	0
hsa-miR-638	0	0	0	0	0	0	0	0	0	0	0	0	0	0	0	0	0	0	0	0	0	0	0	0	0	0	0	0	0	0	0	0	0	0	0	0	0	0	0	0
hsa-miR-3945	0	0	0	0	0	0	0	0	0	0	0	0	0	0	0	0	0	0	0	0	0	0	0	0	0	0	0	0	0	0	0	0	0	0	0	0	0	0	0	0
hsa-miR-4253	0	0	0	0	0	0	0	0	0	0	0	0	0	0	0	0	0	0	0	0	0	0	0	0	0	0	0	0	0	0	0	0	0	0	0	0	0	0	0	0
hsa-miR-4726-5p	0	0	0	0	0	0	0.832296	0	0.939436	3.00986	3.4998	0	0	0	0	0	0.750564	0	1.5476	0	0.463121	0	0	0	0	0	0.303397	0	0	0	0	0	0	0	0	0	0	0	0	0
hsa-miR-5001-5p	0	0	0	0	0.364741	0	0	0	0	0	0	0	0	0	0	0	0	0	0	0	0	0	0	0	0	0	0	0	0	0	0	0	0	0	0	0	1.22472	0	0	0
hsa-miR-3144-5p	0	1.34682	0	0	1.09422	0	2.49689	0	0	1.50493	0	0	0	0	0	0	0	0	0	1.05629	0	0.666919	0	1.13674	0	0	0	1.09659	0	0	2.23593	0	0	1.67781	0	0	0	0	2.64044	1.6875
hsa-miR-4652-5p	0	0	0	0	0	0	0	0	0	0	0	0	0	0	0	0	0	0	0	0	0	0	0	0	0	0	0	0	0	1.26397	0	0	0	0	0	0	0	0	0	0
hsa-miR-5010-5p	0	0	0	0	0	0.618487	0	1.22083	0.939436	0	1.7499	0	3.7263	0	0	4.20426	0	1.57236	1.5476	0	1.85248	0	2.16543	0.56837	0.632256	1.34598	0.606794	2.19318	1.15159	0	2.23593	0	1.45943	0	0	0	1.22472	0	0	0
hsa-miR-4697-5p	0	0	0	0	0	0	0	0	0	0	0	0	0	0	0	0	0	0	0	0	0	0	0	0	0	0	0	0	0	0	0	0	0	0	0	0	0	0	0	0
hsa-miR-6885-5p	0	0	0	0	0	0	0	0	0	0	0	0	0	0	0	0	0	0	0	0	0	0	0	0	0	0	0	0	0	0	0	0	0	0	0	0	0	0	0	0
hsa-miR-6835-5p	0	0	0	0	0	0	0	0	0	0	0	0	0	0	0	0	0	0	0	0	0	0	0	0	0	0	0	0	0	0	0	0	0	0	0	0	0	0	0	0
hsa-miR-608	0	0	0	0	0	0	0	0	0	0	0	0	0	0	0	0	0	0	0	0	0	0	0	0	0	0	0	0	0	0	0	0	0	0	0	0	0	0	0	0
hsa-miR-6747-5p	0	0	0	0	0	0	0	0	0	0	0	0	0	0	0	0	0	0	0	0	0	0	1.08271	0	0	0	0	0	0	0	0	0	0	0	0	0	0	0	0	0
hsa-miR-555	0	0	0	0	0	0	0	0	0	0	0	0	0	0	0	0	0	0	0	0	0	0	0	0	0	0	0	0	0	0	0	0	0	0	0	0	0	0	0	0
hsa-miR-6756-5p	0	0	0	0	0	0	0	0	0	0	0	0	0	0	0	0	0	0	0	0	0	0	0	0	0	0	0	0	0	0	0	0	0	0	0	0	0	0	0	0
hsa-miR-4455	0	0	0	0	0	0	0	0	0	0	0	0	0	0	0	0	0	0	0	0	0	0	0	0	0	0	0	0	0	0	0	0	0	0	0	0	0	0	0	0
hsa-miR-609	0	0	0	0	0.364741	0	0	0	0	0	0	0	0	1.45455	0	0	0	0	0	1.05629	0.463121	1.33384	0	0	0	0	0	0	0	0	2.23593	0	0	0	0	0	0	0	0	0
hsa-miR-4650-3p	0	0	0	0	0	0	0	0	0	0	0	0	0	0	0	0	0	0	0	0	0	0	0	0	0	0	0	0	0	0	0	0	0	0	0	0	0	0	0	0
hsa-miR-3529-5p	0	0	0	0	0	0	0	0	0	0	0	0	0	0	0	0	0	0	0	0	0	0	0	0	0	0	0	0	0	0	0	0	0	0	0	0	0	0	0	0
hsa-miR-5681b	0	0	0	0	0	0	0	0	0	0	0	0	0	0	0	0	0	0	0	0	0	0	0	0	0	0	0	0	0	0	0	0	0	0	0	0	0	0	0	0
hsa-miR-6503-5p	0	0	0	0	0	0	0	0	0	0	0	0	0	0	0	0	0	0	0	0	0	0	0	0	0	0	0	0	0	0	0	0	0	0	0	0	0	0	0	0
hsa-miR-3085-5p	0	0	0	0	0	0	0	0	0	0	0	0	0	0	0	0	0	0	0	0	0	0	0	0	0	0	0	0	0	0	0	0	0	0	0	0	0	0	0	0
hsa-miR-3907	0	0	0	0	0	0	0	0	0	0	0	0	0	0	0	0	0	0	0	0	0	0	0	0	0	0	0	0	0	0	0	0	0	0	0	0	0	0	0	0
hsa-miR-3165	0	0	0	0	0	0	0	0	0	0	0	0	0	0	0	0	0	0	0	0	0	0	0	0	0	0	0	0	0	0	0	0	0	0	0	0	0	0	0	0
hsa-miR-6769a-5p	0	0	0	0	0	0	0	0	0	0	0	0	0	0	0	0	0	0	0	0	0	0	0	0	0	0	0	0	0	0	0	0	0	0	0	0	0	0	0	0
hsa-miR-3650	0	0	0	0	0	0	0	0	0	0	0	0	0	0	0	0	0	0	0	0	0	0	0	0	0	0	0	0	0	0	0	0	0	0	0	0	0	0	0	0
hsa-miR-4694-5p	0	0	0	0	0	0	0	0	0	0	0	0	0	0	0	0	0	0	0	0	0	0	0	0	0	0	0	0	0	0	0	0	0	0	0	0	0	0	0	0
hsa-miR-409-5p	0	0	0	0	0	0	0	0	0	0	0	0	0	0	0	0	1.50113	0	0	1.05629	3.70497	0	0	0.56837	0	0	0	0	0	0	0	0	1.45943	0	0	3.31196	0	0	0	0
hsa-miR-152-5p	0	1.34682	0	0	0	0	0.832296	0	0	0	0	0	0.745261	0	0	0	0	1.57236	0	1.05629	0.463121	0	0	0	0	0	0.606794	0	0	0	0	0	1.45943	0	0	0	0	0	0	0
hsa-miR-563	0	0	0	0	0	0	0	0	0	0	0	0	0	0	0	0	0	0	0	0	0	0	0	0	0	0	0	0	0	0	0	0	0	0	0	0	0	0	0	0
hsa-miR-656-5p	0	0	0	0	0	0	0	0	0	0	0	0	0	0	0	0	0	0	0	0	0	0	0	0	0	0	0	0	0	0	0	0	0	0	0	0	0	0	0	0
hsa-miR-92a-1-5p	0	0	0	0	0.729481	0.618487	2.49689	3.66249	0.939436	0	0	0	0	0	1.39849	0	0.750564	1.57236	1.5476	2.11257	0	0	1.08271	1.13674	2.52902	0.672989	0.910191	1.09659	5.75793	0	2.23593	0	0	3.35563	4.13549	1.65598	2.44944	4.78933	0	0
hsa-miR-323b-5p	0	0	0	0	0	0	0	0	0	0	0	0	0	0	0	0	0	0	0	0	0	0	0	0	0	0	0	0	0	0	0	0	0	0	0	0	0	0	0	0
hsa-miR-494-5p	0	0	0	0	0	0	0	0	0	0	0	0	0	0	0	0	0	0	0	0	0	0	0	0	0	0	0	0	0	0	0	0	0	0	0	0	0	0	0	0
hsa-miR-410-5p	0	0	0	0	0	0	0	0	0	0	0	0	0	0	0	0	0	0	0	0	0	0	0	0	0	0	0	0	0	0	0	0	0	0	0	0	0	0	0	0
hsa-miR-6832-5p	0	0	0	0	0	0.618487	0	0	0.939436	0	0	0	0	0	0	0	0.750564	0	0	0	0.463121	0	1.08271	0	0	0	0	0	0	0	0	0	0	0	2.06775	0	0	0	0	0
hsa-miR-567	0	0	0	0	0	0	0	0	0	0	0	0	0	0	0	0	0	0	0	0	0	0	0	0	0	0	0	0	0	0	0	0	0	0	0	0	0	0	0	0
hsa-miR-630	0	0	0	0	0	0	0	0	0	0	0	0	0	0	0	0	0	0	0	0	0	0	0	0	0	0	0	0	0	0	0	0	0	0	0	0	0	0	0	0
hsa-miR-1257	0	0	0	0	0	0	0	0	0	0	0	0	0	0	0	0	0	0	0	0	0	0	0	0	0	0	0	0	0	0	0	0	0	0	0	0	0	0	0	0
hsa-miR-550a-3-5p	0	0	0	0	0	0.618487	0	0	0	0	0	0	0	0	0	0	0	0	0	0	0.463121	0	0	0	0	0	0.303397	0	0	0	0	0	0	0	2.06775	0	0	0	0	0
hsa-miR-550a-5p	0	0	0	0	0	0	0.832296	0	0.939436	0	0	0	0	0	0	0	0.750564	0	0	0	0.463121	0.666919	1.08271	0	0	0	0	1.09659	0	0	0	0	0	0	0	1.65598	0	0	0	0
hsa-miR-1271-3p	0	0	0	0	0.364741	0	0	0	0	0	0	0	0	0	0	0	0	0	0	0	0	0	0	0	0	0	0	0	0	0	0	0	0	0	0	0	0	0	0	0
hsa-miR-4800-5p	0	0	0	0	0	0	0	0	0.939436	0	0	0	0.745261	0	1.39849	0	0	0	0.7738	0	0.926242	0	2.16543	1.13674	0.632256	2.01897	0.303397	1.09659	1.15159	0	2.23593	0	0	0	0	1.65598	0	0	0	0
hsa-miR-3691-5p	0	0	0	0	0	0	0	0	0	0	0	9.05067	0	0	1.39849	0	1.50113	0	0	0	0	0	0	0	0.632256	0.672989	0	0	0	1.26397	0	0	0	0	0	0	0	0	0	0
hsa-miR-3688-5p	0	0	0	0	0	0	0	0	0	0	0	0	0	0	0	0	0	0	0	0	0	0	0	0	0	0	0	0	0	0	0	0	0	0	0	0	0	0	0	0
hsa-miR-891a-3p	0	0	0	0	0	0	0	0	0.939436	0	0	0	0	0	0	0	0	0	0	0	0	0.666919	0	0	0	0	0.606794	1.09659	0	0	2.23593	0	0	0	0	0	0	0	0	0
hsa-miR-6778-5p	0	0	0	0	0	0	0	0	0	0	0	0	0	0	0	0	0	0	0	0	0	0	0	0	0	0	0	0	0	0	0	0	0	0	0	0	0	0	0	0
hsa-miR-1233-5p	0	0	0	0	0	0	0	0	0	0	0	0	0	0	0	0	0	0	0	0	0	0	0	0	0	0	0	0	0	0	0	0	0	0	0	0	0	0	0	0
hsa-miR-6742-5p	0	0	0	0	0	0	0	0	0	0	0	0	0	0	0	0	0	0	0	0	0	0	0	0	0	0	0	0	0	1.26397	0	0	0	0	0	0	0	0	0	0
hsa-miR-203a-5p	0	0	0	0	0	0	0	0	0	0	0	0	0	0	0	0	0	0	0	0	0	0	0	0	0	0	0	0	0	0	0	0	0	0	0	0	0	0	0	0
hsa-miR-644a	0	0	0	0	0	0	0	0	0	0	0	0	0	0	0	0	0	0	0	0	0	0	0	0	0	0	0	0	0	0	0	0	0	0	0	0	0	0	0	0
hsa-miR-569	0	0	0	0	0	0	0	0	0	0	0	0	0	0	0	0	0	0	0	0	0	0	0	0	0	0	0	0	0	0	0	0	0	0	0	0	0	0	0	0
hsa-miR-1258	0	0	0	0	0	0	0	0	0	0	0	0	0	0	0	0	0	0	0	0	0	0	0	0	0	0	0	0	0	0	0	0	0	0	0	0	0	0	0	0
hsa-miR-6501-5p	0	0	0	0	0	0.618487	0	1.22083	0	0	0	0	0	0	1.39849	0	0	0	0	0	0.463121	0.666919	0	0.56837	0	0.672989	0.606794	1.09659	1.15159	0	0	0	0	0	0	0	0	0	0	0
hsa-miR-4423-5p	0	0	0	0	0.364741	0	0	0	0	0	0	0	0	0	0	0	0	0	0	0	0	0	0	0	0	0	0	0	0	0	0	0	0	0	0	0	0	0	0	0
hsa-miR-6740-5p	0	0	0	0	0	0	0	0	0	0	0	0	0	0	0	0	0	0	0	0	0	0.666919	0	0	0	0	0	0	0	0	0	0	0	0	0	0	0	0	0	0
hsa-miR-19b-2-5p	0	0	0	2.49724	0	0	0	0	0	0	0	0	0	0	0	0	0	0	0	0	0	0	0	0	0	0	0	0	0	0	0	0	0	0	2.06775	0	1.22472	0	0	0
hsa-miR-19a-5p	0	0	0	0	0	0	0	0	0	0	0	0	0	0	0	0	0	0	0	0	0	0	0	0	0	0	0	0	0	1.26397	0	0	0	0	0	0	0	0	0	0
hsa-miR-3143	0	0	0	0	0	0	0	0	0	0	0	0	0	0	0	0	0	0	0	0	0	0	0	0	0	0	0	0	0	0	0	0	0	0	0	0	0	0	0	0
hsa-miR-208a-3p	0	0	0	0	0	0	0	0	0	0	0	0	0	0	0	0	0	0	0	0	0	0	0	0	0	0	0	0	0	0	0	0	0	0	0	0	0	0	0	0
hsa-miR-374c-5p	0	0	0	0	0	0	0	0	0	0	0	0	0	0	0	0	0	0	0	0	0	0	0	0	0	0.672989	0	0	0	0	0	0	0	0	0	0	0	0	0	0
hsa-miR-655-3p	0	0	0	0	0	0	0	0	0	1.50493	0	0	0	0	0	0	0	0	0	0	0.463121	0	0	0	0	0	0	0	0	0	0	0	0	0	0	0	0	0	0	0
hsa-miR-4666a-5p	0	0	0	0	0	0	0	0	0	0	0	0	0	0	0	0	0	0	0	0	0	0	0	0	0	0.672989	0	0	0	0	0	0	0	0	0	0	0	0	0	0
hsa-miR-5591-3p	0	0	0	0	0	0	0	0	0	0	0	0	0	0	0	0	0	0	0	0	0	0	0	0	0	0	0	0	0	0	0	0	0	0	0	0	0	0	0	0
hsa-miR-4777-3p	0	0	0	0	0	0	0	0	0	0	0	0	0	0	0	0	0	0	0	0	0	0	0	0	0.632256	0	0	0	0	0	0	0	0	0	0	0	0	0	0	0
hsa-miR-4693-5p	0	0	0	0	0	0	0	0	0	0	0	0	0	0	0	0	0	0	0	0	0	0	0	0	0	0	0	0	0	0	0	0	0	0	0	0	0	0	0	0
hsa-miR-4766-3p	0	0	0	0	0.729481	1.23697	0.832296	1.22083	0	0	0	0	0	0	0	0	0.750564	0	0	1.05629	0	0	0	0.56837	0	0.672989	0.303397	0	0	0	0	0	0	0	0	0	0	0	0	0
hsa-miR-4524b-5p	0	0	0	0	0	0	0	0	0	0	0	0	0	0	0	0	0	0	0	0	0	0	0	0	0	0	0	0	0	0	0	0	0	0	0	0	0	0	0	0
hsa-miR-4524a-5p	0	0	0	0	0	0	0	0	0	0	0	0	0	0	0	0	0	0	0	0	0	0	0	0	0	0	0	0	0	0	0	0	0	0	0	0	0	0	0	0
hsa-miR-3117-3p	0	6.7341	2.23106	0	1.45896	1.23697	2.49689	1.22083	4.69718	6.01972	0	18.1013	5.21683	8.72731	8.39096	0	6.75508	6.28943	4.6428	5.28143	2.3156	4.66843	4.33086	4.54696	3.16128	3.36494	2.42718	4.38636	3.45476	2.52794	0	13.1214	4.3783	6.71126	2.06775	4.96794	6.12361	7.18399	2.64044	6.74999
hsa-miR-4423-3p	0	0	0	0	0	0	0	0	0	0	0	0	0	0	0	0	0	0	0	0	0	0	0	0	0	0	0	0	0	0	0	0	0	0	0	0	0	0	0	0
hsa-miR-4727-3p	0	0	0	0	0	0	0	0	0	3.00986	0	0	0	0	0	0	0	0	0	0	0	0	0	0	0	0.672989	0	0	0	0	0	0	0	0	0	0	0	0	0	0
hsa-miR-4460	0	0	0	0	0	0	0	0	0	0	1.7499	0	0	0	0	0	0	0	0	0	0	0	0	0	0	0	0	0	0	0	0	0	0	0	0	0	0	0	0	0
hsa-miR-1185-2-3p	0	0	0	0	0	0	0	1.22083	0	0	0	0	0	0	0	0	0	0	0	0	0	0	0	0	0	0	0	0	0	0	0	0	0	0	0	0	0	0	0	0
hsa-miR-1185-1-3p	0	0	0	0	0	0	0	0	0	0	0	0	0	0	0	0	0	0	0	0	0.463121	0	0	0	0.632256	0	0	0	0	0	0	0	0	0	0	0	0	0	0	0
hsa-miR-4633-5p	0	0	0	0	0	0	0	0	0	0	0	0	0	0	1.39849	0	0	0	0	0	0	0	0	0	0	0	0	0	0	0	0	0	0	0	0	0	0	0	0	0
hsa-miR-3115	0	0	0	0	0	0.618487	0	0	0	0	0	0	0	0	0	0	1.50113	0	0	0	0.463121	0	1.08271	0	0	0	0	0	0	0	2.23593	0	0	0	0	0	0	0	0	0
hsa-miR-3924	0	0	0	0	0	0	0	0	0	0	0	0	0	0	0	0	0	0	0	0	0	0	0	0	0	0	0	0	0	0	0	0	1.45943	0	0	0	0	0	0	0
hsa-miR-4795-3p	0	0	0	0	0.364741	0	0	0	0	0	0	0	0	0	0	0	0.750564	0	0	0	0.926242	0	0	0	0.632256	0.672989	0	0	0	1.26397	0	0	1.45943	0	0	0	0	0	0	0
hsa-miR-3671	0	0	0	0	0	0	0	0	0	0	0	0	0	0	0	0	0	0	0	0	0	0	0	0	0	0	0	0	0	0	0	0	0	0	0	0	0	0	0	0
hsa-miR-376b-3p	0	0	0	2.49724	0	0	0	1.22083	0	3.00986	0	0	0	0	0	0	0	0	0.7738	0	1.85248	0	0	1.13674	1.89677	0	0.303397	0	0	0	0	0	0	0	0	0	0	2.39466	0	0
hsa-miR-5007-3p	0	0	0	0	0	0	0	0	0	0	0	0	0	0	0	0	0	0	0	0	0	0	0	0	0	0	0	0	0	0	0	0	0	0	0	0	0	0	0	0
hsa-miR-433-3p	0	0	0	0	0	0	0	0	0	0	0	0	0	0	0	0	0	0	0	0	0.463121	0	0	0	0	0	0	0	0	0	0	0	0	0	0	0	0	0	0	0
hsa-miR-6516-3p	0	0	0	0	0	1.85546	0	1.22083	0	0	0	0	0.745261	0	0	0	0	0	0	0	0	2.00076	0	0	0	0.672989	0.606794	0	0	0	2.23593	0	0	1.67781	0	0	0	0	0	0
hsa-miR-5195-3p	0	0	0	0	0	0	0	0	0	0	0	0	0	0	0	0	0	0	0	0	0	0	0	0	0	0	0	0	0	0	0	0	0	0	0	0	0	0	0	0
hsa-miR-623	0	0	0	0	0	0	0	0	0	0	0	0	0	0	0	0	0	0	0	0	0	0	0	0	0	0	0	0	0	0	0	0	0	0	0	0	0	0	0	0
hsa-miR-937-3p	0	0	0	0	0	0	1.66459	1.22083	0.939436	0	1.7499	0	0	1.45455	0	0	2.25169	1.57236	0.7738	1.05629	0	0.666919	1.08271	0.56837	0.632256	0.672989	0.910191	1.09659	0	0	0	0	1.45943	0	0	1.65598	0	0	0	1.6875
hsa-miR-7975	0	0	0	0	0	0.618487	0	0	0	0	0	0	0.745261	0	1.39849	0	0	0	0.7738	0	0.463121	0	0	0	0	1.34598	0	0	0	0	0	0	0	0	0	0	0	0	0	0
hsa-miR-7111-3p	0	1.34682	0	0	0	0	0	0	0	0	1.7499	0	0.745261	0	0	0	0	0	0	1.05629	0	0	0	0.56837	0	0	0.606794	0	0	0	0	0	0	0	0	0	0	0	0	0
hsa-miR-6881-3p	0	0	0	0	0	0	0.832296	0	0	0	0	0	0	0	0	0	0	0	0	0	0	0	1.08271	0	0	0	0	1.09659	0	1.26397	0	0	0	0	0	0	0	0	0	0
hsa-miR-639	0	0	0	0	0	0	0	0	0	0	0	0	0	0	0	0	0	0	0	0	0	0	0	0	0	0	0	0	0	0	0	0	0	0	0	0	0	0	0	0
hsa-miR-4790-5p	0	0	0	0	0	0	0.832296	0	0	0	0	0	0	0	1.39849	0	0	0	0	0	0.463121	0	0	0	0.632256	0	0	0	0	1.26397	0	0	0	0	0	0	0	0	0	0
hsa-miR-3181	0	0	0	0	0	0	0	0	0	0	0	0	0	1.45455	0	0	0	0	0	0	0	0	0	0	0	0	0	0	0	0	0	0	0	0	0	0	0	0	0	0
hsa-miR-517a-3p	0	0	2.23106	0	0	0	0	0	0	0	0	0	0	2.9091	0	0	0	0	0	0	0	0	0	0	0	0.672989	0	0	0	0	0	0	0	0	0	0	0	0	0	1.6875
hsa-miR-517c-3p	0	0	0	0	0	0	0	0	0	0	0	0	0	0	0	0	0	0	0	0	0	0	0	0	0	0	0.303397	0	0	0	0	0	0	0	0	0	0	0	0	0
hsa-miR-4799-5p	0	0	0	0	0.364741	0	0	0	0	0	0	0	0	0	0	0	0	0	0	0	0	0.666919	0	0	0	0	0.910191	1.09659	0	0	0	0	0	0	0	0	0	0	0	0
hsa-miR-4256	0	0	0	0	0	0	0	0	0	0	0	0	0	0	0	0	0	0	0	0	0	0	0	0	0	0	0	0	0	0	0	0	0	0	0	0	0	0	0	0
hsa-miR-4727-5p	0	0	0	0	0	0	0	0	0	0	0	0	0	0	0	0	0	0	0	0	0	0	0	0	0	0	0.303397	0	0	0	0	0	0	0	0	0	0	0	0	0
hsa-miR-6828-3p	0	0	0	0	0	0	0	0	0	0	0	0	0	0	0	0	0	0	0	0	0	0	0	0	0	0	0	0	0	0	0	0	0	0	0	0	0	0	0	0
hsa-miR-516b-5p	0	0	0	0	0	0.618487	0	0	0	0	0	0	0	0	0	0	0	0	0	0	0	0.666919	0	0	0	0	0	0	0	0	0	0	0	0	0	0	0	0	0	0
hsa-miR-3686	0	0	0	0	0	0	0	0	0	0	0	0	0	0	0	0	0	0	0	0	0	0	0	0	0	0	0	0	0	0	0	0	0	0	0	0	0	0	0	0
hsa-miR-7843-3p	0	0	0	0	0	0	0	0	0	0	0	0	0	0	0	0	0	0	0	0	0	0	0	0	0	0	0	0	0	0	0	0	0	0	0	0	0	0	0	0
hsa-miR-3616-5p	0	0	0	0	0.364741	0	0	0	0	0	0	0	0	0	0	0	0	0	0	0	0.926242	0	0	0	0	0	0	0	0	3.79191	0	0	0	0	0	0	1.22472	0	0	1.6875
hsa-miR-3672	0	0	0	0	0	0	0	0	0	0	0	0	0	0	0	0	0	0	0	0	0	0	0	0	0	0	0	0	0	0	0	0	0	0	0	0	0	0	0	0
hsa-miR-5708	0	0	0	0	0	0.618487	0	0	0	0	0	0	0	1.45455	0	0	0.750564	0	0	0	0	0	0	0.56837	0.632256	0	0	0	0	0	0	0	1.45943	0	0	0	0	0	0	0
hsa-miR-640	0	0	0	0	0	0	0	0	0	0	0	0	0	0	0	0	0	0	0	0	0	0	0	0	0	0	0	0	0	0	0	0	0	0	0	0	0	0	0	0
hsa-miR-6836-3p	0	0	0	0	0	0	0	0	0	0	0	0	0	0	0	0	0	0	0	0	0	0	0	0	0	0	0	0	0	0	0	0	0	0	0	0	0	0	0	0
hsa-miR-4737	0	0	0	0	0	0	0	0	0	0	0	0	0	0	0	0	0	0	0	0	0	0	0	0	0	0	0	0	0	0	0	0	0	0	0	0	0	0	0	0
hsa-miR-4754	0	0	0	0	0.729481	0	0	0	0	0	0	0	0	0	0	0	0	0	0	0	0	0	0	0	0	0	0	0	0	0	0	0	0	0	0	0	0	0	0	0
hsa-miR-5089-3p	0	0	0	0	0	0	0	0	0	0	0	0	0	0	0	0	0	0	0	0	0	0	0	0	0	0	0.303397	0	0	0	0	0	0	0	0	0	0	0	0	0
hsa-miR-4531	0	0	0	0	0	0	0	0	0	0	0	0	0	0	0	0	0	0	0	0	0	0	0	0	0	0	0	0	0	0	0	0	0	0	0	0	0	0	0	0
hsa-miR-620	0	0	0	0	0	0	0	0	0	0	0	0	0	0	0	0	0	0	0	0	0	0	0	0	0	0	0	0	0	0	0	0	0	0	0	0	0	0	0	0
hsa-miR-6874-5p	0	0	0	0	0	0	0.832296	0	0	0	0	0	0	0	0	0	0	0	0	0	0	0	0	0	0	0	0	0	0	0	0	0	0	0	0	0	0	0	0	0
hsa-miR-4642	0	0	0	0	0	0	0	0	0	0	0	0	0	0	0	0	0	0	0	0	0	0	0	0	0	0	0	0	0	0	0	0	0	0	0	0	0	0	0	0
hsa-miR-548s	0	0	0	0	0	0	0	0	0	0	0	0	0	0	0	0	0	0	0	0	0	0	0	0	0	0	0	0	0	0	0	0	0	0	0	0	0	0	0	0
hsa-miR-4435	0	0	0	0	0	0	0	0	0	0	0	0	0	0	0	0	0	0	0	0	0	0	0	0	0	0	0	0	0	0	0	0	0	0	0	0	0	0	0	0
hsa-miR-6810-5p	0	0	0	0	1.09422	0	0	1.22083	0	1.50493	0	0	0	1.45455	0	0	2.25169	0	0	1.05629	0.926242	0.666919	0	0.56837	1.89677	0	0.303397	1.09659	0	0	2.23593	0	1.45943	0	0	0	0	0	0	0
hsa-miR-6812-5p	0	0	0	0	0	0	0	0	0	0	0	0	0	0	0	0	0	0	0	0	0	0	0	0	0	0	0	0	0	0	0	0	0	0	0	0	0	0	0	0
hsa-miR-4701-3p	0	0	0	0	0	0	0	0	0	0	0	0	0	0	0	0	0	0	0	0	0	0	0	0	0	0	0	0	0	0	0	0	0	0	0	0	0	0	0	0
hsa-miR-1263	0	0	2.23106	0	0	0	0	0	0	0	0	0	0	0	0	0	0	0	0.7738	0	0	0	0	0	0	0	0.303397	0	0	0	0	0	0	0	0	0	0	0	0	0
hsa-miR-5587-5p	0	0	0	0	0	0	0	0	0	0	1.7499	0	0	0	0	0	0	0	0	0	0	0	0	0	0	0	0	0	0	0	0	0	0	0	0	0	0	0	0	0
hsa-miR-6843-3p	0	1.34682	0	0	0	0.618487	0.832296	0	0	0	0	0	0	0	0	0	0	1.57236	0	0	1.38936	1.33384	1.08271	0.56837	0	0	0.606794	0	0	0	0	0	0	1.67781	2.06775	0	0	0	0	0
hsa-miR-218-1-3p	0	0	0	0	0	0	0	0	0.939436	0	0	0	0	0	0	0	0	0	0.7738	0	0	0.666919	1.08271	0	0	0	0.303397	0	0	0	0	0	0	0	0	1.65598	1.22472	0	0	0
hsa-miR-568	0	0	0	0	0	0	0	0	0	0	0	0	0	0	0	0	0	0	0	0	0	0	0	0	0	0	0	0	0	0	0	0	0	0	0	0	0	0	0	0
hsa-miR-297	0	0	0	0	0	0	0	0	0	0	0	0	0	0	0	0	0	0	0	0	0	0	0	0	0	0	0	0	0	0	0	0	0	0	0	0	0	0	0	0
hsa-miR-10395-3p	0	0	0	0	0	0	0	0	0	3.00986	0	0	0	0	0	0	0	0	0	0	0	0	0	0	0	0	0	0	0	0	2.23593	0	2.91887	0	2.06775	0	1.22472	0	2.64044	0
hsa-miR-3912-5p	0	0	0	0	0.364741	0.618487	0	0	0	0	0	0	0	0	0	0	0.750564	0	0	0	0	0	0	0	0	0	0	0	0	0	0	0	0	0	0	0	0	0	0	0
hsa-miR-4433b-5p	0	0	0	0	0	0	0	0	0	0	0	0	0	0	0	0	0	0	0	0	0	0	0	0	0	0	0	0	0	0	0	0	0	0	0	0	0	0	0	0
hsa-miR-8070	0	0	0	0	0	0	0	0	0	0	0	0	0	0	0	0	0	0	0	0	0	0	0	0	0	0	0	0	0	0	0	0	0	0	0	0	0	0	0	0
hsa-miR-550b-2-5p	0	0	0	0	0	0	0	0	0	0	0	0	0	0	0	0	0	0	0	0	0	0	0	0	0	0	0	0	0	0	0	0	0	0	0	0	0	0	0	0
hsa-miR-4296	0	0	0	0	0	0	0	0	0	0	0	0	0	0	0	0	0	0	0	0	0	0	0	0	0	0	0	0	0	0	0	0	0	0	0	0	0	0	0	0
hsa-miR-4477b	0	0	0	0	0	0	0	1.22083	0	1.50493	0	0	0	0	0	0	0	0	0	1.05629	0.926242	0	0	1.13674	3.16128	1.34598	0	0	1.15159	1.26397	0	3.28035	0	0	2.06775	0	0	2.39466	2.64044	0
hsa-miR-384	0	0	0	0	0	0	0	0	0	0	0	0	0	0	0	0	0	0	0	0	0	0	0	0	0	0	0	0	0	0	0	0	0	0	0	0	0	0	0	0
hsa-miR-4263	0	0	0	0	0	0	0	0	0	0	0	0	0	0	0	0	0	0	0	0	0	0	0	0	0	0	0	0	0	0	0	0	0	0	0	0	0	0	0	0
hsa-miR-4768-5p	0	0	0	4.99448	0.729481	0	0	0	0.939436	0	0	0	0.745261	0	0	0	0.750564	0	0.7738	0	0	0	0	0	0	0	0.303397	0	0	0	0	0	0	0	0	0	0	0	0	0
hsa-miR-544a	0	0	0	0	0	0	0	0	0	0	0	0	0	0	0	0	0.750564	0	0	0	0	0	0	0	0	0	0	0	0	0	0	0	0	0	0	0	0	0	0	1.6875
hsa-miR-6875-3p	0	0	0	0	0	0	0	0	0	0	0	0	0	0	0	0	0	0	0	0	0	0	1.08271	0	0	0	0	0	0	1.26397	0	0	0	0	0	0	0	0	0	0
hsa-miR-510-3p	0	0	2.23106	2.49724	0.729481	0	0	1.22083	0	0	0	0	0	0	0	0	0	0	0.7738	0	0.926242	0	1.08271	0.56837	0	0	0	1.09659	0	2.52794	0	0	0	0	0	0	0	0	0	0
hsa-miR-4774-3p	0	0	0	0	0	0	0	0	0	0	0	0	0	0	0	0	0	0	0	0	0	0	0	0	0	0	0	0	0	0	0	0	0	0	0	0	0	0	0	0
hsa-miR-3152-5p	0	0	0	0	0	0	0	0	0	0	0	0	0	0	0	0	0	0	0	0	0	0	0	0	0	0	0	0	0	0	0	0	0	0	0	0	0	0	0	0
hsa-miR-4529-3p	0	0	0	0	0	0	0.832296	0	0	0	0	0	0	0	0	0	0	0	0	0	0	0	0	0	0	0	0	0	0	0	0	0	0	0	0	0	0	0	0	0
hsa-miR-3674	0	0	0	0	0	0	0	0	0	0	0	0	0	0	0	0	0	0	0	0	0	0	0	0	0	0	0	0	0	0	0	0	0	0	0	0	0	0	0	0
hsa-miR-4646-3p	0	0	0	0	0	0	0.832296	1.22083	0	0	1.7499	0	0.745261	0	0	0	0	0	0.7738	0	0	0	0	0	0	0	0	1.09659	0	0	0	0	0	0	0	0	1.22472	0	0	0
hsa-miR-2355-3p	0	0	0	7.49172	1.8237	0.618487	1.66459	1.22083	4.69718	1.50493	0	18.1013	2.98104	1.45455	4.19548	0	1.50113	1.57236	4.6428	7.394	0.926242	0.666919	1.08271	2.27348	3.16128	0.672989	1.51698	2.19318	2.30317	2.52794	4.47186	6.56071	1.45943	1.67781	2.06775	8.2799	2.44944	0	2.64044	5.06249
hsa-miR-6739-3p	0	0	0	0	0	0	0.832296	0	0	0	0	0	0	0	0	0	0	0	0	0	0	0	0	0	0	0	0.303397	0	0	0	0	0	0	0	0	0	0	0	0	0
hsa-miR-4446-5p	0	0	0	2.49724	0	0	0	0	0	0	0	0	0	0	0	0	0	0	0	1.05629	0	0	0	0	0	0	0	0	0	0	2.23593	0	0	0	0	0	0	0	0	0
hsa-miR-2113	0	0	0	0	0	0	0	0	0	0	0	0	0	0	0	0	0	0	0	0	0	0	0	0	0	0	0	0	0	0	0	0	0	0	0	0	0	0	0	0
hsa-miR-548d-3p	0	0	0	0	0	0	0	0	0	0	0	0	0	0	0	0	0	0	0	0	0	0	0	0	0	0	0	0	0	0	0	0	0	0	0	0	0	0	0	0
hsa-miR-548bb-3p	0	0	0	0	0	0	0	0	0	0	0	0	0	0	0	0	0	0	0	0	0	0	0	0	0	0	0	0	0	0	0	0	0	0	0	0	0	0	0	0
hsa-miR-548ac	0	0	0	0	0	0	0	0	0	0	0	0	0	0	0	0	0	0	0	0	0	0	0	0	0	0.672989	0	0	0	0	0	0	0	1.67781	0	0	1.22472	0	0	0
hsa-miR-548ae-3p	0	0	0	0	0	0	0	0	0	0	0	0	0	0	0	0	0	0	0	0	0	0	0	0	1.26451	0	0	0	0	0	0	0	0	0	0	0	0	0	0	0
hsa-miR-548aq-3p	0	1.34682	4.46212	2.49724	2.91792	3.09244	0.832296	1.22083	0	3.00986	6.9996	0	1.49052	7.27276	2.79699	0	2.25169	3.14472	2.3214	2.11257	1.38936	3.33459	2.16543	0	1.89677	1.34598	2.12378	3.28977	0	6.31984	0	0	2.91887	1.67781	6.20324	4.96794	1.22472	4.78933	5.28087	0
hsa-miR-548ah-3p	0	0	0	0	0	0	0	0	0	1.50493	0	0	0	0	0	0	0	0	0	0	0	0.666919	0	0	0	0.672989	0	0	0	0	0	0	0	0	0	0	0	0	0	0
hsa-miR-548am-3p	0	0	0	0	0	0	0	0	0	0	0	0	0	0	0	0	0.750564	0	0	0	0	0	1.08271	0	0	0	0.303397	0	0	0	0	0	0	0	0	0	0	0	0	0
hsa-miR-548j-3p	0	0	0	0	0	0	0	0	0.939436	0	0	0	0	1.45455	0	0	0	0	0	0	0	0	0	0	0	0	0.303397	0	0	1.26397	0	0	0	0	0	0	0	0	0	0
hsa-miR-548c-3p	0	1.34682	0	0	0.364741	0	0	0	0	0	1.7499	0	0	1.45455	1.39849	0	1.50113	0	0	1.05629	0.463121	0.666919	0	0.56837	0.632256	0	0.303397	0	0	0	0	0	0	0	0	0	0	0	0	0
hsa-miR-548at-3p	0	0	0	0	0	0	0	0	0	0	0	0	0	0	0	0	0	0	0	0	0	0	0	0	0	0	0	0	0	0	0	0	0	0	0	0	0	0	0	0
hsa-miR-548ay-3p	0	0	0	0	0.364741	1.85546	0.832296	2.44166	0.939436	1.50493	0	0	0	1.45455	0	0	0.750564	0	2.3214	1.05629	1.38936	0.666919	1.08271	0.56837	0	0	0.303397	0	0	0	0	3.28035	0	1.67781	0	0	0	0	0	1.6875
hsa-miR-548e-5p	0	0	0	2.49724	1.45896	1.23697	1.66459	0	1.87887	0	0	0	1.49052	1.45455	1.39849	0	0.750564	1.57236	2.3214	1.05629	0	1.33384	3.24814	1.70511	2.52902	0.672989	1.21359	1.09659	0	1.26397	0	0	0	3.35563	0	0	2.44944	2.39466	0	0
hsa-miR-548az-5p	0	1.34682	2.23106	0	1.09422	1.85546	0	0	0	0	1.7499	0	0.745261	2.9091	0	0	0	0	2.3214	1.05629	0.463121	2.00076	0	1.70511	1.89677	1.34598	0.910191	2.19318	1.15159	0	0	0	1.45943	0	0	3.31196	2.44944	2.39466	2.64044	1.6875
hsa-miR-497-3p	0	6.7341	2.23106	2.49724	1.09422	1.85546	0	1.22083	0.939436	3.00986	0	9.05067	2.23578	0	2.79699	4.20426	2.25169	12.5789	2.3214	1.05629	4.16809	0.666919	1.08271	3.97859	6.32256	4.03793	1.21359	1.09659	0	2.52794	2.23593	3.28035	0	0	0	1.65598	0	0	0	1.6875
hsa-miR-6771-3p	0	0	0	0	0	0	0	0	0	0	0	0	0	0	0	0	0	0	0	0	0	0	0	0	0	0	0	0	0	0	0	0	0	0	0	0	0	0	0	0
hsa-miR-583	0	0	0	0	0	0	0	0	0	0	0	0	0	0	0	0	0	0	0	0	0	0	0	0	0	0	0	0	0	0	0	0	0	0	0	0	0	0	0	0
hsa-miR-518b	0	0	0	2.49724	0	0	0	0	1.87887	0	0	0	0	0	0	0	1.50113	0	0.7738	0	0	0.666919	1.08271	0	0	1.34598	0	0	1.15159	0	0	0	1.45943	0	0	0	1.22472	0	0	0
hsa-miR-518d-3p	0	0	0	0	0	0	0	0	0	0	0	0	0	0	0	0	0	0	0	0	0	0	0	0	0	0	0	0	0	0	0	0	0	0	0	0	0	0	0	0
hsa-miR-518c-3p	0	0	0	0	0.364741	0	0	0	0	0	1.7499	0	0	0	0	0	0	0	2.3214	1.05629	0.463121	0	1.08271	0	0.632256	0	0.303397	0	0	0	2.23593	0	0	0	0	0	0	2.39466	0	0
hsa-miR-6768-3p	0	0	0	0	0	0	0	0	0	0	0	0	0	0	0	0	0	0	0	0	0	0	0	0	0	0	0	0	0	0	0	0	0	0	0	0	0	0	0	0
hsa-miR-548m	0	0	0	0	0	0	0	0	0	0	0	0	0	0	0	0	0	0	0	0	0	0	0	0	0	0	0	0	0	0	0	0	0	0	0	0	0	0	0	0
hsa-miR-6507-3p	0	0	0	0	0	0	0	0	0	0	0	0	0	0	0	0	0	0	0	0	0	0	0	0	0	0	0	0	0	0	0	0	0	0	0	0	0	0	0	0
hsa-miR-3609	0	0	0	0	0	0	0	0	0	0	0	0	0	0	0	0	0	0	0	0	0	0	0	0	0	0	0	0	0	0	0	0	0	0	0	0	0	0	0	0
hsa-miR-519d-3p	0	0	0	0	0	0	0	0	0	0	0	0	0	0	0	0	0	0	0	0	0	0	0	0	0	0	0	0	0	0	0	0	0	0	0	0	0	0	0	0
hsa-miR-561-3p	0	0	0	0	0	0	0	0	2.81831	0	0	0	0	0	0	0	0	0	0	0	0	0	0	0	0	2.01897	0	0	1.15159	0	0	0	0	0	0	1.65598	1.22472	0	0	0
hsa-miR-5692a	0	0	0	0	0	0	0	1.22083	0	0	0	0	0	0	0	0	0	0	0	0	0	0	0	0	0	0	0	0	1.15159	0	0	0	0	0	0	0	0	0	0	0
hsa-miR-1252-3p	0	0	0	0	0	0	0	0	0	0	0	0	0	0	0	0	0	0	0	0	0	0	0	0	0	0	0	0	0	0	0	0	0	0	0	0	0	0	0	0
hsa-miR-4694-3p	0	0	0	0	0	0	0	0	0	0	0	0	0	0	0	0	0	0	0	0	0	0	0	0	0	0	0	0	0	0	0	0	0	0	0	0	0	0	0	0
hsa-miR-7-2-3p	0	0	0	2.49724	0.364741	0	0	1.22083	0	0	0	0	0.745261	0	0	0	0	0	0	0	0.463121	0	1.08271	0	0	0	0.303397	0	0	0	0	0	0	0	0	0	1.22472	0	0	0
hsa-miR-196a-1-3p	0	5.38728	8.92424	0	5.10637	3.71092	7.49066	12.2083	7.51549	3.00986	5.2497	0	3.7263	0	5.59397	0	3.00226	0	3.0952	8.45028	1.85248	1.33384	3.24814	2.27348	3.79353	1.34598	4.24756	2.19318	4.60635	1.26397	4.47186	0	0	5.03344	0	0	1.22472	9.57866	0	1.6875
hsa-miR-6776-3p	0	0	0	0	0.364741	0.618487	0	1.22083	0.939436	0	1.7499	0	1.49052	0	1.39849	0	0	4.71708	0.7738	0	0.926242	0.666919	0	0	0	0	0	1.09659	0	0	0	0	0	0	0	1.65598	1.22472	2.39466	0	1.6875
hsa-miR-652-5p	0	2.69364	0	0	0.729481	1.23697	0.832296	0	0	1.50493	0	0	0.745261	0	2.79699	0	0	1.57236	2.3214	0	1.38936	0	1.08271	3.97859	0.632256	4.03793	2.12378	2.19318	1.15159	0	0	0	1.45943	0	0	0	1.22472	0	0	3.37499
hsa-miR-3150a-5p	0	0	0	0	0	0	0	0	0	0	0	0	0.745261	0	0	0	0	0	0	0	0	0	0	0.56837	0.632256	0	0.303397	0	0	0	0	0	0	0	0	0	0	0	0	0
hsa-miR-3150b-5p	0	0	0	0	0	0	0	0	0	0	1.7499	0	0	0	0	0	0	0	0	0	0	0	0	0	0	0	0	0	1.15159	0	0	0	0	0	0	0	0	0	0	0
hsa-miR-490-3p	0	0	0	0	0	0	0	0	0	0	0	0	0	0	0	0	0	0	0	0	0	0	0	0	0	0	0.303397	0	0	0	0	0	0	0	0	0	0	0	0	0
hsa-miR-4428	0	0	0	0	0	0	0	0	0	0	0	0	0	0	0	0	0	0	0	0	0	0	0	0	0	0	0	0	0	0	0	0	0	0	0	0	0	0	2.64044	0
hsa-miR-12118	0	0	0	0	0	0	0	0	0	0	0	0	0	0	0	0	0	0	0	0	0	0	0	0	0	0	0	0	0	0	0	0	0	0	0	0	0	0	0	0
hsa-miR-4753-5p	0	0	0	0	0	0	0	0	0	0	0	0	0	0	0	0	0	0	0	1.05629	0	0	0	0	0	0	0.303397	0	0	0	0	0	0	0	0	0	0	0	0	0
hsa-miR-4475	0	0	0	0	0	0	0	0	0	0	0	0	0	0	0	0	0	0	0	0	0	0	0	0	0	0	0	0	0	0	0	0	0	0	0	0	0	0	0	0
hsa-miR-1264	0	0	0	0	0	0	0	0	0	0	0	0	0	0	0	0	0	0	0	0	0	0	0	0	0	2.01897	0	0	0	0	0	0	0	0	0	0	0	0	0	0
hsa-miR-5197-5p	0	0	0	0	0	0	0	0	0	0	0	0	0	0	0	0	0	0	0	0	0	0	0	0	0	0	0	0	0	0	0	0	0	0	0	0	0	0	0	0
hsa-miR-8066	0	0	0	0	0	0	0	0	0	0	0	0	0	0	0	0	0	0	0	0	0	0	0	0	0	0	0	0	0	0	0	0	0	0	0	0	0	0	0	0
hsa-miR-5571-5p	0	0	0	0	0	0	0	0	0	0	0	0	0	0	0	0	0	0	0	0	0	0	0	0	0	0	0	0	0	0	0	0	0	0	0	0	0	0	0	0
hsa-miR-4731-3p	0	0	0	0	0	0	0	0	0	0	0	0	0	0	0	0	0	0	0	0	0	0	0	0	0	0	0	0	0	0	0	0	0	0	0	0	0	0	0	0
hsa-miR-603	0	0	0	0	0	0	0	0	0	0	0	0	0	0	0	0	0	0	0	1.05629	0.926242	0	0	0	0	0	0	0	0	0	0	0	0	0	0	0	0	0	0	0
hsa-miR-6768-5p	0	0	0	0	0	0	0	0	0	0	0	0	0	0	0	0	0	0	0	0	0	0	0	0	0	0	0	0	0	0	0	0	0	0	0	0	0	0	0	0
hsa-miR-4789-3p	0	0	0	0	0	0	0	0	0	0	0	0	0	0	0	0	0	0	0	0	0.463121	0	0	0	0	0	0	0	0	0	0	0	0	0	0	0	0	0	0	0
hsa-miR-3120-3p	0	0	0	0	0.364741	0	0	0	0	0	0	0	0	0	0	0	0	0	0	0	0	0	0	0	0	0	0	0	1.15159	0	0	0	0	0	0	0	0	0	0	0
hsa-miR-4700-3p	0	0	0	0	0	0	0	0	0	0	0	0	0	0	0	0	0	0	0	0	0	0	0	0	0	0	0	0	0	0	0	0	0	1.67781	0	0	0	0	0	0
hsa-miR-4438	0	0	0	0	0	0	0	0	0	0	0	0	0	0	0	0	0	0	0	0	0	0	0	0	0	0	0	0	0	0	0	0	0	0	0	0	0	0	0	0
hsa-miR-5580-3p	0	0	0	0	0	0	0	0	0	0	0	0	0	0	0	0	0	0	0	0	0	0	0	0	0	0	0	0	0	0	0	0	0	0	0	0	0	0	0	0
hsa-miR-942-3p	0	0	0	0	0	0	0	0	0	0	0	0	0	0	0	0	0	0	0	0	0	0	0	0	0	0	0	0	0	0	0	0	0	0	0	0	0	0	0	0
hsa-miR-1911-3p	0	0	0	0	0	0	0	0	0	0	0	0	0	0	0	0	0	0	0	0	0	0	0	0	0	0	0	0	0	0	0	0	0	0	0	0	0	0	0	0
hsa-miR-6753-5p	0	0	0	0	0	0	0	0	0	0	0	0	0	0	0	0	0	0	0	0	0	0	0	0	0	0	0	0	0	0	0	0	0	0	0	0	0	0	0	0
hsa-miR-7153-3p	0	0	0	0	0	0	0	0	0	0	0	0	0	0	0	0	0	0	0	0	0	0	0	0	0	0	0	0	0	0	0	0	0	0	0	0	0	0	0	0
hsa-miR-1295b-5p	0	0	0	0	0	0	0	0	0	0	0	0	0	0	0	0	0	0	0	0	0	0	0	0	0	0	0	0	0	0	0	0	0	0	0	0	0	0	0	0
hsa-miR-4640-3p	0	2.69364	2.23106	0	2.91792	5.56639	4.99377	2.44166	1.87887	6.01972	10.4994	9.05067	3.7263	8.72731	0	0	3.00226	1.57236	3.0952	2.11257	1.38936	1.33384	5.41357	1.13674	6.32256	1.34598	2.12378	5.48295	0	13.9037	11.1797	16.4018	0	5.03344	2.06775	0	7.34833	2.39466	5.28087	6.74999
hsa-miR-4655-5p	0	0	0	0	0	0	0	0	0	0	0	0	0	0	0	0	0	0	0	0	0	0	0	0	0	0	0	0	0	1.26397	0	0	0	0	0	0	0	0	0	0
hsa-miR-6800-3p	0	0	0	0	0	0.618487	0	0	0	0	0	0	0	0	0	0	0	0	0	0	0	0.666919	0	0	0.632256	0.672989	0	0	1.15159	1.26397	0	0	0	0	4.13549	0	0	2.39466	0	0
hsa-miR-6782-3p	0	0	0	2.49724	0	0.618487	0	0	0	1.50493	0	0	0	0	0	0	0	0	0	0	0.463121	0.666919	0	0	0	0	0.303397	0	0	0	0	0	0	1.67781	0	0	0	0	0	1.6875
hsa-miR-4445-3p	0	0	0	0	0	0	0	0	0	0	0	0	0	0	0	0	0	0	0	0	0	0	0	0	0	0	0	0	0	0	0	0	0	0	0	0	0	0	0	0
hsa-miR-512-5p	0	0	0	0	0	0	0	0	0	0	0	0	0	0	0	0	0	0	0	0	0	0	0	0	0	0	0	0	0	0	0	0	0	0	0	0	0	0	0	0
hsa-miR-4418	0	0	0	0	0	0	0	0	0	0	0	0	0	0	0	0	0	0	0	0	0	0	0	0	0	0	0	0	0	0	0	0	0	0	0	0	0	0	0	0
hsa-miR-6807-3p	0	0	0	0	0	0	0	0	0	0	0	0	0	0	0	0	0	0	0	0	0	0	0	0	0	0	0	0	0	0	0	0	0	0	0	0	0	0	0	0
hsa-miR-1183	0	0	0	0	0	0	0	0	0	0	0	0	0	0	0	0	0	0	0	0	0	0	0	0	0	0	0	0	0	0	0	0	0	0	0	0	0	0	0	0
hsa-miR-4318	0	0	0	0	0	0	0	0	0	0	0	0	0	0	0	0	0	0	0	0	0	0	0	0	0	0	0	0	0	0	0	0	0	0	0	0	0	0	0	0
hsa-miR-4676-3p	0	0	0	0	0	0	0.832296	1.22083	0	0	0	0	0	1.45455	0	0	0	0	0	0	0	0	0	0	0	0	0.910191	0	0	0	0	0	0	0	0	0	0	0	0	0
hsa-miR-892c-3p	0	0	0	0	1.09422	0	0	0	0	0	0	0	1.49052	1.45455	0	0	0.750564	0	0	0	0.463121	0.666919	0	0.56837	0	0	1.82038	0	0	0	0	0	0	0	0	0	1.22472	2.39466	2.64044	0
hsa-miR-374c-3p	0	0	0	0	0.364741	1.23697	0	0	0.939436	0	0	0	0	0	0	0	0	0	0	0	0.463121	0	0	0	0	0	0	0	0	0	0	0	0	0	2.06775	0	0	0	0	0
hsa-miR-4773	0	0	0	0	0	0	0	0	0	0	0	0	0	0	0	0	0	0	0	0	0	0	0	0	0	0	0	0	0	0	0	0	0	0	0	0	0	0	0	0
hsa-miR-3154	0	0	0	0	0	0	0	0	0	0	0	0	0	0	0	0	0	0	0	0	0	0	0	0	0	0	0	0	0	0	0	0	0	0	0	0	0	0	0	0
hsa-miR-3123	0	0	0	0	0	0	0	0	0	0	0	0	0	0	0	0	0	0	0	0	0	0	0	0	0	0	0	0	0	0	0	0	0	0	0	0	0	0	0	0
hsa-miR-6873-5p	0	0	0	0	0	0	0	0	0	0	0	0	0	0	0	0	0	0	0	0	0	0	0	0	0	0	0	0	0	0	0	0	0	0	0	0	0	0	0	0
hsa-miR-5586-3p	0	0	0	0	0	0	0	0	0	0	0	0	0	0	0	0	0	0	0	0	0	0	0	0	0	0	0	0	0	0	0	0	0	0	0	0	0	0	0	0
hsa-miR-5694	0	0	0	0	0	0	0	0	0	0	0	0	0	0	0	0	0	0	0	0	0.463121	0	0	0	0	0	0	0	0	0	0	0	0	0	0	0	0	0	0	0
hsa-miR-6871-3p	0	0	0	0	0	0.618487	0	0	0	0	0	0	0	0	0	0	0	0	0	0	0	0	0	0	0	0.672989	0	0	0	1.26397	0	0	0	0	0	0	0	0	0	0
hsa-miR-6165	0	0	0	0	0	0	0	0	0	0	0	0	0	0	0	0	0	0	0	0	0	0	0	0	0	0	0	0	0	0	0	0	0	0	0	0	0	0	0	0
hsa-miR-6510-5p	0	0	0	0	0	0	0	0	0	0	0	0	0	0	0	0	0	0	0	0	0	0	0	0	0	0	0	0	0	0	0	0	0	0	0	0	0	0	0	0
hsa-miR-4274	0	0	0	0	0	0	0	0	0	0	0	0	0	0	0	0	0	0	0	0	0	0	0	0	0	0	0	0	0	0	0	0	0	0	0	0	0	0	0	0
hsa-miR-4519	0	0	0	0	0	0	0	0	0	0	0	0	0	0	0	0	0	0	0	0	0	0	0	0	0	0	0	0	0	0	0	0	0	0	0	0	0	0	0	0
hsa-miR-449b-3p	0	0	0	0	0	0	0	0	0	0	0	0	0	0	1.39849	0	0	0	0	0	0	0	0	0	0	0	0	2.19318	1.15159	0	0	0	1.45943	0	0	0	0	0	0	0
hsa-miR-6858-3p	0	0	0	2.49724	0	0	0.832296	0	0	0	0	0	0.745261	0	0	0	0.750564	0	0	0	0	0	0	0	0	0.672989	0	0	0	0	0	0	0	0	0	0	0	0	2.64044	0
hsa-miR-4323	0	0	0	0	0	0	0	0	0	0	0	0	0	0	0	0	0	0	0	0	0	0	0	0	0	0	0.303397	0	0	0	0	0	0	0	0	0	0	0	0	0
hsa-miR-4687-5p	0	0	0	0	0	0	0	1.22083	0	1.50493	0	0	0	0	0	0	0	0	0	0	0	0.666919	0	0	0	0	0	0	0	1.26397	0	0	0	0	0	0	0	2.39466	0	0
hsa-miR-6746-3p	0	0	0	0	0	0	0	0	0	0	0	0	0	0	0	0	0	0	0	0	0	0	1.08271	0	0	0	0	1.09659	0	0	0	0	0	1.67781	0	0	0	0	0	0
hsa-miR-6877-3p	0	0	0	0	0	0	0	0	0	0	0	0	0	0	0	0	0	0	0	0	0	0	0	0	0	0	0	0	0	0	0	0	0	0	0	0	0	0	0	0
hsa-miR-4293	0	0	0	0	0	0	0	0	0	0	0	0	0	0	0	0	0	0	0	0	0	0	0	0	0	0	0	0	0	0	0	0	0	0	0	0	0	0	0	0
hsa-miR-7846-3p	0	0	0	0	0	0	0	0	0	0	0	0	0	0	0	0	0	0	0	0	0	0	0	0	0	0	0	0	0	0	0	0	0	0	0	0	0	0	0	0
hsa-miR-6876-5p	0	0	0	0	0	0.618487	0.832296	0	0	0	0	0	0	0	0	0	0	0	0	0	0	0	0	0	0	0	0	0	1.15159	0	0	0	0	0	0	0	0	0	0	0
hsa-miR-4476	0	0	0	0	0	0	0	0	0	0	0	0	0	0	0	0	0	0	0	0	0	0	0	0	0	0	0	0	0	0	0	0	0	0	0	0	0	0	0	0
hsa-miR-8083	0	0	0	0	0	0	0	0	0	0	0	0	0	0	0	0	0	0	0	0	0	0	0	0	0	0	0	0	0	0	0	0	0	0	0	0	0	0	0	0
hsa-miR-4695-5p	0	0	0	0	0	0	0	0	0	0	0	0	0	0	0	0	0	0	0	0	0.463121	0	0	0	0	0	0	0	0	0	0	0	0	0	0	0	0	0	0	0
hsa-miR-4433b-3p	0	0	0	0	0	0	0	0	0	0	0	0	0	0	0	0	0	0	0	0	0	0	0	0	0	0	0	0	0	0	0	0	0	0	0	0	0	0	0	0
hsa-miR-4661-3p	0	0	0	0	0	0	0	0	0	0	0	0	0	0	0	0	0	0	0	0	0	0	0	0	0	0	0	0	0	0	0	0	0	0	0	0	0	0	0	0
hsa-miR-10524-5p	0	0	0	0	0	0	0	0	0	0	0	0	0	0	0	0	0	0	0	0	0	0	0	0	0	0	0	0	0	0	0	0	0	0	0	0	0	0	0	0
hsa-miR-1265	0	0	0	0	0	0	0	0	0	0	0	0	0	0	0	0	0	0	0	0	0	0	0	0	0	0	0	0	0	0	0	0	0	0	0	0	0	0	0	0
hsa-miR-3622a-5p	0	0	4.46212	0	0.364741	0.618487	0.832296	4.88331	0.939436	1.50493	1.7499	0	0	0	1.39849	0	2.25169	0	0	1.05629	0	2.66767	1.08271	0.56837	1.26451	0	0.606794	0	0	0	2.23593	0	0	1.67781	0	0	1.22472	0	0	0
hsa-miR-6511a-5p	0	1.34682	0	0	0.364741	0	0	0	0.939436	0	0	0	0.745261	0	0	4.20426	0	0	0	0	0	0	0	0	0	0	0.303397	0	0	0	0	0	0	0	0	0	0	0	0	0
hsa-miR-6808-5p	0	0	0	0	0	0	0	0	0	0	0	0	0	0	0	0	0	0	0	0	0	0	0	0	0	0	0	0	0	0	0	0	0	0	0	0	0	0	0	0
hsa-miR-6893-5p	0	0	0	0	0	0	0	0	0	0	0	0	0	0	0	0	0	0	0	0	0	0	0	0	0	0	0	0	0	0	0	0	0	1.67781	0	0	0	0	0	0
hsa-miR-2682-5p	0	0	0	0	0	0	0	0	0	0	0	0	0	0	0	0	0	0	0	0	0	0	0	0	0	0	0	0	0	0	0	0	0	0	0	0	0	0	0	0
hsa-miR-3186-5p	0	0	0	0	0	0	0	0	0	0	0	0	0	0	0	0	0	0	0	0	0	0	0	0	0	0	0	0	0	0	0	0	0	0	0	0	0	0	0	0
hsa-miR-5584-5p	0	0	0	0	0	0	0	0	0	0	0	0	0	0	0	0	0	0	0	0	0	0	0	0.56837	0	0	0	0	0	0	0	0	0	0	0	0	0	0	0	0
hsa-miR-6750-5p	0	0	0	0	0	0	0	0	0	0	1.7499	0	0	0	0	0	0.750564	0	0.7738	0	0.463121	0	0	0	0	0	0	0	0	0	2.23593	0	0	0	0	0	0	0	0	0
hsa-miR-6822-5p	0	0	0	0	0	0.618487	0	0	0	0	0	0	0	0	0	0	0	0	0	0	0	0.666919	0	0	0	0	0.303397	1.09659	0	1.26397	0	0	0	0	0	0	0	0	0	0
hsa-miR-6760-5p	0	0	0	0	0	0	0	0	0	0	0	0	0	0	0	0	0	0	0	0	0	0	0	0	0.632256	0	0	0	0	0	0	0	0	0	0	0	0	0	0	0
hsa-miR-4756-5p	0	0	0	0	0	0	0	0	0	0	0	0	0	0	0	0	0	0	0	0	0	0	0	0	0	0	0	0	0	0	0	0	0	0	0	0	0	0	0	0
hsa-miR-1321	0	0	0	0	0	0	0	0	0	0	0	0	0.745261	0	0	0	0	0	0	0	0	0	0	0	0	0	0	0	0	0	2.23593	0	0	0	0	0	0	0	0	0
hsa-miR-4436b-3p	0	0	0	0	0	0	0	0	0	0	0	0	0	0	0	0	0	0	0	0	0	0	0	0	0	0.672989	0	0	0	2.52794	0	0	0	1.67781	0	0	0	0	0	0
hsa-miR-6879-5p	0	0	0	0	0	0	0	0	0	0	0	0	0	0	0	0	0	0	0	0	0	0	0	0	0	0	0	0	0	0	0	0	0	0	0	0	0	0	0	0
hsa-miR-6895-5p	0	0	0	0	0	0	0	0	0	0	0	0	0	0	0	0	0	0	0	0	0	0	0	0	0	0	0	0	0	0	0	0	0	0	0	0	0	0	0	0
hsa-miR-7160-3p	0	0	0	0	0	0	0	0	0	0	0	0	0	0	0	0	0	0	0	0	0	0	0	0	0	0	0	0	0	0	0	0	0	0	0	0	0	0	0	0
hsa-miR-4512	0	0	0	0	0	0	0	0	0	0	0	0	0	0	0	0	0	0	0	0	0	0	0	0	0	0	0	0	0	0	0	0	0	0	0	0	0	0	0	0
hsa-miR-5088-5p	0	0	0	0	0	0	0.832296	0	0	0	0	0	0	0	0	0	0	0	0	0	0	0	1.08271	0	0	0	0	0	1.15159	0	0	0	0	0	0	0	0	0	0	1.6875
hsa-miR-4446-3p	0	2.69364	2.23106	0	0.364741	1.23697	2.49689	1.22083	1.87887	3.00986	0	0	1.49052	0	2.79699	8.40852	0.750564	0	0	0	0.926242	0.666919	1.08271	0	1.89677	1.34598	0.303397	0	5.75793	7.58381	0	0	1.45943	0	2.06775	1.65598	0	2.39466	0	1.6875
hsa-miR-6813-5p	0	0	0	0	0	0	0	0	0	0	0	0	0	0	0	0	0	0	0	0	0	0	0	0	0	0	0	0	0	0	0	0	0	0	0	0	0	0	0	0
hsa-miR-6794-5p	0	0	0	0	0	0	0	0	0	0	0	0	0	0	0	0	0	0	0	0	0	0	0	0	0	0	0	0	0	0	0	0	0	0	0	0	0	0	0	0
hsa-miR-1178-5p	0	0	0	0	0	0	0	0	0	0	0	0	0	0	0	0	0	0	0	0	0	0	0	0	0	0	0	0	0	0	0	0	0	0	0	0	0	0	0	0
hsa-miR-3927-3p	0	0	0	0	0.364741	0	0	0	0	1.50493	0	0	0	0	0	0	0	0	0.7738	0	0	0	0	0	0	0	0	0	0	0	0	0	0	0	0	0	0	0	0	0
hsa-miR-370-5p	0	0	0	0	0	0	0	0	0	0	0	0	0	0	0	0	0	0	0	0	0	0	0	0	0	0	0	0	0	0	2.23593	0	0	0	0	0	0	0	0	0
hsa-miR-431-3p	0	0	0	0	0	0	0	2.44166	0	0	0	0	0	0	0	0	0	0	0	0	1.38936	0	1.08271	0.56837	0	0	0	0	0	0	0	0	0	0	0	1.65598	0	0	0	0
hsa-miR-12114	0	0	0	0	0	0	0	0	0	0	0	0	0	0	0	0	0	0	0	0	0	0	0	0	0	0	0	0	0	0	0	0	0	0	0	0	0	0	0	0
hsa-miR-802	0	1.34682	0	0	0.729481	1.23697	0	0	0	0	0	0	0	0	0	0	0	0	0	0	0.463121	0	0	1.70511	0	0	0	0	0	0	0	0	0	0	0	0	0	0	0	0
hsa-miR-8079	0	0	0	0	0	0	0	0	0	0	0	0	0	0	0	0	0	0	0	0	0	0	0	0	0	0	0	0	0	0	0	0	0	0	0	0	0	0	0	0
hsa-miR-8062	0	0	0	0	0	0	0	0	0	0	0	0	0	0	0	0	0	0	0	0	0	0	0	0	0	0	0	0	0	0	0	0	0	0	0	0	0	0	0	0
hsa-miR-3666	0	0	0	0	0	0	0	0	0	0	0	0	0	0	0	0	0	0	0	0	0	0	0	0	0	0	0	0	0	0	0	0	0	0	0	0	0	0	0	0
hsa-miR-301b-3p	0	1.34682	0	0	0.729481	0.618487	0.832296	0	3.75774	0	0	0	1.49052	0	0	0	1.50113	1.57236	1.5476	2.11257	0.463121	2.66767	0	0	0.632256	0.672989	1.21359	0	1.15159	2.52794	0	0	1.45943	0	2.06775	0	0	0	2.64044	1.6875
hsa-miR-4295	0	0	0	0	0	0	0	0	0	0	0	0	0	0	0	0	0	0	0	0	0	0	0	0	0	0	0	0	0	0	0	0	0	0	0	0	0	0	0	0
hsa-miR-33b-3p	0	0	0	0	0.364741	0	0	1.22083	0	0	0	0	0	0	0	0	0	0	0	0	0.463121	0	0	0	0.632256	0.672989	0	0	0	0	0	0	0	0	0	0	0	2.39466	0	0
hsa-miR-3677-5p	0	0	0	0	0	0	0	0	0	0	0	0	0	0	0	0	0	0	0	0	0	0	0	0	0	0	0	0	0	0	0	0	0	0	0	0	0	0	0	0
hsa-miR-4255	0	0	0	0	0	0	0	0	0	0	0	0	0	0	0	0	0	0	0	0	0	0	0	0	0	0	0	0	0	0	0	0	0	0	0	0	0	0	0	0
hsa-miR-5000-5p	0	1.34682	0	0	0.364741	0	0	0	0	0	0	0	0	0	0	0	0	0	0	0	0	0	0	0	0	0	0	1.09659	0	0	0	0	0	0	0	0	0	0	0	0
hsa-miR-6874-3p	0	0	0	0	0.364741	0	0	0	2.81831	0	0	0	0	0	0	0	0	0	0	1.05629	0	0.666919	1.08271	0.56837	0.632256	0	0	0	0	1.26397	2.23593	0	0	0	2.06775	1.65598	0	0	0	0
hsa-miR-4259	0	1.34682	2.23106	2.49724	0	0	0	0	0	0	0	0	0	0	0	0	0	0	0	0	0	0	0	0	0	0	0.303397	0	0	1.26397	2.23593	0	0	0	0	0	0	0	0	0
hsa-miR-4666a-3p	0	0	0	0	0	0	0	0	0	0	0	0	0	0	0	0	0	0	0	0	0	0	0	0	0	0	0	0	0	0	0	0	0	0	0	0	0	0	0	0
hsa-miR-10397-3p	0	0	0	0	0	0	0	0	0	0	0	0	0	0	0	0	0	0	0	0	0	0	0	0	0	0	0	0	0	0	0	0	0	0	0	0	0	0	0	0
hsa-miR-3651	0	0	0	0	0	0	0	0	0	0	0	0	0	0	0	0	0	0	0	0	0.926242	0	0	0	0	0	0	0	0	0	0	0	0	0	0	0	0	0	0	0
hsa-miR-3617-3p	0	0	0	0	0	0	0	0	0	0	0	0	0	0	0	0	0	0	0	0	0.463121	0	0	0	0	0	0	0	0	0	0	0	0	0	0	0	0	0	0	0
hsa-miR-217-3p	0	0	2.23106	0	0	0	0	0	0	0	0	0	0	0	0	0	0	0	0	0	0	0	0	0	0	0	0	0	0	0	0	0	0	0	0	0	0	0	0	0
hsa-miR-4800-3p	0	0	0	0	0.729481	0	0	1.22083	0	0	0	0	0	0	1.39849	0	1.50113	0	0	0	2.3156	0.666919	0	1.13674	0	0	0	0	1.15159	0	2.23593	0	0	0	0	0	2.44944	0	0	0
hsa-miR-3675-3p	0	0	0	0	0	0	0	0	0	0	0	0	0	0	0	0	0	0	0	0	0	0	0	0	0	0	0	0	0	0	0	0	0	0	0	0	0	0	0	0
hsa-miR-3126-3p	0	0	0	2.49724	0	0	0	0	0	0	0	0	0	0	0	0	0	0	0	0	0	0	0	0	0	0	0.303397	0	0	0	0	0	0	0	0	0	0	0	0	0
hsa-miR-1298-3p	0	0	0	0	0	0	0	0	0	0	0	0	0	0	0	0	0	0	0	0	0	0	0	0	0	0	0	0	0	0	0	0	0	0	0	0	0	0	0	0
hsa-miR-4757-3p	0	0	0	0	0	0	0	0	0	0	0	0	0	0	0	0	0	0	0	0	0	0.666919	0	0	0	0	0	0	1.15159	0	0	3.28035	0	0	0	0	0	0	0	0
hsa-miR-3146	0	0	0	2.49724	1.09422	0	0	0	0	0	0	0	0	0	1.39849	0	0	1.57236	0.7738	0	0.463121	0.666919	0	0.56837	0.632256	0	0	0	0	1.26397	0	0	1.45943	0	0	1.65598	0	7.18399	0	0
hsa-miR-6871-5p	0	0	0	0	0	0.618487	0	0	1.87887	0	0	0	0	1.45455	0	0	0.750564	0	0	0	0	0	0	0	0	0	0.303397	0	1.15159	0	0	0	0	0	0	0	0	0	0	0
hsa-miR-6890-5p	0	0	0	0	0	0	0	0	0	0	0	0	0	0	0	0	0	0	0	0	0	0	0	0	0.632256	0	0	0	0	0	0	0	0	0	0	0	0	0	0	0
hsa-miR-218-2-3p	0	0	0	0	0	0	0	0	0	0	0	0	0	0	0	0	0	0	0	0	0.463121	0	0	0	0	0	0	0	0	0	0	0	0	0	0	0	0	0	0	0
hsa-miR-6504-3p	0	0	0	0	0	0	0	0	0	0	0	0	0	0	0	0	0	0	0	0	0	0	0	0	0	0	0	0	0	0	0	0	0	0	0	0	0	0	0	0
hsa-miR-4272	0	0	0	0	0	0	0	0	0	0	0	0	0	0	0	0	0	0	0	0	0	0	0	0	0	0	0	0	0	0	0	0	0	0	0	0	0	0	0	0
hsa-miR-548o-3p	0	0	0	0	0	0.618487	0	0	0	0	0	0	0	0	2.79699	0	0	0	0	0	0.926242	0	0	0	1.89677	0	0	1.09659	0	0	2.23593	0	0	0	2.06775	0	2.44944	2.39466	2.64044	0
hsa-miR-6715a-3p	0	0	0	0	0.364741	0	0	0	0	0	0	0	0	0	0	0	0	0	0	0	0.463121	0	0	0.56837	0	0	0.910191	0	0	0	4.47186	0	0	0	0	0	0	0	0	0
hsa-miR-4762-5p	0	0	0	0	0.364741	0	0	0	0	0	0	0	0	0	0	0	0	0	0	0	0	0	0	0	0	0	0	0	0	0	0	0	0	0	0	0	0	0	0	0
hsa-miR-4714-3p	0	0	2.23106	0	1.45896	0	0.832296	0	0	1.50493	1.7499	0	2.98104	0	1.39849	0	1.50113	0	0.7738	1.05629	0.926242	0	0	1.70511	0.632256	3.36494	0.303397	0	0	0	0	0	1.45943	3.35563	2.06775	0	1.22472	2.39466	0	3.37499
hsa-miR-6830-5p	0	0	0	0	0.364741	0	0	0	0	0	0	0	0	0	0	0	0	1.57236	0	0	0	0	0	0	0	0	0.303397	0	0	0	0	0	0	0	0	0	0	0	0	0
hsa-miR-16-2-3p	0	2.69364	2.23106	2.49724	2.55318	2.47395	0.832296	3.66249	2.81831	0	1.7499	0	0.745261	1.45455	1.39849	4.20426	0.750564	4.71708	1.5476	2.11257	2.3156	2.00076	1.08271	1.70511	3.79353	2.69195	3.94416	1.09659	3.45476	5.05588	2.23593	3.28035	1.45943	1.67781	0	0	0	4.78933	0	0
hsa-miR-4275	0	0	0	0	0	0	0	0	0	0	0	0	0	0	0	0	0	0	0	0	0	0	0	0	0	0	0	0	0	0	0	0	0	0	0	0	0	0	0	0
hsa-miR-4733-3p	0	0	0	0	0	0	0	0	0	0	0	0	0	0	1.39849	0	0	0	0	0	0	0	0	0	1.26451	0	0	0	0	0	0	0	0	0	0	0	2.44944	0	0	0
hsa-miR-181d-3p	0	0	0	0	0	0	0	1.22083	0	0	0	0	0	0	0	0	0	1.57236	0	1.05629	0.463121	0	1.08271	1.13674	0.632256	1.34598	0.303397	0	0	0	0	0	0	0	0	0	0	0	0	1.6875
hsa-miR-6767-3p	0	0	0	0	0	0	0	0	0	0	0	0	0	0	0	0	0	0	0	0	0	0	0	0	0	0	0.303397	0	0	0	0	0	0	0	0	0	0	0	0	0
hsa-miR-6890-3p	0	0	0	0	0	0	0	0	0	0	0	0	0	0	0	0	0	0	0	0	0	0	0	0	0	0	0	0	0	0	0	0	0	0	0	0	0	0	0	0
hsa-miR-1324	0	0	0	0	0	0	0	0	0	0	0	0	0	0	0	0	0	0	0	0	0	0	0	0	0	0	0	0	0	0	0	0	0	0	0	0	0	0	0	0
hsa-miR-4494	0	0	0	0	0	0	0	0	0	0	0	0	0	0	0	0	0	0	0	0	0	0	0	0	0	0	0	0	0	0	0	0	0	0	0	0	0	0	0	0
hsa-miR-4756-3p	0	0	0	0	0	0	0	0	0	0	0	0	0	0	0	0	0	0	0	0	0	0	0	0	0	0	0	0	0	0	0	0	0	0	0	0	0	0	0	0
hsa-miR-6501-3p	0	0	0	0	0	0	0	0	0	0	0	0	0	0	0	0	0	0	0.7738	0	0	0	0	0	0	0	0.303397	0	0	0	0	0	0	0	0	0	0	0	0	0
hsa-miR-4257	0	0	0	0	0	0	0	0	0	0	0	0	0	0	0	0	0	0	0	0	0	0	0	0	0	0	0	0	0	0	0	0	0	0	0	0	0	0	0	0
hsa-miR-4691-3p	0	0	0	0	0	0	0	0	0	0	0	0	0	0	0	0	0	0	0	0	0	0	0	0	0	0	0	0	0	0	0	0	0	0	0	0	0	0	0	0
hsa-miR-4768-3p	0	0	0	0	0	0	0	0	0	0	0	0	0	0	0	0	0	0	0	0	0	0	0	0	0	0	0.303397	0	0	0	0	0	0	0	0	0	0	0	0	0
hsa-miR-3155b	0	0	0	0	0	0	0	0	0	0	0	0	0	0	0	0	0	0	0.7738	0	0	0	0	0	0	0	0	0	0	0	0	0	0	0	0	0	0	0	0	0
hsa-miR-3155a	0	0	0	0	0	0	0	0	0	0	0	0	0	0	0	0	0	0	0	0	0	0	0	0	0	0	0	0	0	0	0	0	0	0	0	0	0	0	0	0
hsa-miR-6754-5p	0	0	0	0	0	0	0	0	0	0	0	0	0	0	0	0	0	0	0	0	0	0	0	0	0	0	0	0	0	0	0	3.28035	0	0	0	0	0	0	0	0
hsa-miR-6798-5p	0	0	0	0	0	0	0	0	0	0	0	0	0	0	0	0	0	0	0	0	0	0	0	0	0	0	0	0	0	0	0	0	0	0	0	0	0	0	0	0
hsa-miR-16-1-3p	0	0	0	0	0.364741	0	0	0	0	1.50493	0	0	0	0	0	0	0	0	0	2.11257	0.463121	0	0	0	0	0	0	0	0	1.26397	0	0	0	0	2.06775	0	0	0	0	0
hsa-miR-1910-5p	0	0	0	0	0	0	0.832296	0	0	0	0	0	0	0	0	0	0.750564	0	0	0	0	0	0	0	0	0	0	0	0	0	0	0	0	0	0	0	0	2.39466	0	0
hsa-miR-5190	0	0	0	0	0	0	0	0	0	0	0	0	0	0	0	0	0	0	0	0	0	0	0	0	0	0	0	0	0	0	0	0	0	0	0	0	0	0	0	0
hsa-miR-4302	0	0	0	0	0	0	0	0	0	0	0	0	0	0	0	0	0	0	0	0	0	0	0	0	0	0	0	0	0	0	0	0	0	0	0	0	0	0	0	0
hsa-miR-935	0	0	0	2.49724	0	0	0.832296	1.22083	0	3.00986	0	0	0	1.45455	1.39849	0	1.50113	0	3.0952	1.05629	3.24185	0	1.08271	0	1.89677	0	0.606794	1.09659	4.60635	0	2.23593	0	0	0	0	1.65598	0	0	0	0
hsa-miR-4328	0	0	0	0	0	0	0	0	0	0	0	0	0	0	0	0	0	0	0	0	0	0	0	0	0	0	0	0	0	0	0	0	0	0	0	0	0	0	0	0
hsa-miR-8060	0	0	0	0	0	0	0	0	0	0	0	0	0	0	0	0	0	0	0	0	0	0	0	0	0	0	0	0	0	0	0	0	0	0	0	0	0	0	0	0
hsa-miR-490-5p	0	0	0	0	0	0	0	0	0	0	0	0	0	0	0	0	0	0	0	0	0	0	0	0	0	0	0	0	0	0	0	0	0	0	0	0	0	0	0	0
hsa-miR-10226	0	0	0	0	0	0	0	0	0	0	0	0	0	0	0	0	0	0	0	0	0	0	0	0	0	0	0	0	0	0	0	0	0	0	0	0	0	0	0	0
hsa-miR-9902	0	0	0	2.49724	0	0	0	0	0	0	0	0	0	0	0	0	0	0	0	0	0.926242	0	0	0.56837	0	0.672989	0	0	0	0	0	0	0	0	0	0	0	0	0	0
hsa-miR-488-5p	0	0	0	0	0	0	0	0	0	0	0	0	0	0	0	0	0	0	0	0	0	0	0	0	0	0	0	0	0	0	0	0	0	0	0	0	0	0	0	0
hsa-miR-4530	0	0	0	0	0	0	0	0	0	0	0	0	0	0	0	0	0	0	0	0	0	0	0	0	0	0	0	0	0	0	0	0	0	0	0	0	0	0	0	0
hsa-miR-4685-5p	0	0	0	0	0	0	0	0	0	0	0	0	0	0	0	0	0	0	0	0	0	0	0	0	0	0	0	0	0	0	0	0	0	0	0	0	0	0	0	0
hsa-miR-6884-3p	0	0	0	0	0	0	0	0	0.939436	0	0	0	0	1.45455	0	0	0	0	0	0	0	0	0	0	0.632256	0	0	1.09659	0	0	0	0	0	0	0	0	1.22472	0	0	0
hsa-miR-6872-3p	0	0	0	0	0	0	0	0	0	0	0	0	0	0	0	0	0	0	0	0	0	0	0	0	0	0	0	0	0	0	0	0	1.45943	0	0	0	0	0	0	0
hsa-miR-1224-3p	0	0	0	0	0.364741	0	0.832296	0	0	0	0	0	0	1.45455	0	0	0	0	0	0	0.463121	0	0	0	0	0.672989	0	0	0	0	0	0	0	0	0	0	0	0	0	0
hsa-miR-1915-3p	0	0	0	0	0	0	0	0	0	0	0	0	0	0	0	0	0	0	0	0	0	0	0	0	0	0	0.606794	0	1.15159	0	0	0	0	1.67781	0	3.31196	0	0	0	0
hsa-miR-4258	0	0	0	0	0	0	0	0	0	0	0	0	0	0	0	0	0	0	0	0	0	0	0	0	0	0	0	0	0	0	0	0	0	0	0	0	0	0	0	0
hsa-miR-1247-3p	0	0	0	0	0	0	0	0	0	0	0	0	0	0	0	0	0	0	0	0	0	0	0	0	0	0	0	0	0	0	0	0	0	0	0	0	0	0	0	0
hsa-miR-4783-3p	0	0	2.23106	0	1.09422	0.618487	0	0	2.81831	1.50493	1.7499	0	0.745261	0	0	4.20426	0.750564	1.57236	1.5476	2.11257	2.3156	1.33384	1.08271	1.70511	2.52902	0.672989	0.303397	1.09659	0	0	0	3.28035	0	1.67781	0	0	0	0	0	1.6875
hsa-miR-4292	0	0	0	0	0	0	0	0	0	0	0	0	0	0	0	0	0	0	0	0	0	0	0	0	0	0	0	0	0	0	0	0	0	0	0	0	0	0	0	0
hsa-miR-6791-5p	0	0	0	0	0	0	0	0	0	0	0	0	0	0	0	0	0	0	0	0	0	0.666919	0	0	0	0	0	0	1.15159	0	0	0	0	0	0	0	0	0	0	0
hsa-miR-6886-5p	0	0	0	0	0	0	0	0	0	0	0	0	0	0	0	0	0	0	0	0	0	0	0	0	0	0	0	0	0	1.26397	0	0	0	0	0	0	0	0	0	0
hsa-miR-1203	0	0	0	0	0	0	0	0	0	0	0	0	0	0	0	0	0	0	0	0	0	0	0	0	0	0	0	0	0	0	0	0	0	0	0	0	0	0	0	0
hsa-miR-6850-3p	0	0	0	0	0	0	0	0	0	0	0	0	0	0	0	0	0	0	0	0	0	0	0	0	0	0	0	0	0	0	0	0	0	0	0	0	0	0	0	0
hsa-miR-6891-3p	0	0	0	0	0	0	0	0	0	0	0	0	0	0	0	0	0	0	0.7738	0	0	0	0	0	0	0	0	0	0	0	0	0	0	0	0	0	0	0	0	0
hsa-miR-6769b-3p	0	0	2.23106	0	0.729481	1.23697	0	0	0.939436	0	0	9.05067	3.7263	2.9091	0	8.40852	0	0	1.5476	1.05629	0	2.66767	1.08271	0.56837	1.26451	0	0.606794	0	2.30317	5.05588	0	0	1.45943	0	2.06775	0	2.44944	0	0	3.37499
hsa-miR-4324	0	0	0	0	0	0	0	1.22083	0	0	0	0	0	0	0	0	0	1.57236	0	0	0	0.666919	0	0	0.632256	0	0	0	0	0	0	0	2.91887	0	0	0	0	0	2.64044	0
hsa-miR-6893-3p	0	0	0	0	0	0	0	0	0	0	0	0	0	0	0	0	0	0	0	0	0	0	0	0	0	0	0	0	0	0	0	0	0	0	0	0	0	0	0	0
hsa-miR-939-3p	0	0	0	0	0	0	0	0	0	0	0	0	0	0	0	0	0	0	0	0	0	0	0	0	0	0	0	0	0	0	0	0	0	0	0	0	0	0	0	0
hsa-miR-6852-5p	0	0	0	0	0	0.618487	0.832296	0	0	0	0	0	0	0	0	0	0	0	0	0	0.463121	0	0	0	0	0	0.606794	0	0	0	0	0	2.91887	0	0	0	0	0	0	0
hsa-miR-1914-5p	0	0	0	0	0	0	0	0	0.939436	0	0	0	0.745261	0	0	0	0	1.57236	0.7738	0	0	0	0	0.56837	0	0.672989	0.303397	0	0	0	0	0	1.45943	0	0	3.31196	1.22472	2.39466	0	3.37499
hsa-miR-1266-3p	0	0	0	0	0	0	0	0	0	1.50493	0	0	0	1.45455	0	0	0	0	0	0	0	0	0	0	0	0	0	0	0	0	0	0	0	0	0	0	0	0	0	0
hsa-miR-6078	0	0	0	0	0	0	0	0	0	0	0	0	0	0	0	0	0	0	0	0	0	0	0	0	0	0	0	0	0	0	0	0	0	0	0	0	0	0	0	0
hsa-miR-6880-3p	0	0	2.23106	0	0	0	0	0	0	0	0	0	0	0	0	0	0.750564	0	0	0	0.463121	0	0	0	0	0	0	0	0	0	0	0	1.45943	1.67781	0	0	0	0	0	0
hsa-miR-6812-3p	0	1.34682	0	0	0	0.618487	0.832296	3.66249	0.939436	3.00986	3.4998	0	0.745261	0	0	0	0	0	0.7738	0	0	0.666919	0	0	0.632256	0	0.303397	1.09659	1.15159	0	0	0	0	0	2.06775	0	0	2.39466	0	0
hsa-miR-4315	0	0	0	0	0	0	0	0	0	0	0	0	0	0	0	0	0	0	0	0	0	0	0	0	0	0	0	0	0	0	0	0	0	0	0	0	0	0	0	0
hsa-miR-4304	0	0	0	0	0	0	0	0	0	0	0	0	0	0	0	0	0	0	0	0	0	0	0	0	0	0	0	0	0	0	0	0	0	0	0	0	0	0	0	0
hsa-miR-10392-3p	0	0	0	0	0	0	0	0	0	0	0	0	0	0	0	0	0	0	0	0	0	0	0	0	0	0	0	0	0	0	0	0	0	0	0	0	0	0	0	0
hsa-miR-6746-5p	0	0	0	0	0	0	0	0	0	0	0	0	0	0	0	0	0	0	0	0	0	0	0	0	0	0	0	0	0	0	0	0	0	0	0	0	0	0	0	0
hsa-miR-5090	0	0	0	0	0	0	0	0	0	0	0	0	0	0	0	0	1.50113	0	0	0	0	0	1.08271	0	0	0	0	1.09659	0	0	0	0	0	0	0	0	0	0	0	0
hsa-miR-4746-5p	0	1.34682	0	0	0	0.618487	0	0	0	0	5.2497	0	0	0	0	0	0	0	1.5476	0	0.463121	1.33384	0	0	0	0	0	1.09659	0	0	0	0	0	0	0	3.31196	0	0	0	0
hsa-miR-6070	0	0	0	0	0	0	0	0	0	0	0	0	0	0	0	0	0	0	0	0	0	0	0	0	0	0	0	0	0	0	0	0	0	0	0	0	0	0	0	0
hsa-miR-1181	0	0	0	0	0	0	0	0	0	0	0	0	0	0	0	0	0	0	0	0	0	0	0	0	0	0	0	0	0	0	0	0	0	0	0	0	0	0	0	0
hsa-miR-4735-5p	0	0	0	0	0	0	0	0	0	0	0	0	0	0	0	0	0	0	0	0	0	0	0	0	0	0	0	0	0	0	0	0	0	0	0	0	0	0	0	0
hsa-miR-8067	0	0	0	0	0	0	0	0	0	0	0	0	0	0	0	0	0	0	0	0	0	0	0	0	0	0	0	0	0	0	0	0	0	0	0	0	0	0	0	0
hsa-miR-4305	0	0	0	0	0	0	0	0	0	0	0	0	0	0	0	0	0	0	0	0	0	0	0	0	0	0	0	0	0	0	0	0	0	0	0	0	0	0	0	0
hsa-miR-325	0	0	0	0	0	0	0	0	0	0	0	0	0	0	0	0	0	0	0	0	0	0	0	0	0	0	0	0	0	0	0	0	0	0	0	0	0	0	0	0
hsa-miR-372-5p	0	0	0	0	0	0	0	0	0	0	0	0	0	0	0	0	0	0	0	0	0	0	0	0	0	0	0	0	0	0	0	0	0	0	0	0	0	0	0	0
hsa-miR-6511b-3p	0	2.69364	0	4.99448	1.45896	0	1.66459	0	0.939436	0	0	0	1.49052	0	1.39849	4.20426	0.750564	0	2.3214	1.05629	0.926242	1.33384	2.16543	0.56837	2.52902	0	0.303397	1.09659	0	0	4.47186	0	0	1.67781	6.20324	0	2.44944	0	0	1.6875
hsa-miR-6511a-3p	0	0	2.23106	2.49724	2.18844	3.71092	3.32918	1.22083	5.63661	6.01972	1.7499	0	1.49052	2.9091	1.39849	0	1.50113	3.14472	3.0952	6.33771	2.3156	0	2.16543	1.70511	2.52902	2.01897	1.82038	2.19318	0	1.26397	2.23593	9.84106	1.45943	0	0	4.96794	1.22472	0	2.64044	1.6875
hsa-miR-6862-3p	0	0	0	0	0.364741	0	1.66459	0	0	0	0	0	0	1.45455	0	0	0.750564	0	0	0	0	0.666919	0	0	0.632256	0.672989	0	0	1.15159	1.26397	0	0	0	0	0	0	0	0	0	1.6875
hsa-miR-4330	0	0	0	0	0	0	0	0	0	0	0	0	0	0	0	0	0	0	0	0	0	0	0	0	0	0	0	0	0	0	0	0	0	0	0	0	0	0	0	0
hsa-miR-1266-5p	0	4.04046	6.69318	0	2.18844	1.85546	4.16148	2.44166	0.939436	1.50493	5.2497	0	1.49052	0	0	0	2.25169	0	3.869	2.11257	1.85248	1.33384	1.08271	2.84185	3.79353	1.34598	4.24756	2.19318	1.15159	2.52794	2.23593	3.28035	0	1.67781	2.06775	1.65598	0	14.368	2.64044	1.6875
hsa-miR-519d-5p	0	0	0	0	0	0	0	0	0	0	0	0	0	0	0	0	0	0	0	0	0	0	0	0	0	0	0	0	0	0	0	0	0	0	0	0	0	0	0	0
hsa-miR-7113-3p	0	0	0	0	0.364741	0	0	2.44166	0	0	0	0	0	0	0	0	0	0	0	0	0	0	1.08271	0	0	0	0.606794	0	0	0	0	0	0	0	2.06775	0	0	0	0	0
hsa-miR-8088	0	0	0	0	0	0	0	0	0	0	0	0	0	0	0	0	0	0	0	0	0	0	0	0	0	0	0	0	0	0	0	0	0	0	0	0	0	0	0	0
hsa-miR-520f-5p	0	0	0	0	0	0	0	0	0	0	0	0	0	0	0	0	0	0	0	0	0	0	0	0	0	0	0	0	0	0	0	0	0	0	0	0	0	0	0	0
hsa-miR-520b-5p	0	0	0	0	0	0.618487	0	0	0	0	0	0	0	0	0	0	0	0	0	0	0	0	0	0	0	0	0	0	1.15159	0	0	0	0	0	0	0	0	0	0	0
hsa-miR-517-5p	0	0	0	0	0	0	0	0	0	0	0	0	0	0	0	0	0	0	0	0	0	0	0	0	0	0	0	0	0	0	0	0	0	0	0	0	0	0	0	0
hsa-miR-3059-3p	0	0	0	0	0	0	0	0	0	0	0	0	0	0	0	0	0	0	0	0	0	0	0	0	0	0	0	0	0	0	0	0	0	0	0	0	0	0	0	0
hsa-miR-6845-3p	0	0	0	0	0	0	0	0	0	0	0	0	0	0	0	0	0	0	0	0	0	0	0	0	0	0	0	0	0	0	0	0	0	0	0	0	0	0	0	0
hsa-miR-146a-3p	0	0	4.46212	0	0.364741	0.618487	0.832296	0	0	0	0	0	0	0	0	0	0	0	0	1.05629	3.70497	0	0	0	0	0	0.303397	0	1.15159	31.5992	0	0	0	0	0	0	0	0	0	0
hsa-miR-1236-3p	0	0	0	0	0	0	0	0	0	0	0	0	0	0	0	0	0	0	0	0	0	0	0	0	0	0	0	0	0	0	0	0	0	0	0	0	0	0	0	0
hsa-miR-6730-3p	0	0	0	0	0.364741	0	0	0	0.939436	0	0	0	0.745261	2.9091	0	0	0	0	0	0	0	0.666919	0	0	0.632256	0.672989	0	0	0	0	0	0	0	0	0	0	0	0	0	0
hsa-miR-4750-3p	0	0	0	0	0	0	0	0	0	0	0	0	0	0	0	0	0	0	0	0	0	0	0	0	0	0	0	0	0	0	0	0	0	0	0	0	0	0	0	0
hsa-miR-4251	0	0	0	0	0	0	0	0	0	0	0	0	0	0	0	0	0	0	0	0	0	0	0	0	0	0	0	0	0	0	0	0	0	0	0	0	0	0	0	0
hsa-miR-4329	0	0	0	0	0	0	0	0	0	0	0	0	0	0	0	0	0	0	0	0	0	0	0	0	0	0	0	0	0	0	0	0	0	0	0	0	0	0	0	0
hsa-miR-1199-5p	0	0	0	0	0	0	0	0	0	0	0	0	0	0	0	0	0	0	0	0	0	0	0	0	0	0	0	0	0	0	0	0	0	0	0	0	0	0	0	0
hsa-miR-3151-3p	0	0	0	0	0	0	0	0	0	0	0	0	0	0	0	0	0	0	0	0	0	0	0	0	0	0	0	0	0	0	0	0	0	0	0	0	0	0	0	0
hsa-miR-4772-3p	0	0	0	2.49724	0	0	0.832296	0	0	0	0	0	0	0	0	0	0	0	1.5476	0	0	0	0	0	0	0	0.303397	0	0	1.26397	0	0	0	0	0	0	0	0	0	0
hsa-miR-3158-5p	0	0	0	0	0	0	0	0	0	0	0	0	0	0	0	0	0	0	0	0	0	0	0	0	0	0	0	0	0	0	0	0	0	0	0	0	0	0	0	0
hsa-miR-1184	0	0	0	0	0	0	0	0	0	0	0	0	0	0	0	0	0	0	0	0	0	0	0	0	0	0	0	0	0	0	0	0	0	0	0	0	0	0	0	0
hsa-miR-6068	0	0	0	0	0	0	0	0	0	0	0	0	0	0	0	0	0	0	0	0	0	0	0	0	0	0	0	0	0	0	0	0	0	0	0	0	0	0	0	0
hsa-miR-4520-5p	0	0	0	0	0	0	0	0	0	0	0	0	0	0	0	0	0	0	0	0	0	0	0	0	0	0	0	0	0	0	0	0	0	0	0	0	0	0	0	0
hsa-miR-3692-5p	0	0	0	0	0	0	0	0	0	0	0	0	0	0	0	0	0	0	0	0	0	0	0	0	0	0	0	0	0	0	0	0	0	0	0	0	0	0	0	0
hsa-miR-875-3p	0	0	0	0	0	0	0	0	0	0	0	0	0	0	0	0	0	0	0	0	0	0	0	0	0	0	0	0	0	0	0	0	0	0	0	0	0	0	0	0
hsa-miR-4638-3p	0	0	0	0	0	0	0	1.22083	0	0	0	0	0	0	0	0	0	0	0	0	0	0	0	0	0	0	0	0	0	0	0	0	0	0	0	0	0	0	0	0
hsa-miR-4720-5p	0	0	0	0	0	0	0	0	0.939436	0	0	0	0	0	0	0	0	0	0	0	0	0	0	0	0	0	0.303397	0	0	0	0	0	0	0	0	0	0	0	0	0
hsa-miR-3187-5p	0	0	0	0	0	0	0	0	0	0	0	0	0	0	0	0	0	0	0	0	0	0	0	0	0	0	0	0	0	0	0	0	0	0	0	0	0	0	0	0
hsa-miR-8089	0	0	0	0	0	0	0	0	0	0	0	0	0	0	0	0	0	0	0	0	0	0	0	0	0	0	0	0	0	0	0	0	0	0	0	0	0	0	0	0
hsa-miR-4456	0	0	0	0	0	0	0	0	0	0	0	0	0	0	0	0	0	0	0	0	0	0	0	0	0	0	0	0	0	0	0	0	0	0	0	0	0	0	0	0
hsa-miR-3120-5p	0	0	0	0	0	0	0	0	0	0	0	0	0	0	0	0	0	0	0	0	0	0	0	0	0	0	0	0	0	0	0	0	0	0	0	0	0	0	0	0
hsa-miR-6529-3p	0	0	0	0	0	0	0	0	0	0	0	0	0	0	0	0	0	0	0	0	0	0	0	0	0	0	0	0	0	0	0	0	0	0	0	0	0	0	0	0
hsa-miR-5008-3p	0	0	0	0	0	0	0	0	0	0	0	0	0	0	0	0	0	0	0	0	0	0	0	0	0	0	0	0	0	0	0	0	0	0	0	0	0	0	0	0
hsa-miR-134-3p	0	0	0	0	0	0	0	0	0	0	0	0	0	0	0	0	0	0	0	0	0	0	0	0	0	0	0	0	0	0	0	0	0	0	0	0	0	0	0	0
hsa-miR-1267	0	0	0	0	0.729481	0.618487	0	0	0	0	0	0	0	0	2.79699	0	0	0	0	0	0	0	0	0	0.632256	0	0.303397	0	0	0	0	0	1.45943	0	0	0	0	0	0	0
hsa-miR-6837-3p	0	0	0	0	0.364741	1.85546	0	0	0.939436	0	0	0	0.745261	0	0	4.20426	0	0	0	1.05629	0	2.00076	0	0	0	0	0.606794	0	0	0	0	0	0	0	0	0	0	0	0	0
hsa-miR-6790-3p	0	0	0	0	0	0	0	0	0	0	0	0	0	0	0	0	0	0	0	0	0	0	0	0	0	0	0	0	0	0	0	0	0	0	0	0	0	0	0	0
hsa-miR-2114-3p	0	0	0	0	0	0	0	0	0	0	0	0	0	0	0	0	0	0	0	0	0	0	0	0	0	0	0	0	0	0	0	0	0	0	0	0	0	0	0	0
hsa-miR-6738-5p	0	0	0	0	0	0	0	0	0	0	0	0	0	0	0	0	0	0	0	0	0	0	0	0	0	0	0	0	0	0	0	0	0	0	0	0	0	0	0	0
hsa-miR-6804-3p	0	0	0	0	0.364741	0	0	1.22083	0	0	0	0	0.745261	0	1.39849	0	0	0	0	0	0	0	0	0.56837	0	0	0	0	0	0	0	0	0	0	0	0	1.22472	0	0	0
hsa-miR-3166	0	0	0	0	0	0	0	0	0	0	0	0	0	0	0	0	0	0	0	0	0	0	0	0	0	0	0	0	0	0	0	0	0	0	0	0	0	0	0	0
hsa-miR-6836-5p	0	0	0	0	0	0	0	0	0	0	0	0	0	0	0	0	0	0	0	0	0	0	0	0	0.632256	0	0	0	0	0	0	0	0	0	0	0	0	0	0	0
hsa-miR-1909-3p	0	0	0	0	0	0	0	0	0	0	0	0	0	0	0	0	0	0	0	0	0	0	0	0	0	0	0	0	0	0	0	0	0	0	0	0	0	0	0	0
hsa-miR-4749-3p	0	1.34682	0	0	0	0	0	0	0	0	0	0	0.745261	0	1.39849	0	0	0	0	1.05629	0	0	1.08271	0	0	0	0	0	0	0	0	0	0	0	0	1.65598	0	0	0	0
hsa-miR-6869-3p	0	0	0	0	0	0	0	0	0	0	0	0	0	0	0	0	0	0	0	0	0	0	0	0	0	0	0	0	0	0	0	0	0	0	0	0	0	0	0	0
hsa-miR-2682-3p	0	0	0	0	0	0	0	0	0	0	0	0	0	0	0	0	0	0	0	0	0	0	0	0	0	0	0	0	0	0	0	0	0	0	0	0	0	0	0	0
hsa-miR-4763-5p	0	0	0	0	0	0	0	0	0	0	0	0	0	0	0	0	0	0	0	0	0	0	0	0	0	0	0	0	0	0	0	0	0	0	0	0	0	0	0	0
hsa-miR-3195	0	2.69364	0	29.9669	0.729481	5.56639	1.66459	8.5458	7.51549	6.01972	0	9.05067	2.23578	7.27276	8.39096	4.20426	1.50113	3.14472	1.5476	7.394	7.87305	0.666919	4.33086	3.41022	5.05805	18.1707	1.82038	3.28977	5.75793	2.52794	0	0	0	0	12.4065	0	0	2.39466	5.28087	3.37499
hsa-miR-6720-3p	0	0	0	0	1.09422	0	0	0	0.939436	1.50493	0	0	0.745261	1.45455	0	0	0	0	0	0	0	1.33384	0	0	0	0	0	2.19318	0	0	0	0	0	0	0	0	0	0	0	0
hsa-miR-4479	0	0	0	0	0	0	0	0	0	0	0	0	0	0	0	0	0.750564	0	0	0	0	0.666919	0	0	0	0	0	1.09659	0	0	0	0	0	0	0	0	0	0	0	0
hsa-miR-4767	0	0	0	0	0.364741	0	0	0	0	0	0	0	0	0	0	0	0	0	0	0	0	0.666919	0	0	0	0	0	0	0	0	0	0	0	0	0	1.65598	0	0	0	0
hsa-miR-3621	0	0	0	0	0	0	0	0	0	0	0	0	0	0	0	0	0	0	0	0	0	0	0	0	0	0	0	0	0	0	0	0	0	0	0	0	0	0	0	0
hsa-miR-1301-5p	0	0	0	0	0	0	0	0	0	0	0	0	0	0	0	0	0	0	0	0	0	0	0	0	0	0	0	0	0	0	0	0	0	0	0	0	0	0	0	0
hsa-miR-9851-5p	0	0	0	0	0	0	0	0	0	0	0	0	0	0	0	0	0	0	0	0	0	0	0	0	0	0	0	0	0	0	0	0	0	0	0	0	0	0	0	0
hsa-miR-1255b-5p	0	0	2.23106	0	0.729481	0.618487	1.66459	0	0	1.50493	0	0	0	0	0	0	0	3.14472	0.7738	1.05629	1.38936	1.33384	1.08271	0	0.632256	0.672989	0.303397	2.19318	1.15159	0	0	0	1.45943	0	0	0	1.22472	0	0	0
hsa-miR-1538	0	1.34682	2.23106	0	0.364741	0	0	2.44166	0	3.00986	0	0	0	0	0	0	0.750564	0	0	0	0	0.666919	0	0.56837	0.632256	1.34598	0	0	0	1.26397	0	0	0	0	0	0	0	0	0	0
hsa-miR-6789-3p	0	0	0	0	0.364741	0	0	0	0	0	0	0	0	2.9091	0	0	0	0	0	0	0.463121	0	1.08271	0	0	0	0.303397	0	1.15159	1.26397	0	0	0	0	0	3.31196	0	2.39466	0	1.6875
hsa-miR-4634	0	0	0	0	0	0	0	0	0	0	0	0	0	0	0	0	0	0	0	0	0	0	0	0	0	0	0	0	0	0	0	0	0	0	0	0	0	0	0	0
hsa-miR-10400-5p	0	1.34682	0	0	0.364741	0	1.66459	1.22083	0	3.00986	1.7499	9.05067	0.745261	1.45455	0	0	0	0	1.5476	1.05629	2.3156	1.33384	0	0	0.632256	0	0.303397	0	0	0	0	3.28035	0	0	2.06775	0	0	0	0	0
hsa-miR-1908-5p	0	0	0	4.99448	0.729481	0	1.66459	0	0.939436	0	0	0	0	0	1.39849	4.20426	3.00226	3.14472	0.7738	0	0.463121	0	1.08271	0	1.89677	1.34598	1.21359	1.09659	1.15159	0	2.23593	0	0	1.67781	0	0	2.44944	2.39466	0	0
hsa-miR-10396b-5p	0	0	0	0	0.364741	0	0	0	0	0	0	0	0	0	0	0	0	0	0	0	0	0	0	0	0	0	0.303397	0	1.15159	0	0	0	0	0	0	0	0	0	0	0
hsa-miR-3652	0	0	0	0	0	0	0	0	0	0	0	0	0	0	0	0	0	0	0	0	0	0	0	0	0	0	0	0	0	0	0	0	0	0	0	0	0	0	0	0
hsa-miR-8052	0	0	0	0	0	0	0	0	0	0	0	0	0	0	0	0	0	0	0	0	0	0	0	0	0	0	0	0	0	0	0	0	0	0	0	0	0	0	0	0
hsa-miR-6726-5p	0	0	0	0	0	0	0	0	0	0	0	0	0	0	0	0	0	0	0	0	0	0	0	0	0	0	0	0	0	1.26397	2.23593	0	0	0	0	0	0	0	0	0
hsa-miR-6862-5p	0	0	0	0	0.729481	0	0	0	0	0	0	0	0	0	1.39849	0	0	0	0	0	0	0	0	0	0.632256	0	0	0	0	0	0	0	0	0	0	0	0	0	0	0
hsa-miR-6781-5p	0	0	0	0	0	0	0	0	0	0	0	0	0	0	0	0	0	0	0	0	0	0	0	0	0	0	0	0	0	0	0	0	0	0	0	0	0	0	0	0
hsa-miR-9899	0	0	0	0	0	0	0	0	0	0	0	0	0	0	0	0	0	0	0	1.05629	0	0	0	0	0.632256	0	0	0	0	0	0	0	0	0	0	0	0	0	0	0
hsa-miR-1268b	0	0	0	0	0.364741	0.618487	0.832296	0	0	0	0	0	0	0	0	4.20426	0.750564	0	0.7738	0	0	0	0	0.56837	0	0	0.606794	1.09659	0	3.79191	0	3.28035	2.91887	0	0	0	3.67417	0	0	0
hsa-miR-4741	0	0	0	0	0	0	0	0	0	0	0	0	0	0	0	0	0	0	0	0	0	0	0	0	0	0	0	0	0	0	0	0	0	0	0	0	1.22472	0	0	0
hsa-miR-3175	0	0	0	0	0	0	0	0	0	0	0	0	0	0	0	0	0	0	0	0	0	0	0	0	0	0	0	0	0	0	0	0	0	0	0	0	0	0	0	0
hsa-miR-486-3p	0	0	0	0	0	0.618487	0	0	0	0	0	0	0	0	0	0	0	0	0	0	0	2.00076	0	0	0	0	0.303397	0	0	0	2.23593	0	0	0	0	0	0	0	0	0
hsa-miR-6845-5p	0	0	0	0	0	0	0	0	0	0	0	0	0	0	0	0	0	0	0	0	0	0	0	0	0	0	0	0	0	0	0	0	0	0	0	0	0	0	0	0
hsa-miR-6762-5p	0	0	0	0	0	0	0	0	0	0	0	0	0.745261	0	0	0	0	0	0	0	0.926242	0	0	0	0	0.672989	0	0	1.15159	0	0	0	0	0	0	0	0	0	0	0
hsa-miR-128-1-5p	0	0	2.23106	0	1.45896	0	0.832296	1.22083	1.87887	3.00986	1.7499	0	0.745261	2.9091	0	0	1.50113	0	1.5476	1.05629	2.3156	1.33384	1.08271	0.56837	1.26451	0	0.910191	1.09659	0	0	2.23593	0	0	1.67781	0	0	1.22472	0	0	0
hsa-miR-3196	0	1.34682	0	0	0	0	0	0	0	0	0	0	0	0	0	0	0	0	0	0	0	0	0	0	0	0.672989	0	0	0	0	0	0	0	0	0	0	0	0	0	0
hsa-miR-1237-5p	0	0	0	0	0	0	0	0	0	0	0	0	0	0	0	0	0	0	0	1.05629	0	0	0	0	0	0	0	0	0	0	0	0	0	0	0	0	0	0	0	0
hsa-miR-4651	0	0	0	0	0.364741	0	0	1.22083	0.939436	0	1.7499	0	0	0	0	4.20426	0	0	0	0	0	0	0	0.56837	0	0	0	0	0	0	0	0	1.45943	0	0	0	0	0	0	0
hsa-miR-197-5p	0	2.69364	2.23106	0	0.364741	0	0.832296	0	0.939436	0	1.7499	0	0.745261	0	0	4.20426	0	0	0.7738	0	0	0	2.16543	1.70511	0	0.672989	0	0	0	3.79191	0	0	0	1.67781	4.13549	0	3.67417	2.39466	2.64044	1.6875
hsa-miR-6766-5p	0	0	0	0	0	0	0	0	0	0	0	0	0	0	0	0	0	0	0	0	0	0	0	0	0	0	0	0	0	0	0	0	0	0	0	0	0	0	0	0
hsa-miR-12130	0	0	0	0	0	0	0	0	0	0	0	0	0	0	0	0	0	0	0	0	0	0	0	0	0	0	0	0	0	0	0	0	0	0	0	0	0	0	0	0
hsa-miR-9901	0	0	0	0	0	0	0	0	0	0	0	9.05067	0	0	0	0	0	0	0	0	0	0	0	0	0	0	0	0	1.15159	0	0	0	0	0	0	1.65598	0	0	0	0
hsa-miR-8071	0	0	0	0	0	0	0	0	0	0	0	0	0	0	0	0	0	0	0	0	0	0	0	0	0	0	0	0	0	0	0	0	0	0	0	0	0	0	0	0
hsa-miR-4433a-5p	0	0	0	2.49724	0	0	0	0	0	0	0	0	0.745261	0	2.79699	0	0	0	0.7738	0	1.38936	0	0	0	1.26451	0	0.606794	0	1.15159	0	0	0	2.91887	3.35563	0	0	0	0	0	0
hsa-miR-4449	0	1.34682	0	0	0	0	2.49689	2.44166	0.939436	0	5.2497	0	0.745261	0	1.39849	4.20426	0	0	0	0	0	0	0	0	0	0	0.606794	1.09659	1.15159	0	0	0	1.45943	0	6.20324	0	1.22472	0	0	0
hsa-miR-1227-3p	0	0	0	0	0	0	0	0	0	0	0	0	0	0	0	0	0	0	0	0	0	0	1.08271	0	1.26451	0	0.303397	0	0	0	0	0	0	0	0	0	0	0	0	0
hsa-miR-7847-3p	0	0	0	0	0	0	0	0	0	0	0	0	0	0	0	0	0	0	0	0	0	0.666919	0	0	0	0	0	0	0	0	0	0	0	0	0	0	0	0	0	0
hsa-miR-376b-5p	0	0	0	0	0	0	0	0	0	0	0	0	0	0	0	0	0.750564	0	0	0	0.463121	0	0	0.56837	0	0	0	0	0	0	0	0	1.45943	0	0	1.65598	0	0	0	0
hsa-miR-8056	0	0	0	0	0	0	0	0	0	0	0	0	0	0	0	0	0	0	0	0	0	0	0	0	0	0	0	0	0	0	0	0	0	0	0	0	0	0	0	0
hsa-miR-223-5p	0	0	0	0	1.09422	0	0	0	0	0	0	0	0	0	0	0	0	1.57236	0	0	1.38936	0.666919	2.16543	1.13674	1.89677	0	0.303397	0	0	13.9037	0	0	0	0	0	0	0	4.78933	0	0
hsa-miR-4711-3p	0	0	0	0	0	0	0	0	0	0	0	0	0	0	0	0	0	0	0	0	0	0	0	0	0	0	0	0	0	0	0	0	0	0	0	0	0	0	0	0
hsa-miR-10401-5p	0	0	0	2.49724	0.364741	4.9479	4.16148	6.10414	3.75774	4.51479	0	0	6.70735	1.45455	4.19548	0	0	0	0.7738	0	0.463121	2.66767	0	0	0.632256	1.34598	0.910191	1.09659	5.75793	2.52794	0	0	1.45943	1.67781	12.4065	0	1.22472	2.39466	0	5.06249
hsa-miR-124-5p	0	0	0	0	0	0	0	0	0	0	0	0	0	0	0	0	0.750564	0	0	0	0	0	0	0	0	0	0	0	0	0	0	0	0	0	0	0	0	0	0	0
hsa-miR-633	0	0	0	0	0	0	0	0	0	0	0	0	0	0	0	0	0	0	0	0	0	0	0	0	0	0	0	0	0	0	0	0	0	0	0	0	0	0	0	0
hsa-miR-524-5p	0	0	0	0	0	0	0	0	0	0	0	0	0	0	0	0	0	0	0	0	0	0	0	0	0	0	0	0	0	0	0	0	0	0	0	0	0	0	0	0
hsa-miR-520d-5p	0	0	0	0	0	0	0	0	0	0	0	0	0	0	0	0	0	0	0	0	0	0	0	0	0	0	0	0	0	0	0	0	0	0	0	0	0	0	0	0
hsa-miR-7151-3p	0	0	2.23106	0	0	0	0	0	0.939436	0	0	0	0	0	0	0	0	0	0	0	0	0	0	0	0	0	0	1.09659	0	0	0	0	0	0	0	0	0	0	0	0
hsa-miR-6798-3p	0	0	0	2.49724	0.364741	0	0	0	0.939436	0	0	0	0	0	0	0	0	0	1.5476	0	0	0.666919	0	0	0.632256	0.672989	0.303397	0	0	0	0	0	1.45943	0	0	0	0	0	0	0
hsa-miR-7848-3p	0	0	0	0	0	0	0	0	0	0	0	0	0	0	0	0	0	0	0	0	0	0	0	0	0	0	0	0	0	0	0	0	0	0	0	0	0	0	0	0
hsa-miR-3682-5p	0	0	0	0	0	0	0	0	0	0	0	0	0	0	0	0	0	0	0	0	0	0	0	0	0	0	0	0	0	0	0	0	0	0	0	0	0	0	0	0
hsa-miR-585-5p	0	0	0	0	0	0	2.49689	0	0	0	0	0	0.745261	0	0	0	0.750564	0	0	0	0.463121	0	0	0	0	0	0	0	0	0	0	0	0	0	0	0	0	0	0	0
hsa-miR-4266	0	0	0	0	0	0	0	0	0	0	0	0	0	0	0	0	0	0	0	0	0	0	0	0	0	0	0	0	0	0	0	0	0	0	0	0	0	0	0	0
hsa-miR-4278	0	0	0	0	0	0	0	0	0	0	0	0	0	0	0	0	0	0	0	0	0	0	0	0	0	0	0	0	0	0	0	0	0	0	0	0	0	0	0	0
hsa-miR-6802-5p	0	0	0	0	0.364741	0	0	0	0	0	0	0	0	0	0	0	0	0	0	0	0	0	0	0	0	0	0.303397	0	0	0	0	0	0	0	0	0	0	0	0	0
hsa-miR-921	0	0	0	0	0	0	0	0	0	0	0	0	0	0	0	0	0	0	0	0	0	0	0	0	0	0	0	0	0	0	0	0	0	0	0	0	0	0	0	0
hsa-miR-4473	0	0	0	0	0	0.618487	0	0	0	0	0	0	0	0	1.39849	0	0	0	0.7738	0	0	0	0	0	0	0	0	0	0	0	0	0	0	0	0	0	0	2.39466	0	0
hsa-miR-190a-3p	0	8.08092	0	14.9834	2.55318	4.9479	2.49689	2.44166	2.81831	6.01972	5.2497	0	2.23578	5.81821	2.79699	0	9.00677	3.14472	4.6428	4.22514	2.3156	8.00302	8.66171	2.84185	6.95481	4.71092	3.03397	1.09659	2.30317	7.58381	4.47186	6.56071	2.91887	8.38907	0	0	3.67417	7.18399	0	1.6875
hsa-miR-8074	0	0	0	0	0	0	0	0	0	0	0	0	0	0	0	0	0	0	0	0	0	0	0	0	0	0	0	0	0	0	0	0	0	0	0	0	0	0	0	0
hsa-miR-4477a	0	0	0	0	0	0	0	0	0.939436	0	0	0	0	0	0	0	0	0	0.7738	0	0	0	0	0	0	0	0	0	0	0	0	3.28035	0	0	0	0	0	0	0	0
hsa-miR-6715b-3p	0	0	0	0	0.729481	0	0	1.22083	0.939436	0	0	0	0	0	1.39849	0	0	0	0	0	0.463121	0.666919	0	1.70511	1.26451	0.672989	0	0	0	0	0	0	0	0	0	0	0	2.39466	0	1.6875
hsa-miR-520e-5p	0	0	0	0	0	0	0	0	0	0	0	0	0	0	0	0	0	0	0	0	0	0	0	0	0	0	0	0	0	0	0	0	0	0	0	0	0	0	0	0
hsa-miR-4465	0	0	0	0	0	0	0	0	0	0	0	0	0	0	0	0	0	0	0	0	0	0	0	0	0	0	0	0	0	0	0	0	0	0	0	0	0	0	0	0
hsa-miR-6794-3p	0	0	0	0	0	0	0	0	0	0	0	0	0	0	0	0	0	0	0	0	0	0	0	0	0	0	0	0	0	0	0	0	0	0	0	0	0	0	0	0
hsa-miR-181b-2-3p	0	1.34682	0	7.49172	2.91792	2.47395	0.832296	1.22083	1.87887	6.01972	1.7499	0	0.745261	0	1.39849	0	2.25169	3.14472	1.5476	0	2.77872	2.00076	1.08271	1.13674	1.26451	2.69195	1.51698	0	1.15159	1.26397	0	0	1.45943	3.35563	2.06775	0	1.22472	0	0	1.6875
hsa-miR-4276	0	0	0	0	0	0	0	0	0	0	0	0	0	0	0	0	0	0	0	0	0	0	0	0	0	0	0	0	0	0	0	0	0	0	0	0	0	0	0	0
hsa-miR-452-3p	0	0	0	0	0	0	0	0	0	0	0	0	0	0	0	0	0	0	0	0	0	0	0	0	0	0	0	0	0	0	0	0	0	0	0	0	0	0	0	0
hsa-miR-1912-5p	0	0	0	0	0	0	0	0	0	0	0	0	0	0	0	0	0	0	0	0	0.463121	0	0	0	0	0	0	0	0	0	0	0	0	0	0	0	0	0	0	0
hsa-miR-5696	0	0	2.23106	0	1.09422	0	0	0	0	1.50493	0	0	0.745261	0	0	0	0	0	0	3.16886	0	2.00076	0	1.13674	0	0	0.606794	1.09659	0	0	0	0	0	0	0	0	2.44944	2.39466	0	0
hsa-miR-520a-5p	0	0	2.23106	0	0	0	0	0	0	0	0	0	0	0	0	0	0	0	0	0	0	0	0	0	0	0.672989	0	0	0	0	0	0	0	0	0	0	0	0	0	0
hsa-miR-525-5p	0	0	0	0	0	0	0	0	0	0	0	0	0	0	0	0	0	0	0	0	0	0	0	0	0	0	0	0	0	0	0	0	0	0	0	0	0	0	0	0
hsa-miR-3156-3p	0	0	0	0	0	0	0	0	0	0	0	0	0	0	0	0	0	0	0	0	0	0	0	0	0	0	0	0	0	0	0	0	0	0	0	0	0	0	0	0
hsa-miR-6763-3p	0	0	0	0	0	0	0	0	0	0	0	0	0	0	0	4.20426	0	0	0	0	0	0	0	0	0	0	0	0	0	0	0	0	0	0	0	0	0	0	0	0
hsa-miR-6826-3p	0	0	0	2.49724	0	0	0	1.22083	0	0	0	0	0.745261	0	0	0	2.25169	0	0.7738	0	0	0	0	0	0.632256	0	0.303397	0	0	0	0	0	0	0	2.06775	0	1.22472	0	0	3.37499
hsa-miR-155-3p	0	0	0	0	0	0	0	0	0	0	0	0	0	0	0	0	0	0	0	0	0	0	0	0	0	0	0	0	0	0	0	0	0	0	0	0	0	0	0	0
hsa-miR-337-3p	0	0	0	0	0	0	0	0	1.87887	0	1.7499	0	0	0	0	0	0.750564	0	0	0	0	0	0	0	0	0	0.303397	0	0	1.26397	2.23593	3.28035	0	0	0	0	0	0	0	0
hsa-miR-6792-3p	0	0	0	0	0	0	0	0	0	0	0	0	0	0	0	0	0	0	0	0	0	0	0	0	0.632256	0	0.303397	0	0	0	0	0	0	0	0	0	0	0	0	0
hsa-miR-6749-3p	0	0	0	0	0.364741	0	0	1.22083	0.939436	0	0	0	0.745261	0	0	0	1.50113	0	0.7738	3.16886	0.926242	0	1.08271	0.56837	1.26451	0.672989	0.606794	0	0	0	0	3.28035	0	0	0	0	1.22472	0	0	0
hsa-miR-6780a-3p	0	0	0	0	0	0	0.832296	0	0	0	0	0	0	0	0	0	0	1.57236	0	0	0	0	0	0	0	0	0	0	0	0	0	0	0	0	0	0	0	0	0	0
hsa-miR-1200	0	0	0	0	0	0	0	0	0	0	0	0	0	0	0	0	0	0	0	0	0	0	0	0	0	0	0	0	0	0	0	0	0	0	0	0	0	0	0	0
hsa-miR-1343-3p	0	4.04046	2.23106	0	1.45896	1.23697	1.66459	3.66249	0	3.00986	1.7499	9.05067	0.745261	1.45455	0	0	0	3.14472	1.5476	0	1.38936	1.33384	0	0	1.26451	3.36494	1.51698	2.19318	0	1.26397	4.47186	3.28035	0	1.67781	2.06775	4.96794	1.22472	2.39466	0	1.6875
hsa-miR-4444	0	0	0	0	0.364741	0	0	0	0	0	0	0	0	0	0	0	0	0	1.5476	0	0	0	0	0	0	0	0.303397	0	0	0	0	0	0	0	0	0	0	0	0	0
hsa-miR-4665-3p	0	0	0	0	0	0	0	0	0	0	0	0	0	0	0	0	0	0	0	0	0	0	0	0	0	0	0	0	0	0	0	0	0	0	0	0	0	0	0	0
hsa-miR-1469	0	0	0	0	0	0	0	0	0	0	0	0	0	0	0	0	0	0	0	0	0	0	0	0	0	0	0	0	0	0	0	0	0	0	0	0	0	0	0	0
hsa-miR-6771-5p	0	0	0	0	0	0	0	0	0	0	0	0	0	0	0	0	0	0	0	0	0	0	0	0	0	0	0	0	0	0	0	0	0	0	0	0	0	0	0	0
hsa-miR-6727-5p	0	0	0	0	0	0.618487	0	0	0	0	0	0	0	0	0	0	0	0	0	0	0.463121	0	0	0	0	0	0	0	0	0	0	0	0	0	0	0	0	0	0	0
hsa-miR-3677-3p	0	0	0	0	0	0	0	0	0	0	0	0	0	0	0	0	0	0	0	0	0	0	0	0	0	0	0	0	0	0	0	0	0	0	0	0	0	0	0	0
hsa-miR-518f-5p	0	0	0	0	0	0	0	0	0	0	0	0	0	0	0	0	0	0	0	0	0	0	0	0	0	0	0	0	0	0	0	0	0	0	0	0	0	0	0	0
hsa-miR-526a-5p	0	0	0	0	0	0	0	0	0	0	0	0	0	0	0	0	0	0	0	0	0	0	0	0	0	0	0	0	0	0	0	0	0	0	0	0	0	0	0	0
hsa-miR-1229-3p	0	2.69364	0	2.49724	0.729481	1.85546	7.49066	0	1.87887	7.52465	6.9996	0	4.47156	0	2.79699	8.40852	4.50339	1.57236	3.0952	2.11257	0.926242	4.66843	8.66171	1.70511	4.42579	0	2.73057	3.28977	1.15159	5.05588	2.23593	9.84106	1.45943	3.35563	10.3387	4.96794	4.89889	7.18399	2.64044	3.37499
hsa-miR-6867-3p	0	0	0	0	0	0	0	0	0	0	0	0	0	0	0	0	0	0	0	0	0	0	0	0	0	0	0	0	0	0	0	0	0	0	0	0	0	0	0	0
hsa-miR-4279	0	0	0	0	0	0	0	0	0	0	0	0	0	0	0	0	0	0	0	0	0	0	0	0	0	0	0	0	0	0	0	0	0	0	0	0	0	0	0	0
hsa-miR-10399-3p	0	2.69364	2.23106	0	0	1.23697	2.49689	0	0.939436	0	0	0	0	0	1.39849	0	1.50113	3.14472	1.5476	0	3.70497	0.666919	0	5.6837	0.632256	2.01897	0.606794	1.09659	0	2.52794	0	0	0	0	2.06775	3.31196	1.22472	0	0	0
hsa-miR-4684-5p	0	0	0	0	0	0	0	0	0	0	0	0	0	0	0	0	0	0	0	0	0	0	0	0	0	0	0	0	0	0	0	0	0	0	0	0	0	0	0	0
hsa-miR-3191-5p	0	0	0	0	0	0	0	0	0	0	1.7499	0	0	0	0	0	0	0	0	0	0	0	1.08271	0	0	0	0	0	0	0	0	0	0	0	0	0	0	0	0	0
hsa-miR-3192-3p	0	0	0	0	0	0	0	0	0	0	0	0	0.745261	0	0	0	0	0	0	0	0	0	0	0	0	0	0	0	1.15159	0	0	0	0	0	0	0	0	0	0	0
hsa-miR-4314	0	0	0	0	0	0	0	0	0	0	0	0	0	0	0	0	0	0	0	0	0	0	0	0	0	0	0	0	0	0	0	0	0	0	0	0	0	0	0	0
hsa-miR-526b-5p	0	0	0	0	0.364741	0	0.832296	1.22083	0	0	0	0	0	0	0	0	0	0	0	0	0.463121	0	0	0	0	0	0	0	2.30317	0	0	0	0	0	0	0	0	0	0	0
hsa-miR-7158-3p	0	0	0	0	0	0	0	0	0	0	0	0	0	0	0	0	0	0	0	0	0	0	0	0	0	0	0	0	0	0	0	0	0	0	0	0	0	0	0	0
hsa-miR-127-5p	0	1.34682	0	0	0	1.23697	0	1.22083	0.939436	0	1.7499	0	0	0	1.39849	0	0.750564	0	0	1.05629	1.85248	0.666919	0	0.56837	1.89677	0	0.606794	0	1.15159	2.52794	0	3.28035	0	0	0	0	0	0	0	3.37499
hsa-miR-573	0	0	0	0	0	0	0	0	0	0	0	0	0	0	0	0	0	0	0	0	0	0	0	0	0	0	0	0	0	0	0	0	0	0	0	0	0	0	0	0
hsa-miR-5585-3p	0	0	0	0	0.729481	0	0.832296	0	0	1.50493	0	0	0	0	0	0	0	0	0	1.05629	0.463121	0	0	0	0	0	0.303397	0	0	0	0	0	1.45943	0	0	1.65598	0	0	0	0
hsa-miR-3136-5p	0	0	0	0	0.729481	0	0	0	0.939436	0	5.2497	0	0.745261	0	0	0	0	0	0	1.05629	0	0.666919	0	0	1.89677	0	0	1.09659	0	5.05588	0	0	1.45943	1.67781	0	0	0	0	0	0
hsa-miR-943	0	1.34682	0	2.49724	1.45896	0.618487	1.66459	0	3.75774	0	0	0	0.745261	0	1.39849	4.20426	0.750564	0	2.3214	2.11257	0.926242	2.00076	2.16543	0	0.632256	2.69195	0.303397	0	0	0	0	0	1.45943	0	0	6.62392	0	2.39466	0	5.06249
hsa-miR-3161	0	0	0	0	0	0	0	0	0	0	0	0	0	0	0	0	0	0	0	0	0	0	0	0	0	0.672989	0.606794	0	0	0	0	0	0	0	0	0	0	0	0	0
hsa-miR-518a-5p	0	0	0	0	0	0	0	0	0	0	0	0	0	0	0	0	0	0	0	0	0	0	0	0	0	0	0	0	0	0	0	0	0	0	0	0	0	0	0	0
hsa-miR-1273h-3p	0	0	0	0	0	0	0	0	0	0	0	0	0	0	0	0	0	0	0	0	0	0	0	0	0	0	0	0	0	0	0	0	0	0	0	0	0	0	0	0
hsa-miR-3678-3p	0	0	0	0	0	0	0	0	0	0	0	0	0	0	0	0	0	1.57236	0	0	0	0	0	0	0	0	0	0	0	0	0	0	0	0	0	0	0	0	0	0
hsa-miR-7156-3p	0	0	0	0	0	0	0	0	0	0	0	0	0	0	0	0	0	0	0	0	0	0	0	0	0	0	0	0	0	0	0	0	0	0	0	0	0	0	0	0
hsa-miR-6511b-5p	0	0	0	0	0	0	0	0	0	0	0	0	0	0	0	0	0	0	0	0	0	0	0	0	0	0	0	0	0	0	0	0	0	0	0	0	0	0	0	0
hsa-miR-12121	0	0	0	0	0	0	0	0	0	0	0	0	0	0	0	0	0	0	0	0	0	0	0	0	0	0	0	0	0	0	0	0	0	0	0	0	0	0	0	0
hsa-miR-3972	0	0	0	0	0	0	0	0	0	0	0	0	0	0	0	0	0	0	0	0	0	0	0	0	0	0	0	0	0	0	0	0	0	0	0	0	0	0	0	0
hsa-miR-4659a-5p	0	0	0	0	0	0	0	0	0	0	0	0	0	0	0	0	0	0	0	0	0	0	0	0	0	0	0	0	0	0	0	0	0	0	0	0	0	0	0	0
hsa-miR-3157-3p	0	1.34682	0	0	0	0	0	1.22083	0	0	0	0	0	0	0	0	0	0	0	1.05629	0	0	0	0	0	0	0	0	0	0	0	0	0	0	0	0	0	0	0	0
hsa-miR-6514-3p	0	0	0	0	0	0	0	1.22083	0	0	0	0	0	0	0	0	0	0	0.7738	0	0	0	0	0.56837	0.632256	0.672989	0.606794	0	1.15159	1.26397	0	0	0	0	0	0	0	0	0	0
hsa-miR-8058	0	0	0	0	0	0	0	0	0	0	0	0	0	0	0	0	0	0	0	0	0	0	0	0	0	0	0	0	0	0	0	0	0	0	0	0	0	0	0	0
hsa-miR-4309	0	0	0	0	0	0	0	0	0	0	0	0	0	0	0	0	0	0	0	0	0	0	0	0	0	0	0	0	0	0	0	0	0	0	0	0	0	0	0	0
hsa-miR-432-3p	0	0	0	0	0	0	0	0	0	0	0	0	0	0	0	0	0	0	0	0	0	0	0	0	0	0	0	0	0	0	0	0	0	0	0	0	0	0	0	0
hsa-miR-7150	0	0	0	0	0	0	0	0	0	0	0	0	0	0	0	0	0	0	0	0	0	0	0	0	0	0	0	0	0	0	0	0	0	0	0	0	0	0	0	0
hsa-miR-6878-3p	0	0	0	0	0	0	0	0	0	0	0	0	0	0	0	0	0	0	0	0	0	0	0	0	0	0	0	0	0	0	0	0	0	0	0	0	0	0	0	0
hsa-miR-4730	0	0	0	0	0	0	0	0	0	0	0	0	0	0	0	0	0	0	0	0	0	0	0	0	0	0	0	0	0	0	0	0	0	0	0	0	0	0	0	0
hsa-miR-6770-3p	0	1.34682	0	0	0	0	0	0	0	0	0	0	0	0	0	0	0	0	0	1.05629	0.926242	0	0	0	0	0	0	0	1.15159	0	0	0	0	0	0	0	0	0	0	0
hsa-miR-4298	0	0	0	0	0	0	0	0	0	0	0	0	0	0	0	0	0	0	0	0	0	0	0	0	0	0	0	0	0	0	0	0	0	0	0	0	0	0	0	0
hsa-miR-6788-5p	0	0	0	0	0	0	0	0	0	0	0	0	0	0	0	0	0	0	0	0	0	0	0	0	0	0	0	0	0	0	0	0	0	1.67781	0	0	0	0	0	0
hsa-miR-6779-5p	0	0	0	0	0	0	0	0	0	0	0	0	0	0	0	0	0	0	0	0	0	0	1.08271	0	0	0	0.303397	0	0	0	2.23593	0	0	0	0	0	0	0	0	0
hsa-miR-1273h-5p	0	0	0	0	0	0	0	0	0	0	0	0	0	0	0	0	0	0	0	0	0	0	0	0	0	0	0	0	0	0	0	0	0	0	0	0	0	0	2.64044	0
hsa-miR-3689a-3p	0	0	0	0	0	0	0	0	0	0	0	0	0	0	0	0	0	0	0	0	0	0	0	0	0	0	0	0	0	0	0	0	0	0	0	0	0	0	0	0
hsa-miR-3689b-3p	0	0	0	0	0	0	0	0	0	0	0	0	0	0	0	0	0	0	0	0	0	0	0	0	0	0	0	0	0	0	0	0	0	0	0	0	0	0	0	0
hsa-miR-10400-3p	0	0	0	0	0	0	0	0	0	0	0	0	0	0	0	0	0	0	0	0	0	0	0	0	0	0	0	0	0	0	0	0	0	0	0	0	0	0	0	0
hsa-miR-4674	0	0	0	0	0	0	0	0	0	0	0	0	0	0	0	0	0	0	0	0	0	0	0	0	0	0	0	0	0	0	0	0	0	0	0	0	0	0	0	0
hsa-miR-3150a-3p	0	0	0	0	0	0	0.832296	0	0	0	0	0	0	0	0	0	0	0	0	0	0.926242	0	0	0	0	0	0	1.09659	0	0	0	0	0	0	0	0	0	0	0	0
hsa-miR-6763-5p	0	0	0	0	0.364741	0	0	0	0.939436	1.50493	0	0	0	0	0	0	0	0	0	0	0	0	1.08271	0.56837	0	0.672989	0.606794	0	0	1.26397	4.47186	0	0	0	0	0	1.22472	0	0	0
hsa-miR-4665-5p	0	0	0	0	0	0	0	1.22083	0.939436	1.50493	0	0	0.745261	0	0	0	0	0	0	0	0	0	0	0	0	0	0.303397	0	0	1.26397	0	0	0	0	0	0	0	0	0	0
hsa-miR-7109-5p	0	0	0	0	0	0	0.832296	0	0.939436	0	0	0	0	0	0	0	0	0	0	0	0	0	0	0	0	0	0	1.09659	0	0	0	0	0	0	0	0	0	0	0	0
hsa-miR-6803-5p	0	0	0	0	0	0	0	0	0	0	0	0	0	0	0	0	0	0	0	0	0	0	0	0	0	0	0	0	0	0	0	0	0	0	0	0	0	0	0	0
hsa-miR-3170	0	0	0	0	0	0	0	0	0	0	0	0	0	0	0	0	0	0	0	1.05629	0	0	0	0	0	0.672989	0.303397	0	0	0	0	0	0	0	0	0	0	0	0	0
hsa-miR-6736-5p	0	0	2.23106	0	0	0	0	0	0	0	0	0	0	0	0	0	0	0	0	0	0	0	0	0.56837	0	0	0	0	0	0	2.23593	0	1.45943	0	0	0	0	0	0	0
hsa-miR-4507	0	0	2.23106	0	0.364741	0	0	0	0	0	0	0	0.745261	0	0	0	0.750564	0	0	0	0	0	0	0	0	0	0	0	0	0	0	0	0	0	0	0	0	0	0	0
hsa-miR-150-3p	0	0	0	0	0	0	0	0	0	0	0	0	0	0	0	0	0	0	0	0	0	0	0	0	0	0	0	0	0	0	0	0	0	0	0	0	0	0	0	0
hsa-miR-2054	0	0	0	0	0	0	0	0	0	0	0	0	0	0	0	0	0	0	0	0	0	0	0	0	0	0	0	0	0	0	0	0	0	0	0	0	0	0	0	0
hsa-miR-675-3p	0	0	0	0	0.364741	0	0	0	0	0	0	0	0	0	0	0	0.750564	0	0	0	0	0	0	0	0.632256	0	0	0	0	1.26397	0	0	0	0	0	0	0	0	0	0
hsa-miR-4322	0	0	0	0	0	0	0	0	0	0	0	0	0	0	0	0	0	0	0	0	0	0	0	0	0	0	0	0	0	0	0	0	0	0	0	0	0	0	0	0
hsa-miR-4265	0	0	0	0	0	0	0	0	0	0	0	0	0	0	0	0	0	0	0	0	0	0	0	0	0	0	0	0	0	0	0	0	0	0	0	0	0	0	0	0
hsa-miR-7702	0	0	0	0	0	0	0	0	0	0	0	0	0	0	0	0	0	0	0	0	0	0	0	0	0	0	0	0	0	0	0	0	0	0	0	0	0	0	0	0
hsa-miR-8061	0	0	0	0	0	0	0	0	0	0	0	0	0	0	0	0	0	0	0	0	0	0	0	0	0	0	0	0	0	0	0	0	0	0	0	0	0	0	0	0
hsa-miR-6083	0	0	0	0	0	0	0	0	0	0	0	0	0	0	0	0	0	0	0	0	0	0	0	0	0	0	0	0	0	0	0	0	0	0	0	0	0	0	0	0
hsa-miR-491-3p	0	1.34682	0	0	0	0.618487	0	1.22083	0	0	0	0	0	0	0	4.20426	0	0	0	1.05629	1.38936	1.33384	0	0	1.89677	0	0	2.19318	1.15159	0	0	0	1.45943	0	0	0	0	2.39466	0	0
hsa-miR-3180-5p	0	0	0	0	0	0	0	0	0	0	0	0	0	0	0	0	0	0	0	0	0	0	0	0	0	0	0.303397	0	0	0	0	0	0	0	0	0	0	0	0	0
hsa-miR-3679-3p	0	0	0	0	0	0.618487	1.66459	0	0	0	0	0	0.745261	0	0	4.20426	0	0	0.7738	0	0	0.666919	0	0	0	0.672989	0	0	0	0	0	0	0	0	2.06775	0	0	0	0	0
hsa-miR-718	0	0	0	0	0	0	0	0	0	0	0	0	0	0	0	0	0	0	0	0	0	0	0	0	0	0	0	0	0	0	0	0	0	0	0	0	0	0	0	0
hsa-miR-4664-3p	0	0	0	0	0.364741	0.618487	0	0	0	1.50493	1.7499	0	0	0	0	0	1.50113	0	0	1.05629	0.463121	0	0	0.56837	0.632256	0	0.303397	0	0	2.52794	0	0	0	0	0	0	0	0	0	0
hsa-miR-1238-3p	0	0	0	0	0.364741	0.618487	0	2.44166	0	1.50493	1.7499	0	1.49052	0	0	0	0	0	0	0	0	0	0	0.56837	0	0	0.303397	0	0	0	0	0	0	0	0	0	0	0	0	0
hsa-miR-4762-3p	0	0	0	0	0	0	0.832296	0	0	0	0	0	0	0	0	0	0	1.57236	0	0	0	0	0	0	0	0	0	1.09659	1.15159	0	0	0	0	0	0	0	0	0	0	0
hsa-miR-6738-3p	0	0	0	0	0	0	0	0	0	0	0	0	0	0	0	0	0	0	0	0	0	0	0	0	0	0	0	0	0	0	0	0	0	0	0	0	0	0	0	0
hsa-miR-578	0	0	2.23106	0	0	0	0	0	0	0	0	0	0	0	0	0	0	0	0	0	0	0	0	0	0	0.672989	0	0	0	0	0	0	0	0	0	0	0	0	0	0
hsa-miR-8081	0	0	0	0	0	0	0	0	0	0	0	0	0	0	0	0	0	0	0	0	0	0	0	0	0	0	0	0	0	0	0	0	0	0	0	0	0	0	0	0
hsa-miR-4776-3p	0	0	0	0	0	0	0	0	0	0	0	0	0	0	0	0	0	0	0	0	0	0	0	0	0	0	0	0	0	0	0	0	0	0	0	0	0	0	0	0
hsa-miR-5004-3p	0	0	0	0	0	0	0	0	0	0	0	0	0	0	0	0	0	0	0	0	0	0	0	0	0	0	0	0	0	0	0	0	0	0	0	0	0	0	0	0
hsa-miR-12133	0	0	0	0	0	0	0	0	0	0	0	0	0	0	0	0	0	0	0	0	0	0	0	0	0	0	0	0	0	0	0	0	0	0	0	0	0	0	0	0
hsa-miR-887-5p	0	0	0	0	0.364741	0	0	0	0	0	0	0	1.49052	0	0	0	0	0	0	1.05629	0.926242	0	0	0.56837	0	0	0.606794	0	0	0	0	0	0	0	2.06775	0	0	0	0	0
hsa-miR-4260	0	0	0	0	0	0	0	0	0	0	0	0	0	0	0	0	0	0	0	0	0	0	0	0	0	0	0	0	0	0	0	0	0	0	0	0	0	0	0	0
hsa-miR-659-3p	0	1.34682	0	0	0	0	0	0	0	0	0	0	0	0	0	0	0	0	0	0	0.463121	0	0	0	0	0	0	0	0	0	0	0	0	1.67781	0	0	0	0	0	0
hsa-miR-8055	0	0	0	0	0	0	0	0	0	0	0	0	0	0	0	0	0	0	0	0	0	0	0	0	0	0	0	0	0	0	0	0	0	0	0	0	0	0	0	0
hsa-miR-548ad-3p	0	0	0	0	0	0	0	0	0	0	0	0	0	0	0	0	0	0	0	0	0	0	0	0	0	0	0	0	0	0	0	0	0	0	0	0	0	0	0	0
hsa-miR-4668-3p	0	0	0	0	0.364741	0	0	0	0.939436	0	0	0	0	0	0	0	0	0	0	0	0	0	0	0	0	0	0	0	0	0	0	0	0	0	0	0	0	0	0	0
hsa-miR-3662	0	0	0	0	0	0	0	0	0	0	0	0	0	0	0	0	0	0	0	0	0	0	0	0	0	0	0	0	0	0	0	0	0	0	0	0	0	0	0	0
hsa-miR-4311	0	0	0	0	0	0	0	0	0	0	0	0	0	0	0	0	0	0	0	0	0	0	0	0	0	0	0	0	0	0	0	0	0	0	0	0	0	0	0	0
hsa-miR-518a-3p	0	0	0	0	0	0	0	0	0	0	0	0	0	0	0	0	0	0	0	0	0	0	0	0	0	0	0	0	0	0	0	0	0	0	0	0	0	0	0	0
hsa-miR-526a-3p	0	0	0	0	0	0	0	0	0	0	0	0	0	0	0	0	0	0	0	0	0	0	0	0	0	0	0	0	0	0	0	0	0	0	0	0	0	0	0	0
hsa-miR-518f-3p	0	0	0	0	0	0	0	0	0.939436	0	0	0	0	0	0	0	0	0	0	0	0	0	0	0	0	0	0	0	0	1.26397	0	0	0	0	0	0	0	0	2.64044	0
hsa-miR-548aq-5p	0	1.34682	0	0	0.364741	0	0	0	0	0	0	0	0	0	0	0	0	0	0	0	0	0	0	0	0	0	0.303397	0	0	0	0	0	0	0	0	0	0	0	0	0
hsa-miR-8054	0	0	0	0	0	0	0	0	0	0	0	0	0	0	0	0	0	0	0	0	0	0	0	0	0	0	0	0	0	0	0	0	0	0	0	0	0	0	0	0
hsa-miR-526b-3p	0	0	0	0	0	0	0	0	0	0	0	0	0	0	0	0	0	0	0	0	0	0	0	0	0	0	0	0	0	0	0	0	0	0	0	0	0	0	0	0
hsa-miR-614	0	0	0	0	0	0	0	0	0	0	0	0	0	0	0	0	0	0	0	0	0	0	0	0	0	0	0	0	0	0	0	0	0	0	0	0	0	0	0	0
hsa-miR-523-3p	0	0	0	0	0	0	0	0	0	0	0	0	0	0	0	0	0	0	0	0	0	0	0	0	0	0	0	0	0	0	0	0	0	0	0	0	0	0	0	0
hsa-miR-337-5p	0	2.69364	0	2.49724	1.09422	2.47395	0	0	2.81831	1.50493	0	0	0	0	0	0	0	0	0	1.05629	5.09433	0	0	0	1.26451	0	0.303397	0	1.15159	1.26397	0	0	1.45943	0	4.13549	0	0	0	0	3.37499
hsa-miR-4511	0	0	0	0	0.364741	0	0.832296	0	0	0	0	0	0	0	0	0	0.750564	1.57236	0	0	0	1.33384	0	0	0	0	0.910191	0	0	0	0	0	0	0	0	0	0	0	0	0
hsa-miR-6507-5p	0	0	0	0	0	0	0	0	0	0	0	0	0	0	0	0	2.25169	0	0	0	0	0	0	0	0	0	0	0	0	0	0	0	0	0	0	0	0	0	0	0
hsa-miR-8087	0	0	0	0	0	0	0	0	0	0	0	0	0	0	0	0	0	0	0	0	0	0	0	0	0	0	0	0	0	0	0	0	0	0	0	0	0	0	0	0
hsa-miR-4426	0	0	0	0	0	0	0	0	0	0	0	0	0	0	0	0	0	0	0	0	0	0	0	0	0	0	0	0	0	0	0	0	0	0	0	0	0	0	0	0
hsa-miR-4647	0	0	0	0	0	0	0	0	0	0	0	0	0	0	0	0	0	0	0	0	0	0	0	0	0	0	0	0	0	0	0	0	0	0	0	0	0	0	0	0
hsa-miR-6796-3p	0	0	0	0	0	0	0.832296	0	0	0	0	0	0	0	0	0	0	0	0	0	0	0	0	0	0	0	0	0	0	1.26397	0	0	0	0	0	0	0	0	0	0
hsa-miR-8080	0	0	0	0	0	0	0	0	0	0	0	0	0	0	0	0	0	0	0	0	0	0	0	0	0	0	0	0	0	0	0	0	0	0	0	0	0	0	0	0
hsa-miR-6816-3p	0	0	0	0	0	0	0	0	0	0	0	0	0	0	0	0	0	0	0	0	0	0	0	0	0	0	0	0	0	0	0	0	0	0	0	0	0	0	0	0
hsa-miR-3714	0	0	0	0	0	0	0	0	0	0	0	0	0	0	0	0	0	0	0	0	0	0	0	0	0	0	0	0	0	0	0	0	0	0	0	0	0	0	0	0
hsa-miR-525-3p	0	0	0	0	0	0	0	0	0	0	0	0	0	0	0	0	0	0	0	0	0	0	0	0	0	0	0	0	0	0	0	0	0	0	0	0	0	0	0	0
hsa-miR-524-3p	0	0	0	0	0	0	0	0	0	0	0	0	0	0	0	0	0	0	0	0	0	0	0	0	0	0	0	0	0	0	0	0	0	0	0	0	0	0	0	0
hsa-miR-373-3p	0	0	0	0	0	0	0	0	0	0	0	0	0	1.45455	0	0	0	0	0	0	0	0	0	0	0	0.672989	0	0	0	0	0	0	1.45943	0	0	0	0	0	0	0
hsa-miR-12117	0	0	0	0	0	0	0	0	0	0	0	0	0	0	0	0	0	0	0	0	0	0	0	0	0	0	0	0	0	0	0	0	0	0	0	0	0	0	0	0
hsa-miR-595	0	0	0	0	0	0	0	0	0	0	0	0	0	0	0	0	0	0	0	0	0	0	0	0	0	0	0	0	0	0	0	0	0	0	0	0	0	0	0	0
hsa-miR-495-5p	0	0	0	0	0.364741	0.618487	0	0	0	0	0	0	0	0	0	0	0	0	0.7738	0	0.463121	0	0	0	0	0	0	0	0	0	0	0	0	0	0	0	0	0	0	0
hsa-miR-6082	0	0	0	0	0	0	0	0	0	0	0	0	0	0	0	0	0	0	0	0	0	0	0	0	0	0	0	0	0	0	0	0	0	0	0	0	0	0	0	0
hsa-miR-8084	0	0	0	0	0	0	0	0	0	0	0	0	0	0	0	0	0	0	0	0	0	0	0	0	0	0	0	0	0	0	0	0	0	0	0	0	0	0	0	0
hsa-miR-5583-3p	0	0	0	0	0	0	0	0	0	0	0	0	0	0	0	0	0	0	0	0	0	0	0	0	0	0	0	0	0	1.26397	0	0	0	0	0	0	0	0	0	0
hsa-miR-3610	0	0	0	0	0	0	0	0	0	0	0	0	0	0	0	0	0	0	0	0	0	0	0	0	0	0	0	0	0	0	0	0	0	0	0	0	0	0	0	0
hsa-miR-10523-5p	0	0	0	0	0	0	0	0	0	0	0	0	0	0	0	0	0	0	0	0	0	0	0	0	0	0	0	0	0	0	0	0	0	0	0	0	0	0	0	0
hsa-miR-7849-3p	0	0	0	0	0	0	0	0	0	0	0	0	0	0	0	0	0	0	0	0	0	0	0	0	0	0	0	0	0	0	0	0	0	0	0	0	0	0	0	0
hsa-miR-4643	0	0	0	0	0	0	0	0	0	0	0	0	0	0	0	0	0	0	0	0	0	0	0	0	0	0	0	0	0	0	0	0	1.45943	0	0	0	0	0	0	0
hsa-miR-602	0	0	0	0	0	0	0	0	0	0	0	0	0	0	0	0	0	0	0	0	0	0	0	0	0	0	0	0	0	0	0	0	0	0	0	0	0	0	0	0
hsa-miR-4704-5p	0	0	0	0	0	0	0	0	0	0	0	0	0	0	0	0	0	0	0	0	0	0	0	0	0	0	0	0	0	0	0	0	0	0	0	0	0	0	0	0
hsa-miR-4797-5p	0	0	0	0	0	0	0	0	0	0	0	0	0	0	0	0	0	0	0	0	0	0	0	0	0	0	0	0	0	0	0	0	0	0	0	0	0	0	0	0
hsa-miR-4262	0	0	0	0	0	0	0	0	0	0	0	0	0	0	0	0	0	0	0	0	0	0	0	0	0	0	0	0	0	0	0	0	0	0	0	0	0	0	0	0
hsa-miR-4523	0	0	0	0	0	0	0	0	0	0	0	0	0	0	0	0	0.750564	0	0	0	0.463121	0	1.08271	0	0	0	0	0	0	0	0	0	0	0	0	0	0	0	0	0
hsa-miR-619-3p	0	0	0	0	0	0	0	0	0	0	0	0	0	0	0	0	0	0	0	0	0	0	0	0	0	0	0	0	0	0	0	0	0	0	0	0	0	0	0	0
hsa-miR-3680-5p	0	0	0	0	0	0	1.66459	0	0	0	0	0	0	0	0	0	0	0	0	0	0	0	0	0	0	0	0	0	0	0	0	0	0	0	0	0	0	0	0	0
hsa-miR-888-3p	0	0	0	0	0	0	0	0	0	0	0	0	0	0	1.39849	0	0	0	1.5476	0	1.85248	0.666919	0	0.56837	0	0	1.51698	1.09659	0	0	0	0	0	0	0	0	1.22472	0	2.64044	0
hsa-miR-3654	0	0	0	0	0	0	0	0	0	0	0	0	0	0	0	0	0	0	0	0	0	0	0	0	0	0	0.303397	0	0	0	0	0	0	0	0	0	0	0	0	0
hsa-miR-12126	0	0	0	0	0	0	0	0	0	0	0	0	0	0	0	0	0	0	0	0	0	0	0	0	0	0	0	0	0	0	0	0	0	0	0	0	0	0	0	0
hsa-miR-5680	0	0	2.23106	0	0.364741	0	0	0	0	0	0	0	0	0	0	0	0.750564	0	0	0	1.85248	0	0	0	0.632256	2.01897	0.303397	0	0	0	0	0	0	0	4.13549	0	0	0	0	0
hsa-miR-4524b-3p	0	0	0	0	0	0	0	0	0	0	0	0	0	0	0	0	0	0	0	0	0	0	0	0	0	0	0	0	0	0	0	0	0	0	0	0	0	0	0	0
hsa-miR-4463	0	0	0	2.49724	0	0	0	0	0	0	0	0	0	1.45455	0	0	0	0	0	0	0	0	0	0	0	0	0	0	0	1.26397	0	0	0	0	0	0	0	0	0	0
hsa-miR-6529-5p	0	0	0	0	0	0	0	0	0	0	0	0	0	0	0	0	0	0	0	0	0	0	0	0	0	0	0	0	0	0	0	0	0	0	0	0	0	0	0	0
hsa-miR-6859-5p	0	0	2.23106	0	0.729481	3.09244	0.832296	0	0.939436	1.50493	0	0	0.745261	1.45455	2.79699	0	0.750564	0	2.3214	2.11257	1.85248	0.666919	2.16543	1.13674	0	1.34598	0.606794	1.09659	0	2.52794	2.23593	3.28035	0	1.67781	2.06775	1.65598	0	0	0	1.6875
hsa-miR-3908	0	0	0	0	0	0	0	0	0	0	0	0	0	0	0	0	0	0	0	0	0	0	0	0	0	0	0	0	0	0	0	0	0	0	0	0	0	0	0	0
hsa-miR-4690-5p	0	0	0	0	0	0	0	0	0	0	0	0	0	0	0	0	0	0	0	0	0	0	0	0	0	0	0	0	0	0	0	0	0	0	0	0	0	0	0	0
hsa-miR-4676-5p	0	0	0	0	0	0	0	0	0	0	0	0	0	0	0	0	0	0	0	0	0	0	0	0	0	0	0	0	0	0	0	0	0	0	0	0	0	0	0	0
hsa-miR-575	0	0	0	0	0	0	0	0	0	0	0	0	0	0	0	0	0	0	0	0	0	0	0	0	0	0	0	0	0	0	0	0	0	0	0	0	0	0	0	0
hsa-miR-6769a-3p	0	0	0	0	0	0.618487	0	0	0	0	0	0	0	0	0	0	0	0	0	0	0	0	0	0	0	0	0	0	0	0	0	0	0	0	0	0	0	0	0	0
hsa-miR-4538	0	0	0	0	0	0	0	0	0	0	0	0	0	0	0	0	0	0	0	0	0	0	0	0	0	0	0	0	0	0	0	0	0	0	0	0	0	0	0	0
hsa-miR-4453	0	0	0	0	0	0	0	0	0	0	0	0	0	0	0	0	0	0	0	0	0	0	0	0	0	0	0	0	0	0	0	0	0	1.67781	0	0	0	0	0	0
hsa-miR-208a-5p	0	0	0	0	0	0	0	0	0	0	0	0	0	0	0	0	0	0	0	0	0	0	0	0	0	0	0	0	0	0	0	0	0	0	0	0	0	0	0	0
hsa-miR-4496	0	0	0	0	0	0	0	0	0	0	0	0	0	0	0	0	0	0	0	0	0	0	0	0	0	0	0	0	0	0	0	0	0	0	0	0	0	0	0	0
hsa-miR-12124	0	0	0	0	0	0	0	0	0	0	0	0	0	0	0	0	0	0	0	0	0	0	0	0	0	0	0	0	0	0	0	0	0	0	0	0	0	0	0	0
hsa-miR-1910-3p	0	0	0	0	0	0	0	0	0	0	0	0	0	0	0	0	0	0	0	0	0	0	0	0	0	0	0	0	0	0	0	0	0	0	0	0	0	0	0	0
hsa-miR-4478	0	0	0	0	0	0	0	0	0	0	0	0	0	0	0	0	0	0	0	0	0	0	0	0	0	0	0	0	0	0	0	0	0	0	0	0	0	0	0	0
hsa-miR-3929	0	0	0	0	0	0	0	0	0	0	0	0	0	0	0	0	0	0	0	0	0	0	0	0	0	0	0	0	0	0	0	0	0	0	0	0	0	0	0	0
hsa-miR-7843-5p	0	0	0	0	0	0	0	0	0	0	0	0	0	0	0	0	0	0	0	0	0	0	0	0	0	0	0	0	0	0	0	0	0	0	0	0	0	0	0	0
hsa-miR-4632-5p	0	0	0	0	0	0	0	0	0	0	0	0	0	0	0	0	0	0	0	0	0	0	0	0	0	0	0	0	0	0	0	0	0	0	2.06775	0	0	0	0	0
hsa-miR-4761-3p	0	0	0	0	0	0	0	0	0	0	0	0	0	0	0	0	0	0	0	0	0	0	0	0	0	0	0	0	0	0	2.23593	0	0	0	0	0	0	0	0	0
hsa-miR-1182	0	0	0	0	0	0	0	0	0	0	0	0	0	0	0	0	0	0	0	0	0	0	0	0	0	0	0	0	0	0	0	0	0	0	0	0	0	0	0	0
hsa-miR-329-5p	0	0	0	0	0	0.618487	0	0	0	0	0	0	0	0	0	0	0	0	0	0	0	0	0	0	0	0	0	0	0	0	0	0	0	0	0	1.65598	0	0	0	0
hsa-miR-515-3p	0	0	0	0	0	0	0	0	0	0	0	0	0	0	0	0	0	0	0	0	0	0	0	0	0	0	0	0	0	0	0	0	0	0	0	0	0	0	0	0
hsa-miR-6849-5p	0	0	0	0	0	0	0	0	0	0	0	0	0	0	0	0	0	0	0	0	0	0	0	0	0	0	0	0	0	0	0	0	0	0	0	0	0	0	0	0
hsa-miR-1296-3p	0	0	0	0	0	0	0	0	0	0	0	0	0	0	0	0	0	0	0	0	0	0	0	0	0	0	0	0	0	0	0	0	0	0	0	0	0	0	0	0
hsa-miR-4280	0	0	0	0	0	0	0	0	0	0	0	0	0	0	0	0	0	0	0	0	0	0	0	0	0	0	0	0	0	0	0	0	0	0	0	0	0	0	0	0
hsa-miR-3168	0	0	0	0	0	1.23697	0	0	0	0	0	0	0.745261	0	0	4.20426	0	0	0.7738	0	0	0	0	0	1.26451	0	0	2.19318	0	0	0	0	0	1.67781	0	0	0	0	5.28087	1.6875
hsa-miR-3074-3p	0	0	2.23106	0	0.364741	0.618487	0.832296	1.22083	0	0	0	0	0	0	1.39849	0	0	1.57236	0	1.05629	0	0	0	2.84185	1.26451	0	0.910191	0	0	0	0	0	1.45943	3.35563	0	0	0	2.39466	0	0
hsa-miR-6074	0	0	0	0	0	0	0	0	0	0	0	0	0	0	0	0	0	0	0	0	0	0	0	0	0	0	0	0	0	0	0	0	0	0	0	0	0	0	0	0
hsa-miR-7151-5p	0	0	0	0	0	0	0	0	0	0	0	0	0	0	0	0	0	0	0	0	0	0	0	0	0	0	0	0	0	0	0	0	0	0	0	0	0	0	0	0
hsa-miR-6866-3p	0	1.34682	2.23106	2.49724	1.09422	0.618487	0	0	0	0	3.4998	0	1.49052	0	0	0	1.50113	0	2.3214	1.05629	0	1.33384	0	0.56837	0.632256	0.672989	1.51698	1.09659	0	1.26397	0	0	0	1.67781	4.13549	1.65598	0	0	0	0
hsa-miR-1285-5p	0	0	0	0	0	0	0	0	0	0	0	0	0	0	0	0	0	1.57236	0.7738	0	0	0	1.08271	0.56837	0	0.672989	0	0	0	2.52794	0	0	0	0	2.06775	0	0	0	0	0
hsa-miR-556-5p	0	0	0	0	0.364741	0.618487	0	0	0	0	0	9.05067	0	0	1.39849	0	0.750564	4.71708	0	0	0	0.666919	2.16543	1.13674	0	0.672989	0.910191	0	1.15159	2.52794	2.23593	3.28035	0	0	0	3.31196	2.44944	0	0	0
hsa-miR-1272	0	0	0	0	0	0	0	0	0	0	0	0	0	0	0	0	0	0	0	0	0	0	0	0	0	0	0	0	0	0	0	0	0	0	0	0	0	0	0	0
hsa-miR-1322	0	0	0	0	0	0	0	0	0	0	0	0	0	0	0	0	0	0	0	0	0	0	0	0	0	0	0	0	0	0	0	0	0	0	0	0	0	0	0	0
hsa-miR-4787-3p	0	1.34682	0	2.49724	1.09422	0	3.32918	1.22083	1.87887	0	1.7499	0	3.7263	2.9091	0	0	1.50113	1.57236	0	1.05629	0	0	1.08271	1.13674	1.89677	0	0.910191	2.19318	2.30317	1.26397	0	0	0	3.35563	0	1.65598	1.22472	0	0	3.37499
hsa-miR-758-5p	0	0	0	0	0	0	0	0	0	0	0	0	0	0	0	0	0	0	0	0	0	0	0	0	0	0	0	0	0	0	0	0	0	0	0	0	0	0	0	1.6875
hsa-miR-12129	0	0	0	0	0	0	0	0	0	0	0	0	0	0	0	0	0	0	0	0	0	0	0	0	0	0	0	0	0	0	0	0	0	0	0	0	0	0	0	0
hsa-miR-3919	0	0	0	0	0	0	0	0	0	0	0	0	0	0	0	0	0	0	0	0	0	0	0	0	0	0	0	0	0	0	0	0	0	0	0	0	0	0	0	0
hsa-miR-759	0	0	0	0	0	0	0	0	0	0	0	0	0	0	0	0	0	0	0	0	0	0	0	0	0	0	0	0	0	0	0	0	0	0	0	0	0	0	0	0
hsa-miR-1288-5p	0	0	0	0	0	0	0	0	0	0	0	0	0	0	0	0	0	0	0	0	0	0	0	0	0	0	0	0	0	0	0	0	0	0	0	0	0	0	0	0
hsa-miR-922	0	0	0	0	0	0	0	0	0	0	0	0	0	0	0	0	0	0	0	0	0	0	0	0	0	0	0	0	0	0	0	0	0	0	0	0	0	0	0	0
hsa-miR-761	0	0	0	0	0	0	0	0	0	0	0	0	0	0	0	0	0	0	0	0	0	0	0	0	0	0	0	0	0	0	0	0	0	0	0	0	0	0	0	0
hsa-miR-4310	0	0	0	0	0	0	0	0	0	0	0	0	0	0	0	0	0	0	0	0	0	0	0	0	0	0	0	0	0	0	0	0	0	0	0	0	0	0	0	0
hsa-miR-4690-3p	0	4.04046	0	0	0.364741	0	0	1.22083	0	0	0	0	0	1.45455	0	0	1.50113	0	0	1.05629	0.463121	0.666919	0	0.56837	0	1.34598	0.303397	0	0	0	2.23593	3.28035	1.45943	0	0	0	0	0	2.64044	0
hsa-miR-4436a	0	0	0	0	0	0	0	0	0	0	0	0	0	0	0	0	0	0	0	0	0	0	0	0	0	0	0	0	0	0	0	0	0	0	0	0	0	0	0	0
hsa-miR-4269	0	0	0	0	0	0	0	0	0	0	0	0	0	0	0	0	0	0	0	0	0	0	0	0	0	0	0	0	0	0	0	0	0	0	0	0	0	0	0	0
hsa-miR-211-3p	0	0	0	0	0	0	0	0	0	0	0	0	0	0	0	0	0	0	0	0	0	0	0	0	0	0	0	0	0	0	0	0	0	0	0	0	0	0	0	0
hsa-miR-764	0	0	0	0	0	0	0	0	0	0	0	0	0	0	0	0	0	0	0	0	0	0	0	0	0	0	0	0	0	0	0	0	0	0	0	0	0	0	0	0
hsa-miR-3129-5p	0	0	0	0	0	0.618487	0	0	0.939436	0	0	0	0	1.45455	0	0	0.750564	0	0	0	0	0	0	0	0	0	0.606794	0	0	0	2.23593	3.28035	0	0	0	0	0	0	0	1.6875
hsa-miR-5693	0	0	0	0	0	0	0	0	0	0	0	0	0	0	0	0	0	0	0	0	0	0	0	0	0	0	0	0	0	0	0	0	0	0	0	0	0	0	0	0
hsa-miR-4277	0	0	0	0	0	0	0	0	0	0	0	0	0	0	0	0	0	0	0	0	0	0	0	0	0	0	0	0	0	0	0	0	0	0	0	0	0	0	0	0
hsa-miR-4289	0	0	0	0	0	0	0	0	0	0	0	0	0	0	0	0	0	0	0	0	0	0	0	0	0	0	0	0	0	0	0	0	0	0	0	0	0	0	0	0
hsa-miR-186-3p	0	2.69364	4.46212	4.99448	2.91792	1.85546	5.82607	3.66249	0.939436	3.00986	1.7499	0	4.47156	5.81821	0	0	4.50339	0	7.738	4.22514	0.463121	4.66843	4.33086	4.54696	2.52902	4.71092	4.55095	3.28977	1.15159	1.26397	6.70779	3.28035	2.91887	10.0669	0	6.62392	1.22472	4.78933	5.28087	5.06249
hsa-miR-6840-3p	0	0	0	0	0	0	0	0	0	0	0	0	0	0	0	0	0	0	0	0	0	0.666919	0	0	1.26451	0	0	0	0	0	0	0	0	0	0	0	0	0	0	0
hsa-miR-4707-5p	0	0	0	0	0	0	0	0	0	0	0	0	1.49052	0	0	0	0	0	0	0	0	0	0	1.13674	1.26451	0	0	0	0	0	0	0	0	0	0	0	0	0	0	0
hsa-miR-5587-3p	0	0	0	0	0	0	0	0	0.939436	0	0	0	0	0	0	0	0	0	0	0	0.463121	0	0	0	0	0	0.303397	0	0	0	0	0	0	0	0	0	0	0	0	0
hsa-miR-4740-3p	0	0	0	0	0	0	0	0	0	0	0	0	0	0	0	0	0	0	0	0	0	0	0	0	0	0	0	0	0	0	0	0	0	0	0	0	0	0	0	0
hsa-miR-1471	0	0	0	0	0	0	0	0	0	0	0	0	0	0	0	0	0	0	0	0	0	0	0	0	0	0	0	0	0	0	0	0	0	0	0	0	0	0	0	0
hsa-miR-1470	0	0	0	0	0	0	0	0	0	0	0	0	0	0	0	0	0	0	0	0	0	0	0	0	0	0	0	0	0	0	0	0	0	0	0	0	0	0	0	0
hsa-miR-2276-5p	0	0	0	0	0	0.618487	0	0	0	1.50493	0	9.05067	0	0	0	0	1.50113	1.57236	0	0	0	0	0	0	0.632256	0	0.606794	0	0	0	0	0	0	0	0	0	0	0	0	0
hsa-miR-4732-3p	0	0	0	0	0	0	0	0	0	0	0	0	0	0	0	0	0	0	0	0	0	0	0	0	0	0	0	0	0	0	0	0	0	0	0	0	0	0	0	0
hsa-miR-4442	0	0	0	0	0	0	0	0	0	0	0	0	0	0	0	0	0	0	0	0	0	0	0	0	0	0	0	0	0	0	0	0	0	0	0	0	0	0	0	0
hsa-miR-6784-5p	0	0	0	0	0	0	0	0	0	0	0	0	0	0	0	0	0	0	0	0	0	0	0	0	0	0	0	0	0	1.26397	0	0	0	0	0	0	0	0	0	0
hsa-miR-3927-5p	0	0	0	0	0	0	0	0	0	0	0	0	0	0	0	0	0	0	0	0	0	0	0	0	0	0	0	0	0	0	0	0	0	0	0	0	0	0	0	0
hsa-miR-4254	0	0	0	0	0	0	0	0	0	0	0	0	0	0	0	0	0	0	0	0	0	0	0	0	0	0	0	0	0	0	0	0	0	0	0	0	1.22472	0	0	0
hsa-miR-320a-5p	0	0	0	0	0	0	0.832296	0	0	0	0	0	0	0	0	0	0	1.57236	0	0	0	0.666919	0	0	0	0	0	0	1.15159	0	0	0	0	3.35563	0	1.65598	1.22472	0	0	0
hsa-miR-551a	0	0	0	0	0.364741	0	0.832296	0	0	0	0	0	0.745261	0	0	0	0.750564	0	0	0	0.463121	0	0	0.56837	0	0	1.21359	0	1.15159	1.26397	0	0	1.45943	0	0	0	1.22472	0	0	0
hsa-miR-375-5p	0	1.34682	0	4.99448	0	0.618487	0	0	0.939436	0	0	0	0	0	0	0	1.50113	3.14472	0.7738	0	0.463121	0	0	0	1.89677	0.672989	0.303397	0	0	0	0	0	0	0	2.06775	0	0	0	0	0
hsa-miR-4431	0	0	0	0	0	0	0	0	0	0	0	0	0	0	0	0	0	0	0	0	0	0	0	0	0	0	0	0	0	0	0	0	0	0	0	0	0	0	0	0
hsa-miR-611	0	0	0	0	0	0	0	0	0	0	0	0	0	0	0	0	0	0	0	0	0	0	0	0	0	0	0	0	0	0	0	0	0	0	0	0	0	0	0	0
hsa-miR-10392-5p	0	0	0	0	0	0	0	0	0	0	0	0	0	0	0	0	0	0	0	0	0	0	0	0	0	0	0	0	0	0	0	0	0	0	0	0	0	0	0	0
hsa-miR-6125	0	0	0	0	0	0	0	0	0	0	0	0	0	0	0	0	0	0	0	0	0	0	0	0	0	0	0	0	0	0	0	0	0	0	0	0	0	0	0	0
hsa-miR-5739	0	0	0	0	0	0	0	0	0	0	0	0	0	0	0	0	0	0	0	0	0	0	0	0	0	0	0	0	0	0	0	0	0	0	0	0	0	0	0	0
hsa-miR-4285	0	0	0	0	0	0	0	0	0	0	0	0	0	0	0	0	0	0	0	0	0	0	0	0	0	0	0	0	0	0	0	0	0	0	0	0	0	0	0	0
hsa-miR-4787-5p	0	0	0	0	0	0	0	0	0	0	0	0	0	0	0	0	0	0	0	0	0	0	0	0	0	0	0.303397	0	0	0	0	0	0	0	0	0	0	0	0	0
hsa-miR-598-5p	0	0	0	0	0	0.618487	0	0	0	0	0	0	0	0	0	0	0	0	0	0	0	0	0	0	0	0	0	0	0	0	0	0	0	0	0	0	0	0	0	1.6875
hsa-miR-6786-5p	0	0	0	0	0	0	0	0	0	0	0	0	0	0	0	0	0	0	0	0	0	0	0	0	0	0	0	0	0	0	0	0	0	0	0	0	0	0	0	0
hsa-miR-4521	0	1.34682	0	0	1.09422	3.09244	1.66459	1.22083	2.81831	1.50493	5.2497	0	0.745261	2.9091	1.39849	0	1.50113	1.57236	3.869	1.05629	3.70497	2.00076	1.08271	3.41022	1.26451	2.69195	2.12378	0	2.30317	0	0	3.28035	0	1.67781	4.13549	1.65598	2.44944	0	0	1.6875
hsa-miR-138-1-3p	0	4.04046	0	0	5.83585	3.09244	12.4844	3.66249	5.63661	6.01972	10.4994	9.05067	8.19787	4.36366	0	0	2.25169	3.14472	3.869	6.33771	4.16809	1.33384	12.9926	2.84185	0.632256	2.69195	3.64076	5.48295	3.45476	2.52794	2.23593	3.28035	1.45943	8.38907	0	9.93588	3.67417	2.39466	2.64044	0
hsa-miR-554	0	0	0	0	0	0	0	0	0	0	0	0	0	0	0	0	0	0	0	0	0	0	0	0	0	0	0	0	0	0	0	0	0	0	0	0	0	0	0	0
hsa-miR-4518	0	0	0	0	0	0	0	0	0	0	0	0	0	0	0	0	0	0	0	0	0	0	0	0	0	0	0	0	0	0	0	0	0	0	0	0	0	0	0	0
hsa-miR-6870-3p	0	0	0	0	0	1.23697	0	0	0	0	3.4998	0	0.745261	0	0	0	0	1.57236	0	0	0	0	0	0	0	0	0	1.09659	0	1.26397	0	0	0	0	0	0	0	0	0	0
hsa-miR-4469	0	0	0	0	0.364741	0	0.832296	0	0	0	0	0	0.745261	0	0	0	0	0	0	0	0	0.666919	0	0	0	0	0	0	0	0	0	3.28035	0	1.67781	0	0	0	0	0	0
hsa-miR-3917	0	0	0	0	0	0	0	0	0	0	0	0	0	0	0	0	0	0	0	0	0	0	0	0	0	0	0	0	0	0	0	0	0	0	0	0	0	0	0	0
hsa-miR-301b-5p	0	0	0	0	0	0	0	0	1.87887	0	0	0	0.745261	0	0	0	0	0	0	0	0	0	0	0	0	0	0.606794	0	0	0	0	0	0	0	0	0	0	0	0	0
hsa-miR-4539	0	0	0	0	0	0	0	0	0	0	0	0	0	0	0	0	0	0	0	0	0	0	0	0	0	0	0	0	0	0	0	0	0	0	0	0	0	0	0	0
hsa-miR-4526	0	0	0	0	0	0	0.832296	0	0	0	0	0	0.745261	0	0	0	0	0	0	1.05629	0	0	0	0.56837	0	0	0	0	1.15159	0	0	0	0	0	0	0	0	0	0	0
hsa-miR-4502	0	0	0	0	0	0	0	0	0	0	0	0	0	0	0	0	0	0	0	0	0	0	0	0	0	0	0	0	0	0	0	0	0	0	0	0	0	0	0	0
hsa-miR-3130-3p	0	0	2.23106	0	0	0	0	0	0	1.50493	0	0	1.49052	0	2.79699	0	2.25169	0	0.7738	0	0.463121	0	0	0	0	1.34598	0.606794	0	1.15159	1.26397	0	3.28035	0	0	0	1.65598	0	0	0	0
hsa-miR-4734	0	0	0	0	0	0	0	0	0	0	0	0	0	0	0	0	0	0	0	0	0	0	0	0	0	0	0	0	0	0	0	0	0	0	0	0	0	0	0	0
hsa-miR-612	0	0	0	0	0	0	0	0	0	0	0	0	0	0	0	0	0	0	0	0	0	0	0	0	0	0	0	0	0	0	0	0	0	0	0	0	0	0	0	0
hsa-miR-4486	0	0	0	0	0	0	0	0	0	0	0	0	0	0	0	0	0	0	0	0	0	0	0	0	0	0	0	0	0	0	0	0	0	0	0	0	0	0	0	0
hsa-miR-3663-5p	0	0	0	0	0	0	0	0	0	0	0	0	0	0	0	0	0	0	0	0	0	0	0	0	0	0	0	0	0	0	0	0	0	0	0	0	0	0	0	0
hsa-miR-4299	0	0	0	0	0	0	0	0	0	0	0	0	0	0	0	0	0	0	0	0	0	0	0	0	0	0	0	0	0	0	0	0	0	0	0	0	0	0	0	0
hsa-miR-548q	0	1.34682	4.46212	2.49724	0.729481	0.618487	2.49689	1.22083	0	0	0	0	1.49052	1.45455	0	0	4.50339	0	0	0	2.3156	0.666919	1.08271	2.27348	1.26451	4.71092	1.51698	0	0	0	0	0	1.45943	0	2.06775	1.65598	3.67417	0	0	1.6875
hsa-miR-3655	0	0	0	0	0	0	0	0	0	0	0	0	0	0	0	0	0	0	0	0	0	0	0	0	0	0	0	0	0	0	0	0	0	0	0	0	0	0	0	0
hsa-miR-1180-5p	0	0	2.23106	2.49724	0	1.85546	0	0	3.75774	0	0	0	0	0	1.39849	0	1.50113	0	0.7738	0	0	0.666919	0	1.13674	1.26451	0.672989	0	0	0	0	0	0	0	0	4.13549	0	2.44944	0	0	0
hsa-miR-539-5p	0	0	0	0	0	0	0	0	0	0	0	0	0	0	0	0	0	0	0	0	0	0	0	0	0	0	0	0	0	0	0	0	0	0	0	0	1.22472	0	0	0
hsa-miR-873-3p	0	2.69364	0	0	0.729481	2.47395	0.832296	2.44166	0	0	0	0	0	1.45455	1.39849	0	0.750564	1.57236	0.7738	1.05629	0.463121	0	1.08271	0.56837	0.632256	0	1.51698	0	0	0	0	0	0	3.35563	0	0	0	2.39466	0	1.6875
hsa-miR-6089	0	0	0	0	0	0	0	0	0	0	0	0	0	0	0	0	0	0	0	0	0	0	0	0	0	0	0	0	0	0	0	0	0	0	0	0	0	0	0	0
hsa-miR-3197	0	0	0	0	0	0	0	0	0	0	0	0	0	0	1.39849	0	0	0	0	0	0	0	0	0	0	0	0	0	0	0	2.23593	0	0	0	0	0	0	0	0	0
hsa-miR-1914-3p	0	0	0	0	0	0	0	0	0	0	0	0	0.745261	0	1.39849	0	0	0	0	0	0	0	1.08271	0	0	0	0	0	0	0	0	0	0	0	0	0	0	0	0	0
hsa-miR-6086	0	0	0	0	0	0	0	0	0	0	0	0	0	0	0	0	0	0	0	0	0	0	0	0	0	0	0	0	0	0	0	0	0	0	0	0	0	0	0	0
hsa-miR-4481	0	0	0	0	0	0	0	0	0	0	0	0	0	0	0	0	0	0	0	0	0	0	0	0	0	0	0	0	0	0	0	0	0	0	0	0	0	0	0	0
hsa-miR-144-5p	0	1.34682	2.23106	0	1.45896	0.618487	1.66459	0	2.81831	0	3.4998	0	2.23578	2.9091	4.19548	4.20426	1.50113	0	1.5476	1.05629	1.85248	0	2.16543	0	0.632256	0	3.64076	0	0	0	0	0	4.3783	3.35563	0	0	1.22472	0	0	1.6875
hsa-miR-4534	0	0	0	0	0	0	0	0	0	0	0	0	0	0	0	0	0	0	0	0	0	0	0	0	0	0	0	0	0	0	0	0	0	0	0	0	0	0	0	0
hsa-miR-8069	0	0	0	0	0	0	0	0	0	0	0	0	0	0	0	0	0	0	0	0	0	0	0	0	0	0	0	0	0	0	0	0	0	0	0	0	0	0	0	0
hsa-miR-145-3p	0	0	0	0	0	0	0	0	0	0	0	0	0	0	0	0	0	0	0	0	0	0	0	0	0	0	0	0	1.15159	0	0	0	0	0	0	0	0	0	0	0
hsa-miR-4722-5p	0	0	0	0	0	0	0	0	0	0	0	0	0	0	0	0	0	0	0	1.05629	0	0.666919	0	0	0	0	0	0	0	1.26397	0	0	0	0	0	0	1.22472	0	0	0
hsa-miR-657	0	0	0	0	0	0	0	0	0	0	0	0	0.745261	0	0	0	0	0	0	0	0	0	0	0	0	0	0	0	0	0	0	0	0	0	0	0	0	0	0	0
hsa-miR-4252	0	0	0	0	0	0	0	0	0	0	0	0	0	0	0	0	0	0	0	0	0	0	0	0	0	0	0	0	0	0	0	0	0	0	0	0	0	0	0	0
hsa-miR-3194-5p	0	0	0	0	0	0	0	0	0	0	0	0	0	0	0	0	0	0	0	0	0	0	0	0	0	0	0	0	0	0	0	0	0	0	0	0	0	0	0	0
hsa-miR-10396b-3p	0	0	0	0	0	0	0	0	0	0	1.7499	0	0	0	0	0	0	0	0	0	0	0.666919	0	0	0	0	0	0	0	0	0	0	0	0	0	0	0	0	0	0
hsa-miR-10396a-3p	0	0	0	0	0	0	0	0	0	0	0	0	0	0	0	0	0	0	0	0	0	0	0	0	0	0	0	0	0	0	0	0	0	0	0	0	0	0	0	0
hsa-miR-4312	0	0	0	0	0	0	0	0	0	0	0	0	0	0	0	0	0	0	0	0	0	0	0	0	0	0	0	0	0	0	0	0	0	0	0	0	0	0	0	0
hsa-miR-1273c	0	0	2.23106	0	0.364741	1.85546	3.32918	1.22083	0.939436	1.50493	1.7499	0	0.745261	2.9091	0	0	3.00226	0	0	1.05629	0.463121	0	0	0	0	1.34598	1.82038	0	0	2.52794	0	0	0	8.38907	0	0	0	2.39466	0	0
hsa-miR-4783-5p	0	0	0	0	0	0	0	0	0	0	0	0	0	0	0	0	0	0	0	0	0	0	0	0	0	0	0	0	0	0	0	0	0	0	0	0	0	0	0	0
hsa-miR-658	0	0	0	0	0	0	0	0	0	0	0	0	0	0	0	0	0	0	0	0	0	0	0	0	0	0	0	0	0	0	0	0	0	0	0	0	0	0	0	0
hsa-miR-8072	0	0	0	0	0	0	0	0	0	0	0	0	0	0	0	0	0	0	0	0	0	0.666919	0	0	0	0	0	0	0	0	0	0	0	0	0	0	0	0	0	0
hsa-miR-10396a-5p	0	0	0	0	0	0	0	0	0	0	0	0	0	0	0	0	0	0	0	0	0	0	0	0	0	0	0	0	0	0	0	0	0	0	0	0	0	0	0	0
hsa-miR-621	0	0	0	0	0	0	0	0	0	0	0	0	0	0	0	0	0	0	0	0	0	0	0	0	0	0	0	0	0	0	0	0	0	0	0	0	0	0	0	0
hsa-miR-7158-5p	0	0	0	0	0	0	0	0	0	0	0	0	0	0	0	0	0	0	0	0	0	0	0	0	0	0	0	0	0	0	0	0	0	0	0	0	0	0	0	0
hsa-miR-6847-3p	0	0	0	0	0	0	0	0	0	0	0	0	0	0	0	0	0	0	0	0	0	0	0	0	0	0	0	0	0	0	0	0	0	0	0	0	0	0	0	0
hsa-miR-4268	0	0	0	0	0	0	0	0	0	0	0	0	0	0	0	0	0	0	0	0	0	0	0	0	0	0	0	0	0	0	0	0	0	0	0	0	0	0	0	0
hsa-miR-4448	0	4.04046	0	7.49172	5.10637	8.65882	4.99377	1.22083	2.81831	6.01972	0	0	5.21683	4.36366	8.39096	0	6.75508	11.0065	7.738	1.05629	16.6723	5.33535	3.24814	14.2093	20.2322	34.3224	2.12378	0	13.819	0	0	6.56071	2.91887	0	4.13549	3.31196	1.22472	2.39466	0	1.6875
hsa-miR-8077	0	0	0	0	0	0	0	0	0	0	0	0	0	0	0	0	0	0	0	0	0	0	0	0	0	0	0	0	0	0	0	0	0	0	0	0	0	0	0	0
hsa-miR-5589-5p	0	0	0	0	0.364741	0	0	0	0	0	0	0	0	0	1.39849	0	0	0	0	0	0	0	0	0	0	0	0	0	0	0	0	0	0	0	0	0	0	0	0	0
hsa-miR-6131	0	0	0	0	0	0	0	0	0	0	1.7499	0	0	0	0	0	0	0	0	0	0	0	0	0	0	0	0	0	0	0	0	0	0	1.67781	0	0	0	0	0	0
hsa-miR-103a-1-5p	0	0	0	0	0	0	0	0	0	0	0	0	0	0	0	0	0	0	0	0	0	0	0	0	0	0	0	0	0	0	0	0	0	0	0	0	0	0	0	0
hsa-miR-4327	0	0	0	0	0	0	0	0	0	0	0	0	0	0	0	0	0	0	0	0	0	0	0	0	0	0	0	0	0	0	0	0	0	0	0	0	0	0	0	0
hsa-miR-3160-5p	0	0	0	0	0	0	0	0	0	1.50493	0	0	0	0	0	0	0	0	0	0	0	0	0	0	0	0	0	0	0	0	0	0	0	0	0	0	0	0	0	0
hsa-miR-6124	0	0	0	0	0	0	0	0	0	0	0	0	0	0	0	0	0	0	0	0	0	0	0	0	0	0	0	0	0	0	0	0	0	0	0	0	0	0	2.64044	0
hsa-miR-6077	0	0	0	0	0	0	0	0	0	0	0	0	0	0	0	0	0	0	0	0	0	0	0	0	0	0	0	0	0	0	0	0	0	0	0	0	0	0	0	0
hsa-miR-3619-3p	0	0	0	0	0	0	0	0	0	0	0	0	0	0	0	0	0	0	0.7738	0	0	0	0	0	0	0	0	0	0	0	0	0	0	0	0	0	0	0	0	0
hsa-miR-711	0	0	0	0	0	0	0	0	0	0	0	0	0	0	0	0	0	0	0	0	0	0	0	0	0	0	0	0	0	0	0	0	0	0	0	0	0	0	0	0
hsa-miR-6503-3p	0	0	0	0	0	0	0	0	0	0	0	0	0	0	0	0	0	0	0	0	0	0	0	0	0.632256	0	0.303397	0	0	0	0	0	0	0	0	0	0	0	0	0
hsa-miR-3689d	0	0	0	0	0	0	0	0	0	0	0	0	0	0	0	0	0	0	0	0	0	0	0	0	0	0	0	0	0	0	0	0	0	0	0	0	0	0	0	0
hsa-miR-4294	0	0	0	0	0	0	0	0	0	0	0	0	0	0	0	0	0	0	0	0	0	0	0	0	0	0	0	0	0	0	0	0	0	0	0	0	0	0	0	0
hsa-miR-504-3p	0	0	0	0	0	0	0	0	0	0	0	0	0	0	0	0	0	0	0	0	0.463121	0	0	0	0	0	0	0	0	0	0	0	0	0	0	0	0	0	0	0
hsa-miR-3201	0	0	0	0	0	0	0	0	0	0	0	0	0	0	0	0	0	0	0	0	0	0	0	0	0	0	0	0	0	0	0	0	0	0	0	0	0	0	0	0
hsa-miR-1193	0	0	0	0	0	0	0	0	0	0	0	0	0	0	0	0	0	0	0	0	0	0	0	0	0	0	0	0	0	0	0	0	0	0	0	0	0	0	0	0
hsa-miR-4320	0	0	0	0	0	0	0	0	0	0	0	0	0	0	0	0	0	0	0	0	0	0	0	0	0	0	0	0	0	0	0	0	0	0	0	0	0	0	0	0
hsa-miR-6744-3p	0	0	0	0	0	0	0	0	0	0	0	0	0	0	0	0	0	0	0	0	0	0	0	0	0	0	0	0	0	0	0	0	0	0	0	0	0	0	0	0
hsa-miR-6069	0	0	0	0	0	0	0	0	0	0	0	0	0	0	0	0	0	0	0	0	0	0	0	0	0	0	0	0	0	0	0	0	0	0	0	0	0	0	0	0
hsa-miR-4284	0	0	0	0	0	0	0	0	0	0	0	0	0	0	0	0	0	0	0	0	0	0	0	0	0	0	0	0	0	0	0	0	0	0	0	0	0	0	0	0
hsa-miR-5787	0	0	0	0	0	0	0	0	0	0	0	0	0	0	0	0	0	0	0	0	0	0	0	0	0	0	0	0	0	0	0	0	0	0	0	0	0	0	0	0
hsa-miR-3153	0	0	0	0	0	0	0	0	0	0	0	0	0	0	0	0	0	0	0	0	0	0	0	0	0	0	0	0	0	0	0	0	0	0	0	0	0	0	0	0
hsa-miR-8059	0	0	0	0	0	0	0	0	0	0	0	0	0	0	0	0	0	0	0	0	0	0	0	0	0	0	0	0	0	0	0	0	0	0	0	0	0	0	0	0
hsa-miR-6090	0	0	0	0	0	0	0	0	0	0	0	0	0	0	0	0	0	0	0	0	0	0	0	0	0	0	0	0	0	0	0	0	0	0	0	0	0	0	0	0
hsa-miR-920	0	0	0	0	0	0	0	0	0	0	0	0	0	0	0	0	0	0	0	0	0	0	0	0	0	0	0	0	0	0	0	0	0	0	0	0	0	0	0	0
hsa-miR-6799-5p	0	0	0	0	0	0	0.832296	0	0	0	0	0	0	0	0	0	0	0	0	0	0	0	0	0	0.632256	0	0	0	0	1.26397	0	0	0	0	0	0	0	0	2.64044	0
hsa-miR-2861	0	0	0	0	0	0	0	0	0	0	0	0	0	0	0	0	0	0	0	0	0	0	0	0	0	0	0	0	0	0	0	0	0	0	0	0	0	0	0	0
hsa-miR-3178	0	0	0	2.49724	0	0	0	0	0	0	0	0	0	0	1.39849	0	0	0	0	0	0	0	0	0	0	0	0	0	0	0	0	0	0	0	0	0	0	0	0	0
hsa-miR-762	0	0	0	0	0	0	0	0	0	0	0	0	0	0	0	0	0	0	0.7738	0	0	0.666919	0	0	0	0	0	0	0	0	0	0	0	0	0	0	1.22472	0	0	0
hsa-miR-4675	0	0	0	0	0	0	0	0	0	0	0	0	0	0	0	0	0	0	0	0	0	0	0	0	0	0	0	0	0	0	0	0	0	0	0	0	0	0	0	0
hsa-miR-4271	0	0	0	0	0	0	0	0	0	0	0	0	0	0	0	0	0	0	0	0	0	0	0	0	0	0	0	0	0	0	0	0	0	0	0	0	0	0	0	0
hsa-miR-128-2-5p	0	0	0	0	0	0	0	0	0	0	0	0	0	0	0	0	0	0	0	0	0	0	0	0	0	0	0	0	0	0	0	0	0	0	0	0	0	0	0	0
hsa-miR-328-5p	0	0	0	0	0	0	0	0	0	0	0	0	0	0	0	0	0	0	0	0	0	0	0	0	0	0	0	0	0	0	0	0	0	0	0	0	0	0	0	0
hsa-miR-6752-5p	0	0	0	0	0	0	0	0	0	0	0	0	0	0	0	0	0	0	0	0	0	0	0	0	0	0	0	0	0	0	0	0	0	0	0	0	0	0	0	0
hsa-miR-615-5p	0	0	0	0	0	0	0	0	0	0	0	0	0	0	0	0	0	0	0	0	0.463121	0	0	0	0	0	0	0	0	0	0	0	0	0	0	0	0	0	0	0
hsa-miR-4483	0	0	0	0	0	0	0	0	0	0	0	0	0	0	0	0	0	0	0	0	0	0	0	0	0	0	0	0	0	0	0	0	0	0	0	0	0	0	0	0
hsa-miR-23a-5p	0	0	0	2.49724	1.8237	0.618487	0	3.66249	1.87887	1.50493	0	0	1.49052	0	1.39849	0	0.750564	1.57236	2.3214	1.05629	0.926242	0	2.16543	3.41022	3.16128	0	1.21359	2.19318	0	3.79191	4.47186	3.28035	0	1.67781	0	0	4.89889	0	0	0
hsa-miR-4281	0	0	0	0	0	0	0	0	0	0	0	0	0	0	0	0	0	0	0	0	0	0	0	0	0	0	0	0	0	0	0	0	0	0	0	0	0	0	0	0
hsa-miR-4710	0	0	2.23106	0	0	0	2.49689	0	0.939436	0	1.7499	0	0.745261	0	0	0	0.750564	0	2.3214	2.11257	0	0	0	0	1.89677	0	0	0	1.15159	0	0	0	1.45943	0	6.20324	3.31196	1.22472	2.39466	0	0
hsa-miR-4466	0	0	0	2.49724	0.364741	0	0	0	2.81831	1.50493	0	9.05067	0.745261	0	1.39849	0	0	1.57236	0	0	0	0	1.08271	0.56837	1.26451	0	0	1.09659	0	0	0	0	0	0	2.06775	0	0	0	0	0
hsa-miR-5087	0	0	0	0	0	0	0	0	0	0	0	0	0	0	0	0	0	0	0	0	0	0	0	0	0	0	0	0	0	0	0	0	0	0	0	0	0	0	0	0
hsa-miR-376a-2-5p	0	0	0	0	0	0	0	0	0.939436	0	0	0	0	0	0	0	0	0	0	0	0	0	0	0	0	0	0	0	0	0	0	0	0	0	0	0	0	0	0	0
hsa-miR-6073	0	0	0	0	0	0	0	0	0	0	0	0	0	0	0	0	0	0	0	0	0	0	0	0	0	0	0	0	0	0	0	0	0	0	0	0	0	0	0	0
hsa-miR-3713	0	0	0	0	0	0	0	0	0	0	0	0	0	0	0	0	0	0	0	0	0	0	0	0	0	0	0	0	0	0	0	0	0	0	0	0	0	0	0	0
hsa-miR-198	0	0	0	0	0	0	0	0	0	0	0	0	0	0	0	0	0	0	0	0	0	0	0	0	0	0	0	0	0	0	0	0	0	0	0	0	0	0	0	0
hsa-miR-489-5p	0	0	0	0	0	0	0	0	0	0	0	0	0	0	0	0	0	0	0	0	0	0	0	0	0	0	0	0	0	0	0	0	0	0	0	0	0	0	0	0
hsa-miR-8078	0	0	0	0	0	0	0	0	0	0	0	0	0	0	0	0	0	0	0	0	0	0	0	0	0	0	0	0	0	0	0	0	0	0	0	0	0	0	0	0
hsa-miR-4316	0	0	0	0	0	0	0	0	0	0	0	0	0	0	0	0	0	0	0	0	0	0	0	0	0	0	0	0	0	0	0	0	0	0	0	0	0	0	0	0
hsa-miR-143-5p	0	0	0	0	0	0	0	0	0	0	0	0	0	0	0	0	0	0	0	0	0	0	0	0	0	0	0.303397	0	0	0	0	0	0	0	0	0	0	0	0	0
hsa-miR-376c-5p	0	0	0	0	0	0	0	0	0	0	0	0	0	0	0	0	0	0	0	0	0	0.666919	0	0	0	0	0	0	0	0	0	0	0	0	0	0	0	0	0	0
hsa-miR-663b	0	0	0	0	0	0	0	0	0	0	0	0	0	0	0	0	0	0	0	0	0	0	0	0	0	0	0	0	0	0	0	0	0	0	0	0	0	0	0	0
hsa-miR-4769-5p	0	0	0	0	0	0	0	0	0	0	0	0	0	0	0	0	0	0	0	0	0	0	0	0	0	0	0	0	0	0	0	0	0	0	0	0	0	0	0	0
hsa-miR-3151-5p	0	0	0	0	0	0	0	0	0	0	0	0	0	0	0	0	0	0	0	0	0	0	0	0	0	0	0	0	0	0	0	0	0	0	0	0	0	0	0	0
hsa-miR-4447	0	0	0	0	0	0	0	0	0	0	0	0	0	0	0	0	0	0	0	0	0	0	0	0	0	0	0	0	0	0	0	0	0	0	0	0	0	0	0	0
hsa-miR-4472	0	0	0	0	0	0	0	0	0	0	0	0	0	0	0	0	0	0	0	0	0	0	0	0	0	0	0	0	0	0	0	0	0	0	0	0	0	0	0	0
hsa-miR-642b-5p	0	0	0	0	0	0	0.832296	0	0	0	0	0	0	0	1.39849	0	0	0	0	0	0	0	1.08271	0	0	0	0	0	0	0	0	0	0	0	0	1.65598	0	0	0	0
hsa-miR-3147	0	0	0	0	0	0	0	0	0	0	0	0	0	0	0	0	0	0	0	0	0	0	0	0	0	0	0	0	0	0	0	0	0	0	0	0	0	0	0	0
hsa-miR-6792-5p	0	0	0	0	0.364741	0	0	0	0	0	0	0	0	0	0	0	0	0	0	1.05629	0	0	0	0	0.632256	0	0	1.09659	1.15159	0	0	0	0	0	4.13549	0	1.22472	0	0	0
hsa-miR-6892-5p	0	0	0	0	0	0	0.832296	1.22083	0	0	0	0	0	0	0	4.20426	0.750564	0	0.7738	0	0.463121	0	2.16543	0.56837	0.632256	2.69195	0.303397	1.09659	0	0	0	0	0	0	0	1.65598	0	0	0	3.37499
hsa-miR-4724-3p	0	0	0	0	0	0	0	0	0	0	0	0	0	0	0	0	0	0	0	0	0	0	0	0	0	0	0	0	0	0	0	0	0	0	0	0	0	0	0	0
hsa-miR-376a-5p	0	1.34682	0	0	0	0	0	0	0	0	0	0	0	0	0	0	0	0	0	0	0.926242	0.666919	0	0	0.632256	0	0	0	0	0	0	0	0	0	0	0	0	0	0	0
hsa-miR-5682	0	0	0	0	0	0	0.832296	0	0	0	0	0	0	0	0	0	0	0	0	0	0.926242	0	0	0	0.632256	0.672989	0	0	0	0	0	0	0	0	0	1.65598	0	0	0	0
hsa-miR-6824-5p	0	0	0	0	0	0	0	0	0	0	0	0	0	0	0	0	0	0	0	0	0	0	0	0.56837	0	0	0	0	0	0	0	0	0	0	0	0	0	0	0	0
hsa-miR-6789-5p	0	1.34682	0	0	0.364741	0	0	1.22083	0	0	0	0	0	0	0	4.20426	0	0	0	0	0	0	0	0.56837	0	0	0.303397	0	0	0	0	0	0	0	0	1.65598	1.22472	0	0	0
hsa-miR-6800-5p	0	0	0	0	0	0	0	0	0	0	0	0	0	0	0	0	0	0	0	0	0	0	0	0	0	0	0	0	0	0	0	0	0	0	0	0	0	0	0	0
hsa-miR-4789-5p	0	0	0	0	0	0	0	0	0	0	0	0	0	0	0	0	0	0	0	0	0	0	0	0	0	0	0	0	0	0	0	0	0	0	0	0	0	0	0	0
hsa-miR-4420	0	0	0	0	0	0	0	0	0	0	0	0	0	0	0	0	0	0	0	0	0	0	0	0	0	0	0	0	0	0	0	0	0	0	0	0	0	0	0	0
hsa-miR-4436b-5p	0	0	0	0	0	0	0	0	0	0	0	0	0	0	0	0	0	0	0	0	0	0	0	0	0	0	0	0	0	0	0	0	0	0	0	0	0	0	0	0
hsa-miR-670-5p	0	0	0	0	0	0	0	0	0	0	0	0	0	0	0	0	0	0	0	0	0	0	0	0	0	0	0	0	0	0	0	0	0	0	0	0	0	0	0	0
hsa-miR-572	0	0	0	0	0	0	0	0	0	0	0	0	0	0	0	0	0	0	0	0	0	0	0	0	0	0	0	0	0	0	0	0	0	0	0	0	0	0	0	0
hsa-miR-5571-3p	0	0	0	0	0	0	0	0	0	0	0	0	0	0	0	0	0	0	0	0	0	0	0	0	0	0	0	0	0	0	0	0	0	0	0	0	0	0	0	0
hsa-miR-4691-5p	0	0	2.23106	0	0	0	0	0	0	0	0	0	0	0	0	0	0	0	0	0	0	0	0	0	0	0	0	0	0	0	0	0	0	0	0	0	0	0	0	0
hsa-miR-11181-5p	0	0	0	0	0	0	0	0	0	0	0	0	0	0	0	0	0	0	0	0	0	0	0	0	0	0	0	0	0	0	0	0	0	0	0	0	0	0	0	0
hsa-miR-6126	0	0	0	0	0	0	0	0	0	0	0	0	0	0	0	0	0	0	0	0	0	0	0	0	0	0	0	0	0	0	0	0	0	0	0	0	0	0	0	0
hsa-miR-4439	0	0	0	0	0	0	0	0	0	0	0	0	0	0	0	0	0	0	0	0	0	0	0	0	0	0	0	0	0	0	0	0	0	0	0	0	0	0	0	0
hsa-miR-6864-3p	0	0	0	0	0	0	0	0	0	0	0	0	0	0	0	0	0	0	0	0	0	0	0	0	0	0	0	0	0	0	0	0	0	0	0	0	0	0	0	0
hsa-miR-6807-5p	0	0	0	0	0	0	0	0	0	0	0	0	0	1.45455	0	0	0.750564	0	0	0	0	0	0	0	0	0	0	0	0	0	0	0	0	0	0	0	0	0	0	0
hsa-miR-6858-5p	0	0	0	0	0	0	0	0	0	0	1.7499	0	0	0	0	0	0	0	0	0	0	0	0	0.56837	0	0	0	0	0	0	0	0	0	0	0	0	0	0	0	0
hsa-miR-6765-5p	0	0	0	0	0	0	0	0	0	0	0	0	0	0	0	0	0	0	0	0	0	0	0	0	0	0	0	0	0	0	0	0	0	0	0	0	0	0	0	0
hsa-miR-6834-5p	0	1.34682	0	2.49724	0.364741	0	0	0	0	0	0	0	0	0	0	0	0	0	0	0	0	0	0	0	0	0	0	0	0	0	0	0	0	0	2.06775	0	0	0	0	0
hsa-miR-1226-5p	0	0	0	0	0.364741	0	0	0	0	0	0	0	0	0	0	0	0	0	0	0	0	0	0	0	0	0	0	0	0	0	0	0	0	0	0	0	0	0	0	0
hsa-miR-6869-5p	0	0	0	0	0	0	0	0	0	0	0	0	0	0	0	0	0	0	0	0	0	0	0	0	0	0	0	0	0	1.26397	0	0	0	0	0	0	0	0	0	0
hsa-miR-937-5p	0	0	0	0	0	0	0	0	0	0	0	0	0	0	0	0	0	0	0	0	0	0	0	0	0	0	0	0	0	1.26397	0	0	0	0	0	0	0	0	0	0
hsa-miR-1238-5p	0	0	0	0	0	0	0	0	0	0	0	0	0	0	0	0	0	0	0	0	0	0	0	0	0	0	0	0	0	0	0	0	0	0	0	0	0	0	0	0
hsa-miR-4758-5p	0	0	0	0	0	0	0	0	0.939436	0	0	0	0	0	0	4.20426	0	0	0	0	0	0	0	0	0	0	0	0	0	0	0	0	0	0	0	0	1.22472	0	0	0
hsa-miR-4658	0	0	0	0	0	0	0	0	0	0	0	0	0	0	0	0	0	0	0	0	0	0	0	0	0	0	0	0	0	0	0	0	0	0	0	0	0	0	0	0
hsa-miR-6790-5p	0	0	0	0	0.364741	0	0	0	0	0	0	0	0	0	0	0	0	0	0	0	0	0	0	0	0	0	0	0	0	0	0	0	0	0	0	0	0	0	0	0
hsa-miR-10395-5p	0	0	0	0	0	0	0	0	0	0	0	0	0	0	0	0	0	0	0	0	0	0	0	0	0	0	0	0	0	0	0	0	0	0	0	0	0	0	0	0
hsa-miR-548aw	0	0	0	0	0.729481	0.618487	0.832296	0	1.87887	1.50493	1.7499	0	0	0	0	0	3.75282	0	3.0952	0	2.3156	2.00076	1.08271	0.56837	1.26451	2.69195	0.303397	2.19318	0	0	2.23593	0	0	0	0	0	0	0	0	1.6875
hsa-miR-5011-3p	0	0	0	0	0	0	0	0	0	0	0	0	0	0	0	0	0	0	0	0	0	0	0	0	0	0	0	0	0	0	0	0	0	0	0	0	0	0	0	0
hsa-miR-4715-3p	0	0	0	0	0	0	0	0	0	0	0	0	0	0	0	0	0	0	0	0	0	0	0	0	0	0	0	0	0	0	0	0	0	0	0	0	0	0	0	0
hsa-miR-1202	0	0	0	0	0	0	0	0	0	0	0	0	0	0	0	0	0	0	0	0	0	0	0	0	0	0	0	0	0	0	0	0	0	0	0	0	0	0	0	0
hsa-miR-6850-5p	0	0	0	0	0.364741	0	0.832296	0	0	0	0	0	0	0	0	0	0	0	0	0	0	0	0	0	0	0	0.303397	0	0	0	0	0	0	0	0	0	0	0	0	0
hsa-miR-3977	0	0	0	0	0	0	0	0	0	0	0	0	0	0	0	0	0	0	0	0	0	0	0	0	0	0	0	0	0	0	0	0	0	0	0	0	0	0	0	0
hsa-miR-3978	0	0	0	0	0	0	0	0	0	0	0	0	0	0	0	0	0	0	0	0	0	0	0	0	0	0	0	0	0	0	0	0	0	0	0	0	0	0	0	0
hsa-miR-4776-5p	0	0	0	0	0	0	0	0	0	0	0	0	0	0	0	0	0	0	0	0	0	0	0	0	0	0	0	0	0	0	0	0	0	0	0	0	0	0	0	0
hsa-miR-4535	0	0	0	0	0	0	0	0	0	0	0	0	0	0	0	0	0	0	0	0	0	0	0	0	0	0	0	0	0	0	0	0	0	0	0	0	0	0	0	1.6875
hsa-miR-3198	0	0	0	0	0	0.618487	0	1.22083	2.81831	0	0	0	0	0	1.39849	0	0.750564	0	0	0	0	0	0	0	0	0	0	0	1.15159	1.26397	0	0	0	0	0	0	0	0	0	0
hsa-miR-8057	0	0	0	0	0	0	0	0	0	0	0	0	0	0	0	0	0	0	0	0	0	0	0	0	0	0	0	0	0	0	0	0	0	0	0	0	0	0	0	0
hsa-miR-647	0	0	0	0	0	0	0	0	0	0	0	0	0	0	0	0	0	0	0	0	0	0	0	0	0	0	0	0	0	0	0	0	0	0	0	0	0	0	0	0
hsa-miR-5089-5p	0	0	0	0	0	0	0	0	0	0	0	0	0	0	0	0	0	0	0	0	0	0	0	0	0	0	0	0	0	0	0	0	0	0	0	0	0	0	0	0
hsa-miR-1228-5p	0	0	0	0	0	0.618487	0	0	0	0	0	0	0	0	0	0	0	0	0	0	0	0	0	0	0	0	0	0	0	0	0	0	0	0	0	0	0	0	0	0
hsa-miR-1227-5p	0	0	0	0	0	0	0	0	0	0	0	0	0	0	0	0	0	0	0	0	0	0	0	0	0	0	0	0	0	0	0	0	0	0	0	0	0	0	2.64044	0
hsa-miR-1225-5p	0	0	0	0	0	0	0	0	0	0	0	0	0	0	0	0	0	0	0	0	0	0	0	0	0	0	0	0	0	0	0	0	0	0	0	0	0	0	0	0
hsa-miR-1229-5p	0	0	0	0	0	0	0	0	0	0	0	0	0	0	0	0	0	0	0	0	0.463121	0	0	0	0	0	0	0	0	0	0	0	0	0	0	0	0	0	0	1.6875
hsa-miR-6741-5p	0	0	0	0	0.364741	0	1.66459	0	0	0	1.7499	0	0	1.45455	0	0	0.750564	0	2.3214	1.05629	0.463121	0	0	0	0	0	0.303397	0	0	0	0	0	0	0	0	0	0	0	0	0
hsa-miR-3940-5p	0	0	0	0	0	1.23697	0	0	0.939436	0	0	0	0.745261	0	0	0	0	0	0	1.05629	0.463121	0	0	0	0	0	0.303397	0	1.15159	0	0	0	1.45943	1.67781	0	0	1.22472	0	0	0
hsa-miR-6848-3p	0	0	0	0	0	0	0	0	0	0	0	0	0	0	0	0	0	0	0	0	0	0	0	0	0	0	0	0	0	0	0	0	0	0	0	0	0	0	0	0
hsa-miR-487a-5p	0	0	0	0	0.364741	0	0	0	0	0	0	0	0	0	0	0	0	0	0	0	0	0	0	0	0	0	0	0	0	0	0	0	0	0	0	0	0	0	0	0
hsa-miR-487b-5p	0	0	0	0	0	0	0	0	0.939436	0	0	0	0	0	0	0	0	0	0	0	0.926242	0	0	0	0	0	0	0	0	0	0	0	0	0	0	0	0	0	0	0
hsa-miR-632	0	0	0	0	0	0	0	0	0	0	0	0	0	0	0	0	0	0	0	0	0	0	0	0	0	0	0	0	0	0	0	0	0	0	0	0	0	0	0	0
hsa-miR-1231	0	0	0	0	0	0	0	0	0	0	0	0	0	0	0	0	0	0	0	0	0	0	0	0	0	0	0	1.09659	0	0	0	0	0	0	0	0	0	0	0	0
hsa-miR-511-5p	0	0	0	0	0	0	0	0	0	0	0	0	0	0	0	0	0	0	0	0	0	0	0	0	0	0	0	0	0	0	0	0	0	0	0	0	0	0	0	0
hsa-miR-6808-3p	0	0	0	0	0	0	0	0	0	0	0	0	0	0	0	0	0	0	0	0	0.463121	0.666919	0	0	0	0.672989	0.303397	0	0	0	0	0	0	0	0	0	0	0	0	0
hsa-miR-6833-5p	0	0	0	0	0.364741	0	0	0	0	0	1.7499	0	0.745261	0	0	0	0	0	0.7738	0	0	0	0	0	0	0	0.303397	0	0	0	0	0	0	0	0	0	0	0	0	0
hsa-miR-7108-5p	0	0	0	0	0	0	0	0	0	0	0	0	0	0	0	0	0	0	0	0	0	0	0	0	0	0	0	0	0	0	0	0	0	0	0	0	0	0	0	0
hsa-miR-147a	0	0	0	0	0	0	0	0	0	0	0	0	0	0	0	0	0	0	0	0	0	0	0	0	0	0	0	0	0	0	0	0	0	0	0	0	0	0	0	0
hsa-miR-2053	0	0	0	0	0	0	0	0	0	0	0	0	0	0	0	0	0	0	0	0	0	0	0	0	0	0	0	0	0	0	0	0	0	0	0	0	0	0	0	0
hsa-miR-4273	0	0	0	0	0	0	0	0	0	0	0	0	0	0	0	0	0	0	0	0	0	0	0	0	0	0	0	0	0	0	0	0	0	0	0	0	0	0	0	0
hsa-miR-653-5p	0	0	0	0	0.729481	1.85546	0	0	0	0	1.7499	0	1.49052	0	0	0	1.50113	1.57236	0	1.05629	0	0.666919	0	0.56837	0	0	0.606794	0	0	1.26397	0	3.28035	0	0	0	1.65598	1.22472	0	0	1.6875
hsa-miR-2909	0	0	0	0	0	0	0	0	0	0	0	0	0	0	0	0	0	0	0	0	0	0	0	0	0	0	0	0	0	0	0	0	0	0	0	0	0	0	0	0
hsa-miR-607	0	0	0	0	0	0	0	0	0	0	0	0	0	0	0	0	0	0	0	0	0	0	0	0	0	0	0	0	0	0	0	0	0	0	0	0	0	2.39466	0	0
hsa-miR-3692-3p	0	0	0	0	0	0	0	0	0	0	0	0	0	0	0	0	0	0	0	0	0	0	0	0	0	0	0	0	0	0	0	0	0	0	0	0	0	0	0	0
hsa-miR-3074-5p	0	4.04046	4.46212	4.99448	1.8237	1.85546	2.49689	3.66249	3.75774	3.00986	1.7499	18.1013	1.49052	1.45455	4.19548	0	2.25169	0	6.9642	5.28143	2.3156	2.00076	3.24814	5.11533	3.16128	1.34598	4.55095	1.09659	1.15159	1.26397	8.94373	3.28035	2.91887	3.35563	2.06775	6.62392	2.44944	0	0	0
hsa-miR-4652-3p	0	0	0	0	0	0	0	0	0	0	0	0	0	0	0	0	0	0	0	0	0	0	0	0	0	0	0	0	0	0	0	0	0	0	0	0	0	0	0	0
hsa-miR-3122	0	0	0	0	0	0	0	0	0	0	0	0	0	0	0	0	0	0	0	0	0	0	0	0	0	0	0	0	0	0	0	0	0	0	0	0	0	0	0	0
hsa-miR-5572	0	0	0	0	0	0	0	0	0	0	0	0	0	0	0	0	0	0	0	0	0	0	0	0	0	0	0	0	0	0	0	0	0	0	0	0	0	0	0	0
hsa-miR-599	0	0	0	0	0	0	1.66459	1.22083	0	0	0	0	0	0	0	0	0	0	0	0	0	0	0	0	0	0	0	0	0	0	0	0	0	0	0	0	0	0	0	0
hsa-miR-552-5p	0	0	0	2.49724	0.364741	0.618487	0	0	0.939436	0	0	0	0	0	0	0	0	0	0.7738	0	0	0	1.08271	0	3.16128	0	0	1.09659	1.15159	0	0	0	0	3.35563	0	0	0	0	0	0
hsa-miR-557	0	0	0	0	0	0	0	0	0	0	0	0	0	0	0	0	0	0	0	0	0	0	0	0	0	0	0	0	0	0	0	0	0	0	0	0	0	0	0	0
hsa-miR-7850-5p	0	0	0	0	0.729481	0	0	0	0.939436	0	0	0	0	0	0	0	0	0	0	0	0	0	0	0	0	0	0	0	0	0	0	0	0	0	0	0	0	0	0	0
hsa-miR-2681-5p	0	0	0	0	0.364741	0	0	0	0	0	0	0	0	0	0	0	0	0	0	0	0	0	0	0	0	0	0	0	0	0	0	0	0	0	0	0	0	0	0	0
hsa-miR-548x-3p	0	0	0	0	0	0	0	0	0	0	0	0	0	0	0	0	0	0	0	0	0	0	0	0	0	0	0	0	0	0	0	0	0	0	0	0	0	0	0	0
hsa-miR-548aj-3p	0	0	0	0	0	0	0	0	0	0	0	0	0	0	0	0	0.750564	0	0	0	0	0	0	0	0	0	0.303397	0	0	0	0	0	0	0	0	0	0	0	0	0
hsa-miR-548as-3p	0	0	0	0	0	0	0	0	0	0	0	0	1.49052	0	0	0	0	0	0.7738	1.05629	0	0	1.08271	0	0	0	0.303397	0	0	0	0	0	1.45943	0	0	0	0	2.39466	0	0
hsa-miR-548ar-3p	0	0	0	0	0.364741	0	0	0	0	0	0	0	0	0	0	0	0	0	0	0	0	0	0	0	0	0	0	0	0	0	0	0	0	0	0	0	0	0	0	0
hsa-miR-5582-3p	0	0	0	0	0	0	0	0	0	0	0	0	0	0	0	0	0	0	0	0	0	0	0	0	0	0	0	0	0	0	0	0	0	0	0	0	0	0	0	0
hsa-miR-4282	0	0	0	0	0	0	0	0	0	0	0	0	0	0	0	0	0	0	0	0	0	0	0	0	0	0	0	0	0	0	0	0	0	0	0	0	0	0	0	0
hsa-miR-3133	0	0	0	0	1.8237	0	0	0	0	1.50493	1.7499	0	0	1.45455	0	0	0.750564	0	0.7738	3.16886	1.38936	1.33384	0	0.56837	1.26451	1.34598	0.910191	1.09659	0	1.26397	0	0	1.45943	0	0	0	0	0	0	1.6875
hsa-miR-7161-5p	0	0	0	0	0	0	0	0	0	0	0	0	0	0	0	0	0	0	0	0	0	0	0	0	0	0	0	0	0	0	0	0	0	0	0	0	0	0	0	0
hsa-miR-1276	0	0	0	0	0.364741	0	0.832296	1.22083	0	0	0	0	0	1.45455	0	4.20426	0	0	0	0	0.463121	0	0	0.56837	0.632256	0.672989	0.606794	0	0	0	0	0	0	0	0	0	1.22472	0	0	0
hsa-miR-12135	0	0	0	0	0	0	0	1.22083	0	0	0	0	0.745261	0	0	0	0	0	0	0	0	0	0	0	0	0	0.303397	1.09659	0	0	0	0	0	0	0	0	0	0	0	0
hsa-miR-559	0	0	0	0	0	0	0	0	0	0	0	0	0	0	0	0	0	0	0	0	0	0	0	0	0	0	0	0	0	0	0	0	0	1.67781	0	0	0	0	0	0
hsa-miR-4796-3p	0	0	0	0	1.45896	0.618487	0.832296	0	0.939436	0	0	0	0	1.45455	0	0	0	1.57236	0	0	0.926242	0.666919	0	0.56837	0.632256	0	0.910191	1.09659	0	0	0	3.28035	1.45943	0	0	1.65598	1.22472	0	0	0
hsa-miR-3121-3p	0	0	0	0	0	0	0	0	0	0	0	0	0	0	0	0	0	0	0	0	0	0	0	0	0	0	0	0	0	0	0	0	0	1.67781	0	0	0	0	0	0
hsa-miR-605-5p	0	0	0	0	0.364741	0	0	0	0	0	0	0	0	0	0	0	0.750564	0	0	0	0	0	0	0	0	0	0	0	0	0	0	0	0	0	0	0	0	0	0	0
hsa-miR-513c-3p	0	0	0	0	0.364741	0	0	0	0	0	0	0	0	0	0	0	0	0	0	0	0	0	0	0	0	0	0	0	0	0	0	0	0	0	0	0	0	0	0	0
hsa-miR-513a-3p	0	0	0	0	0.364741	0	0	0	0	0	0	0	0	0	0	0	0	0	0.7738	0	0.463121	0	0	0	0	0	0	0	0	1.26397	2.23593	0	0	0	0	0	1.22472	0	0	1.6875
hsa-miR-5688	0	0	0	0	0	0	0	0	0	0	0	0	0	0	0	0	0	0	0	0	0	0	0	0	0	0	0	0	0	0	0	0	0	0	0	0	0	0	0	0
hsa-miR-212-3p	0	0	0	0	0	0	0	0	0	1.50493	0	0	0	0	1.39849	0	0	1.57236	0.7738	0	0	0	0	0	0	0	0.606794	1.09659	0	1.26397	0	0	0	0	0	0	0	0	0	0
hsa-miR-4803	0	0	0	0	0	0	0	0	0	0	0	0	0	0	0	0	0	0	0	0	0	0	0	0	0	0	0	0	0	0	0	0	0	0	0	0	0	0	0	0
hsa-miR-4485-3p	0	0	0	0	0.364741	0	0	0	0	0	0	0	0	0	0	0	0.750564	0	0.7738	0	0	0	1.08271	0	0.632256	1.34598	0.303397	0	1.15159	0	0	0	0	0	0	1.65598	0	0	0	0
hsa-miR-12120	0	0	0	0	0	0	0	0	0	0	0	0	0	0	0	0	0	0	0	0	0	0	0	0	0	0	0	0	0	0	0	0	0	0	0	0	0	0	0	0
hsa-miR-6891-5p	0	0	0	0	0	0	0	0	0	0	0	0	0	0	0	0	0	0	0	1.05629	0	0	0	0	0	0	0	0	0	0	0	0	0	0	4.13549	0	0	2.39466	0	1.6875
hsa-miR-124-3p	0	1.34682	0	2.49724	0.364741	0.618487	0	0	0.939436	0	0	0	0	0	0	0	2.25169	0	0.7738	0	0	1.33384	0	0	0	1.34598	0.606794	0	0	1.26397	0	0	0	0	2.06775	0	0	0	0	0
hsa-miR-302e	0	0	0	0	0	0	0	0	0	0	0	0	0	0	0	0	0	0	0	0	0	0	0	0	0	0	0	0	0	0	0	0	0	0	0	0	0	0	0	0
hsa-miR-302c-3p	0	0	0	0	0	0	0	0	0	0	0	0	0	0	0	0	0	0	0	0	0	0	0	0	0	0	0	0	0	0	0	0	0	0	0	0	0	0	0	0
hsa-miR-302d-3p	0	0	0	0	0	0	0	0	0	0	0	0	0	0	0	0	0	0	0	0	0	0	0	0	0	0	0	0	0	0	0	0	0	0	0	0	0	0	0	0
hsa-miR-302b-3p	0	0	0	0	0	0	0	0	0	0	0	0	0	0	0	0	0	1.57236	0	0	0	0	0	0	0	0	0	0	0	0	0	0	1.45943	0	0	0	0	0	0	0
hsa-miR-302a-3p	0	0	0	0	0	0	0	0	0	0	0	0	0	0	0	0	0	0	0	0	0	0	0	0	0	0	0	0	0	0	0	0	0	0	0	0	0	0	0	0
hsa-miR-580-5p	0	0	0	0	0	0	0	0	0	0	1.7499	0	0	0	0	0	0	0	0	0	0	0	0	0	0	0	0	0	0	0	0	0	0	0	0	0	0	0	0	0
hsa-miR-5700	0	0	0	0	0	0	0	0	0	0	0	0	0	0	0	0	0	0	0	1.05629	0	0	0	0	0	0	0	0	0	0	0	0	0	0	0	0	0	0	0	0
hsa-miR-302f	0	0	0	0	0	0	0	0	0	0	0	0	0	0	0	0	0	0	0	0	0	0	0	0	0	0	0	0	0	0	0	0	0	0	0	0	0	0	0	0
hsa-miR-4801	0	0	0	0	0	0	0	0	0	0	0	0	0	0	0	0	0	0	0	0	0	0	0	0	0	0	0	0	0	0	0	0	0	0	0	0	0	0	0	0
hsa-miR-5683	0	0	0	0	0.364741	0.618487	0	0	0	0	0	0	0	0	0	0	0	0	0	0	0	0.666919	1.08271	0	0	0	0.303397	0	0	0	2.23593	0	2.91887	0	0	0	0	0	0	0
hsa-miR-6856-3p	0	0	0	0	0	0	0	0	0	0	0	0	0	0	0	0	0	0	0	0	0	0	0	0	0	0	0	0	0	0	0	0	0	0	0	0	0	0	0	0
hsa-miR-144-3p	0	1.34682	2.23106	0	1.09422	1.85546	2.49689	0	10.3338	0	0	0	5.21683	0	0	0	0	0	3.0952	1.05629	0.463121	0.666919	2.16543	0.56837	0	0	3.33737	0	1.15159	0	4.47186	0	1.45943	0	0	0	0	0	0	8.43749
hsa-miR-4802-3p	0	0	0	0	0	0	0	0	0	0	0	0	0	0	1.39849	0	0	0	0	0	0	0	0	0	0	0	0	0	0	0	0	0	0	0	0	0	0	0	0	0
hsa-miR-6512-5p	0	0	0	0	0.364741	0.618487	0.832296	0	0	0	0	0	0	0	0	0	0.750564	0	0	0	0	0.666919	0	0	1.26451	1.34598	0.606794	0	0	0	0	0	0	0	0	1.65598	0	0	0	0
hsa-miR-1912-3p	0	0	0	0	0	0	0	0	0	0	0	0	0	0	0	0	0	0	0	0	0	0	0	0	0	0.672989	0	0	0	0	0	0	0	0	0	0	0	0	0	0
hsa-miR-3130-5p	0	1.34682	0	0	0	0	0	0	0.939436	0	0	0	1.49052	1.45455	0	0	0	0	0	0	0.463121	0	1.08271	0	0	0.672989	0.303397	0	0	1.26397	0	0	1.45943	3.35563	0	0	0	0	0	1.6875
hsa-miR-7851-3p	0	0	0	0	0	0.618487	0	0	0	0	0	9.05067	0.745261	0	0	0	0	0	0.7738	0	0	0	0	0	0.632256	0	0	0	0	2.52794	0	0	0	0	0	0	0	0	0	0
hsa-miR-3939	0	0	2.23106	0	0	0	0	0	0	0	0	0	0	0	0	0	0	0	0	0	0	0	0	0.56837	0	0	0	1.09659	1.15159	0	0	0	0	0	0	0	0	0	0	0
hsa-miR-433-5p	0	0	0	0	0	0	0	0	0	0	0	0	0	0	0	0	0	0	0	0	0	0	0	0	0	0	0	0	0	0	0	0	0	0	0	0	0	0	0	0
hsa-miR-4637	0	0	0	0	0	0	0	0	0	0	0	0	0	0	0	0	0	0	0	0	0	0	0	0	0	0	0	0	0	0	0	0	0	0	0	0	0	0	0	0
hsa-miR-510-5p	0	0	0	0	4.74163	0.618487	0	0	3.75774	1.50493	0	0	0	0	0	0	1.50113	0	0	1.05629	2.3156	0	0	0.56837	0.632256	1.34598	0.606794	0	1.15159	2.52794	0	0	1.45943	0	0	0	2.44944	0	0	1.6875
hsa-miR-508-5p	0	2.69364	0	4.99448	10.5775	9.8958	0	0	0.939436	3.00986	1.7499	9.05067	3.7263	5.81821	1.39849	4.20426	2.25169	1.57236	8.5118	0	8.33617	3.33459	2.16543	4.54696	1.26451	1.34598	3.03397	4.38636	2.30317	1.26397	0	0	2.91887	1.67781	2.06775	0	3.67417	7.18399	5.28087	3.37499
hsa-miR-509-5p	0	1.34682	0	0	2.91792	0.618487	0	0	1.87887	1.50493	1.7499	0	0	1.45455	0	0	1.50113	1.57236	3.0952	1.05629	1.38936	0	1.08271	0	0.632256	1.34598	1.21359	0	0	0	2.23593	3.28035	0	1.67781	0	0	2.44944	0	0	0
hsa-miR-509-3-5p	0	0	0	2.49724	1.09422	0.618487	0	0	0	0	0	0	0	1.45455	0	0	0	0	0.7738	0	1.38936	0	0	0.56837	0	0	0.303397	0	1.15159	0	2.23593	0	0	0	0	0	2.44944	0	2.64044	0
hsa-miR-9898	0	1.34682	0	0	0.364741	0.618487	0.832296	0	0	1.50493	0	0	0.745261	0	0	4.20426	0	0	0	0	0	0	0	0	0.632256	0	0.303397	0	0	0	0	0	0	0	0	0	0	0	0	0
hsa-miR-5003-3p	0	0	0	0	0	0	0	0	0	0	0	0	0	0	0	0	0	0	0	0	0	0	0	0	0	0	0	0	0	0	0	0	0	0	0	0	0	0	0	0
hsa-miR-6502-3p	0	0	0	0	0	0	0	0	0	0	0	0	0	0	0	0	0	0	0	0	0	0	0	0	0	0	0	0	0	0	0	0	0	0	0	0	0	0	0	0
hsa-miR-6863	0	6.7341	4.46212	0	11.6717	3.71092	4.16148	48.8331	0.939436	9.02958	8.7495	0	36.5178	4.36366	1.39849	8.40852	6.00452	18.8683	3.869	1.05629	0.926242	10.6707	6.49628	9.09393	1.26451	4.03793	5.76454	3.28977	4.60635	2.52794	8.94373	3.28035	7.29717	20.1338	6.20324	6.62392	22.045	47.8933	5.28087	3.37499
hsa-miR-6758-5p	0	0	0	0	1.09422	0	0	0	0	0	0	9.05067	0.745261	0	0	0	0	0	0	0	0	0	1.08271	0.56837	0	0	0	0	0	0	0	0	0	0	0	0	2.44944	0	0	0
[truncated: 634 more rows]

## Sheet: Table S2
Table S2. Quantitative PCR assay information for all assays and Normfinder stabilities in miRNAseq for the selected reference miRNAs. Micro RNA sequencing (miRNAseq).
Selected		NormFinder stability in miRNAseq	Other miRNA
Reference miRNA	GeneGlobe cat. no.	Stability/TPM average	Target or reference candidate	GeneGlobe cat. no.
hsa-miR-151a-3p	YP00204576	0.07	hsa-let-7f-5p	YP00204359
hsa-let-7b-5p	YP00204750	0.22	hsa-miR-107	YP00204468
hsa-miR-103a-3p	YP00204063	0.24	hsa-miR-10b-5p	YP00205637
hsa-miR-99b-5p	YP00205983	0.26	hsa-miR-1299	YP02114891
			hsa-miR-1306-5p	YP02105660
			hsa-miR-146a-5p	YP00204688
			hsa-miR-148a-3p	YP00205867
			hsa-miR-15a-5p	YP00204066
			hsa-miR-15b-5p	YP00204243
			hsa-miR-16-5p	YP00205702
			hsa-miR-184	YP00204601
			hsa-miR-187-3p	YP00204018
			hsa-miR-191-5p	YP00204306
			hsa-miR-192-5p	YP00204099
			hsa-miR-194-3p	YP00204204
			hsa-miR-195-5p	YP00205869
			hsa-miR-205-5p	YP00204487
			hsa-miR-210-3p	YP00204333
			hsa-miR-21-3p	YP00204302
			hsa-miR-223-3p	YP00205986
			hsa-miR-224-5p	YP00204641
			hsa-miR-27b-3p	YP00205915
			hsa-miR-29c-3p	YP00204729
			hsa-miR-3065-5p	YP02106617
			hsa-miR-30a-3p	YP00204457
			hsa-miR-30a-5p	YP00205695
			hsa-miR-30b-5p	YP00204765
			hsa-miR-3135b	YP02114177
			hsa-miR-31-3p	YP00204079
			hsa-miR-31-5p	YP00204236
			hsa-miR-320c	YP00205706
			hsa-miR-335-5p	YP02119293
			hsa-miR-345-5p	YP00206006
			hsa-miR-34a-5p	YP00204486
			hsa-miR-374a-5p	YP00204758
			hsa-miR-375-3p	YP00204362
			hsa-miR-424-5p	YP00204736
			hsa-miR-425-3p	YP00204038
			hsa-miR-4286	YP02112356
			hsa-miR-4454	YP02114119
			hsa-miR-450b-5p	YP00205607
			hsa-miR-484	YP00205636
			hsa-miR-497-5p	YP00204354
			hsa-miR-508-3p	YP00204480
			hsa-miR-514a-3p	YP00205931
			hsa-miR-532-5p	YP00204221
			hsa-miR-660-5p	YP00205911
			hsa-miR-671-3p	YP00204024
			hsa-miR-7977	YP02101949
			hsa-miR-888-5p	YP00206024
			hsa-miR-891a-5p	YP00204220
			hsa-miR-891b	YP00204109
			hsa-miR-892a	YP00204092
			hsa-miR-892b	YP02110497
			hsa-miR-92a-3p	YP00204258
			hsa-miR-99b-3p	YP00204064

## Sheet: Table S3
Table S3. Raw count data from miRNAseq in the correlation study. Count data is expressed as counts per million (CPM) reads. Micro RNA sequencing (miRNAseq), before prostatectomy (Pre-RP), after prostatectomy (post-RP).
Name	uEV P33 pre-RP	uEV P33 post-RP	uEV HC11	pEV P33 pre-RP	pEV P33 post-RP	pEV HC11	pEV HC13	Plasma P33 pre-RP	Plasma P33 post-RP	Plasma HC11
hsa_let_7a_2_3p	16.5823	24.0609	10.5005	0	0	0	0	56.1608	8.76447	11.1702
hsa_let_7a_3p	191.21	170.336	70013.2	17.5289	0	0	12.7037	525.025	112.322	186.468
hsa_let_7a_5p	38870.4	55049.1	21208.9	50853.6	1161.25	26581.2	7369.51	5.99974e+07	84004.1	128562
hsa_let_7b_3p	1740.99	578.293	125.664	31.5015	0	57.7462	7.61093	333.473	40951.1	151.02
hsa_let_7b_5p	13309.4	69388.3	14643.4	1.51255e+06	5054.48	5327.84	7891.98	40606.3	25839.4	39656.6
hsa_let_7c_3p	2642.01	0	0	0	0	0	0	0	0	0
hsa_let_7c_5p	12271.8	61470	10178	4409.42	281374	24269.7	9547.26	143976	47990.7	162178
hsa_let_7d_3p	393.748	404227	410.412	723.038	66.6946	1016.68	531.657	2446.17	1958.56	30298.8
hsa_let_7d_5p	3204.2	7095.04	5913.52	1924.87	142.42	63546	6345.48	50700.4	9868.96	35980
hsa_let_7e_3p	9.62436	19.5478	35.0579	0	0	0	0	18.6546	4.14558	5284.02
hsa_let_7e_5p	4483.18	28297.4	103280	3909.28	620.771	5.17966e+06	6972.34	217412	41875	47219.8
hsa_let_7f_1_3p	70.4748	226.172	99.7548	69.9549	0	47.639	5284.02	2330.68	280.463	209.44
hsa_let_7f_2_3p	172.555	156.288	62087.2	17.5289	0	0	12.7037	435.771	112.322	159.83
hsa_let_7f_5p	28125.2	38516.5	14838	32910.3	732.194	19845.5	4590.93	5.13844e+07	57128	108592
hsa_let_7g_3p	28.0804	9.32731	11.1702	0	0	0	3.80546	38.1112	0	0
hsa_let_7g_5p	5722.78	27608.1	7938.2	682959	1740.99	4994.19	3739.06	58207.7	20294.2	43296.4
hsa_let_7i_3p	1321	84.2413	4.81218	6.35187	0	0	3.51209	98.9421	13.9627	37.3093
hsa_let_7i_5p	69.8705	645.781	372.281	304.387	10568	3502.41	795.951	28666.2	7835.45	21499.3
hsa_miR_1_3p	0	0	0	0	0	35.0579	0	735.782	101.056	2414.92
hsa_miR_100_5p	30.4437	41.2871	41.9729	0	0	0	17.5289	0	0	0
hsa_miR_101_3p	9.62436	8.37762	70.1158	0	0	10.5005	56.1608	83.9458	8.29115	10568
hsa_miR_101_5p	3.51209	0	56.1608	0	0	0	0	0	0	6.35187
hsa_miR_103a_2_5p	0	9.62436	5.25025	0	0	0	0	224.643	17.5289	16.7552
hsa_miR_103a_3p	32.6456	26.3407	25099.1	394.401	8.29115	231.781	123.861	4541.47	6430.42	1552.63
hsa_miR_103b	61.3513	62.1836	60.3427	1263.62	9.32731	315.854	108.909	1.14267e+06	1202.31	1963.37
hsa_miR_106a_5p	224.643	41.9729	53.0582	94.5046	35.0579	365.726	79.9148	2569.33	284016	614.615
hsa_miR_106b_3p	10.5005	43.8224	0	7926.02	0	33.3648	0	231.781	107.982	219.716
hsa_miR_106b_5p	0	0	0	6.35187	0	0	0	76.1093	8.37762	83.9458
hsa_miR_107	22.2315	73.5035	33.3648	125.664	2642.01	382.42	161.677	4022.98	863.84	3400.62
hsa_miR_10a_3p	16.7552	19815.1	41.4558	0	0	0	0	0	9.62436	0
hsa_miR_10a_5p	414.796	743.169	783.494	14.4365	0	0	0	58.0381	0	31.5015
hsa_miR_10b_3p	9.62436	11.1702	87.6447	0	0	0	0	0	8.29115	0
hsa_miR_10b_5p	198.433	1468.91	5616.08	24.8735	0	0	0	43.8224	0	12.7037
hsa_miR_1178_3p	0	0	0	4.66366	0	0	0	0	0	0
hsa_miR_1179	0	0	0	0	0	0	0	10.5005	0	0
hsa_miR_1180_5p	0	8.29115	0	0	0	0	0	0	0	0
hsa_miR_1181	28.0804	0	0	0	0	0	0	0	0	0
hsa_miR_1185_1_3p	0	0	0	0	0	3.51209	9.62436	136.834	44.4631	33.1646
hsa_miR_1185_2_3p	0	0	0	0	0	8.29115	3.51209	178.857	33.5105	37.3093
hsa_miR_1197	0	0	0	0	0	0	0	4.81218	0	0
hsa_miR_1207_3p	0	0	0	0	3.17593	0	0	0	0	0
hsa_miR_1207_5p	0	0	0	0	0	0	0	0	0	5.25025
hsa_miR_122_3p	0	0	0	3.51209	0	0	0	27.9819	41.4558	2642.01
hsa_miR_122_5p	3.51209	0	0	29.019	9.62436	13210	0	1349.73	2070.66	701.881
hsa_miR_1224_3p	8.29115	0	0	4.66366	0	3.17593	2642.01	56.1608	8.76447	0
hsa_miR_1224_5p	0	0	0	0	0	0	0	5.25025	0	0
hsa_miR_1225_3p	35.0579	0	0	0	0	0	0	0	0	0
hsa_miR_1225_5p	0	4.66366	0	0	0	0	0	0	0	0
hsa_miR_1226_3p	0	52.5868	0	2642.01	0	3.51209	0	16.7552	6.35187	16.5823
hsa_miR_1226_5p	0	28.0804	0	0	0	0	0	0	0	0
hsa_miR_1227_3p	3.17593	10.5005	0	2.79254	0	0	4.14558	43.3096	7.61093	78.8803
hsa_miR_1227_5p	47.4732	21136.1	82.9115	79.9148	34.9353	157.761	60.6275	31.6088	62.5583	365.045
hsa_miR_1228_3p	3.80546	0	0	0	0	0	0	0	0	0
hsa_miR_1228_5p	0	0	0	1.75604	0	0	0	0	4.14558	0
hsa_miR_1229_3p	7.02417	30.4437	56.1608	58.0381	19.2487	14531	21.001	815.096	139.91	177.852
hsa_miR_1233_3p	0	0	0	0	0	0	0	0	26.2934	0
hsa_miR_1234_3p	0	0	0	0	0	0	0	5.25025	0	0
hsa_miR_1237_3p	0	0	0	0	4.66366	0	0	0	0	0
hsa_miR_1237_5p	0	0	2.79254	0	0	4.81218	0	0	0	0
hsa_miR_1238_3p	5.25025	0	0	0	0	0	0	0	6.35187	0
hsa_miR_124_3p	0	56.1608	0	0	0	0	0	0	0	0
hsa_miR_1246	57.1668	246.762	38.633	47.4732	13210	233.183	91.2027	524.528	863.84	955.327
hsa_miR_1248	2.79254	1321	0	0	0	0	0	19.3165	0	0
hsa_miR_1249_3p	0	0	0	4.81218	0	0	17.5289	16.5823	0	0
hsa_miR_1250_3p	0	0	0	0	0	0	0	0	4.14558	0
hsa_miR_1250_5p	0	0	0	0	0	0	0	17.5289	0	0
hsa_miR_1251_5p	4.14558	0	0	0	0	0	0	0	0	0
hsa_miR_1254	0	0	0	8.76447	0	0	0	10.5005	0	0
hsa_miR_1255a	0	0	0	0	0	7.61093	0	0	0	0
hsa_miR_1255b_2_3p	0	0	0	0	0	9.62436	0	6.35187	0	1.75604
hsa_miR_1255b_5p	0	0	0	0	0	3.51209	0	5.58508	0	4.14558
hsa_miR_1256	0	0	0	0	0	0	0	7.61093	0	0
hsa_miR_125a_3p	6.35187	15.7508	3.51209	0	0	0	0	28.8731	7.61093	0
hsa_miR_125a_5p	1080.71	1.81506e+06	3241.84	144.608	28.5834	289.228	51.3002	732.27	307.98	5279.12
hsa_miR_125b_5p	232.133	558.964	923.404	9.62436	0	56.1608	0	87.0571	3.51209	47.2523
hsa_miR_126_3p	14.4365	5.58508	0	107.119	30.4437	1821.84	1656.74	16290.2	2309.09	1.24174e+06
hsa_miR_126_5p	8.78022	49.471	140.402	3092.6	370.538	1.06869e+06	1659.08	155394	5018.09	28913.7
hsa_miR_1260a	32965.6	71100	74627.1	1338.47	2867.62	625.659	166446	46136.1	5968.61	2627.78
hsa_miR_1260b	26909.3	18819.5	1.13567e+07	1551.31	3163.07	376.993	289.01	6746.58	15051.1	2975.87
hsa_miR_1261	2156.06	2122.53	2410.53	449.287	0	76.1093	25.1329	356671	294.014	784.385
hsa_miR_1266_5p	0	0	2.79254	0	0	0	0	0	0	0
hsa_miR_1267	0	0	0	0	0	0	0	0	6.35187	0
hsa_miR_1268a	305152	505.448	139.553	66.6946	105.005	62.1836	54.4373	76.1093	80.9836	37.3093
hsa_miR_1268b	0	5.25025	1.75604	2.79254	0	4.66366	8.29115	4.81218	7.61093	8.76447
hsa_miR_1269a	11.1702	0	0	0	0	0	0	0	0	0
hsa_miR_1269b	15.2219	0	0	0	0	0	0	0	0	0
hsa_miR_127_3p	0	0	0	3.51209	7.61093	21.001	0	181.883	82.9115	13210
hsa_miR_127_5p	0	0	0	0	0	2642.01	0	333.05	9.32731	0
hsa_miR_1270	0	0	0	0	0	0	0	56.1608	0	0
hsa_miR_1271_3p	0	0	2642.01	0	0	0	0	5.25025	0	0
hsa_miR_1271_5p	0	0	0	0	0	0	0	5284.02	0	0
hsa_miR_1273a	0	0	0	10.5005	0	0	7.61093	0	0	0
hsa_miR_1273c	10.5005	0	7.61093	15852	168.483	3.51209	33.6853	0	31.7593	0
hsa_miR_1273d	0	56.1608	4.81218	15.8797	57.7528	0	15.8044	0	11.1702	9.32731
hsa_miR_1273e	12.7037	10.5005	1.75604	94.9463	34346.1	23.3183	306.773	43.3096	95.1366	52.5868
hsa_miR_1273f	80.9836	34346.1	49.7469	1221.55	1067.11	219.112	2271.2	101.851	1198.23	2049.87
hsa_miR_1273g_3p	56895.5	62648.5	27203.1	13397.1	5007.02	33640.3	23068.1	29603.6	7558.01	16596.1
hsa_miR_1273g_5p	0	0	0	5.26813	11.4164	0	56.1608	4.66366	0	0
hsa_miR_1273h_3p	0	0	28.0804	33.1646	48.1218	1321	52.5025	26.2934	46.6366	15.8797
hsa_miR_1273h_5p	4.14558	19.2487	5.25025	125.919	42.145	6.35187	48877.1	505.448	201.583	39.0956
hsa_miR_1275	69.9549	38.633	31704.1	96.4092	53.8925	39.0956	57.1668	189.009	1010.9	68.4984
hsa_miR_1277_3p	0	0	0	0	0	0	0	10568	0	0
hsa_miR_1277_5p	28.0804	0	5.58508	0	87.6447	9.62436	0	0	0	0
hsa_miR_1279	10.5005	35.0579	7.61093	1321	112.322	1.75604	62.5583	0	0	4.14558
hsa_miR_128_1_5p	0	0	9.62436	0	0	0	0	0	0	0
hsa_miR_128_3p	0	52.5025	7.02417	0	0	0	0	259.858	7.61093	61.3513
hsa_miR_1281	742.815	117569	551.362	270.188	177.852	420.695	513.002	101.851	192.487	1656.74
hsa_miR_1282	22.8328	12.7037	4.66366	235.797	33.5105	1067.06	359.343	66.3292	24.5846	26.2513
hsa_miR_1285_3p	4.81218	5.58508	0	33.3648	53.2765	21.001	898.574	13.991	53.8925	6605.02
hsa_miR_1285_5p	93.0703	369.13	589.689	373.102	461.969	30383.1	782.288	333.05	377.756	82.5743
hsa_miR_1290	107.785	380.162	315.015	666.903	368.769	1391.06	239102	33836.9	32936.9	4026.84
hsa_miR_1291	0	0	0	0	0	0	0	10.5005	0	0
hsa_miR_1292_3p	17.5289	0	0	0	0	0	2.79254	0	0	9.62436
hsa_miR_1292_5p	0	0	0	0	0	0	0	6.35187	0	0
hsa_miR_1294	0	0	0	0	0	3.51209	0	5.58508	0	0
hsa_miR_1295b_3p	0	0	0	0	0	0	0	0	2.79254	0
hsa_miR_1296_3p	0	0	0	0	0	9.32731	0	0	0	0
hsa_miR_1296_5p	5.58508	0	8.29115	0	0	0	0	0	0	0
hsa_miR_1297	34.2492	117.51	200.537	4.81218	11.1702	56.1608	26.2934	356.52	7.02417	152.257
hsa_miR_1301_3p	0	0	0	0	0	0	0	55.9639	16.5823	7926.02
hsa_miR_1301_5p	0	0	0	0	0	0	0	0	9.32731	0
hsa_miR_1303	25142.9	39955.5	13330.4	5918.18	1197.62	1857.92	1.26816e+06	105049	13830.3	5883.88
hsa_miR_1304_3p	0	0	0	0	4.14558	5.58508	0	42.002	0	0
hsa_miR_1304_5p	0	0	0	28.0804	9.32731	0	11.1702	1321	10.5005	0
hsa_miR_1306_3p	0	4.66366	0	0	0	0	0	6.35187	2642.01	1.75604
hsa_miR_1306_5p	36.7518	35.0579	15.2219	5284.02	0	7.02417	9.62436	78.1911	22.2315	132.658
hsa_miR_1307_3p	9247.03	168.483	81.8071	38.1112	0	95.3482	10.5363	258.772	80.9836	107.264
hsa_miR_1307_5p	6.35187	0	0	0	0	0	0	0	0	0
hsa_miR_130a_3p	25.1329	39630.1	53.8925	22.8328	6.35187	280.463	65.2912	2295.15	1049.06	6598.9
hsa_miR_130a_5p	0	0	9.32731	0	0	0	0	0	0	0
hsa_miR_130b_3p	24.0609	16.7552	96.4092	8.78022	7.61093	141.757	252.724	4010.75	609.4	221929
hsa_miR_130b_5p	3.51209	7.61093	56.1608	16.5823	9.62436	13210	42.002	1025.44	74.6185	215.964
hsa_miR_132_3p	0	0	21.001	0	0	0	0	168.483	0	11.1702
hsa_miR_1321	0	3.51209	0	0	8.29115	0	0	0	0	0
hsa_miR_1322	0	0	0	56.1608	13.991	0	0	0	0	0
hsa_miR_133a_3p	0	0	0	0	0	0	0	3.17593	0	0
hsa_miR_133b	0	0	0	0	0	0	0	2.79254	0	0
hsa_miR_134_5p	0	0	0	19.0556	0	12.4367	3.51209	441.434	161.967	55.9639
hsa_miR_1343_3p	0	0	0	5.58508	0	18.6546	0	28.8731	7.61093	17.5289
hsa_miR_135a_5p	47.4732	130779	310.918	0	0	0	0	0	0	84.2413
hsa_miR_135b_5p	49.471	222.315	289.147	0	0	0	0	0	0	15.7508
hsa_miR_136_3p	0	0	0	1.75604	0	0	0	65.2912	0	0
hsa_miR_136_5p	0	0	0	0	0	0	0	52.5868	9.32731	0
hsa_miR_138_5p	8.29115	0	0	0	0	0	0	0	0	0
hsa_miR_139_3p	0	0	0	52.5868	0	2.79254	6.35187	42.002	28.0804	15.2219
hsa_miR_139_5p	0	0	0	84.2413	0	7.61093	11.1702	76618.2	68.2533	110.68
hsa_miR_140_3p	168.483	83.9458	27.9254	94.5046	17.5289	168.426	53.2765	759.048	72655.2	233.554
hsa_miR_140_5p	0	43.8224	22.8328	0	0	3.51209	9.62436	55.8508	12.7037	58.0381
hsa_miR_141_3p	0	477.367	221.36	0	10.5005	0	0	30.4437	0	0
hsa_miR_142_3p	0	0	0	16.7552	5284.02	265.828	12.4367	1318.54	22.8328	622.278
hsa_miR_142_5p	0	0	0	41.8601	6.35187	201.583	9.32731	270.431	86.6193	982.815
hsa_miR_143_3p	0	0	0	38.4974	0	365.045	0	406.266	24.5846	110.255
hsa_miR_143_5p	0	0	0	0	0	0	0	9.32731	0	0
hsa_miR_144_3p	0	0	0	0	0	2642.01	0	0	9.32731	6.35187
hsa_miR_144_5p	0	0	0	9.32731	3.51209	0	0	336.965	0	16.7552
hsa_miR_145_3p	0	0	0	0	0	0	0	0	0	7.61093
hsa_miR_145_5p	0	0	0	533.528	0	68.4984	11.1702	174373	157.508	173.239
hsa_miR_1468_5p	0	9.32731	0	0	0	0	0	0	0	3.51209
hsa_miR_146a_3p	0	0	0	0	0	0	0	11.1702	0	0
hsa_miR_146a_5p	19815.1	1488.26	76.9949	406.52	21.001	990.793	119.411	5704.39	625.529	3003.4
hsa_miR_146b_3p	0	0	0	0	0	0	0	9.62436	0	0
hsa_miR_146b_5p	33.5105	47556.1	87.0571	281.604	0	1200.73	181.883	1555.85	712.203	10839
hsa_miR_148a_3p	3.80546	9.5278	69.9549	0	0	0	35.0579	161.677	7.02417	57.7528
hsa_miR_148a_5p	0	0	0	0	0	0	0	9.32731	0	0
hsa_miR_148b_3p	3.51209	0	336.965	0	0	0	21.001	604.749	18.6546	44.4631
hsa_miR_148b_5p	0	0	0	0	0	0	0	280.804	17.5289	11.1702
hsa_miR_149_3p	0	0	5284.02	0	0	0	0	0	0	0
hsa_miR_149_5p	43.8224	45.6013	92.1021	0	0	0	0	0	0	0
hsa_miR_150_3p	0	0	0	0	17.5289	0	0	0	0	7.02417
hsa_miR_150_5p	0	17.5289	0	215324	814.332	133.459	404.223	851.725	177.852	526.488
hsa_miR_151a_3p	171731	9154.22	712.203	419.223	10.5005	795.951	82.534	7732.7	605.981	5857.55
hsa_miR_151a_5p	107.982	498.774	173.848	64.2284	2642.01	237.847	74.6204	2819.94	597.458	3093.86
hsa_miR_151b	106.116	141347	426.994	87.5257	6.35187	499.575	93.2731	1109.82	798.822	10586.3
hsa_miR_152_3p	3.80546	0	23.3183	0	0	0	35.0579	306.773	7.02417	68.2533
hsa_miR_153_3p	0	0	0	0	0	0	0	9.32731	0	0
hsa_miR_1537_5p	0	0	0	0	0	0	0	17.5289	9.32731	6.35187
hsa_miR_154_3p	0	0	0	9.32731	0	0	0	0	0	0
hsa_miR_154_5p	0	0	0	0	0	0	0	157.508	336.965	22.8328
hsa_miR_155_3p	0	0	0	0	0	0	0	2642.01	0	0
hsa_miR_155_5p	0	0	0	0	0	0	0	0	0	3.51209
hsa_miR_1587	10.5005	17.5289	15.2219	0	0	1.75604	0	5.58508	0	4.14558
hsa_miR_15a_3p	0	0	0	0	0	0	0	60.8874	0	9.32731
hsa_miR_15a_5p	0	0	0	0	0	0	0	28.8731	0	17.5289
hsa_miR_15b_3p	5.58508	13210	24.8735	22.8328	0	131.467	9.32731	161.556	57.7462	898.574
hsa_miR_15b_5p	0	6.35187	23.3183	0	0	56.1608	0	679.874	29.8527	246.762
hsa_miR_16_2_3p	9.62436	11.1702	0	0	0	0	0	191.21	8.29115	29062.1
hsa_miR_16_5p	3.51209	41.8601	477.367	16.5823	0	2642.01	21.001	2015.83	102.6	276.306
hsa_miR_17_3p	8.29115	0	0	0	0	0	0	758.171	8.76447	39.0956
hsa_miR_17_5p	37.3093	21.0725	35667.1	254.17	16.5823	242.951	66.6946	5034.99	7216.67	1571.66
hsa_miR_181a_2_3p	0	8.29115	0	0	0	7.61093	0	2642.01	0	0
hsa_miR_181a_3p	0	0	0	0	0	0	0	0	0	3.51209
hsa_miR_181a_5p	0	17.5289	3.80546	2642.01	0	17.5604	28.8731	134.042	53.9909	116.076
hsa_miR_181b_2_3p	0	112.322	0	0	0	0	0	0	0	0
hsa_miR_181b_3p	0	21.001	0	0	0	0	0	0	0	0
hsa_miR_181b_5p	0	5284.02	16.5823	0	0	35.0579	0	17.5604	38.4974	140.402
hsa_miR_181c_3p	0	0	0	0	0	0	0	8.29115	0	10.5005
hsa_miR_181c_5p	0	0	0	1.75604	3.80546	15.7508	0	139.91	8.29115	34346.1
hsa_miR_181d_3p	0	0	84.2413	0	0	0	0	0	0	0
hsa_miR_181d_5p	0	19.2487	21.001	0	0	12.7037	0	112.322	43.8224	5.58508
hsa_miR_182_5p	0	0	0	0	0	0	0	10.5005	0	0
hsa_miR_1825	0	8.29115	0	28.0804	0	7.61093	0	3963.01	0	4.81218
hsa_miR_1827	28136.6	13641.2	3736.42	1622.33	455.753	7511.81	1373.77	54524.4	2.84016e+06	17140.7
hsa_miR_183_5p	21.001	166.525	22.8328	0	0	3.51209	0	5.58508	6.35187	87.0571
hsa_miR_184	2642.01	112.322	0	0	31.5015	0	0	0	0	0
hsa_miR_185_3p	0	0	0	0	0	0	16.5823	43.3096	15.2219	131.467
hsa_miR_185_5p	0	2642.01	33.1646	72.3038	0	744.98	83.9458	776.171	510.091	5307.2
hsa_miR_186_3p	0	0	0	0	0	0	0	8.29115	0	0
hsa_miR_186_5p	24.0609	30.7179	166.525	52.6813	0	614.28	1095.14	1072.64	310.918	178336
hsa_miR_187_3p	0	7.61093	56.1608	0	0	0	0	0	0	0
hsa_miR_188_3p	8.29115	0	0	0	0	0	0	56.1608	0	0
hsa_miR_188_5p	27.9819	10.5363	0	0	0	0	0	21.001	56.1608	0
hsa_miR_18a_3p	17.5289	0	0	0	0	0	0	7926.02	0	0
hsa_miR_18a_5p	0	0	5.58508	0	0	0	0	31.7593	2642.01	0
hsa_miR_18b_3p	10.5005	0	0	0	0	0	0	0	0	0
hsa_miR_18b_5p	0	0	9.62436	0	0	0	0	22.8328	5.58508	0
hsa_miR_1908_5p	0	10.5005	0	30.7179	2642.01	55.9639	16.5823	202.112	159.83	385.637
hsa_miR_190a_3p	5.58508	2642.01	0	0	0	0	0	0	0	0
hsa_miR_190a_5p	7.61093	0	18.6546	0	0	56.1608	0	4.14558	0	21.001
hsa_miR_190b	0	0	0	0	0	0	0	41.9729	8.29115	0
hsa_miR_191_3p	0	0	0	0	0	0	0	219.112	65.2912	41.2871
hsa_miR_191_5p	389.684	1588.02	2178.86	797.485	14.0483	1102.05	89828.3	92468.8	6143.9	2926.58
hsa_miR_1910_3p	4.66366	0	0	0	0	0	0	0	0	0
hsa_miR_1913	0	8.29115	3.17593	0	9.32731	0	0	0	0	0
hsa_miR_1914_5p	0	0	0	0	0	0	7.61093	0	0	0
hsa_miR_1915_3p	5.25025	0	0	0	0	0	0	0	0	0
hsa_miR_192_3p	0	0	9.62436	0	0	0	0	0	0	0
hsa_miR_192_5p	165.149	1312.56	233.554	0	0	9.32731	8.29115	76.9949	22.8328	17.5289
hsa_miR_193a_5p	16.7552	15852	62.1836	0	0	35.0579	0	7.02417	67.3705	224.643
hsa_miR_193b_3p	0	31.7593	23.3183	0	0	0	0	0	0	0
hsa_miR_193b_5p	24.0609	22.3403	52.5868	0	7.61093	0	0	0	16.5823	0
hsa_miR_194_3p	0	19.0273	56.1608	0	0	0	0	0	0	0
hsa_miR_194_5p	485.032	2170.29	1155.06	0	0	0	0	252.724	0	16.7552
hsa_miR_195_5p	9.32731	21.0725	27741.1	35.0579	0	5.58508	6.35187	1018.55	449.287	323.464
hsa_miR_196a_5p	508.339	1115.16	222.315	56.1608	0	22.8328	0	31704.1	31.5015	9.62436
hsa_miR_196b_5p	1516.34	1044.66	192.685	10.5005	0	28.8731	0	101.63	7926.02	1.75604
hsa_miR_197_3p	0	0	7.61093	2642.01	0	3.51209	0	33.5105	38.1112	58.0381
hsa_miR_197_5p	0	0	0	0	0	0	0	0	0	9.32731
hsa_miR_1972	0	5.25025	3.51209	0	3963.01	0	37.3102	14.4365	22.8328	26.2934
hsa_miR_1973	2.79254	0	20.7279	841.008	238.195	3348.03	2690.93	797.244	1722.76	5279.12
hsa_miR_1976	0	3.17593	9.32731	0	0	196.563	0	12.4367	0	15.7508
hsa_miR_199a_3p	0	0	0	21.0725	3.80546	309.765	645.85	1986.72	169.969	215324
hsa_miR_199a_5p	1.75604	0	0	41.4558	0	40951.1	31.5015	3251.62	139.91	581.196
hsa_miR_199b_3p	0	0	0	55.9639	1.75604	187.38	30383.1	11962.3	359.343	455.184
hsa_miR_199b_5p	0	0	0	70.1158	0	58.6433	12.7037	1207.56	308.885	452.85
hsa_miR_19a_3p	113.938	111.931	365.232	280.804	9.32731	83.7202	27.9254	232497	94.5046	255.046
hsa_miR_19a_5p	0	0	0	0	0	0	0	6.35187	0	0
hsa_miR_19b_1_5p	0	0	0	0	0	0	0	5.58508	0	0
hsa_miR_19b_3p	21136.1	1038.98	572.649	31.7593	10.5005	87.0571	17.5604	787.731	72.606	275.156
hsa_miR_200a_3p	6.35187	78.7538	89.5582	0	2642.01	0	0	38.4974	0	0
hsa_miR_200a_5p	5.58508	21136.1	82.9115	0	0	0	0	0	0	0
hsa_miR_200b_3p	894.284	1940.5	3115.32	4.81218	11.1702	0	0	41.4558	3.51209	63.003
hsa_miR_200b_5p	182.863	248.536	727.451	0	0	0	0	0	8.29115	0
hsa_miR_200c_3p	345.941	1959.81	15191.5	8.29115	9.62436	0	0	78.8803	9.32731	44.4631
hsa_miR_200c_5p	0	9.62436	21.001	0	0	0	0	0	0	0
hsa_miR_203a_3p	205.201	110.631	129458	0	8.29115	0	0	0	0	0
hsa_miR_203b_5p	376.872	261.171	301.714	0	9.32731	0	0	0	0	0
hsa_miR_204_3p	0	46.6366	11.1702	0	0	0	0	0	0	0
hsa_miR_204_5p	1186.56	5863.43	780.12	0	0	0	4.81218	0	0	0
hsa_miR_205_3p	0	0	4.81218	0	0	0	5.26813	0	0	0
hsa_miR_205_5p	28.5834	115.506	71.9978	0	0	0	0	0	0	0
hsa_miR_2054	0	0	0	0	3.17593	0	0	0	0	0
hsa_miR_206	0	6.35187	0	0	0	0	0	0	3.51209	0
hsa_miR_208b_3p	0	0	0	0	0	0	0	0	0	1321
hsa_miR_20a_3p	0	7.61093	0	0	0	0	0	87.6447	0	6.35187
hsa_miR_20a_5p	20.7279	52.934	94.5046	60.6275	3.51209	165.149	27741.1	16399	1428.61	720.475
hsa_miR_20b_3p	9.32731	0	2642.01	0	0	0	0	0	0	0
hsa_miR_20b_5p	43.8224	53.8925	66.6946	336.965	18.6546	194.079	53.0582	767503	861.042	1227.11
hsa_miR_21_3p	0	0	11.1702	10.5005	0	0	0	73.0465	2642.01	19.3165
hsa_miR_21_5p	346.517	1682.78	802.953	21136.1	112.322	79.022	96.2436	5347.71	187.38	3486.43
hsa_miR_210_3p	13210	280.804	72.1827	0	0	8.29115	0	106.553	5.58508	55.9639
hsa_miR_210_5p	6.35187	0	3.51209	0	0	0	0	0	0	0
hsa_miR_211_5p	329.52	482166	422.849	0	0	0	4.66366	0	0	0
hsa_miR_2110	0	12.7037	0	9.62436	0	0	0	0	3.51209	10.5005
hsa_miR_212_3p	0	0	0	0	0	0	0	0	8.29115	0
hsa_miR_214_3p	0	0	0	0	0	0	0	0	46.6366	0
hsa_miR_214_5p	0	0	0	0	0	6.35187	0	140.402	0	5.58508
hsa_miR_215_5p	237.847	398.622	167768	0	0	5.58508	6.35187	78.7538	140.402	0
hsa_miR_219a_5p	0	0	0	0	0	0	0	2642.01	0	0
hsa_miR_219b_3p	0	0	0	0	0	0	0	6.35187	0	0
hsa_miR_22_3p	31.5015	105.174	76.1093	7926.02	0	7.02417	4.81218	265.291	38.1112	128.513
hsa_miR_22_5p	2642.01	252.724	19.2487	0	0	16.5823	0	209.301	16.7552	102.6
hsa_miR_221_3p	28.5834	63.003	17.5604	114.494	2642.01	694.885	248.735	6140.34	1811.4	5547.91
hsa_miR_221_5p	0	0	0	0	0	0	0	0	0	112.322
hsa_miR_222_3p	22.8328	57.1668	205.201	57.7462	5.58508	870.493	26.2934	1314.15	115.899	871.542
hsa_miR_222_5p	9.62436	5.58508	35.0579	0	0	0	0	9.32731	0	0
hsa_miR_223_3p	0	0	0	1989.88	19.2487	1.42933e+06	467.273	35075.4	1436.41	5805.61
hsa_miR_223_5p	0	0	0	9.32731	0	92.1021	0	2808.04	148.996	231.781
hsa_miR_224_3p	0	0	0	0	0	0	0	0	56.1608	0
hsa_miR_224_5p	70.1158	24.8735	57.1668	112.322	0	159.83	27.9254	136063	152.257	202.112
hsa_miR_2276_3p	56.1608	0	0	0	0	0	0	0	0	0
hsa_miR_2278	0	0	0	0	0	0	0	11.1702	12.7037	0
hsa_miR_2355_3p	0	0	0	0	0	0	0	22.8328	0	23.3183
hsa_miR_2355_5p	0	0	0	0	0	0	0	19.2487	0	0
hsa_miR_2392	19.5478	9247.03	149.241	1054.11	82.5743	4206.95	3987.43	1936.92	1910.44	18308.4
hsa_miR_23a_3p	3489.61	8609.96	4882.85	5086.47	167.552	31871.3	4093.01	59414.4	3966.9	37602.3
hsa_miR_23a_5p	0	11.1702	0	3.51209	7.61093	63.003	112.322	97.9368	41.4558	15852
hsa_miR_23b_3p	1619.07	10480.2	29568.7	4319.69	293.543	1.48613e+06	2425.62	124412	10413.9	22523.7
hsa_miR_23b_5p	0	19.2487	10.5005	9.32731	0	0	0	140.402	17.5289	5.58508
hsa_miR_23c	2807.52	3352.29	787318	2147.3	103.639	622.736	327.121	16149.8	12215	5460.84
hsa_miR_24_1_5p	0	0	6.35187	0	0	0	0	10568	0	0
hsa_miR_24_2_5p	56.1608	0	0	0	0	9.62436	0	60.3427	0	10.5363
hsa_miR_24_3p	456.772	2901.04	1381.38	109643	308.885	663.784	514.903	9416.44	2531.22	5749.91
hsa_miR_25_3p	101717	5222.96	991.309	514.501	204.76	1500.7	173.848	9624.02	2493.74	4048.05
hsa_miR_25_5p	0	0	0	0	0	9.32731	0	19.2487	15.2219	0
hsa_miR_26a_1_3p	0	2642.01	0	7.61093	0	43.8224	0	10.5363	9.62436	224.643
hsa_miR_26a_2_3p	0	3.17593	0	38.4974	0	224.643	0	16.5823	0	10.5005
hsa_miR_26a_5p	48.1218	92.1538	701.158	0	0	78.7538	168.483	718.203	49.7469	55482.2
hsa_miR_26b_3p	8.78022	53.2765	224.643	24.8735	9.62436	2642.01	21.001	490.81	37.3093	123.861
hsa_miR_26b_5p	53.8925	293.543	535.526	0	0	57.1668	6605.02	5531.84	131.467	150.797
hsa_miR_27a_3p	46.6366	96.5824	116248	17.5289	8.29115	27.9254	12.7037	1165.56	477.367	342.492
hsa_miR_27a_5p	0	8.29115	12.7037	0	0	0	0	0	0	0
hsa_miR_27b_3p	224.643	261.165	245.743	10.5005	0	38.4974	15.2219	670.122	22457.1	152.776
hsa_miR_27b_5p	0	35.0579	15.2219	0	0	0	0	19.5478	19.0556	12.4367
hsa_miR_28_3p	56803.2	2162.19	428.284	38.1112	10.5005	124.367	28.0967	879.062	220.611	522.33
hsa_miR_28_5p	6.35187	52.5025	21.0725	0	0	37.3093	0	259.858	22.8328	227.876
hsa_miR_2861	13.9627	1321	24.8735	0	3.17593	17.5289	0	1.75604	0	0
hsa_miR_299_3p	0	0	0	0	0	0	0	24.8735	0	0
hsa_miR_299_5p	0	0	0	0	0	0	0	55.9639	0	7926.02
hsa_miR_29a_3p	31.6088	521.349	9406.94	58.0381	0	6605.02	31.5015	3234.09	265.828	238.195
hsa_miR_29a_5p	0	0	0	0	0	0	0	56.1608	0	0
hsa_miR_29b_1_5p	0	3.51209	6605.02	0	0	0	0	21.001	112.322	22.8328
hsa_miR_29b_2_5p	0	16.5823	47.639	0	0	0	0	6605.02	47.2523	67.3705
hsa_miR_29b_3p	589.689	396.411	304.387	21.001	0	19.2487	0	88.9262	2642.01	8.78022
hsa_miR_29c_3p	388.519	2313.82	1583.07	29062.1	0	10.5363	0	787.496	158.797	281.899
hsa_miR_29c_5p	13210	673.93	96.2436	6.35187	0	41.4558	3.51209	190.273	22.3403	158.564
hsa_miR_301a_3p	0	0	0	0	0	13.991	0	91.4314	15.2219	0
hsa_miR_301a_5p	0	0	0	0	0	0	0	3.51209	0	0
hsa_miR_301b_3p	0	0	0	0	0	84.2413	0	53.8925	3.51209	0
hsa_miR_302e	4.81218	0	8.76447	0	0	0	28.0804	0	0	1321
hsa_miR_302f	7.02417	0	84.2413	4.14558	0	1321	5.25025	26.2934	13.991	9.5278
hsa_miR_3064_3p	0	9.62436	0	0	0	0	0	0	0	0
hsa_miR_3065_5p	0	0	0	0	0	0	0	52.5025	0	15.2219
hsa_miR_3074_3p	0	0	12.7037	0	0	0	0	10568	0	0
hsa_miR_3074_5p	2527.24	1576.32	1019.28	446.272	96.4092	1828.63	407.185	10804.5	1.06473e+06	2453.19
hsa_miR_30a_3p	2630.38	13304.5	3230.84	21136.1	56.1608	26.3407	19.2487	851.725	82.5743	368.956
hsa_miR_30a_5p	10568	1516.34	346.477	15.8797	0	8.29115	0	102.748	11.1702	32.6456
hsa_miR_30b_3p	0	15.7508	3.51209	0	0	9.32731	8.29115	139.553	72.3038	105.174
hsa_miR_30b_5p	33.5105	52840.2	319.209	7.61093	3.17593	52.5868	18.6546	114.143	0	421.206
hsa_miR_30c_1_3p	7.61093	6.35187	9.32731	19.2487	0	0	0	78.7659	3.51209	31.5015
hsa_miR_30c_2_3p	81.8071	50.2657	122.703	0	0	0	0	0	0	0
hsa_miR_30c_5p	208.969	1423.24	14068.3	45.6013	0	25099.1	31.5015	1209.5	88.6095	174.676
hsa_miR_30d_3p	1069.56	3142.35	1706.33	0	0	0	0	168.483	35.0579	0
hsa_miR_30d_5p	46.6366	84.2901	76618.2	43.8224	0	16.7552	0	126.006	112.322	22.8328
hsa_miR_30e_3p	4093.01	5700.17	2445.47	505.448	13.991	60.8874	11.1702	441215	136.507	461.969
hsa_miR_30e_5p	112.322	130.582	97.7389	21.001	0	9.62436	0	79.3984	5284.02	12.2923
hsa_miR_31_3p	5.25025	43.8224	0	0	0	0	0	0	0	0
hsa_miR_31_5p	2642.01	449.287	125.117	0	0	0	0	0	0	0
hsa_miR_3120_3p	0	0	0	0	0	9.32731	0	28.8731	0	17.5289
hsa_miR_3120_5p	5.58508	0	0	0	0	0	9.32731	0	19.2487	0
hsa_miR_3123	72.3038	53.9909	391.747	5187.53	335.105	36308	18247.6	14903.3	2936.1	10463.8
hsa_miR_3135b	7632.12	5487.34	18677.1	1085.23	437.628	4016.44	15107.3	11453.9	1720.41	2.32761e+06
hsa_miR_3138	0	0	0	0	0	0	0	17.5289	0	6.35187
hsa_miR_3141	16.5823	19.2487	31.5015	27.9819	12.2923	6.35187	13210	196.563	35.0579	16.7552
hsa_miR_3142	0	0	0	0	0	0	0	5.25025	0	0
hsa_miR_3144_5p	0	8.29115	0	0	0	3.80546	0	0	0	0
hsa_miR_3145_5p	28.0804	0	0	0	0	0	0	0	0	0
hsa_miR_3148	0	0	0	0	0	0	0	2.79254	0	0
hsa_miR_3150a_5p	2642.01	0	0	0	0	0	0	0	0	0
hsa_miR_3150b_3p	6.35187	0	0	0	0	0	0	0	0	0
hsa_miR_3151_3p	2.79254	0	0	0	0	0	0	0	0	0
hsa_miR_3154	0	0	0	0	0	0	17.5289	0	0	0
hsa_miR_3155b	4.81218	0	0	0	0	0	0	0	4.14558	0
hsa_miR_3158_3p	0	0	0	0	0	0	0	17.5289	0	6.35187
hsa_miR_3158_5p	0	0	0	0	0	0	0	56.1608	0	5.58508
hsa_miR_3162_3p	0	3.51209	0	8.76447	0	0	3.17593	5.25025	56.1608	0
hsa_miR_3168	8.76447	0	0	56.1608	0	3.80546	0	0	0	0
hsa_miR_3173_3p	0	4.66366	0	0	0	0	0	0	0	0
hsa_miR_3173_5p	0	17.5289	0	0	0	0	0	5.58508	0	0
hsa_miR_3176	9247.03	140.402	91.4314	15.8797	0	8.29115	0	3.80546	0	13.991
hsa_miR_3178	4401.84	2908.64	7368.36	430.051	157199	657.576	1206.36	2531.21	1156.86	1104.32
hsa_miR_3179	0	5284.02	0	0	0	0	0	0	0	0
hsa_miR_3180	0	0	0	19.2487	0	0	17.5289	4.14558	1.75604	0
hsa_miR_3181	19.2487	0	0	1.75604	0	0	0	0	4.14558	0
hsa_miR_3182	87.8022	852.424	4464.79	82.9115	0	76618.2	162.758	1340.96	121.255	755.872
hsa_miR_3184_3p	460.159	692.954	609.029	844.122	86.0461	1197.33	194188	36336.1	8799.53	1829.11
hsa_miR_3184_5p	4.66366	5.26813	7926.02	17.5289	0	5.58508	6.35187	147.007	0	60.8874
hsa_miR_3190_5p	0	0	0	28.0804	0	0	0	0	0	0
hsa_miR_3195	42148.7	3432.45	8260.33	540.776	788.803	567.837	331.075	1095.7	310436	228.286
hsa_miR_3196	1118.3	613.513	1019.86	30383.1	224.643	28.0967	67.3705	53.0582	76.2224	33.1646
hsa_miR_3199	0	0	0	0	0	0	0	3.80546	0	0
hsa_miR_32_3p	12.7037	0	0	0	0	0	0	38.4974	15.2219	17.5289
hsa_miR_32_5p	16.7552	10568	0	0	0	0	0	21.0725	0	112.322
hsa_miR_3200_3p	0	6.35187	0	0	0	0	0	0	0	5.25025
hsa_miR_3201	19.2487	47.4732	43.8224	24.5846	110.358	42.002	645.85	83.9458	37.3102	19815.1
hsa_miR_320a	3.51209	49.471	393.126	53.8925	9.62436	43593.1	31.5015	937.799	494.348	203.26
hsa_miR_320b	8.29115	57.7462	52.5025	65.2912	0	76.2224	6605.02	2443	841.389	170.345
hsa_miR_320c	9.32731	21.0725	14531	131.467	0	67.0209	15.8797	456.772	2751.88	235.939
hsa_miR_320d	17.5289	49.7469	31.7593	449.287	4.66366	98.9421	13.9627	114927	509.275	298.355
hsa_miR_320e	56.1608	55.9639	27.9254	78.7538	17.5289	153.99	22.8328	339.825	134742	108.875
hsa_miR_323a_3p	0	0	0	18494.1	0	14.0483	0	240.158	38.1112	74.6204
hsa_miR_323a_5p	0	0	0	0	0	0	0	7.61093	0	0
hsa_miR_323b_3p	0	10.5005	0	39.0956	0	9.32731	0	168.426	0	70.1158
hsa_miR_323b_5p	0	0	0	0	0	0	0	3.51209	0	0
hsa_miR_324_3p	22.8328	38.1112	74.6185	19.2487	0	0	105.174	182.405	21.0725	89.2543
hsa_miR_324_5p	0	27.9254	96.4092	38.633	0	78.7538	112.322	461.702	91.2027	89828.3
hsa_miR_326	7.02417	7.61093	112.322	49.7469	0	15852	21.001	2462.82	251.837	317.593
hsa_miR_328_3p	128.513	341.665	215.26	256.501	14.0483	174.676	54161.2	17606.4	1340.96	647.869
hsa_miR_329_3p	0	0	0	0	0	11.1702	0	236.261	112.322	22.8328
hsa_miR_329_5p	0	0	0	0	0	0	0	2642.01	0	0
hsa_miR_330_3p	0	18.6546	0	15.7508	0	9.62436	0	60.3427	15852	14.0483
hsa_miR_330_5p	0	0	7.61093	0	0	0	0	22.3403	0	12.4367
hsa_miR_331_3p	19815.1	2134.11	182.863	146.093	21.001	161.677	22.8286	1674.4	61.4359	531.657
hsa_miR_331_5p	0	0	0	0	0	0	0	9.62436	0	0
hsa_miR_335_3p	61.4359	62087.2	49.7469	49.471	0	184.054	41.9729	518.033	409.035	4577.11
hsa_miR_335_5p	26.6383	47.639	153.901	9.62436	0	224.643	0	273.608	15.8044	141.757
hsa_miR_337_3p	0	5.58508	0	0	0	10.5005	0	1091.3	8.29115	44914.1
hsa_miR_337_5p	0	0	0	0	0	2642.01	0	184.054	0	22.2315
hsa_miR_338_3p	0	0	0	0	0	0	0	280.804	0	11.1702
hsa_miR_339_3p	9.32731	0	2642.01	0	0	5.58508	0	42.002	56.1608	15.2219
hsa_miR_339_5p	0	0	0	56.1608	0	0	0	21136.1	0	4.81218
hsa_miR_33a_3p	56.1608	0	0	0	0	0	0	19.0556	0	0
hsa_miR_33a_5p	0	0	0	2642.01	0	7.02417	0	231.781	25.4075	82.9115
hsa_miR_33b_5p	0	0	0	6.35187	0	16.5823	0	266.383	19.5478	79.2822
hsa_miR_340_3p	12.7037	36.7518	3.51209	33.5105	2642.01	69.9549	8.29115	1024.99	45.6656	972.856
hsa_miR_340_5p	0	0	0	0	0	0	0	0	0	112.322
hsa_miR_342_3p	133.191	450.983	601.612	327.228	11.1702	1375.94	446.988	1426.08	107.119	614.28
hsa_miR_342_5p	0	0	0	5.26813	0	0	112.322	55.9639	24.8735	7926.02
hsa_miR_345_3p	0	7.61093	0	0	0	0	0	0	0	0
hsa_miR_345_5p	33.1646	24.0609	68.2533	0	0	0	0	505.448	87.6447	30.7179
hsa_miR_34a_3p	0	7.02417	3963.01	0	0	0	0	0	0	0
hsa_miR_34a_5p	35.0579	99.4938	44.4631	56.1608	0	0	0	5284.02	52.5025	9.62436
hsa_miR_3529_3p	0	18.6546	5.58508	0	0	9.62436	7.61093	41.2871	3963.01	3.51209
hsa_miR_3591_3p	10.5005	0	0	14531	28.0804	17.5604	0	466.354	1441.87	965.919
hsa_miR_3591_5p	0	0	0	6.35187	0	0	0	15.2219	22.3403	0
hsa_miR_3605_3p	6.35187	26.2513	3.51209	0	0	0	8.29115	0	7.61093	0
hsa_miR_3607_3p	0	2642.01	0	7.61093	0	0	0	70.2417	0	168.483
hsa_miR_3607_5p	0	6.35187	0	9.62436	0	0	0	174.114	0	31.5015
hsa_miR_361_3p	0	19.5478	105.174	7.02417	0	15.7508	224.643	125.919	53.8925	2642.01
hsa_miR_361_5p	7.02417	49.471	421.206	0	0	2642.01	0	192.818	9.32731	63.5187
hsa_miR_3610	4.14558	0	0	0	0	0	0	0	0	0
hsa_miR_3613_3p	0	0	2642.01	0	0	0	0	31.5015	0	0
hsa_miR_3613_5p	17.5289	4.14558	9.5278	84.2413	9.32731	11.4164	11.1702	15852	21.001	4.81218
hsa_miR_3614_5p	0	0	5.58508	0	0	0	0	0	0	0
hsa_miR_3615	0	17.5289	15.2219	0	0	0	0	39.0956	12.7037	41.4558
hsa_miR_3617_5p	1321	0	0	0	0	0	0	7.61093	0	0
hsa_miR_3619_3p	0	0	0	0	0	0	0	9.62436	0	0
hsa_miR_362_3p	0	5284.02	29.019	0	0	0	0	3.51209	0	0
hsa_miR_362_5p	0	6.35187	32.6456	0	0	0	0	8.29115	3.51209	0
hsa_miR_3620_3p	4.81218	2.79254	0	0	0	0	0	9.32731	0	5284.02
hsa_miR_3620_5p	3.51209	7.61093	0	0	0	0	0	0	4.66366	0
hsa_miR_3621	0	0	5.25025	0	0	0	0	0	0	0
hsa_miR_3622b_5p	0	0	0	0	0	0	6.35187	0	0	0
hsa_miR_363_3p	0	8.29115	44.4631	0	0	0	5.58508	33025.1	57.7528	9.62436
hsa_miR_363_5p	0	0	11.1702	0	0	0	0	0	0	0
hsa_miR_3648	10.5005	0	0	0	0	0	0	0	0	0
hsa_miR_3649	1321	0	0	0	0	0	0	0	0	0
hsa_miR_3651	0	0	1.75604	0	0	0	0	19.2487	0	8.76447
hsa_miR_3652	2.79254	1321	0	3.80546	3.17593	0	0	0	0	0
hsa_miR_3653_3p	22.8328	0	0	43.3096	0	0	0	82.9115	0	5.25025
hsa_miR_3653_5p	9.62436	0	0	0	0	0	0	51.3002	0	0
hsa_miR_3654	0	0	0	0	9.62436	1321	0	0	0	0
hsa_miR_3656	1276.84	745.888	3034.65	1156.59	98.3384	879.734	232497	5559.92	1051.74	335.105
hsa_miR_365a_3p	4.66366	10.5363	2642.01	0	0	0	0	10.5005	0	0
hsa_miR_365b_3p	8.76447	24.8735	6.35187	0	0	0	0	2642.01	0	0
hsa_miR_3665	112.322	0	13.9627	10.5005	0	0	11.4164	3.17593	0	1.75604
hsa_miR_3667_5p	0	0	0	0	0	0	0	0	0	8.29115
hsa_miR_3679_3p	0	0	0	0	0	0	0	7.61093	0	9.32731
hsa_miR_3679_5p	0	0	0	0	0	0	0	9.62436	0	0
hsa_miR_3688_3p	2.79254	0	8.29115	0	0	17.5289	9.32731	0	0	0
hsa_miR_3688_5p	0	0	0	0	0	0	8.76447	0	0	0
hsa_miR_369_3p	0	0	0	7.02417	0	10.5005	0	391.747	12.4367	11889
hsa_miR_369_5p	0	0	0	8.29115	0	0	0	219.112	9.32731	12.7037
hsa_miR_3690	0	0	0	0	0	0	0	56.1608	0	0
hsa_miR_370_3p	0	0	0	17.5289	0	5.58508	0	231.011	336.965	15.2219
hsa_miR_370_5p	0	0	0	0	0	0	0	0	10.5005	0
hsa_miR_374a_3p	112.322	23.3183	11.1702	0	0	0	0	79.3984	0	14.0483
hsa_miR_374a_5p	84.0041	368.108	129.386	5284.02	0	3.51209	0	636.699	12.7037	468.45
hsa_miR_374b_3p	1321	0	0	0	0	0	0	15.2219	0	18.6546
hsa_miR_374b_5p	222.315	472.523	110.631	25.1329	0	65.2912	0	3575.45	76.1093	3610.96
hsa_miR_374c_3p	195.478	118890	261.171	34.2492	0	122.703	0	1304.74	96.2436	11569.1
hsa_miR_374c_5p	60.8874	111.158	121.255	19.2487	0	56.1608	0	779.368	7.02417	530.276
hsa_miR_375	9.62436	5.58508	175.289	0	0	0	0	0	0	0
hsa_miR_376a_2_5p	0	0	0	0	0	0	5.25025	26.2934	0	0
hsa_miR_376a_3p	0	0	0	18.6546	0	0	0	2049.87	61.3513	22.3403
hsa_miR_376a_5p	0	0	0	0	0	0	0	21.001	56.1608	0
hsa_miR_376b_3p	0	0	0	0	0	0	0	14531	10.5005	9.62436
hsa_miR_376b_5p	0	0	0	0	0	0	0	19.0556	0	0
hsa_miR_376c_3p	0	0	0	5284.02	0	0	0	175.93	15.8797	41.4558
hsa_miR_376c_5p	0	0	0	0	0	0	0	22.8328	0	0
hsa_miR_377_3p	0	0	0	0	0	0	0	19.2487	0	0
hsa_miR_377_5p	0	0	0	0	0	0	0	7.02417	9.62436	0
hsa_miR_378a_3p	76.1093	254.075	97.9368	4.81218	0	56.1608	17.5289	70.4748	17.5604	5.25025
hsa_miR_378a_5p	9.62436	36.303	0	0	0	0	0	9.32731	4.14558	0
hsa_miR_378b	29.8527	304.437	617.769	4.14558	0	2642.01	10.5005	148.996	46.6366	3.17593
hsa_miR_378d	70.4748	384.974	115.506	9.32731	0	6.35187	2642.01	477.367	87.6447	2.79254
hsa_miR_378e	107.264	166.824	27741.1	26.2934	0	5.58508	6.35187	99.7548	280.804	3.80546
hsa_miR_378f	148.996	331.646	66.6946	28.0804	0	7.61093	5.58508	22457.1	52.5025	4.81218
hsa_miR_378g	477.367	373.093	58.6433	10.5005	0	9.62436	7.61093	53.9909	13210	1.75604
hsa_miR_378h	78.7538	490.81	49.471	0	0	3.51209	9.62436	25.1329	19.0556	4.14558
hsa_miR_378i	22457.1	2190.27	101.056	3.17593	0	8.29115	5.26813	68.4984	27.9254	4.66366
hsa_miR_378j	50.8149	367.518	29.8527	0	0	9.32731	8.29115	62.5583	22.8328	8.76447
hsa_miR_379_3p	0	0	0	22.8328	6.35187	17.5289	0	98.3384	24.0609	224.643
hsa_miR_379_5p	0	0	0	0	0	56.1608	0	190.696	22.8286	42.002
hsa_miR_380_3p	0	0	0	0	0	0	0	37.3093	0	0
hsa_miR_381_3p	0	0	0	0	0	0	0	236.641	9.32731	19.0556
hsa_miR_381_5p	0	0	0	0	0	0	0	196.563	52.5868	0
hsa_miR_382_3p	0	0	0	0	0	0	0	194.259	0	30.4437
hsa_miR_382_5p	0	0	0	252.724	9.32731	76.1093	5.58508	420079	577.528	197.299
hsa_miR_383_3p	0	0	0	10.5005	0	0	0	0	0	0
hsa_miR_3907	0	0	7.61093	0	28.0804	0	0	5.58508	0	0
hsa_miR_3909	2642.01	0	0	0	0	0	0	0	0	0
hsa_miR_3910	3.17593	5.25025	5.26813	0	0	4.66366	0	0	0	0
hsa_miR_3912_5p	0	0	0	0	0	0	0	3.51209	0	0
hsa_miR_3913_3p	0	0	9.32731	0	0	0	0	8.29115	0	0
hsa_miR_3913_5p	0	0	17.5289	0	0	0	0	9.32731	0	0
hsa_miR_3920	0	0	0	0	0	0	0	17.5289	0	0
hsa_miR_3928_3p	0	0	0	0	0	0	0	0	52.5868	0
hsa_miR_3940_3p	0	3.51209	0	0	0	0	0	31.5015	0	0
hsa_miR_3942_3p	0	0	0	0	9.32731	0	0	0	0	0
hsa_miR_3960	137173	7466.51	39444.6	6190.05	2331.35	2935.43	1997.87	3738.07	1.00528e+06	865.729
hsa_miR_409_3p	0	8.76447	0	114927	56.1608	73.7538	33.6853	1820.74	292.186	485.032
hsa_miR_409_5p	0	0	0	6.35187	0	0	3.51209	136.997	5.58508	65.2912
hsa_miR_410_3p	0	0	0	5.58508	0	0	0	62.5583	7.61093	0
hsa_miR_410_5p	0	0	0	0	0	0	0	3.51209	0	0
hsa_miR_411_3p	0	0	0	48.1218	5.58508	0	0	286.045	7.02417	21.001
hsa_miR_411_5p	0	0	0	3.51209	0	0	0	65.2912	8.29115	0
hsa_miR_421	0	15.2219	112.322	0	0	2642.01	10.5005	148.996	18.6546	38.1112
hsa_miR_422a	58.0381	178.051	26.2513	0	0	6.35187	2642.01	168.483	35.0579	2.79254
hsa_miR_423_3p	74.6185	54.4373	46235.1	210.347	8.29115	72.606	38.1112	1480.57	1123.22	338.686
hsa_miR_423_5p	972.856	596.963	368.408	5082.56	228.519	1434.66	410.503	1.70938e+06	5271.25	3151.98
hsa_miR_424_3p	449.287	233.183	92.1538	5.25025	0	19.2487	7.61093	31.7593	13210	7.02417
hsa_miR_424_5p	21.001	87.6447	205.495	0	0	3.51209	0	33.5105	0	16.5823
hsa_miR_425_3p	2642.01	112.322	14.4365	0	0	74.6204	3.51209	403.379	94.9463	275.156
hsa_miR_425_5p	12.7037	110.255	54.4373	72.606	3963.01	102.6	33.1646	1121.24	95.1366	964.092
hsa_miR_4251	11.1702	3963.01	0	7.61093	0	8.76447	18.6546	1.75604	0	0
hsa_miR_4255	7.61093	0	0	14.4365	5.58508	0	0	4.14558	3.51209	0
hsa_miR_4256	4.81218	0	8.76447	0	15.2219	0	84.2413	4.66366	4.14558	0
hsa_miR_4257	0	3.80546	0	0	0	0	0	0	9.32731	0
hsa_miR_4258	116.076	14.4365	47.2523	9.32731	12.2923	6.35187	2642.01	56.1608	26.2934	80.9836
hsa_miR_4260	0	0	0	0	0	0	0	0	28.0804	0
hsa_miR_4261	35.0579	20.7279	34.9353	84.2413	18.6546	11.4164	19.5478	3963.01	21.001	4.81218
hsa_miR_4262	28.0804	0	0	0	0	0	3.80546	0	0	0
hsa_miR_4263	5.25025	17.5289	3.80546	0	56.1608	3.51209	0	0	0	0
hsa_miR_4264	0	56.1608	4.81218	0	0	0	1.75604	11.4164	8.37762	0
hsa_miR_4266	0	5.25025	3.51209	2.79254	1321	0	8.29115	9.62436	22.8328	0
hsa_miR_4267	134.042	67371.2	219.716	11.4164	0	8.76447	4.66366	7.02417	4.81218	0
hsa_miR_4270	0	0	0	0	0	0	17.5289	0	0	0
hsa_miR_4271	33.6853	5.58508	35.0579	17.5604	38.0546	10.5005	196.563	23.3183	20.7279	3963.01
hsa_miR_4272	0	0	0	4.14558	0	0	0	0	0	0
hsa_miR_4273	0	0	15.7508	0	0	0	0	0	0	0
hsa_miR_4274	9.32731	0	1321	8.76447	4.14558	8.37762	0	10.5005	0	7.61093
hsa_miR_4275	26.2934	33.1646	3.17593	0	9.32731	3.80546	0	3963.01	5.25025	4.81218
hsa_miR_4276	28.0804	0	0	5.25025	0	76.9949	0	0	3963.01	0
hsa_miR_4278	5.25025	0	0	0	0	0	0	0	0	0
hsa_miR_4279	23778.1	645.85	125.117	181.028	451.522	219.716	161.556	140.802	148.005	172.555
hsa_miR_4281	396.992	131.256	440.767	69.8135	38309.1	149.237	203.133	91.4314	167.44	219.112
hsa_miR_4282	2.79254	0	0	0	0	0	0	0	4.81218	0
hsa_miR_4283	7.61093	3.17593	13.991	19.2487	5.58508	84.2413	35.0579	16.5823	3.51209	0
hsa_miR_4284	62.5583	41.8881	420.695	2409.29	643.124	11020.3	56048.5	9663.1	4825.45	2.214e+06
hsa_miR_4286	312.576	1624.93	15837.4	149.241	38.4974	36988.1	68.2533	3207.8	121.255	244.547
hsa_miR_4287	0	0	0	0	0	0	0	0	0	0
hsa_miR_4288	51.3002	43.9011	11889	236.641	932.755	240.158	127.037	4058.45	8873.41	1427.05
hsa_miR_4289	52.5868	58.0381	53.9909	870.493	9.32731	197.884	58.6433	803170	882.043	1371.47
hsa_miR_429	1516.34	480.357	418.881	0	0	0	0	0	0	0
hsa_miR_4290	21.001	8.76447	0	35667.1	224.643	26.3407	125.117	30.7179	50.8149	24.8735
hsa_miR_4291	64729.2	5054.48	1203.05	168.325	73.5035	1044.69	138.727	7470.13	1480.05	3460.43
hsa_miR_4292	0	0	5.26813	0	0	0	0	0	0	8.76447
hsa_miR_4293	0	5284.02	0	3.80546	0	8.76447	9.32731	0	0	0
hsa_miR_4295	0	0	0	9.62436	0	0	0	0	0	0
hsa_miR_4296	0	2.79254	0	0	3.80546	0	0	0	12.4367	0
hsa_miR_4297	12.2923	26.6383	252.724	37.3102	62.5583	15852	63.003	61.3513	37.3093	19.0556
hsa_miR_4298	0	0	0	0	0	0	0	28.0804	0	0
hsa_miR_4300	0	0	0	0	0	0	0	0	0	0
hsa_miR_4301	0	8.29115	3.17593	0	0	0	0	3963.01	0	19.2487
hsa_miR_4302	0	0	0	21.001	0	0	0	0	0	0
hsa_miR_4303	21.001	35.0579	0	13210	112.322	3.51209	14.4365	5.58508	3.17593	4.14558
hsa_miR_4304	1321	28.0804	4.81218	0	0	0	1.75604	15.2219	0	0
hsa_miR_4305	3.17593	0	1.75604	0	0	0	4.14558	0	0	8.76447
hsa_miR_4306	0	3963.01	45.6013	87.5257	0	744.98	93.2731	813.048	538.964	5588
hsa_miR_4307	0	6.35187	0	9.62436	0	56.1608	8.76447	0	3.51209	5.25025
hsa_miR_4308	4.81218	0	0	0	3.80546	0	28.0804	0	8.29115	0
hsa_miR_4309	3.51209	0	0	0	0	0	0	0	4.66366	0
hsa_miR_431_3p	0	0	0	0	0	0	0	168.483	0	0
hsa_miR_431_5p	0	0	0	0	0	5.58508	0	89.2543	56.1608	0
hsa_miR_4310	157.761	111.931	193.732	112.322	0	11.4164	2.79254	1321	0	4.81218
hsa_miR_4311	0	0	2.79254	5.25025	26.2934	0	11.4164	9.5278	1321	0
hsa_miR_4313	0	0	0	0	0	0	0	11.1702	6.35187	0
hsa_miR_4314	1321	28.0804	9.62436	0	0	0	1.75604	3.80546	0	0
hsa_miR_4316	3.17593	5.25025	0	0	0	4.66366	8.29115	4.81218	7.61093	26.2934
hsa_miR_4317	659.039	775429	1471.68	2914.99	101.63	7581.27	1590.31	18779.1	8397.26	152449
hsa_miR_4318	7.61093	15.8797	0	28.8731	0	589.689	0	397.975	59.7055	372.768
hsa_miR_4319	9.62436	2.79254	0	0	0	5.25025	84.2413	0	0	0
hsa_miR_432_5p	3.51209	0	0	74.6204	0	5284.02	47.2523	1288.38	415.065	136.565
hsa_miR_4320	0	0	0	0	0	0	0	0	8.76447	0
hsa_miR_4321	0	0	0	0	0	2.79254	0	0	0	0
hsa_miR_4323	8.76447	16.5823	0	168.483	4.66366	0	19.5478	89828.3	63.003	173.239
hsa_miR_4324	140.402	9.32731	2.79254	0	0	0	0	0	0	0
hsa_miR_4325	31.5015	0	34.2492	3963.01	112.322	15.8044	4.81218	217.818	101.63	178.26
hsa_miR_4326	0	112.322	0	0	15.7508	0	0	7.61093	0	4.66366
hsa_miR_4328	3.17593	5.25025	0	58.6433	2642.01	83.9458	16.5823	649.644	125.58	350.579
hsa_miR_433_3p	0	0	0	0	0	0	0	3.51209	0	0
hsa_miR_433_5p	0	0	0	0	0	0	0	8.29115	0	0
hsa_miR_4417	38.4974	13.9627	17.5289	1.75604	7.61093	0	56.1608	4.66366	0	1321
hsa_miR_4419a	3.51209	7.61093	56.1608	20.7279	9.62436	5284.02	21.001	52.5868	13.991	6.35187
hsa_miR_4419b	0	0	0	0	1.75604	0	1321	28.0804	0	5.58508
hsa_miR_4421	0	0	0	0	4.14558	0	0	0	0	0
hsa_miR_4426	17.5289	0	6.35187	0	46.6366	0	0	0	0	0
hsa_miR_4429	0	0	0	0	0	0	0	6.35187	0	0
hsa_miR_4430	5.25025	52.5868	3.80546	33025.1	842.413	3.51209	211.736	33.5105	88.9262	58.0381
hsa_miR_4433a_3p	0	0	0	3.17593	0	16.5823	10.5363	289.215	50.2657	279.819
hsa_miR_4433a_5p	0	0	0	16.7552	0	83.9458	16.5823	298.355	83.7202	350.579
hsa_miR_4433b_3p	0	0	0	22.8328	0	157.761	18.6546	110.631	110.68	1095.14
hsa_miR_4433b_5p	0	0	0	4.81218	0	112.322	52.5868	315.064	31.6088	315.015
hsa_miR_4434	19.2487	19.5478	17.5289	7.02417	11.4164	21.001	168.483	0	8.29115	1321
hsa_miR_4436b_3p	0	0	0	0	0	0	0	0	4.66366	0
hsa_miR_4436b_5p	0	0	0	0	0	0	0	0	8.76447	0
hsa_miR_4441	18.6546	1.75604	5284.02	35.0579	8.29115	8.37762	9.5278	36.7518	168.483	15.2219
hsa_miR_4442	17.5289	4.14558	3.17593	0	9.32731	11.4164	5.58508	2642.01	15.7508	9.62436
hsa_miR_4443	55880	13725.1	10634	299.264	289.228	206.924	144.608	346.177	46235.1	64.9736
hsa_miR_4444	36.7518	26.2934	7.61093	5284.02	112.322	5.26813	19.2487	2.79254	12.7037	4.14558
hsa_miR_4446_3p	0	56.1608	9.62436	22.2315	0	33.1646	21.0725	270.188	184.308	125.919
hsa_miR_4446_5p	0	0	0	0	0	0	0	19.2487	7.61093	0
hsa_miR_4447	25.1329	9247.03	41.4558	64.6929	28.5834	131.467	139.91	54.4373	91.4314	477.367
hsa_miR_4448	589.847	816.215	3483.75	404.223	78.1911	1375.94	254.17	2412.73	751.587	1375.57
hsa_miR_4449	24.0609	5.58508	17.5289	5.26813	0	5.25025	28.0804	18.6546	4.14558	3963.01
hsa_miR_4451	19.3165	45.6656	393.126	8.29115	24.0609	1321	5.25025	0	9.32731	0
hsa_miR_4452	0	0	0	4.66366	0	0	0	0	0	0
hsa_miR_4454	5712.98	4741.32	1.12642e+07	385.637	228.007	55.8508	73.0465	388.519	982.815	60.8874
hsa_miR_4455	473.282	169.969	127.037	1404.02	135.246	258.772	220.611	118890	388.519	173.239
hsa_miR_4456	84.2413	0	8.37762	15.7508	8.76447	9.62436	26.6383	6.35187	2642.01	10.5363
hsa_miR_4458	5.25025	8.76447	15.2219	3963.01	84.2413	1.75604	9.62436	0	6.35187	4.14558
hsa_miR_4459	0	0	0	0	0	0	1.75604	0	0	0
hsa_miR_4461	0	5.25025	0	44.6806	0	172.555	136.804	139.553	102.748	140.232
hsa_miR_4463	30.7179	0	16.5823	68.4984	31.7593	201.583	60.6275	33.3648	125.117	168.483
hsa_miR_4466	121.775	50.8149	223.856	52.934	5.58508	112.322	70.1158	16.5823	10.5363	36.7518
hsa_miR_4468	4.81218	0	0	3.51209	15.2219	0	56.1608	4.66366	4.14558	3963.01
hsa_miR_4472	35.1209	41.8601	505.448	74.6204	86.6193	39630.1	194.259	464.517	116.591	60.3427
hsa_miR_4473	0	0	0	0	0	0	0	56.1608	0	0
hsa_miR_4478	0	5.26813	2642.01	17.5289	16.5823	5.58508	3.17593	0	196.563	7.61093
hsa_miR_4481	61.3513	20.7279	9.5278	196.563	27.9819	26.6383	19.5478	6605.02	15.7508	0
hsa_miR_4483	308.885	37.3093	39.0956	73.5035	78.8803	149.178	110.358	76.2224	27741.1	12.2923
hsa_miR_4484	47.2523	52.5868	19.0273	585205	926.654	2079.16	5712.06	4035.22	1136.98	6786.31
hsa_miR_4485_3p	2642.01	0	52.934	1190.98	425.271	2325.67	1668.24	2568.69	1521.93	1221.88
hsa_miR_4485_5p	50.8149	57.7528	45.6571	3152.78	256275	11234.7	11777.6	10408.7	6294.24	10955.6
hsa_miR_4486	2.79254	0	0	3.80546	3.17593	0	9.32731	1.75604	4.81218	0
hsa_miR_4487	0	0	0	0	0	0	0	8.29115	0	0
hsa_miR_4488	7863.1	2683.63	53445.8	389.842	403.379	1632.83	7946.76	970.041	526.488	114927
hsa_miR_4492	1389.03	251.161	24823.1	236.298	139.553	25099.1	141.757	184.054	205.201	47.639
hsa_miR_4497	2777.54	2858.44	8647.17	2546.36	149.264	752.696	280053	12271.1	2787.1	365.823
hsa_miR_4499	32.6456	10.5363	6605.02	61.3513	33.1646	13.9627	28.5834	26.2513	140.402	19.0273
hsa_miR_449b_3p	0	8.29115	0	0	0	0	0	0	0	0
hsa_miR_4500	2695.72	1399.1	1597.33	882.043	148.996	5606.19	1080.75	29968.1	3.893e+06	6618.53
hsa_miR_4505	15.7508	8.76447	0	0	28.0804	0	0	0	0	4.14558
hsa_miR_4506	0	56.1608	0	3.17593	0	0	0	0	0	0
hsa_miR_4507	6.35187	15.7508	0	0	0	0	4.14558	4.81218	3.80546	8.76447
hsa_miR_4508	2583.1	182299	4377.73	430.018	139.741	587.22	181.883	105.363	375.35	1263.62
hsa_miR_450a_1_3p	0	0	0	0	0	0	0	0	0	10.5005
hsa_miR_450a_2_3p	0	0	17.5289	0	0	0	0	0	0	0
hsa_miR_450a_5p	0	7.61093	0	0	0	0	0	35.0579	0	0
hsa_miR_450b_5p	8.29115	9.62436	5.25025	0	0	0	0	0	0	0
hsa_miR_4510	419.729	505.741	311757	17.5289	8.29115	33.5105	15.8797	299.264	1038.98	87.5257
hsa_miR_4512	0	0	0	56.1608	4.66366	7.61093	8.37762	0	0	0
hsa_miR_4514	0	0	2.79254	0	0	9.62436	0	0	0	0
hsa_miR_4516	4740.98	3961.54	7496.77	217966	1123.22	151.02	370.538	215.026	317.593	252.88
hsa_miR_4519	1321	0	4.81218	6.35187	0	0	0	0	0	0
hsa_miR_451a	0	0	0	5.58508	2642.01	18.6546	16.5823	423.472	79.9148	245.405
hsa_miR_451b	0	0	0	0	0	0	0	0	0	224.643
hsa_miR_452_5p	0	0	0	0	0	0	0	12.4367	3.51209	21.001
hsa_miR_4520_2_3p	4.81218	0	0	0	0	0	0	0	0	0
hsa_miR_4520_5p	1.75604	0	0	0	0	0	0	0	0	0
hsa_miR_4521	0	4.81218	0	0	0	0	0	0	0	0
hsa_miR_4526	0	0	0	0	0	5.58508	0	0	0	0
hsa_miR_4530	78.8803	4.14558	15.8797	140.402	9.32731	30.4437	8.37762	6605.02	5.25025	9.62436
hsa_miR_4531	6318.1	2182.59	2479.78	246.762	96.4092	120.305	57.082	854.326	96433.3	200.189
hsa_miR_4532	4882.74	3470.73	7139.05	2.55746e+06	40267.3	2123.06	5278.96	1561.03	3160.05	916.172
hsa_miR_4534	10568	336.965	28.8731	34.9353	42.002	37.3102	17.5604	30.4437	36.303	51.3002
hsa_miR_4535	0	5.25025	1.75604	0	2642.01	0	0	0	0	0
hsa_miR_454_3p	0	23778.1	58.0381	7.61093	0	96.4092	0	372.281	115.492	2527.24
hsa_miR_454_5p	0	6.35187	0	0	0	0	0	41.4558	0	52.5025
hsa_miR_455_3p	38.4974	136.834	192.818	0	0	0	0	0	0	0
hsa_miR_4634	2872.89	2930.21	98000.7	464.305	283.919	105680	309.765	1849.3	713.54	254.075
hsa_miR_4640_3p	12.4367	19.2487	0	0	0	0	0	0	0	0
hsa_miR_4645_3p	0	0	0	0	0	0	6.35187	0	0	0
hsa_miR_4645_5p	0	0	0	0	0	0	5.58508	0	0	0
hsa_miR_4646_3p	0	0	0	0	0	0	0	12.7037	0	3.51209
hsa_miR_4646_5p	0	0	0	0	0	0	0	0	6.35187	0
hsa_miR_4651	0	0	4.81218	3.17593	0	0	0	0	2.79254	0
hsa_miR_4655_3p	3.17593	10.5005	1.75604	8.37762	1321	0	16.5823	9.62436	7.61093	8.76447
hsa_miR_4655_5p	0	0	0	0	0	8.76447	0	0	0	0
hsa_miR_466	0	9.5278	0	4.81218	0	56.1608	0	0	0	0
hsa_miR_4662a_5p	0	5.58508	0	0	0	0	56.1608	18.6546	0	2642.01
hsa_miR_4662b	0	7.61093	0	0	0	0	10.5005	35.0579	0	6.35187
hsa_miR_4664_3p	8.29115	4.81218	0	0	3.51209	0	0	0	0	0
hsa_miR_4665_5p	0	0	0	0	0	0	0	0	0	7.61093
hsa_miR_4667_3p	0	0	0	28.0804	0	0	0	0	0	9.62436
hsa_miR_4668_3p	0	0	0	0	0	4.81218	0	0	0	0
hsa_miR_4669	0	0	0	0	0	0	0	0	3.17593	0
hsa_miR_4676_3p	0	0	0	0	0	0	0	11.4164	0	0
hsa_miR_4676_5p	0	0	0	0	0	0	0	24.0609	7.61093	17.5289
hsa_miR_4685_3p	0	0	0	0	0	0	0	7.02417	0	0
hsa_miR_4687_5p	0	0	0	0	2.79254	0	0	0	0	10.5005
hsa_miR_4695_5p	0	0	0	0	0	0	56.1608	0	0	0
hsa_miR_4701_3p	0	0	0	4.14558	0	0	5.25025	26.2934	9.32731	0
hsa_miR_4709_5p	0	0	0	0	0	0	2642.01	0	0	0
hsa_miR_4710	9.32731	3.51209	5284.02	17.5289	20.7279	5.58508	6.35187	26.2513	168.483	7.61093
hsa_miR_4711_3p	0	0	0	56.1608	0	0	5.58508	0	0	0
hsa_miR_4716_3p	0	4.66366	0	0	0	0	0	0	0	0
hsa_miR_4723_3p	0	17.5289	0	2642.01	0	0	0	0	0	0
hsa_miR_4728_3p	5284.02	533.528	38.4974	0	0	0	0	0	0	0
hsa_miR_4728_5p	0	10.5005	0	0	0	0	0	0	0	0
hsa_miR_4731_5p	0	1321	0	0	0	0	0	0	0	0
hsa_miR_4732_5p	0	0	0	0	0	0	0	8.29115	0	0
hsa_miR_4738_3p	0	0	0	0	0	0	0	0	8.29115	0
hsa_miR_4742_5p	3.51209	0	0	0	0	2642.01	0	0	0	0
hsa_miR_4743_3p	0	0	0	0	0	0	0	0	0	0
hsa_miR_4743_5p	0	0	0	0	0	0	0	0	112.322	0
hsa_miR_4745_3p	0	8.29115	0	0	0	0	0	0	0	0
hsa_miR_4745_5p	0	4.66366	0	0	0	0	0	0	0	0
hsa_miR_4748	0	0	0	0	0	0	0	5.58508	0	0
hsa_miR_4749_3p	0	112.322	9.62436	0	0	0	1.75604	7.61093	0	18.6546
hsa_miR_4750_5p	0	0	0	0	0	0	0	9.62436	0	0
hsa_miR_4758_3p	0	0	8.29115	0	0	0	0	0	0	0
hsa_miR_4758_5p	0	0	4.66366	0	0	0	0	0	0	0
hsa_miR_4770	0	0	0	3.51209	0	0	0	0	0	0
hsa_miR_4775	0	0	0	8.29115	0	3963.01	5.25025	8.76447	0	3.17593
hsa_miR_4785	24.8735	28.8731	5.25025	0	0	15.8797	0	0	0	0
hsa_miR_4787_3p	0	7.02417	0	0	0	0	0	0	0	0
hsa_miR_4787_5p	0	0	0	0	0	0	0	0	5.25025	0
hsa_miR_4788	0	9.32731	0	0	0	0	0	0	0	0
hsa_miR_4791	10.5005	8.76447	3.80546	0	56.1608	0	0	13.9627	6.35187	0
hsa_miR_4792	443857	3285.41	2425.34	263.603	199.51	153.386	63.2176	388.157	97.7389	111.928
hsa_miR_4795_3p	0	0	0	0	0	0	0	9.62436	0	0
hsa_miR_4795_5p	0	0	0	0	0	0	0	3.51209	0	0
hsa_miR_4800_3p	3.80546	3.17593	0	0	0	0	0	0	3.51209	0
hsa_miR_4800_5p	0	5.58508	0	0	0	0	0	0	0	0
hsa_miR_483_3p	0	0	0	16.5823	19.2487	5284.02	0	52.5868	27.9819	22.2315
hsa_miR_483_5p	0	0	0	9.32731	3.51209	0	0	0	70.1158	0
hsa_miR_484	9.32731	40.389	19815.1	113.938	8.29115	58.6433	25.4075	1727.33	1740.99	658.345
hsa_miR_485_3p	0	0	0	224.643	0	38.0546	0	165125	136.507	76.9949
hsa_miR_485_5p	0	0	0	0	0	0	0	15.8797	2642.01	3.51209
hsa_miR_486_3p	0	0	0	180978	645.85	170.336	274.294	2072.06	2118.35	3030.42
hsa_miR_486_5p	0	0	0	428.751	110.255	389.684	94.8263	2823.65	1837.49	3381.15
hsa_miR_487a_3p	0	0	0	0	0	0	0	57.7462	7.61093	0
hsa_miR_487a_5p	0	0	0	15.2219	0	17.5289	0	35.1209	19.2487	0
hsa_miR_487b_3p	0	0	0	28.8731	0	0	0	949.337	40.389	63.003
hsa_miR_487b_5p	0	0	0	0	0	0	0	9.32731	0	0
hsa_miR_489_3p	3.51209	45.6656	280.804	0	0	0	0	0	0	0
hsa_miR_489_5p	0	0	10.5005	0	0	0	0	0	0	0
hsa_miR_490_3p	0	0	0	0	0	0	0	21.001	0	0
hsa_miR_491_5p	0	0	6.35187	0	0	7.61093	0	7926.02	15.7508	9.62436
hsa_miR_492	0	4.66366	0	0	0	0	0	0	0	0
hsa_miR_493_3p	0	0	0	0	0	0	0	22.3403	6.35187	0
hsa_miR_493_5p	0	0	0	6.35187	0	16.5823	0	156.024	5.58508	41.9729
hsa_miR_494_3p	0	10.5005	0	11.1702	0	0	0	250.233	30.4437	17.5289
hsa_miR_495_3p	0	2642.01	0	22.8328	0	35.0579	0	203.701	38.4974	224.643
hsa_miR_495_5p	0	0	0	0	0	56.1608	0	29.019	3.51209	5.25025
hsa_miR_496	0	0	0	7.02417	0	0	0	32.6456	24.8735	0
hsa_miR_497_5p	0	0	56.1608	0	0	0	0	35.0579	9.32731	9.5278
hsa_miR_5002_3p	0	0	0	0	0	0	0	0	17.5289	0
hsa_miR_5006_3p	0	0	0	8.76447	0	2.79254	0	5.25025	0	0
hsa_miR_5006_5p	0	0	0	0	0	0	0	0	0	4.81218
hsa_miR_500a_3p	112.322	79.2822	11.1702	0	0	0	0	12.7037	0	0
hsa_miR_500b_3p	10.5005	35.0579	0	0	0	0	0	5.58508	0	0
hsa_miR_500b_5p	3963.01	112.322	24.0609	3.17593	0	0	0	3.80546	0	0
hsa_miR_501_3p	12.7037	73.5035	3.51209	0	0	0	0	19.2487	0	0
hsa_miR_501_5p	5.58508	0	8.29115	0	0	0	0	0	0	56.1608
hsa_miR_5010_3p	3.80546	0	9.32731	0	0	0	0	0	0	0
hsa_miR_5010_5p	0	0	0	0	0	10.5005	56.1608	0	8.29115	5284.02
hsa_miR_502_3p	7.02417	64.6929	112.322	0	0	0	0	52.5868	0	0
hsa_miR_502_5p	0	0	21.001	0	0	0	0	28.0804	0	0
hsa_miR_503_5p	0	0	0	0	0	0	0	10.5005	0	0
hsa_miR_504_3p	17.5289	0	0	0	0	0	0	0	5.25025	0
hsa_miR_504_5p	0	0	5.58508	0	0	0	0	0	0	0
hsa_miR_505_3p	10.5005	192.818	38.0546	2642.01	0	10.5363	0	231.781	69.8705	203.133
hsa_miR_505_5p	7926.02	336.965	28.8731	12.7037	10.5005	45.6013	15.8044	156.024	86.5687	79.2822
hsa_miR_508_3p	0	10.5005	0	0	0	0	0	9.62436	0	0
hsa_miR_5094	0	0	0	0	0	0	0	1.75604	0	0
hsa_miR_5095	616.485	498.622	172.555	153.99	80.9836	84.2413	482.046	116.076	66.7297	89.2543
hsa_miR_5096	250.233	164.76	140.232	762.123	1598.3	299.264	15360	275.156	1061.27	100396
hsa_miR_5100	245.846	890.479	20639.1	0	0	2642.01	0	0	0	6.35187
hsa_miR_513b_5p	8.29115	0	0	0	0	0	0	0	0	0
hsa_miR_513c_5p	13.991	0	0	0	0	0	0	0	0	0
hsa_miR_516a_3p	0	4.14558	3.17593	0	0	0	0	0	0	9.62436
hsa_miR_516b_3p	0	4.66366	2.79254	0	0	0	0	0	0	3.51209
hsa_miR_517c_3p	0	0	0	0	0	1.75604	0	0	0	0
hsa_miR_5187_5p	0	56.1608	0	0	0	24.8735	0	3.80546	5.58508	0
hsa_miR_5189_5p	0	0	0	5.58508	0	0	0	0	7.61093	0
hsa_miR_518d_5p	0	0	0	0	0	0	0	0	0	56.1608
hsa_miR_518e_3p	0	0	9.32731	9.62436	0	0	0	0	0	0
hsa_miR_518e_5p	0	0	17.5289	3.51209	0	0	0	0	0	2642.01
hsa_miR_518f_3p	0	0	0	8.29115	0	0	0	0	0	0
hsa_miR_518f_5p	0	0	0	0	0	0	0	0	0	5.58508
hsa_miR_5193	0	0	0	0	0	0	0	63.003	0	30.4437
hsa_miR_5196_3p	8.76447	0	0	0	0	0	0	0	0	0
hsa_miR_519a_5p	0	0	5.58508	10.5005	0	0	0	0	0	3.51209
hsa_miR_519b_5p	0	0	7.61093	2642.01	0	0	0	0	0	8.29115
hsa_miR_519c_5p	0	0	9.62436	6.35187	0	0	0	0	0	9.32731
hsa_miR_520b	0	0	0	5.58508	0	0	0	0	0	17.5289
hsa_miR_520c_3p	0	0	0	0	0	0	0	0	0	56.1608
hsa_miR_520c_5p	0	0	0	0	0	0	0	0	0	10.5005
hsa_miR_520d_5p	0	2.79254	0	0	0	0	0	0	0	0
hsa_miR_520e	0	0	0	0	0	0	0	0	0	6.35187
hsa_miR_520f_3p	0	0	0	0	0	0	0	0	0	5.58508
hsa_miR_520f_5p	0	0	0	17.5289	0	0	0	0	0	7.61093
hsa_miR_520g_5p	0	0	3.17593	0	0	0	0	0	0	0
hsa_miR_522_5p	0	0	5.58508	10.5005	0	0	0	0	0	3.51209
hsa_miR_523_5p	0	0	7.61093	2642.01	0	0	0	0	0	8.29115
hsa_miR_524_5p	0	0	0	0	0	0	1.75604	0	0	0
hsa_miR_525_3p	0	0	0	5.58508	0	0	0	0	0	0
hsa_miR_526a	0	0	0	0	0	0	0	0	0	56.1608
hsa_miR_526b_3p	0	0	0	0	0	0	0	0	0	10.5005
hsa_miR_532_3p	158.802	231.781	701.158	0	15.2219	5.25025	0	74.6185	24.8735	14531
hsa_miR_532_5p	31.6088	83.7202	1544.42	8.29115	0	7926.02	21.001	333.05	18.6546	19.0556
hsa_miR_539_3p	0	0	0	0	0	0	0	56.1608	8.76447	0
hsa_miR_539_5p	0	0	0	0	8.29115	5.58508	0	357.017	336.965	60.8874
hsa_miR_542_3p	17.5289	8.29115	12.7037	0	0	0	0	0	0	0
hsa_miR_542_5p	0	0	5.58508	0	0	0	0	6.35187	0	0
hsa_miR_543	0	0	0	0	0	7.02417	0	187.1	12.7037	53.8925
hsa_miR_544a	0	0	0	0	0	0	0	7.61093	0	0
hsa_miR_545_5p	0	0	0	0	1321	0	0	0	0	0
hsa_miR_548a_3p	0	0	0	0	0	0	0	7.02417	0	0
hsa_miR_548a_5p	0	0	0	0	0	0	0	8.29115	0	0
hsa_miR_548aa	0	0	0	0	0	0	0	13.991	8.29115	3963.01
hsa_miR_548ab	0	0	0	0	0	0	0	0	4.66366	0
hsa_miR_548ac	0	0	0	0	0	0	0	56.1608	0	0
hsa_miR_548ad_5p	0	1.75604	2642.01	0	0	5.58508	0	215.26	308.885	41.8601
hsa_miR_548ae_5p	0	4.14558	6.35187	0	0	7.61093	0	54161.2	57.7528	52.934
hsa_miR_548ah_3p	0	0	0	0	0	0	0	0	0	1.75604
hsa_miR_548aj_5p	0	0	0	0	0	0	0	11.1702	0	8.29115
hsa_miR_548ak	0	0	0	0	0	0	0	7.61093	0	4.66366
hsa_miR_548am_5p	0	0	0	0	0	9.32731	0	120.305	3.80546	78.8803
hsa_miR_548an	0	3963.01	0	0	0	0	0	0	4.81218	0
hsa_miR_548ap_3p	19.0273	6.35187	18.6546	0	33.5105	112.322	8.76447	178.26	19.3165	73.5035
hsa_miR_548ap_5p	0	0	0	0	34.2492	15.7508	0	177.219	0	14531
hsa_miR_548aq_3p	0	0	0	0	0	0	0	52.5868	0	9.5278
hsa_miR_548aq_5p	0	0	0	0	0	0	0	0	0	5.58508
hsa_miR_548ar_5p	0	0	0	0	0	5.58508	0	110.255	0	26.6383
hsa_miR_548as_5p	0	0	0	0	0	7.61093	0	9247.03	0	24.0609
hsa_miR_548at_3p	0	0	0	0	8.76447	0	0	0	0	0
hsa_miR_548au_5p	0	0	0	0	0	3.51209	0	103.324	6.35187	37.3102
hsa_miR_548av_3p	0	0	0	0	0	0	0	0	0	4.66366
hsa_miR_548av_5p	0	5.25025	0	0	2642.01	0	4.14558	19.2487	0	35.0579
hsa_miR_548ax	0	0	0	0	0	0	0	0	0	112.322
hsa_miR_548ay_5p	0	3.17593	9.32731	0	0	56.1608	0	99.4938	19.3165	47.2523
hsa_miR_548az_3p	0	0	0	0	0	0	28.0804	0	0	1321
hsa_miR_548az_5p	0	0	0	0	0	0	0	17.5289	9.32731	9.5278
hsa_miR_548b_5p	0	0	0	0	0	0	0	28.0804	8.76447	0
hsa_miR_548bb_3p	0	0	0	0	0	0	0	10.5005	84.2413	0
hsa_miR_548bb_5p	0	0	0	0	0	7.61093	0	6605.02	10.5005	0
hsa_miR_548c_3p	0	0	0	0	0	0	0	6.35187	0	1.75604
hsa_miR_548c_5p	0	0	0	0	0	3.51209	0	69.8135	3.17593	37.3102
hsa_miR_548d_3p	0	0	0	0	0	0	0	7.61093	13.9627	0
hsa_miR_548d_5p	0	5.25025	3.51209	0	0	9.32731	0	52.934	26.6383	61.3513
hsa_miR_548e_3p	0	0	0	0	0	0	0	3.51209	0	0
hsa_miR_548e_5p	0	0	0	0	0	0	0	0	0	5.25025
hsa_miR_548f_3p	4.81218	2.79254	8.76447	0	22.8328	15.7508	56.1608	139.91	0	9247.03
hsa_miR_548f_5p	0	0	0	0	0	0	0	35.0579	0	0
hsa_miR_548g_3p	0	0	0	0	0	6.35187	0	645.85	0	11.1702
hsa_miR_548g_5p	0	0	0	0	0	0	0	21.001	0	7.61093
hsa_miR_548h_3p	0	0	3.17593	0	0	7.61093	0	43593.1	5.25025	43.3096
hsa_miR_548i	0	0	0	0	0	9.62436	0	25.4075	0	8.78022
hsa_miR_548j_5p	0	0	0	0	0	0	0	5.58508	0	0
hsa_miR_548l	0	0	0	0	0	0	0	7.61093	0	0
hsa_miR_548n	0	0	3.51209	0	0	0	0	0	3.80546	0
hsa_miR_548o_5p	0	0	0	0	0	17.5289	0	43.9011	4.81218	252.724
hsa_miR_548q	7.61093	6.35187	0	0	0	0	0	16.5823	0	10.5005
hsa_miR_548t_3p	0	0	0	0	0	0	0	13.991	8.29115	3963.01
hsa_miR_548u	0	0	0	0	0	0	0	17.5289	0	0
hsa_miR_548v	0	0	0	0	0	0	0	0	17.5289	0
hsa_miR_548w	0	0	0	0	0	0	0	5.25025	0	0
hsa_miR_548x_3p	0	0	0	28.0804	0	0	0	0	0	0
hsa_miR_548x_5p	0	0	0	0	0	0	0	12.7037	0	3.51209
hsa_miR_548y	0	0	0	0	0	3.51209	0	13.9627	0	0
hsa_miR_548z	0	0	4.81218	0	0	8.29115	0	125.58	2.79254	41.9729
hsa_miR_550a_3_5p	0	10.5005	0	0	0	0	0	19.2487	0	0
[truncated: 311 more rows]

## Sheet: Table S4
Table S4. Raw count data from mRNAseq in the correlation study. Count data is expressed as counts per million (CPM) reads. Messenger RNA sequencing (mRNAseq), before prostatectomy (Pre-RP), after prostatectomy (post-RP).
[truncated: 53,157 more rows]

[truncated: 12 more sheets: Table S5, Table S6,  Table S7, Table S8, Table S9, Table S10, Table S11, Table S12, Table S13, Table S14, Table S15, Table S16]
